# Supplementary material for: Unveiling Molecular Signatures in Light-Induced Seed Germination: Insights from PIN3, PIN7, and AUX1 in Arabidopsis thaliana
Source: MDPI journal article supplement (doi:10.3390/plants13030408), 2024-01-30
Supplement: s1 [file s1]

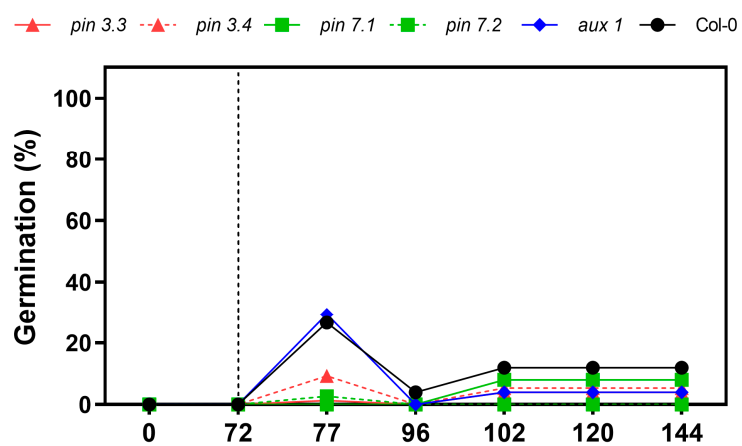

**Supplementary Figure S1:** Effect of prolonged incubation with NPA on the germination of FR-treated seeds and seeds kept in darkness
