# Supplementary material for: Unveiling Molecular Signatures in Light-Induced Seed Germination: Insights from PIN3, PIN7, and AUX1 in Arabidopsis thaliana
Source: Plants (Basel). 2024 Jan 30;13(3):408. doi: 10.3390/plants13030408 (PMC10856848; doi:10.3390/plants13030408)
Supplement: Supplementary file 1 [file plants-13-00408-s001.zip]

Archive with 4 entries (4 files):
- Supplementary_Figure_S1.pdf
- Supplementary_Figure_S1.tif
- Supplementary_Table_S1.xlsx
- Supplementary_Table_S2.xlsx
