# Supplementary material for: Unveiling Molecular Signatures in Light-Induced Seed Germination: Insights from PIN3, PIN7, and AUX1 in Arabidopsis thaliana
Source: Plants (Basel). 2024 Jan 30;13(3):408. doi: 10.3390/plants13030408 (PMC10856848; doi:10.3390/plants13030408)
Supplement: Supplementary file 1 [file plants-13-00408-s001.zip › Supplementary_Table_S1.xlsx]

## Sheet: Data from Fig. 1 
	Hormone	UP-regulated	DOWN-regulated	Total gene number	% UP-reg	% DOWN-reg	% Total
	Brassinosteroid	30	7	113	26.5487	6.19469	32.7434
	Gibberellin	24	21	150	16	14	30
	Abscisic acid	106	209	1136	9.33099	18.3979	27.7289
	Jasmonic Acid	83	88	675	12.2963	13.037	25.3333
	Cytokinins	24	16	159	15.0943	10.0629	25.1572
	Auxin	69	42	454	15.1982	9.2511	24.4493
	Ethylene	31	27	270	11.4815	10	21.4815
		Data from Tognacca et al., 2019		Data from AmiGO 2	Genes affected by R-light

## Sheet: Up-reg
	symbol	sharedLocus	geneCoord	start	end	width	effWidth	logFC	pvalue	gen.fdr
AT5G26220	AT5G26220	-	5:9162969-9164685	9162969	9164685	1717	932	-8.98941	4.28317e-28	3.6305e-27
AT4G23680	AT4G23680	-	4:12336186-12337482	12336186	12337482	1297	751	-7.15371	5.44217e-37	6.94195e-36
AT2G36040	AT2G36040	-	2:15130646-15130828	15130646	15130828	183	183	-6.93638	6.09461e-09	1.58202e-08
AT5G17480	APC1	-	5:5762689-5762940	5762689	5762940	252	252	-6.81613	4.79328e-09	1.25345e-08
AT3G05936	AT3G05936	-	3:1773832-1774589	1773832	1774589	758	758	-5.79029	2.54536e-34	2.87811e-33
AT4G31760	AT4G31760	-	4:15368032-15369724	15368032	15369724	1693	1065	-5.7776	2.13569e-44	3.68509e-43
AT2G44460	BGLU28	-	2:18346439-18349966	18346439	18349966	3528	1950	-5.51063	6.32877e-35	7.36775e-34
AT5G66260	AT5G66260	-	5:26471269-26471658	26471269	26471658	390	300	-5.29022	6.15703e-48	1.23046e-46
AT5G59130	AT5G59130	-	5:23870098-23873720	23870098	23873720	3623	2334	-4.9796	8.27326e-154	6.08876e-151
AT4G16230	AT4G16230	-	4:9185298-9186779	9185298	9186779	1482	999	-4.8941	1.57636e-49	3.33539e-48
AT4G16220	AT4G16220	-	4:9182283-9183922	9182283	9183922	1640	645	-4.84921	2.32062e-14	8.93363e-14
AT1G54020	AT1G54020	-	1:20161670-20163748	20161670	20163748	2079	1387	-4.76602	4.2846e-30	3.97835e-29
AT3G26450	AT3G26450	-	3:9681298-9683434	9681298	9683434	2137	889	-4.75597	2.5488e-17	1.18234e-16
AT5G23830	AT5G23830	-	5:8033738-8034930	8033738	8034930	1193	777	-4.75145	3.25896e-15	1.33151e-14
AT3G19850	AT3G19850	-	3:6898181-6901255	6898181	6901255	3075	1965	-4.72602	2.15607e-28	1.8554e-27
AT5G13225	AT5G13225	-	5:4222003-4222085	4222003	4222085	83	83	-4.69246	3.52742e-27	2.85551e-26
AT1G53543	AT1G53543	-	1:19981969-19982124	19981969	19982124	156	156	-4.67573	8.72139e-08	2.06587e-07
AT1G26233	SNOR95	-	1:9076048-9076182	9076048	9076182	135	135	-4.65683	8.14699e-19	4.13134e-18
AT2G28950	ATEXPA6	-	2:12431341-12433595	12431341	12433595	2255	1386	-4.65216	7.28027e-28	6.10972e-27
AT3G28220	AT3G28220	-	3:10524404-10526728	10524404	10526728	2325	1360	-4.5803	1.64355e-21	9.84097e-21
AT5G47330	AT5G47330	-	5:19207099-19208822	19207099	19208822	1724	1127	-4.56672	3.87468e-39	5.44288e-38
AT3G45320	AT3G45320	-	3:16631646-16632146	16631646	16632146	501	501	-4.47229	2.25637e-34	2.55646e-33
AT4G37409	AT4G37409	-	4:17590769-17592911	17590769	17592911	2143	1522	-4.45407	6.54211e-53	1.5575e-51
AT4G37410	CYP81F4	-	4:17590772-17592920	17590772	17592920	2149	1722	-4.44989	3.23131e-53	7.76937e-52
AT3G23430	PHO1	-	3:8387508-8393296	8387508	8393296	5789	2713	-4.44227	3.36324e-61	1.07821e-59
AT1G20020	ATLFNR2	-	1:6942717-6945018	6942717	6945018	2302	1397	-4.43626	3.87021e-27	3.12552e-26
AT1G64200	VHA-E3	-	1:23828526-23830002	23828526	23830002	1477	725	-4.4094	2.65998e-20	1.48894e-19
AT1G26762	AT1G26762	-	1:9253631-9254167	9253631	9254167	537	537	-4.40858	9.33265e-50	1.98709e-48
AT5G45650	AT5G45650	-	5:18513431-18518868	18513431	18518868	5438	2543	-4.37847	2.08449e-144	1.03777e-141
AT1G34245	EPF2	-	1:12472868-12473754	12472868	12473754	887	608	-4.35299	8.52606e-25	6.17018e-24
AT1G70830	MLP28	-	1:26709947-26711462	26709947	26711462	1516	1339	-4.35192	1.45325e-72	7.1302e-71
AT3G58070	GIS	-	3:21506613-21507654	21506613	21507654	1042	1042	-4.31902	4.12006e-32	4.24727e-31
AT5G24150	SQP1	-	5:8172316-8175431	8172316	8175431	3116	1865	-4.27704	8.43851e-142	3.57097e-139
AT4G12910	scpl20	-	4:7550433-7553332	7550433	7553332	2900	1918	-4.25971	2.91136e-115	5.60006e-113
AT4G22570	APT3	-	4:11882126-11885421	11882126	11885421	3296	907	-4.23944	9.31366e-21	5.34959e-20
AT4G20230	AT4G20230	-	4:10924121-10926758	10924121	10926758	2638	1958	-4.23717	7.26e-26	5.54308e-25
AT3G21710	AT3G21710	-	3:7648342-7649799	7648342	7649799	1458	1227	-4.2236	7.47093e-84	5.54651e-82
AT5G48850	ATSDI1	-	5:19805437-19807759	19805437	19807759	2323	1120	-4.22286	7.05025e-107	1.0849e-104
AT1G70230	TBL27	-	1:26450245-26451945	26450245	26451945	1701	1616	-4.16542	9.63949e-35	1.11453e-33
AT5G45950	AT5G45950	-	5:18634079-18636699	18634079	18636699	2621	1337	-4.16293	3.30096e-30	3.08533e-29
AT1G69530	EXP1	-	1:26141836-26143500	26141836	26143500	1665	1400	-4.15074	1.61501e-124	4.27144e-122
AT1G53542	AT1G53542	-	1:19981628-19981813	19981628	19981813	186	186	-4.14851	1.24574e-70	5.73006e-69
AT3G58120	ATBZIP61	-	3:21520974-21523327	21520974	21523327	2354	1554	-4.14325	2.7269e-29	2.45001e-28
AT2G16580	AT2G16580	-	2:7184422-7186968	7184422	7186968	2547	893	-4.14312	8.26001e-56	2.16435e-54
AT1G04220	KCS2	-	1:1119699-1122526	1119699	1122526	2828	1784	-4.13642	7.55688e-52	1.72859e-50
AT4G24510	CER2	-	4:12660749-12662656	12660749	12662656	1908	1565	-4.13329	3.24167e-40	4.7756e-39
AT1G19376	AT1G19376	-	1:6697438-6697524	6697438	6697524	87	87	-4.11067	1.08013e-25	8.16951e-25
AT1G43780	scpl44	-	1:16563811-16567399	16563811	16567399	3589	1440	-4.1054	1.69486e-104	2.43127e-102
AT1G62570	FMO.GS-OX4	-	1:23169136-23172105	23169136	23172105	2970	1779	-4.09096	7.90167e-94	8.05733e-92
AT1G43800	AT1G43800	-	1:16577610-16579722	16577610	16579722	2113	1401	-4.07565	6.16413e-19	3.15991e-18
AT2G47520	HRE2	-	2:19502802-19503569	19502802	19503569	768	684	-4.05343	1.30727e-22	8.3095e-22
AT3G61820	AT3G61820	-	3:22879804-22881630	22879804	22881630	1827	1827	-4.0322	1.81583e-126	4.95752e-124
AT4G15300	CYP702A2	-	4:8730723-8732748	8730723	8732748	2026	1464	-4.0057	1.52411e-25	1.14153e-24
AT5G56320	ATHEXP.ALPHA.1.5	-	5:22808641-22810237	22808641	22810237	1597	1203	-4.00322	1.17327e-23	7.93765e-23
AT1G55370	NDF5	-	1:20674783-20676449	20674783	20676449	1667	1588	-4.00178	2.48673e-43	4.10662e-42
AT4G34790	AT4G34790	-	4:16594469-16595153	16594469	16595153	685	685	-3.99465	5.0492e-107	7.91369e-105
AT3G62760	ATGSTF13	-	3:23217425-23218246	23217425	23218246	822	660	-3.97996	9.75697e-16	4.11861e-15
AT1G67760	AT1G67760	-	1:25405580-25406372	25405580	25406372	793	697	-3.97713	2.02271e-19	1.06928e-18
AT5G02350	AT5G02350	-	5:495311-497266	495311	497266	1956	1956	-3.96955	1.31288e-19	7.02819e-19
AT2G17850	AT2G17850	-	2:7760005-7760822	7760005	7760822	818	506	-3.96906	5.70569e-21	3.30981e-20
AT3G61890	ATHB-12	-	3:22914154-22915325	22914154	22915325	1172	986	-3.95529	1.91344e-27	1.56922e-26
AT5G15600	SP1L4	-	5:5078200-5079091	5078200	5079091	892	709	-3.95455	3.52322e-16	1.52526e-15
AT3G15720	AT3G15720	-	3:5325290-5327639	5325290	5327639	2350	1515	-3.94483	4.34275e-155	3.34135e-152
AT3G44990	XTR8	-	3:16446975-16448764	16446975	16448764	1790	1273	-3.92082	3.708e-61	1.18649e-59
AT3G50330	HEC2	-	3:18657208-18658307	18657208	18658307	1100	1100	-3.91467	3.78619e-47	7.35807e-46
AT3G09270	ATGSTU8	-	3:2848289-2849289	2848289	2849289	1001	856	-3.87349	1.03479e-39	1.49326e-38
AT1G80540	AT1G80540	-	1:30281638-30284319	30281638	30284319	2682	1678	-3.87218	1.78974e-23	1.19648e-22
AT4G31320	AT4G31320	-	4:15193993-15194562	15193993	15194562	570	570	-3.86832	5.94447e-53	1.41721e-51
AT2G35370	GDCH	-	2:14891102-14892218	14891102	14892218	1117	803	-3.86451	1.64523e-68	6.96222e-67
AT3G16430	JAL31	-	3:5581663-5583187	5581663	5583187	1525	1286	-3.86134	7.13131e-74	3.70281e-72
AT5G15150	HB-3	-	5:4913699-4915892	4913699	4915892	2194	1480	-3.85411	2.85539e-51	6.42728e-50
AT5G47900	AT5G47900	-	5:19392234-19395135	19392234	19395135	2902	1884	-3.84885	6.21537e-160	5.84487e-157
AT2G15090	KCS8	-	2:6542256-6543947	6542256	6543947	1692	1692	-3.83748	1.09174e-104	1.57948e-102
AT2G27920	SCPL51	-	2:11885571-11889176	11885571	11889176	3606	1748	-3.81397	8.88027e-136	3.06768e-133
AT3G23450	AT3G23450	-	3:8410433-8412193	8410433	8412193	1761	1761	-3.81323	2.93845e-29	2.63729e-28
AT5G43750	NDH18	-	5:17579966-17581222	17579966	17581222	1257	850	-3.80833	1.82712e-29	1.64859e-28
AT4G22230	AT4G22230	-	4:11762292-11762688	11762292	11762688	397	310	-3.80746	8.32141e-17	3.73526e-16
AT5G60810	RGF1	-	5:24466531-24467179	24466531	24467179	649	524	-3.80191	2.0613e-09	5.54389e-09
AT2G45180	AT2G45180	-	2:18626320-18626997	18626320	18626997	678	678	-3.77856	7.60201e-61	2.40972e-59
AT3G07320	AT3G07320	-	3:2332022-2334074	2332022	2334074	2053	1834	-3.77006	2.02474e-133	6.59093e-131
AT2G32690	GRP23	-	2:13863717-13864596	13863717	13864596	880	880	-3.75904	2.81431e-73	1.41358e-71
AT4G33560	AT4G33560	-	4:16135400-16135914	16135400	16135914	515	515	-3.75898	1.39867e-09	3.81552e-09
AT2G36050	ATOFP15	-	2:15135572-15136749	15135572	15136749	1178	1178	-3.7394	2.99483e-20	1.6681e-19
AT1G74670	AT1G74670	-	1:28053286-28054149	28053286	28054149	864	654	-3.73738	2.6657e-97	3.17762e-95
AT5G49800	AT5G49800	-	5:20234642-20236184	20234642	20236184	1543	907	-3.73392	6.26988e-36	7.64077e-35
AT3G55900	AT3G55900	-	3:20742330-20742653	20742330	20742653	324	324	-3.72895	5.06436e-23	3.30599e-22
AT3G51410	AT3G51410	-	3:19081257-19082212	19081257	19082212	956	956	-3.7257	5.34383e-29	4.72844e-28
AT1G26560	BGLU40	-	1:9178378-9181835	9178378	9181835	3458	1777	-3.72	1.32838e-49	2.81774e-48
AT1G71870	AT1G71870	-	1:27032456-27034895	27032456	27034895	2440	1533	-3.71872	1.15175e-32	1.21016e-31
AT4G39330	ATCAD9	-	4:18291218-18293383	18291218	18293383	2166	1744	-3.71851	5.53573e-69	2.3965e-67
AT5G58595	AT5G58595	-	5:23682880-23682963	23682880	23682963	84	84	-3.71005	6.04673e-35	7.0491e-34
AT1G26770	AT-EXP10	-	1:9259605-9261313	9259605	9261313	1709	1399	-3.70876	5.18473e-98	6.3138e-96
AT5G19190	AT5G19190	-	5:6457260-6458031	6457260	6458031	772	667	-3.70628	1.07066e-13	3.9475e-13
AT5G05290	EXPA2	-	5:1568694-1569864	1568694	1569864	1171	978	-3.68946	5.56164e-103	7.59208e-101
AT1G16635	AT1G16635	-	1:5685503-5686368	5685503	5686368	866	866	-3.67428	1.11357e-37	1.4646e-36
AT5G60890	ATMYB34	-	5:24494691-24496351	24494691	24496351	1661	1357	-3.6739	4.89836e-121	1.18449e-118
AT4G34800	AT4G34800	-	4:16596860-16597144	16596860	16597144	285	285	-3.66932	4.33791e-23	2.84054e-22
AT4G01450	AT4G01450	-	4:608454-610724	608454	610724	2271	1455	-3.66453	1.77075e-112	3.22296e-110
AT1G25425	CLE43	-	1:8922700-8923331	8922700	8923331	632	632	-3.66296	6.25749e-22	3.81696e-21
AT3G45010	scpl48	-	3:16466290-16468989	16466290	16468989	2700	1715	-3.65883	1.96038e-46	3.6748e-45
AT3G55910	AT3G55910	-	3:20742899-20743479	20742899	20743479	581	488	-3.65311	2.06959e-27	1.69237e-26
AT4G36880	CP1	-	4:17374458-17376225	17374458	17376225	1768	1410	-3.63035	9.76766e-74	5.01022e-72
AT5G45670	AT5G45670	-	5:18528494-18530450	18528494	18530450	1957	1481	-3.62956	2.59788e-128	7.32905e-126
AT2G34330	AT2G34330	-	2:14486539-14487401	14486539	14487401	863	863	-3.62386	9.26576e-20	5.00771e-19
AT1G24625	ZFP7	-	1:8725883-8727212	8725883	8727212	1330	1031	-3.62145	4.63983e-29	4.11843e-28
AT1G80340	GA4H	-	1:30200693-30202200	30200693	30202200	1508	1083	-3.60262	7.78003e-102	1.02885e-99
AT1G33750	AT1G33750	-	1:12233769-12236476	12233769	12236476	2708	1940	-3.59466	2.02761e-95	2.25798e-93
AT3G16370	AT3G16370	-	3:5556710-5558589	5556710	5558589	1880	1518	-3.5735	6.01168e-55	1.53666e-53
AT1G56680	AT1G56680	-	1:21250338-21251417	21250338	21251417	1080	933	-3.5697	6.40104e-18	3.07989e-17
AT3G58850	PAR2	-	3:21759352-21759942	21759352	21759942	591	591	-3.56927	2.35448e-37	3.05632e-36
AT4G08910	AT4G08910	-	4:5712346-5713384	5712346	5713384	1039	819	-3.56622	5.6511e-20	3.09703e-19
AT2G29680	CDC6	-	2:12689549-12693024	12689549	12693024	3476	1827	-3.56308	1.52826e-18	7.62419e-18
AT4G18501	AT4G18501	-	4:10209174-10209733	10209174	10209733	560	560	-3.56269	1.3307e-11	4.22286e-11
AT2G40610	EXP8	-	2:16948863-16950557	16948863	16950557	1695	1105	-3.55324	1.37858e-143	6.14084e-141
AT1G08920	ESL1	-	1:2867259-2870656	2867259	2870656	3398	2019	-3.55307	2.47763e-28	2.12564e-27
AT1G12805	AT1G12805	-	1:4366597-4367119	4366597	4367119	523	523	-3.55185	8.78402e-85	6.69761e-83
AT1G67750	AT1G67750	-	1:25401588-25403503	25401588	25403503	1916	1637	-3.54948	1.3159e-58	3.77531e-57
AT2G37640	ATEXPA3	-	2:15787705-15789853	15787705	15789853	2149	1202	-3.53737	1.95113e-103	2.68511e-101
AT1G19830	AT1G19830	-	1:6852155-6852872	6852155	6852872	718	718	-3.53612	5.20521e-18	2.51523e-17
AT1G06080	ADS1	-	1:1843568-1846302	1843568	1846302	2735	1220	-3.52087	3.32576e-153	2.16519e-150
AT4G12870	AT4G12870	-	4:7542233-7543474	7542233	7543474	1242	795	-3.51731	1.50857e-40	2.24785e-39
AT2G14820	NPY2	-	2:6358864-6361300	6358864	6361300	2437	1905	-3.51408	1.35924e-25	1.02303e-24
AT4G40060	ATHB16	-	4:18571359-18573084	18571359	18573084	1726	1518	-3.50756	2.79147e-109	4.64086e-107
AT5G43760	KCS20	-	5:17585763-17588597	17585763	17588597	2835	1841	-3.50446	2.84864e-94	2.99497e-92
AT5G13170	SAG29	-	5:4181042-4183306	4181042	4183306	2265	1303	-3.50433	2.10126e-77	1.23931e-75
AT1G53541	AT1G53541	-	1:19981385-19981495	19981385	19981495	111	111	-3.50193	6.04316e-42	9.49792e-41
AT1G12090	ELP	-	1:4089847-4090725	4089847	4090725	879	879	-3.49418	5.80674e-69	2.50104e-67
AT1G61840	AT1G61840	-	1:22847389-22849833	22847389	22849833	2445	2445	-3.49145	1.34046e-20	7.63713e-20
AT1G06350	AT1G06350	-	1:1935293-1936819	1935293	1936819	1527	1150	-3.4909	1.03171e-58	2.9751e-57
AT3G60870	AHL18	-	3:22493204-22494001	22493204	22494001	798	798	-3.47883	3.54101e-29	3.16299e-28
AT1G32385	AT1G32385	-	1:11685060-11685144	11685060	11685144	85	85	-3.47558	2.84713e-22	1.77377e-21
AT3G14740	AT3G14740	-	3:4952004-4953423	4952004	4953423	1420	1330	-3.47353	2.55559e-25	1.89398e-24
AT4G17670	AT4G17670	-	4:9833661-9834727	9833661	9834727	1067	831	-3.47241	3.38649e-48	6.81606e-47
AT1G62480	AT1G62480	-	1:23128705-23129759	23128705	23129759	1055	764	-3.47175	6.02277e-58	1.68508e-56
AT4G04830	MSRB5	-	4:2445794-2447086	2445794	2447086	1293	742	-3.4634	8.50583e-21	4.89389e-20
AT5G55340	AT5G55340	-	5:22439851-22441005	22439851	22441005	1155	1155	-3.45966	4.43855e-20	2.44887e-19
AT5G23210	SCPL34	-	5:7810683-7815039	7810683	7815039	4357	2054	-3.45792	1.76242e-48	3.59428e-47
AT4G19120	ERD3	-	4:10460295-10464174	10460295	10464174	3880	2436	-3.45384	2.91894e-64	1.0468e-62
AT4G03965	AT4G03965	-	4:1889473-1890412	1889473	1890412	940	940	-3.44853	1.82075e-27	1.49611e-26
AT2G33330	PDLP3	-	2:14122890-14125137	14122890	14125137	2248	1315	-3.44447	5.0509e-83	3.60745e-81
AT5G09750	HEC3	-	5:3026401-3027075	3026401	3027075	675	675	-3.42802	5.40878e-12	1.76371e-11
AT1G64405	AT1G64405	-	1:23923732-23924336	23923732	23924336	605	605	-3.42174	1.08939e-10	3.24478e-10
AT1G28650	AT1G28650	-	1:10069365-10071082	10069365	10071082	1718	1340	-3.42047	1.01745e-108	1.67207e-106
AT1G05330	AT1G05330	-	1:1558170-1558583	1558170	1558583	414	414	-3.42043	9.53763e-30	8.73184e-29
AT4G36240	GATA7	-	4:17147196-17148221	17147196	17148221	1026	907	-3.41788	7.51569e-19	3.81807e-18
AT4G39940	AKN2	-	4:18519717-18521568	18519717	18521568	1852	1244	-3.4135	4.43413e-86	3.52378e-84
AT4G18970	AT4G18970	-	4:10388722-10390991	10388722	10390991	2270	1767	-3.41257	7.17943e-63	2.45013e-61
AT1G28660	AT1G28660	-	1:10071712-10073411	10071712	10073411	1700	1336	-3.40521	2.78128e-60	8.65417e-59
AT5G67060	HEC1	-	5:26766128-26767250	26766128	26767250	1123	1123	-3.40106	1.84482e-38	2.51427e-37
AT4G13660	PRR2	-	4:7946155-7948376	7946155	7948376	2222	1206	-3.4008	7.62564e-34	8.43104e-33
AT1G23150	AT1G23150	AT1G23149	1:8206549-8207618	8206549	8207618	1070	982	-3.39903	1.21878e-18	6.10363e-18
AT1G23149	CPuORF29	AT1G23150	1:8206549-8207618	8206549	8207618	1070	982	-3.39902	1.23043e-18	6.15649e-18
AT4G19030	NLM1	-	4:10421525-10423487	10421525	10423487	1963	1172	-3.39572	1.35606e-38	1.85561e-37
AT4G30290	ATXTH19	-	4:14828712-14830016	14828712	14830016	1305	1127	-3.38997	5.92658e-100	7.48651e-98
AT2G15050	LTP7	-	2:6518840-6520160	6518840	6520160	1321	803	-3.38732	1.08595e-34	1.25217e-33
AT1G53070	AT1G53070	-	1:19778333-19779373	19778333	19779373	1041	1041	-3.38542	1.53985e-33	1.67945e-32
AT3G24770	CLE41	-	3:9046533-9047463	9046533	9047463	931	931	-3.38152	1.11145e-45	2.02079e-44
AT4G31330	AT4G31330	-	4:15202296-15203431	15202296	15203431	1136	1058	-3.38121	8.4986e-75	4.56685e-73
AT2G28510	AT2G28510	-	2:12199098-12200765	12199098	12200765	1668	1290	-3.37911	1.11718e-117	2.39374e-115
AT2G20835	AT2G20835	-	2:8970886-8971303	8970886	8971303	418	418	-3.3735	7.0671e-54	1.7489e-52
AT4G23670	AT4G23670	-	4:12332560-12333804	12332560	12333804	1245	890	-3.37348	5.6365e-22	3.4506e-21
AT4G37810	AT4G37810	-	4:17780970-17781745	17780970	17781745	776	588	-3.3731	3.21579e-12	1.06482e-11
AT4G11340	AT4G11340	-	4:6894208-6899130	6894208	6899130	4923	1488	-3.3682	1.89655e-45	3.42248e-44
AT2G28470	BGAL8	-	2:12168840-12173679	12168840	12173679	4840	3177	-3.35562	1.40019e-129	4.08639e-127
AT4G39950	CYP79B2	-	4:18525246-18527579	18525246	18527579	2334	1986	-3.35557	7.82503e-64	2.73666e-62
AT3G52630	AT3G52630	-	3:19513979-19514745	19513979	19514745	767	538	-3.35527	1.32079e-22	8.39226e-22
AT3G16150	AT3G16150	-	3:5471735-5473276	5471735	5473276	1542	1280	-3.35527	2.11145e-56	5.61957e-55
AT1G02450	NIMIN1	-	1:497976-498516	497976	498516	541	541	-3.35165	1.92916e-15	8.01146e-15
AT4G21490	NDB3	-	4:11436495-11439326	11436495	11439326	2832	1743	-3.34756	1.19959e-29	1.08934e-28
AT3G28180	ATCSLC04	-	3:10505829-10509239	10505829	10509239	3411	2475	-3.34227	1.31454e-111	2.36715e-109
AT4G02290	GH9B13	-	4:1002394-1005253	1002394	1005253	2860	1939	-3.33372	3.44161e-22	2.13003e-21
AT2G17280	AT2G17280	-	2:7513128-7515048	7513128	7515048	1921	1159	-3.33342	4.00573e-18	1.94618e-17
AT1G71880	SUC1	-	1:27054180-27056341	27054180	27056341	2162	1937	-3.33148	2.18842e-90	2.03535e-88
AT3G13525	AT3G13525	-	3:4411168-4411253	4411168	4411253	86	86	-3.33063	1.99505e-10	5.83856e-10
AT1G08500	ENODL18	-	1:2689016-2690045	2689016	2690045	1030	945	-3.33	1.15319e-121	2.87058e-119
AT1G20015	AT1G20015	-	1:6941285-6941373	6941285	6941373	89	89	-3.32803	5.36915e-21	3.121e-20
AT1G49430	LACS2	-	1:18291043-18295825	18291043	18295825	4783	2327	-3.32572	3.56844e-82	2.48572e-80
AT4G20370	TSF	-	4:11000771-11002996	11000771	11002996	2226	799	-3.32257	3.0925e-11	9.57855e-11
AT1G73620	AT1G73620	-	1:27681408-27683130	27681408	27683130	1723	995	-3.31793	3.08275e-30	2.89095e-29
AT3G16410	NSP4	-	3:5571992-5574541	5571992	5574541	2550	2106	-3.31691	2.29973e-48	4.66198e-47
AT3G29035	NAC3	-	3:11033665-11035308	11033665	11035308	1644	1433	-3.31502	2.6816e-20	1.50005e-19
AT3G09680	AT3G09680	-	3:2969045-2970371	2969045	2970371	1327	661	-3.31497	1.63005e-34	1.85929e-33
AT3G28130	AT3G28130	-	3:10465516-10468911	10465516	10468911	3396	1488	-3.31158	3.54071e-71	1.66946e-69
AT1G28670	ARAB-1	-	1:10074507-10076344	10074507	10076344	1838	1411	-3.31066	4.14213e-26	3.20155e-25
AT4G15160	AT4G15160	-	4:8646150-8647252	8646150	8647252	1103	1103	-3.30874	5.90167e-37	7.52241e-36
AT5G26260	AT5G26260	-	5:9200463-9202400	9200463	9202400	1938	1332	-3.30586	6.13633e-73	3.064e-71
AT3G16450	AT3G16450	-	3:5588394-5590055	5588394	5590055	1662	1365	-3.30454	5.21176e-53	1.2478e-51
AT4G21200	ATGA2OX8	-	4:11302685-11306601	11302685	11306601	3917	1174	-3.30211	7.14873e-16	3.0396e-15
AT4G13710	AT4G13710	-	4:7962430-7966518	7962430	7966518	4089	2039	-3.30204	1.44561e-24	1.03248e-23
AT1G09380	AT1G09380	-	1:3026135-3029549	3026135	3029549	3415	1568	-3.30165	2.20271e-144	1.06529e-141
AT1G13080	CYP71B2	-	1:4459166-4460940	4459166	4460940	1775	1688	-3.29956	1.54631e-87	1.30221e-85
AT5G38430	AT5G38430	-	5:15384117-15385247	15384117	15385247	1131	808	-3.29235	6.83696e-30	6.2999e-29
AT3G49570	LSU3	-	3:18372533-18373024	18372533	18373024	492	492	-3.29196	2.72866e-21	1.61384e-20
AT3G09260	BGLU23	-	3:2840477-2843781	2840477	2843781	3305	1806	-3.28786	3.37579e-86	2.69537e-84
AT5G01040	LAC8	-	5:13128-16173	13128	16173	3046	2052	-3.28713	5.60601e-46	1.02587e-44
AT3G29300	AT3G29300	-	3:11247011-11247652	11247011	11247652	642	642	-3.28444	1.59628e-12	5.39759e-12
AT5G38410	AT5G38410	-	5:15377173-15378416	15377173	15378416	1244	999	-3.28299	2.12928e-31	2.12139e-30
AT2G24560	AT2G24560	-	2:10431537-10432933	10431537	10432933	1397	1092	-3.28296	5.87635e-64	2.07227e-62
AT3G06750	AT3G06750	-	3:2129623-2130315	2129623	2130315	693	693	-3.28096	1.12794e-34	1.29793e-33
AT2G41800	AT2G41800	-	2:17436529-17438040	17436529	17438040	1512	1290	-3.27507	3.26047e-30	3.04917e-29
AT2G44580	AT2G44580	-	2:18401878-18403416	18401878	18403416	1539	1368	-3.27368	7.05076e-37	8.96008e-36
AT3G43800	ATGSTU27	-	3:15660859-15661925	15660859	15661925	1067	895	-3.25816	2.24256e-46	4.18982e-45
AT5G06250	AT5G06250	-	5:1892714-1894124	1892714	1894124	1411	915	-3.25678	3.12812e-37	4.04196e-36
AT5G12960	AT5G12960	-	5:4097701-4101668	4097701	4101668	3968	2835	-3.25434	2.82066e-28	2.41259e-27
AT2G03090	ATEXP15	-	2:916854-918643	916854	918643	1790	1358	-3.25396	7.6696e-83	5.43194e-81
AT2G21370	XK-1	-	2:9137454-9140081	9137454	9140081	2628	1600	-3.25359	2.39397e-39	3.38536e-38
AT4G33220	PME44	-	4:16022439-16026360	16022439	16026360	3922	1875	-3.25131	1.58257e-105	2.30932e-103
AT1G02640	BXL2	-	1:564205-567769	564205	567769	3565	2584	-3.24998	7.00149e-72	3.34786e-70
AT2G40435	AT2G40435	-	2:16886824-16888638	16886824	16888638	1815	932	-3.24804	2.3798e-26	1.85124e-25
AT2G26040	PYL2	-	2:11094832-11095404	11094832	11095404	573	573	-3.24572	6.23489e-58	1.74155e-56
AT5G22500	FAR1	-	5:7470443-7474120	7470443	7474120	3678	1778	-3.24315	1.87666e-118	4.23551e-116
AT1G65985	AT1G65985	-	1:24562553-24568530	24562553	24568530	5978	1456	-3.24047	7.10124e-19	3.62056e-18
AT1G71890	SUC5	-	1:27058439-27060785	27058439	27060785	2347	1804	-3.23798	1.25504e-18	6.27595e-18
AT5G53880	AT5G53880	-	5:21872794-21873303	21872794	21873303	510	510	-3.23091	1.23867e-17	5.85181e-17
AT4G34600	AT4G34600	-	4:16529225-16530199	16529225	16530199	975	548	-3.23007	4.80706e-51	1.07631e-49
AT2G43480	AT2G43480	-	2:18053002-18054387	18053002	18054387	1386	1052	-3.22732	7.04788e-20	3.84217e-19
AT2G39890	PROT1	-	2:16655628-16658331	16655628	16658331	2704	1852	-3.22132	1.26354e-110	2.18245e-108
AT4G18500	AT4G18500	-	4:10209148-10209411	10209148	10209411	264	201	-3.22019	2.05155e-07	4.71041e-07
AT1G27930	AT1G27930	-	1:9731260-9732719	9731260	9732719	1460	1460	-3.21827	2.21771e-32	2.29879e-31
AT3G15356	AT3G15356	-	3:5174402-5175469	5174402	5175469	1068	1068	-3.21729	2.578e-14	9.88624e-14
AT1G18250	ATLP-1	-	1:6276788-6278150	6276788	6278150	1363	1116	-3.21604	9.26039e-91	8.85597e-89
AT1G53180	AT1G53180	-	1:19831441-19832895	19831441	19832895	1455	1386	-3.21051	7.43779e-16	3.15537e-15
AT4G39210	APL3	-	4:18259609-18263417	18259609	18263417	3809	1959	-3.20616	1.21952e-123	3.1277e-121
AT2G32560	AT2G32560	-	2:13824794-13826986	13824794	13826986	2193	1367	-3.20285	4.94795e-66	1.86951e-64
AT1G04020	BARD1	-	1:1036537-1040224	1036537	1040224	3688	2401	-3.20185	1.1247e-31	1.13794e-30
AT3G43720	AT3G43720	-	3:15615386-15617149	15615386	15617149	1764	795	-3.19308	2.29729e-53	5.55518e-52
AT3G16400	NSP1	-	3:5566086-5568545	5566086	5568545	2460	2058	-3.19179	4.91469e-52	1.12878e-50
AT3G55890	AT3G55890	-	3:20740817-20742002	20740817	20742002	1186	591	-3.18985	1.74471e-23	1.16776e-22
AT2G46740	AT2G46740	-	2:19205157-19207455	19205157	19207455	2299	1798	-3.18948	2.48222e-16	1.08346e-15
AT4G03292	AT4G03292	-	4:1444672-1445220	1444672	1445220	549	549	-3.18917	1.22029e-29	1.10695e-28
AT2G37460	AT2G37460	-	2:15726448-15729098	15726448	15729098	2651	1450	-3.18909	3.18169e-53	7.66096e-52
AT3G50750	BEH1	-	3:18861839-18863234	18861839	18863234	1396	1311	-3.18547	2.39347e-44	4.11313e-43
AT1G06360	AT1G06360	-	1:1938963-1940459	1938963	1940459	1497	1152	-3.18421	1.26639e-57	3.48557e-56
AT5G49630	AAP6	-	5:20142470-20146498	20142470	20146498	4029	1714	-3.18101	6.36947e-116	1.25367e-113
AT2G23010	SCPL9	-	2:9798843-9802674	9798843	9802674	3832	1507	-3.18037	8.61331e-65	3.11533e-63
AT1G78206	MIR775A	-	1:29422452-29422574	29422452	29422574	123	123	-3.17741	5.50588e-23	3.5873e-22
AT2G16230	AT2G16230	-	2:7035463-7038326	7035463	7038326	2864	1512	-3.17671	1.04645e-17	4.96866e-17
AT1G19373	AT1G19373	-	1:6697178-6697253	6697178	6697253	76	76	-3.17448	3.10004e-10	8.93941e-10
AT1G09310	AT1G09310	-	1:3009055-3009880	3009055	3009880	826	826	-3.17324	1.27252e-50	2.80104e-49
AT1G16360	AT1G16360	-	1:5593301-5595179	5593301	5595179	1879	1203	-3.16309	3.39945e-16	1.47394e-15
AT1G76160	sks5	-	1:28577942-28581133	28577942	28581133	3192	2008	-3.16273	5.53011e-80	3.60031e-78
AT5G18290	SIP1;2	-	5:6055028-6058368	6055028	6058368	3341	1295	-3.15697	3.8932e-33	4.18413e-32
AT2G03130	AT2G03130	-	2:940744-941076	940744	941076	333	333	-3.15682	1.51413e-06	3.22184e-06
AT5G01050	AT5G01050	-	5:18086-20812	18086	20812	2727	1884	-3.15462	1.97218e-19	1.04485e-18
AT3G01940	AT3G01940	-	3:322831-323053	322831	323053	223	223	-3.15333	1.63203e-06	3.46053e-06
AT2G23630	sks16	-	2:10052566-10055317	10052566	10055317	2752	1647	-3.14705	1.10885e-25	8.37921e-25
AT5G23820	AT5G23820	-	5:8031268-8033020	8031268	8033020	1753	824	-3.14427	3.19994e-72	1.56096e-70
AT3G17790	PAP17	-	3:6089605-6091231	6089605	6091231	1627	1434	-3.14263	5.11035e-156	4.11918e-153
AT1G01610	ATGPAT4	-	1:221691-224340	221691	224340	2650	1856	-3.13642	8.20318e-106	1.20744e-103
AT4G10270	AT4G10270	-	4:6374734-6375210	6374734	6375210	477	477	-3.13537	5.31211e-90	4.88686e-88
AT1G78210	AT1G78210	-	1:29422716-29424375	29422716	29424375	1660	1130	-3.1347	2.45429e-37	3.18099e-36
AT3G02110	scpl25	-	3:370762-373722	370762	373722	2961	1647	-3.12867	1.98682e-90	1.85806e-88
AT5G66985	AT5G66985	-	5:26743279-26743808	26743279	26743808	530	530	-3.12392	9.39669e-53	2.2277e-51
AT4G26790	AT4G26790	-	4:13487457-13489376	13487457	13489376	1920	1685	-3.11484	1.29351e-93	1.31109e-91
AT5G57180	CIA2	-	5:23167842-23170999	23167842	23170999	3158	2525	-3.11094	1.16552e-96	1.3606e-94
AT1G60630	AT1G60630	-	1:22334662-22336908	22334662	22336908	2247	2174	-3.10714	1.66848e-15	6.95283e-15
AT1G74660	MIF1	-	1:28047576-28048127	28047576	28048127	552	552	-3.10396	7.84704e-09	2.0211e-08
AT2G22420	AT2G22420	-	2:9513219-9514535	9513219	9514535	1317	1163	-3.09938	3.36839e-133	1.07579e-130
AT2G20980	MCM10	-	2:9011389-9013931	9011389	9013931	2543	1531	-3.09896	7.01594e-24	4.81e-23
AT5G14750	WER	-	5:4763452-4764738	4763452	4764738	1287	816	-3.09753	4.23755e-64	1.50375e-62
AT1G23080	ATPIN7	-	1:8180577-8183570	8180577	8183570	2994	2827	-3.09144	1.30729e-73	6.64521e-72
AT4G34760	AT4G34760	-	4:16582183-16582879	16582183	16582879	697	697	-3.08945	3.24921e-48	6.54755e-47
AT1G18075	MIR159	-	1:6220648-6220833	6220648	6220833	186	186	-3.08685	1.38425e-11	4.3887e-11
AT3G14320	AT3G14320	-	3:4777731-4778345	4777731	4778345	615	615	-3.08638	1.27593e-11	4.05742e-11
AT1G68825	DVL5	-	1:25869700-25870420	25869700	25870420	721	630	-3.08355	1.1957e-11	3.8122e-11
AT1G67740	PSBY	-	1:25394068-25395154	25394068	25395154	1087	1087	-3.08266	1.0658e-21	6.42934e-21
AT5G45930	CHLI2	-	5:18628007-18629697	18628007	18629697	1691	1477	-3.08236	1.1636e-42	1.87227e-41
AT2G26450	AT2G26450	-	2:11251120-11253612	11251120	11253612	2493	2170	-3.08211	1.42703e-23	9.58927e-23
AT5G12950	AT5G12950	-	5:4092953-4096975	4092953	4096975	4023	2919	-3.07881	1.1432e-69	5.09233e-68
AT5G36120	CCB3	-	5:14198587-14199243	14198587	14199243	657	657	-3.0782	1.03665e-20	5.94425e-20
AT5G55650	AT5G55650	-	5:22536360-22536824	22536360	22536824	465	465	-3.07421	5.14704e-07	1.14246e-06
AT5G65170	AT5G65170	-	5:26041174-26042406	26041174	26042406	1233	1233	-3.07407	3.35066e-18	1.6326e-17
AT4G30610	BRS1	-	4:14944129-14948605	14944129	14948605	4477	1702	-3.07377	1.34201e-63	4.65497e-62
AT4G16140	AT4G16140	-	4:9129016-9129841	9129016	9129841	826	826	-3.07238	1.75192e-50	3.83631e-49
AT1G56580	SVB	-	1:21198259-21198956	21198259	21198956	698	698	-3.06798	1.94055e-90	1.82487e-88
AT5G08370	AtAGAL2	-	5:2690879-2693550	2690879	2693550	2672	1537	-3.06778	4.14479e-55	1.0695e-53
AT5G58900	AT5G58900	-	5:23783123-23785334	23783123	23785334	2212	1686	-3.06711	4.63252e-57	1.25664e-55
AT1G76790	AT1G76790	-	1:28822186-28823673	28822186	28823673	1488	1316	-3.06429	1.94707e-75	1.07355e-73
AT1G20450	ERD10	-	1:7088003-7089606	7088003	7089606	1604	1524	-3.06189	7.5399e-36	9.15551e-35
AT5G59510	DVL18	-	5:23990074-23990696	23990074	23990696	623	623	-3.06117	3.29399e-15	1.34485e-14
AT1G23410	AT1G23410	-	1:8314924-8315531	8314924	8315531	608	608	-3.05644	3.28772e-83	2.37826e-81
AT1G43560	Aty2	-	1:16398099-16399878	16398099	16399878	1780	814	-3.05538	7.09958e-123	1.79365e-120
AT2G23050	NPY4	-	2:9810657-9812660	9810657	9812660	2004	1766	-3.0509	5.80676e-23	3.78042e-22
AT1G64670	BDG1	-	1:24030820-24033556	24030820	24033556	2737	1662	-3.05023	5.95738e-42	9.37181e-41
AT4G34588	CPuORF2	AT4G34590	4:16521861-16523230	16521861	16523230	1370	1370	-3.05022	4.3198e-48	8.66365e-47
AT4G34590	GBF6	AT4G34588	4:16521861-16523230	16521861	16523230	1370	1370	-3.05022	4.31566e-48	8.66365e-47
AT3G16420	PBP1	-	3:5579386-5580953	5579386	5580953	1568	1329	-3.04657	2.65241e-59	7.86294e-58
AT4G08685	SAH7	-	4:5550429-5551370	5550429	5551370	942	725	-3.04445	1.51914e-19	8.1067e-19
AT5G20270	HHP1	-	5:6840833-6842858	6840833	6842858	2026	1393	-3.04408	4.10015e-58	1.15097e-56
AT3G05400	AT3G05400	-	3:1549586-1554176	1549586	1554176	4591	1739	-3.04181	3.37702e-08	8.27127e-08
AT4G28290	AT4G28290	-	4:14011844-14012583	14011844	14012583	740	550	-3.0414	8.52597e-10	2.36861e-09
AT5G60360	ALP	-	5:24279897-24282397	24279897	24282397	2501	1473	-3.03978	2.4728e-93	2.49149e-91
AT5G18660	PCB2	-	5:6220781-6222228	6220781	6222228	1448	1448	-3.03742	2.11884e-32	2.20169e-31
AT2G39880	MYB25	-	2:16647945-16649479	16647945	16649479	1535	1104	-3.03723	4.41513e-18	2.14017e-17
AT5G48940	AT5G48940	-	5:19839710-19843807	19839710	19843807	4098	3546	-3.03507	2.41036e-62	8.07923e-61
AT4G34135	UGT73B2	-	4:16345281-16347133	16345281	16347133	1853	1825	-3.03462	2.67126e-45	4.78987e-44
AT4G14723	AT4G14723	-	4:8439899-8440839	8439899	8440839	941	744	-3.03047	9.17867e-14	3.40047e-13
AT1G22340	AtUGT85A7	-	1:7890464-7892090	7890464	7892090	1627	1464	-3.02389	1.69794e-20	9.61882e-20
AT5G50740	AT5G50740	-	5:20635866-20637996	20635866	20637996	2131	1228	-3.02323	1.72886e-87	1.44874e-85
AT1G77990	SULTR2;2	-	1:29317899-29323352	29317899	29323352	5454	2203	-3.01946	4.36979e-15	1.7721e-14
AT1G78520	AT1G78520	-	1:29537976-29538656	29537976	29538656	681	348	-3.01623	1.27068e-08	3.21556e-08
AT4G13195	CLE44	-	4:7662371-7663177	7662371	7663177	807	807	-3.01243	2.31741e-13	8.32488e-13
AT3G55820	AT3G55820	-	3:20713709-20714805	20713709	20714805	1097	1097	-3.0113	1.21129e-14	4.75277e-14
AT2G41475	AT2G41475	-	2:17295074-17296420	17295074	17296420	1347	816	-3.01115	2.36004e-35	2.81129e-34
AT4G30860	ASHR3	-	4:15024472-15027616	15024472	15027616	3145	1757	-3.00655	2.47031e-20	1.38828e-19
AT4G33040	AT4G33040	-	4:15940561-15941330	15940561	15941330	770	770	-2.99592	1.47665e-34	1.68887e-33
AT3G60900	FLA10	-	3:22499360-22501239	22499360	22501239	1880	1880	-2.99422	1.9589e-21	1.16714e-20
AT3G22090	AT3G22090	-	3:7782912-7783561	7782912	7783561	650	542	-2.99181	1.12443e-08	2.86299e-08
AT3G23820	GAE6	-	3:8603444-8605462	8603444	8605462	2019	2019	-2.99026	5.64779e-57	1.52472e-55
AT5G48890	AT5G48890	-	5:19820353-19820874	19820353	19820874	522	522	-2.98874	1.6776e-27	1.38251e-26
AT5G58260	AT5G58260	-	5:23560876-23561944	23560876	23561944	1069	909	-2.98455	9.37001e-15	3.70922e-14
AT5G20250	DIN10	-	5:6833659-6836782	6833659	6836782	3124	2945	-2.98037	2.56625e-59	7.63427e-58
AT1G30120	PDH-E1.BETA	-	1:10584160-10586635	10584160	10586635	2476	1569	-2.97897	3.79263e-58	1.06641e-56
AT1G09180	ATSARA1A	-	1:2965023-2965972	2965023	2965972	950	737	-2.97594	8.35989e-12	2.69436e-11
AT5G46280	MCM3	-	5:18769697-18773658	18769697	18773658	3962	2588	-2.97275	4.15827e-24	2.87881e-23
AT5G54160	OMT1	-	5:21981996-21984363	21981996	21984363	2368	1367	-2.97045	3.65531e-71	1.71648e-69
AT1G04520	PDLP2	-	1:1231578-1234032	1231578	1234032	2455	1443	-2.96901	1.34574e-66	5.17712e-65
AT3G04730	IAA16	-	3:1288612-1290602	1288612	1290602	1991	1279	-2.96872	1.62126e-30	1.54522e-29
AT2G26580	YAB5	-	2:11303590-11306953	11303590	11306953	3364	905	-2.96786	3.74685e-39	5.27645e-38
AT1G33800	AT1G33800	-	1:12261419-12262717	12261419	12262717	1299	1216	-2.96429	1.98078e-29	1.78439e-28
AT1G20440	COR47	-	1:7084409-7085772	7084409	7085772	1364	1219	-2.96372	1.98165e-80	1.31543e-78
AT4G12730	FLA2	-	4:7491383-7492876	7491383	7492876	1494	1494	-2.9597	2.75294e-22	1.71635e-21
AT3G20210	DELTA-VPE	AT3G20220	3:7052382-7055452	7052382	7055452	3071	2081	-2.95682	4.02834e-45	7.15506e-44
AT3G59400	GUN4	-	3:21948717-21949710	21948717	21949710	994	994	-2.95629	9.3585e-25	6.74378e-24
AT5G57760	AT5G57760	-	5:23400715-23401267	23400715	23401267	553	553	-2.95599	3.31873e-08	8.13087e-08
AT5G40150	AT5G40150	-	5:16059509-16061043	16059509	16061043	1535	1535	-2.95585	2.39225e-31	2.3736e-30
AT4G26795	AT4G26795	-	4:13487209-13489601	13487209	13489601	2393	1587	-2.95168	3.78807e-71	1.76905e-69
AT5G45940	atnudt11	-	5:18629562-18630706	18629562	18630706	1145	881	-2.94792	1.16755e-15	4.89427e-15
AT4G30280	ATXTH18	-	4:14825808-14827047	14825808	14827047	1240	1048	-2.94539	6.51081e-07	1.43146e-06
AT3G52470	AT3G52470	-	3:19450649-19451982	19450649	19451982	1334	970	-2.94249	1.49239e-47	2.94082e-46
AT3G48700	ATCXE13	-	3:18038648-18039876	18038648	18039876	1229	1229	-2.94027	4.0299e-40	5.90599e-39
AT1G29080	AT1G29080	-	1:10157494-10158674	10157494	10158674	1181	1041	-2.93321	1.18584e-13	4.35416e-13
AT5G20740	AT5G20740	-	5:7025686-7026532	7025686	7026532	847	847	-2.93098	1.21243e-13	4.44989e-13
AT5G66270	AT5G66270	-	5:26473233-26475783	26473233	26475783	2551	1841	-2.92624	6.9095e-25	5.02609e-24
AT5G40670	AT5G40670	-	5:16285711-16287793	16285711	16287793	2083	1272	-2.9229	1.39697e-102	1.87671e-100
AT2G47450	CAO	-	2:19472681-19474314	19472681	19474314	1634	1634	-2.92281	5.13294e-45	9.06945e-44
AT1G44900	MCM2	-	1:16970214-16974641	16970214	16974641	4428	3072	-2.92262	5.72432e-67	2.24816e-65
AT1G64760	AT1G64760	-	1:24054143-24056414	24054143	24056414	2272	1725	-2.92068	2.4018e-17	1.1169e-16
AT5G67070	RALFL34	-	5:26768020-26768846	26768020	26768846	827	827	-2.91785	1.79792e-70	8.20308e-69
AT5G47770	FPS1	-	5:19345173-19347629	19345173	19347629	2457	1493	-2.9171	7.23276e-19	3.68256e-18
AT3G61660	AT3G61660	-	3:22816152-22816541	22816152	22816541	390	390	-2.91492	2.34391e-07	5.35358e-07
AT3G16250	NDF4	-	3:5506931-5508414	5506931	5508414	1484	869	-2.9145	1.39791e-11	4.43115e-11
AT4G00020	BRCA2A	-	4:2895-10455	2895	10455	7561	3959	-2.91433	2.82795e-26	2.19582e-25
AT3G10040	AT3G10040	-	3:3096415-3098071	3096415	3098071	1657	1657	-2.91317	1.1478e-66	4.45616e-65
AT3G50440	ATMES10	-	3:18717311-18718494	18717311	18718494	1184	1007	-2.91284	7.59439e-62	2.49612e-60
AT5G25830	GATA12	-	5:9004313-9005502	9004313	9005502	1190	1081	-2.91248	1.70138e-12	5.74148e-12
AT3G57950	AT3G57950	-	3:21460423-21460968	21460423	21460968	546	546	-2.90974	6.82011e-13	2.36662e-12
AT3G13750	BGAL1	-	3:4510965-4516298	4510965	4516298	5334	3313	-2.90773	2.94103e-116	5.92653e-114
AT1G58270	ZW9	-	1:21612116-21614117	21612116	21614117	2002	1497	-2.90771	3.10969e-60	9.62298e-59
AT3G20395	AT3G20395	-	3:7111948-7113870	7111948	7113870	1923	822	-2.90505	4.29623e-39	6.02505e-38
AT2G39560	AT2G39560	-	2:16504846-16506008	16504846	16506008	1163	1163	-2.903	4.94403e-22	3.03436e-21
AT3G20110	CYP705A20	-	3:7021332-7023279	7021332	7023279	1948	1862	-2.9006	5.47212e-20	3.00248e-19
AT5G01840	OFP1	-	5:324552-325516	324552	325516	965	965	-2.89794	2.45268e-14	9.41845e-14
AT1G66350	RGL	-	1:24748195-24750043	24748195	24750043	1849	1849	-2.89107	9.90033e-24	6.71944e-23
AT1G11600	CYP77B1	-	1:3902012-3903782	3902012	3903782	1771	1771	-2.8877	7.22789e-13	2.50556e-12
AT3G57160	AT3G57160	-	3:21157610-21158816	21157610	21158816	1207	609	-2.88692	1.04892e-17	4.97899e-17
AT5G64630	NFB1	-	5:25833174-25836384	25833174	25836384	3211	1890	-2.88417	2.26248e-15	9.33845e-15
AT3G62570	AT3G62570	-	3:23142485-23144609	23142485	23144609	2125	1836	-2.8839	1.9296e-18	9.55596e-18
AT5G08000	PDCB2	-	5:2563554-2565491	2563554	2565491	1938	924	-2.8829	1.39849e-21	8.40933e-21
AT2G04160	AIR3	-	2:1401268-1407745	1401268	1407745	6478	2552	-2.88085	9.53812e-30	8.73184e-29
AT3G02830	ZFN1	-	3:613802-616144	613802	616144	2343	1695	-2.87991	4.37428e-19	2.26641e-18
AT1G20010	TUB5	-	1:6937795-6940582	6937795	6940582	2788	1689	-2.87461	6.21884e-73	3.09607e-71
AT5G57090	WAV6	-	5:23100693-23104735	23100693	23104735	4043	2295	-2.87407	1.3834e-63	4.78872e-62
AT1G47128	RD21	-	1:17282825-17285670	17282825	17285670	2846	1764	-2.87364	1.20828e-31	1.22032e-30
AT1G44830	AT1G44830	-	1:16933792-16934511	16933792	16934511	720	720	-2.8719	8.5803e-13	2.96043e-12
AT4G14695	AT4G14695	-	4:8419799-8421030	8419799	8421030	1232	549	-2.86905	1.32283e-09	3.6197e-09
AT5G18460	AT5G18460	-	5:6122867-6126721	6122867	6126721	3855	1847	-2.86707	1.67949e-77	1.00811e-75
AT3G16180	AT3G16180	-	3:5481325-5485094	5481325	5485094	3770	2079	-2.86422	4.71515e-15	1.90804e-14
AT3G50340	AT3G50340	-	3:18665094-18666672	18665094	18666672	1579	1579	-2.86361	4.90651e-66	1.858e-64
AT1G07370	PCNA1	-	1:2263140-2264551	2263140	2264551	1412	1025	-2.86337	6.04068e-31	5.85963e-30
AT4G34810	AT4G34810	-	4:16599104-16599421	16599104	16599421	318	318	-2.86252	1.07825e-13	3.9729e-13
AT5G55050	AT5G55050	-	5:22337701-22340100	22337701	22340100	2400	1534	-2.86135	7.43985e-58	2.0747e-56
AT1G66470	RHD6	-	1:24795214-24796988	24795214	24796988	1775	1399	-2.86049	4.96276e-17	2.25819e-16
AT3G14310	ATPME3	-	3:4771902-4775119	4771902	4775119	3218	2115	-2.85875	2.72368e-54	6.84031e-53
AT5G39820	anac094	-	5:15939300-15940491	15939300	15940491	1192	1014	-2.85807	2.09134e-18	1.03298e-17
AT5G24330	ATXR6	-	5:8295147-8297068	8295147	8297068	1922	1219	-2.85647	4.36135e-20	2.4102e-19
AT2G40110	AT2G40110	-	2:16747940-16749545	16747940	16749545	1606	871	-2.85632	1.51804e-14	5.91799e-14
AT1G47620	CYP96A8	-	1:17507942-17509702	17507942	17509702	1761	1761	-2.8557	1.11291e-14	4.37793e-14
AT3G20370	AT3G20370	-	3:7105371-7107225	7105371	7107225	1855	1396	-2.85445	4.54488e-76	2.56437e-74
AT1G24575	AT1G24575	-	1:8711036-8711528	8711036	8711528	493	493	-2.85427	1.6775e-09	4.55267e-09
AT3G49260	iqd21	-	3:18262399-18266021	18262399	18266021	3623	1937	-2.85186	3.60355e-19	1.87857e-18
AT5G44635	MCM6	-	5:18006431-18010542	18006431	18010542	4112	2496	-2.85181	6.65046e-34	7.38179e-33
AT4G22010	sks4	-	4:11663324-11666715	11663324	11666715	3392	1983	-2.84513	7.73127e-94	7.93134e-92
AT5G48180	NSP5	-	5:19540937-19542426	19540937	19542426	1490	1395	-2.84437	2.58301e-76	1.47214e-74
AT5G57220	CYP81F2	-	5:23187840-23189857	23187840	23189857	2018	1723	-2.84408	6.0188e-55	1.53666e-53
AT1G29280	WRKY65	-	1:10236367-10237467	10236367	10237467	1101	1002	-2.84395	3.73507e-09	9.85171e-09
AT1G62580	AT1G62580	-	1:23173333-23176931	23173333	23176931	3599	1494	-2.84363	1.75888e-42	2.81139e-41
AT2G42885	AT2G42885	-	2:17845967-17846603	17845967	17846603	637	398	-2.84271	4.16611e-08	1.01234e-07
AT1G02205	CER1	-	1:418748-422438	418748	422438	3691	2392	-2.8427	3.44777e-19	1.80069e-18
AT1G11580	ATPMEPCRA	-	1:3888690-3890811	3888690	3890811	2122	1876	-2.84269	1.02715e-60	3.2317e-59
AT5G36000	AT5G36000	AT5G36001	5:14139996-14141892	14139996	14141892	1897	1068	-2.84215	1.95341e-09	5.27023e-09
AT2G22482	AT2G22482	-	2:9549649-9550084	9549649	9550084	436	436	-2.83639	1.05643e-11	3.37784e-11
AT3G56220	AT3G56220	-	3:20858918-20860531	20858918	20860531	1614	723	-2.83359	1.25205e-20	7.14306e-20
AT2G30890	AT2G30890	AT2G30900	2:13147621-13149819	13147621	13149819	2199	1083	-2.83238	4.46002e-12	1.46166e-11
AT3G14370	WAG2	-	3:4797845-4799504	4797845	4799504	1660	1660	-2.83178	2.76797e-14	1.05931e-13
AT5G48900	AT5G48900	-	5:19825137-19829092	19825137	19829092	3956	1540	-2.82666	8.2666e-20	4.47915e-19
AT3G29760	AT3G29760	-	3:11589505-11591833	11589505	11591833	2329	1862	-2.82312	1.41016e-25	1.05993e-24
AT1G04770	AT1G04770	-	1:1336371-1337849	1336371	1337849	1479	1187	-2.81948	1.63738e-107	2.59027e-105
AT1G78670	ATGGH3	-	1:29590945-29593499	29590945	29593499	2555	1347	-2.81891	4.97565e-50	1.06882e-48
AT1G29640	AT1G29640	-	1:10355703-10356482	10355703	10356482	780	780	-2.81569	2.90274e-13	1.0366e-12
AT5G67280	RLK	-	5:26842270-26845190	26842270	26845190	2921	2480	-2.81396	8.50118e-88	7.34181e-86
AT5G49890	CLC-C	-	5:20288119-20292350	20288119	20292350	4232	2836	-2.81052	5.18148e-39	7.23654e-38
AT2G37560	ATORC2	-	2:15758645-15761262	15758645	15761262	2618	1507	-2.81	1.75762e-18	8.73239e-18
AT5G54510	GH3.6	-	5:22131093-22133678	22131093	22133678	2586	2181	-2.80909	1.22271e-55	3.18904e-54
AT3G11720	AT3G11720	-	3:3705865-3708721	3705865	3708721	2857	2095	-2.80852	1.32168e-50	2.90545e-49
AT5G37770	TCH2	-	5:14998854-14999619	14998854	14999619	766	766	-2.80836	1.71456e-49	3.62327e-48
AT5G52910	ATIM	-	5:21457627-21463159	21457627	21463159	5533	3573	-2.80752	2.82122e-25	2.0881e-24
AT3G04290	ATLTL1	-	3:1133320-1136316	1133320	1136316	2997	1494	-2.80563	4.6526e-21	2.71661e-20
AT5G67080	MAPKKK19	-	5:26772726-26773760	26772726	26773760	1035	1035	-2.80409	1.73221e-39	2.4619e-38
AT3G23410	ATFAO3	-	3:8382805-8386148	8382805	8386148	3344	2420	-2.80349	1.95462e-32	2.03857e-31
AT5G59240	AT5G59240	-	5:23902465-23903733	23902465	23903733	1269	857	-2.80186	3.03936e-42	4.8262e-41
AT4G30800	AT4G30800	-	4:15001134-15002671	15001134	15002671	1538	841	-2.80177	1.63889e-74	8.66923e-73
AT1G14440	AtHB31	-	1:4938824-4940903	4938824	4940903	2080	1577	-2.80111	1.88064e-80	1.25329e-78
AT5G10572	SNOR77	-	5:3343593-3343725	3343593	3343725	133	133	-2.80029	2.85142e-28	2.43645e-27
AT2G37450	AT2G37450	-	2:15722568-15725062	15722568	15725062	2495	1482	-2.79876	3.64025e-23	2.39203e-22
AT1G70410	ATBCA4	-	1:26533926-26538333	26533926	26538333	4408	1745	-2.79819	2.14274e-62	7.19648e-61
AT4G28310	AT4G28310	-	4:14017408-14018208	14017408	14018208	801	801	-2.79789	1.54206e-33	1.68078e-32
AT5G11740	AGP15	-	5:3784251-3784792	3784251	3784792	542	542	-2.79686	2.86863e-51	6.43995e-50
AT3G15350	AT3G15350	-	3:5166206-5169151	5166206	5169151	2946	2068	-2.7957	1.00913e-54	2.55331e-53
AT1G66150	TMK1	-	1:24631409-24634749	24631409	24634749	3341	3257	-2.79399	3.81532e-89	3.43521e-87
AT4G31500	CYP83B1	-	4:15273471-15275310	15273471	15275310	1840	1745	-2.7939	1.13981e-57	3.14227e-56
AT1G05135	AT1G05135	-	1:1477500-1478821	1477500	1478821	1322	1322	-2.79347	1.7088e-08	4.28198e-08
AT2G44500	AT2G44500	-	2:18374292-18376790	18374292	18376790	2499	2311	-2.79062	1.07465e-20	6.15173e-20
AT3G61490	AT3G61490	-	3:22758063-22760340	22758063	22760340	2278	1777	-2.78686	2.35011e-50	5.11315e-49
AT1G78260	AT1G78260	-	1:29446985-29450515	29446985	29450515	3531	2417	-2.78289	2.21337e-26	1.72653e-25
AT3G04070	NAC047	-	3:1061526-1063103	1061526	1063103	1578	1254	-2.77802	5.24634e-21	3.05381e-20
AT3G06778	AT3G06778	-	3:2140103-2141533	2140103	2141533	1431	932	-2.77288	1.37667e-15	5.75663e-15
AT5G13060	ABAP1	-	5:4142958-4147091	4142958	4147091	4134	2353	-2.77232	4.37475e-18	2.12182e-17
AT1G64970	VTE4	-	1:24134085-24136109	24134085	24136109	2025	1415	-2.76735	7.32444e-72	3.49242e-70
AT2G40260	AT2G40260	-	2:16816818-16818473	16816818	16818473	1656	1233	-2.76439	5.82508e-22	3.56089e-21
AT1G75780	TUB1	-	1:28451141-28453640	28451141	28453640	2500	1619	-2.76429	3.199e-54	8.01027e-53
AT3G06070	AT3G06070	-	3:1831057-1831923	1831057	1831923	867	781	-2.76349	7.28971e-14	2.71911e-13
AT5G13870	EXGT-A4	-	5:4474976-4477045	4474976	4477045	2070	1392	-2.75914	6.0471e-80	3.92181e-78
AT2G43340	AT2G43340	-	2:18007697-18008665	18007697	18008665	969	891	-2.75841	1.67998e-61	5.46866e-60
AT5G19110	AT5G19110	-	5:6411561-6413170	6411561	6413170	1610	1377	-2.75279	1.0447e-15	4.39238e-15
AT4G32460	AT4G32460	-	4:15662266-15665013	15662266	15665013	2748	1506	-2.75272	1.44398e-82	1.01843e-80
AT4G13890	SHM5	-	4:8031972-8033723	8031972	8033723	1752	1592	-2.75229	0.000174845	0.000305397
AT5G12940	AT5G12940	-	5:4087712-4089004	4087712	4089004	1293	1293	-2.75134	6.9812e-16	2.96912e-15
AT4G30450	AT4G30450	-	4:14886027-14886675	14886027	14886675	649	649	-2.75087	5.54013e-20	3.03881e-19
AT1G65340	CYP96A3	-	1:24268135-24269646	24268135	24269646	1512	1512	-2.74397	1.95036e-39	2.76497e-38
AT3G51600	LTP5	-	3:19138394-19139252	19138394	19139252	859	752	-2.74166	6.46152e-43	1.04966e-41
AT1G65590	HEXO3	-	1:24385900-24391207	24385900	24391207	5308	1922	-2.74128	1.41178e-40	2.10549e-39
AT3G13520	AGP12	-	3:4408925-4409440	4408925	4409440	516	516	-2.74018	1.97309e-19	1.04501e-18
AT3G16460	AT3G16460	-	3:5592582-5595717	5592582	5595717	3136	2510	-2.73761	7.8646e-65	2.85062e-63
AT3G07130	ATPAP15	-	3:2255710-2258005	2255710	2258005	2296	1676	-2.73087	1.73776e-103	2.431e-101
AT2G16850	PIP3B	-	2:7301581-7303437	7301581	7303437	1857	1160	-2.73076	2.54158e-79	1.61129e-77
AT3G23880	AT3G23880	-	3:8621986-8623162	8621986	8623162	1177	1177	-2.73013	1.26604e-20	7.22047e-20
AT1G14345	AT1G14345	-	1:4899145-4899979	4899145	4899979	835	835	-2.72829	3.5045e-09	9.26452e-09
AT5G57685	ATGDU3	-	5:23366004-23366867	23366004	23366867	864	864	-2.7224	3.07069e-46	5.6993e-45
AT4G01883	AT4G01883	-	4:813068-815170	813068	815170	2103	1139	-2.72106	3.05441e-17	1.40954e-16
AT3G61550	AT3G61550	-	3:22776401-22777225	22776401	22777225	825	825	-2.71838	2.07395e-31	2.06748e-30
AT5G46690	bHLH071	-	5:18945615-18947637	18945615	18947637	2023	1211	-2.71785	3.77898e-24	2.62589e-23
AT5G15230	GASA4	-	5:4944900-4946216	4944900	4946216	1317	681	-2.71779	5.23553e-31	5.09907e-30
AT5G04530	KCS19	-	5:1291822-1293688	1291822	1293688	1867	1867	-2.71668	1.3555e-13	4.9567e-13
AT3G12110	ACT11	-	3:3857843-3859798	3857843	3859798	1956	1434	-2.71582	1.4891e-22	9.43337e-22
AT5G46530	AT5G46530	-	5:18875525-18876898	18875525	18876898	1374	644	-2.71058	4.88387e-08	1.17998e-07
AT3G18880	AT3G18880	-	3:6509540-6510625	6509540	6510625	1086	568	-2.71045	6.84478e-14	2.55709e-13
AT2G22770	NAI1	-	2:9684725-9686595	9684725	9686595	1871	1370	-2.70985	3.01806e-90	2.79163e-88
AT1G64625	AT1G64625	-	1:24016643-24019271	24016643	24019271	2629	1909	-2.70264	1.2677e-16	5.6425e-16
AT4G28890	AT4G28890	-	4:14256333-14257735	14256333	14257735	1403	1403	-2.70133	8.48265e-24	5.78043e-23
AT2G46650	B5.N1	-	2:19151646-19152600	19151646	19152600	955	766	-2.69973	1.15215e-10	3.42089e-10
AT4G10265	AT4G10265	-	4:6373097-6373536	6373097	6373536	440	440	-2.6989	7.73916e-24	5.29082e-23
AT3G30214	AT3G30214	-	3:11860800-11861666	11860800	11861666	867	867	-2.69753	1.53793e-18	7.67015e-18
AT5G07680	ANAC079	-	5:2435875-2437499	2435875	2437499	1625	1384	-2.69687	8.01069e-35	9.29383e-34
AT1G72130	AT1G72130	-	1:27137181-27139384	27137181	27139384	2204	1883	-2.69586	5.26635e-27	4.21483e-26
AT3G05625	AT3G05625	-	3:1632284-1634139	1632284	1634139	1856	1125	-2.69521	1.39576e-14	5.46139e-14
AT5G46790	PYL1	-	5:18983870-18984759	18983870	18984759	890	890	-2.69418	7.97498e-29	6.99443e-28
AT4G09649	AT4G09649	-	4:6100561-6100698	6100561	6100698	138	138	-2.69405	6.93137e-05	0.000126458
AT4G39510	CYP96A12	-	4:18368803-18370652	18368803	18370652	1850	1850	-2.68907	3.03695e-46	5.64287e-45
AT4G29530	AT4G29530	-	4:14496079-14497454	14496079	14497454	1376	967	-2.68839	2.79511e-14	1.06922e-13
AT1G68590	AT1G68590	-	1:25757404-25758232	25757404	25758232	829	753	-2.6878	3.55725e-94	3.6994e-92
AT4G03070	AOP1	-	4:1358432-1359698	1358432	1359698	1267	1057	-2.68757	5.00471e-22	3.07048e-21
AT2G06850	EXGT-A1	-	2:2763526-2765720	2763526	2765720	2195	1214	-2.68507	4.72366e-42	7.45176e-41
AT4G34710	ATADC2	-	4:16560062-16562969	16560062	16562969	2908	2908	-2.68371	6.32183e-79	3.94869e-77
AT5G61000	RPA70D	-	5:24549578-24552723	24549578	24552723	3146	2076	-2.68149	4.31734e-45	7.66033e-44
AT5G43830	AT5G43830	-	5:17622336-17624329	17622336	17624329	1994	1103	-2.68081	2.80206e-88	2.45754e-86
AT1G04490	AT1G04490	-	1:1217948-1220137	1217948	1220137	2190	1620	-2.68051	5.8879e-19	3.02013e-18
AT5G25610	RD22	-	5:8914233-8916800	8914233	8916800	2568	1560	-2.6784	1.37857e-45	2.50108e-44
AT1G78680	ATGGH2	-	1:29593756-29596270	29593756	29596270	2515	1481	-2.67613	4.88442e-21	2.84706e-20
AT2G36885	AT2G36885	-	2:15482003-15483711	15482003	15483711	1709	970	-2.67435	2.3792e-21	1.41308e-20
AT1G05805	AT1G05805	-	1:1744773-1747693	1744773	1747693	2921	1425	-2.67364	2.61664e-14	1.00299e-13
AT5G38420	AT5G38420	-	5:15380945-15382035	15380945	15382035	1091	861	-2.67238	2.87665e-14	1.09892e-13
AT2G28605	AT2G28605	-	2:12254888-12255837	12254888	12255837	950	870	-2.67097	6.40632e-23	4.1516e-22
AT4G22810	AT4G22810	-	4:11984140-11985702	11984140	11985702	1563	1563	-2.66813	9.46098e-36	1.14472e-34
AT4G03210	XTH9	-	4:1415949-1417352	1415949	1417352	1404	1102	-2.66719	3.89489e-63	1.3373e-61
AT5G51850	AT5G51850	-	5:21079252-21081578	21079252	21081578	2327	2040	-2.66684	1.49216e-16	6.59815e-16
AT5G56580	ATMKK6	-	5:22904689-22906661	22904689	22906661	1973	1274	-2.66547	3.08188e-13	1.09779e-12
AT2G42485	AT2G42485	-	2:17690531-17691018	17690531	17691018	488	488	-2.66065	1.88904e-11	5.92803e-11
AT3G50825	AT3G50825	-	3:18893404-18893484	18893404	18893484	81	81	-2.65943	9.65555e-21	5.5422e-20
AT3G23730	XTH16	-	3:8550110-8551335	8550110	8551335	1226	1075	-2.65794	1.84384e-54	4.65136e-53
AT4G04640	ATPC1	-	4:2350498-2352018	2350498	2352018	1521	1521	-2.6573	1.00627e-81	6.95232e-80
AT5G45680	ATFKBP13	-	5:18530880-18532337	18530880	18532337	1458	850	-2.65617	1.15917e-23	7.8485e-23
AT4G02100	AT4G02100	-	4:930065-932330	930065	932330	2266	2085	-2.65482	7.61756e-18	3.64759e-17
AT3G01516	AT3G01516	-	3:207336-208086	207336	208086	751	751	-2.65331	6.11838e-15	2.45126e-14
AT5G63990	AT5G63990	-	5:25613258-25615880	25613258	25615880	2623	1436	-2.65321	2.03836e-21	1.21277e-20
AT5G41880	POLA3	-	5:16760908-16764276	16760908	16764276	3369	1620	-2.65114	1.35436e-27	1.12214e-26
AT3G22550	AT3G22550	-	3:7991646-7993454	7991646	7993454	1809	1483	-2.65071	1.56682e-29	1.41675e-28
AT5G08020	ATRPA70B	-	5:2572107-2574879	2572107	2574879	2773	1815	-2.64848	4.95554e-18	2.39733e-17
AT1G69526	AT1G69526	-	1:26131294-26133196	26131294	26133196	1903	1556	-2.64441	3.63029e-36	4.45935e-35
AT3G02550	LBD41	-	3:536505-537998	536505	537998	1494	1382	-2.64225	1.94492e-91	1.88124e-89
AT5G18860	AT5G18860	-	5:6290676-6295811	6290676	6295811	5136	3250	-2.63798	1.05274e-19	5.66424e-19
AT2G31270	CDT1	-	2:13329009-13331830	13329009	13331830	2822	2030	-2.63749	8.92464e-45	1.56872e-43
AT4G02555	AT4G02555	-	4:1122603-1122678	1122603	1122678	76	76	-2.63566	9.13841e-13	3.14658e-12
AT1G15980	NDF1	-	1:5489298-5491363	5489298	5491363	2066	1566	-2.6344	3.78744e-14	1.43744e-13
AT3G59780	AT3G59780	-	3:22086478-22090444	22086478	22090444	3967	2504	-2.63379	1.16702e-52	2.74745e-51
AT1G74940	AT1G74940	-	1:28146059-28147378	28146059	28147378	1320	1207	-2.63062	7.96939e-42	1.24905e-40
AT3G12170	AT3G12170	-	3:3881000-3882804	3881000	3882804	1805	959	-2.62874	5.28249e-14	1.98571e-13
AT3G23740	AT3G23740	-	3:8551772-8554745	8551772	8554745	2974	2021	-2.62765	1.45939e-19	7.79525e-19
AT5G16590	LRR1	-	5:5431681-5434134	5431681	5434134	2454	2272	-2.6259	5.12724e-36	6.26634e-35
AT5G55730	FLA1	-	5:22558148-22560461	22558148	22560461	2314	1571	-2.62538	8.60263e-35	9.97374e-34
AT1G64390	AtGH9C2	-	1:23911119-23915229	23911119	23915229	4111	2660	-2.62502	3.8013e-83	2.73807e-81
AT5G46110	TPT	-	5:18697235-18700656	18697235	18700656	3422	2059	-2.62147	2.18434e-15	9.02472e-15
AT1G74100	ATSOT16	-	1:27864345-27865694	27864345	27865694	1350	1350	-2.61447	3.43268e-73	1.71908e-71
AT4G21280	PSBQA	-	4:11334402-11335773	11334402	11335773	1372	905	-2.61442	2.60043e-62	8.6991e-61
AT2G35190	ATNPSN11	-	2:14830626-14833319	14830626	14833319	2694	1599	-2.61435	2.2728e-33	2.46455e-32
AT4G25050	ACP4	-	4:12870006-12871316	12870006	12871316	1311	914	-2.60107	4.63791e-77	2.71647e-75
AT1G61260	AT1G61260	-	1:22593465-22595069	22593465	22595069	1605	1409	-2.59903	8.68361e-27	6.90406e-26
AT5G01820	CIPK14	-	5:313193-315000	313193	315000	1808	1808	-2.59371	8.05117e-25	5.8315e-24
AT1G60600	ABC4	-	1:22324645-22327359	22324645	22327359	2715	1742	-2.59095	1.42982e-59	4.29884e-58
AT1G55200	AT1G55200	-	1:20589129-20592063	20589129	20592063	2935	2225	-2.5906	4.02413e-83	2.88629e-81
AT5G10280	MYB92	AT5G10278	5:3232569-3234210	3232569	3234210	1642	1466	-2.59029	1.06148e-14	4.18241e-14
AT4G21990	PRH26	-	4:11657008-11659167	11657008	11659167	2160	1827	-2.58933	4.83922e-96	5.49755e-94
AT3G22100	AT3G22100	-	3:7783711-7784469	7783711	7784469	759	759	-2.58841	4.69014e-17	2.13644e-16
AT4G16410	AT4G16410	-	4:9261866-9262601	9261866	9262601	736	736	-2.58801	1.83511e-53	4.45667e-52
AT2G47485	AT2G47485	-	2:19485875-19486553	19485875	19486553	679	679	-2.58509	5.86538e-12	1.90856e-11
AT1G14180	AT1G14180	-	1:4847162-4849207	4847162	4849207	2046	1611	-2.58475	2.3683e-24	1.66895e-23
AT5G03870	AT5G03870	-	5:1035658-1036967	1035658	1036967	1310	1310	-2.58402	2.18402e-10	6.37066e-10
AT1G49975	AT1G49975	-	1:18504802-18505597	18504802	18505597	796	599	-2.58339	7.36328e-50	1.57371e-48
AT4G24780	AT4G24780	-	4:12770331-12772479	12770331	12772479	2149	1689	-2.58303	2.79381e-14	1.06896e-13
AT1G71970	AT1G71970	-	1:27093028-27094027	27093028	27094027	1000	1000	-2.58162	4.675e-17	2.13012e-16
AT2G24790	ATCOL3	-	2:10566898-10568145	10566898	10568145	1248	1231	-2.58064	3.02498e-45	5.40124e-44
AT5G05365	AT5G05365	-	5:1590036-1590861	1590036	1590861	826	512	-2.58038	4.81074e-15	1.94533e-14
AT1G14460	AT1G14460	-	1:4948748-4952927	4948748	4952927	4180	3742	-2.57985	1.00714e-13	3.72143e-13
AT1G48267	MIR161	-	1:17825730-17825819	17825730	17825819	90	90	-2.57914	7.84812e-05	0.000142354
AT5G26230	AT5G26230	-	5:9173517-9174542	9173517	9174542	1026	1026	-2.57681	1.41134e-10	4.16576e-10
AT1G60660	B5.N5	-	1:22342414-22343014	22342414	22343014	601	601	-2.57677	3.21831e-32	3.32173e-31
AT5G13730	SIG4	-	5:4429110-4430837	4429110	4430837	1728	1375	-2.57582	4.40765e-28	3.73228e-27
AT3G57630	AT3G57630	-	3:21339302-21343796	21339302	21343796	4495	2946	-2.57209	4.1467e-65	1.5259e-63
AT5G66920	sks17	-	5:26722823-26725626	26722823	26725626	2804	2037	-2.56743	7.16599e-61	2.27577e-59
AT2G03420	AT2G03420	-	2:1034998-1035969	1034998	1035969	972	647	-2.56489	1.16478e-43	1.95598e-42
AT3G12610	DRT100	-	3:4006399-4007807	4006399	4007807	1409	1409	-2.56462	4.94028e-48	9.88466e-47
AT5G26290	AT5G26290	-	5:9226079-9227873	9226079	9227873	1795	1002	-2.56338	4.82474e-15	1.95052e-14
AT5G67110	ALC	-	5:26785106-26786383	26785106	26786383	1278	982	-2.55958	1.10621e-64	3.98402e-63
AT5G57980	RPB5C	-	5:23469050-23469768	23469050	23469768	719	633	-2.55737	3.46642e-27	2.80747e-26
AT3G27640	AT3G27640	-	3:10232248-10235621	10232248	10235621	3374	1821	-2.55623	1.24388e-16	5.54231e-16
AT4G35640	ATSERAT3;2	-	4:16905579-16908357	16905579	16908357	2779	1624	-2.55513	3.85518e-37	4.95495e-36
AT2G40475	AT2G40475	-	2:16906911-16908128	16906911	16908128	1218	1218	-2.5516	2.24985e-28	1.93414e-27
AT1G79110	AT1G79110	-	1:29759157-29760704	29759157	29760704	1548	1383	-2.54752	1.01675e-17	4.83442e-17
AT2G38120	AUX1	-	2:15972993-15977180	15972993	15977180	4188	2135	-2.54421	4.74966e-110	8.12097e-108
AT1G54010	AT1G54010	-	1:20158664-20160815	20158664	20160815	2152	1419	-2.54192	1.39151e-53	3.39885e-52
AT1G53300	TTL1	-	1:19879422-19882375	19879422	19882375	2954	2404	-2.5406	2.05429e-32	2.13724e-31
AT4G21870	AT4G21870	-	4:11603568-11604331	11603568	11604331	764	639	-2.54057	1.68148e-25	1.25606e-24
AT1G25450	KCS5	-	1:8938479-8940387	8938479	8940387	1909	1784	-2.54013	1.29053e-19	6.91074e-19
AT4G21865	AT4G21865	-	4:11601905-11603276	11601905	11603276	1372	783	-2.53949	2.0511e-11	6.42826e-11
AT3G12710	AT3G12710	-	3:4040324-4041982	4040324	4041982	1659	1341	-2.53918	4.33949e-12	1.42354e-11
AT1G30690	AT1G30690	-	1:10887607-10890332	10887607	10890332	2726	2122	-2.53532	1.6533e-62	5.60829e-61
AT1G78170	AT1G78170	-	1:29414059-29415094	29414059	29415094	1036	920	-2.53334	1.83783e-62	6.20936e-61
AT4G34250	KCS16	-	4:16394708-16396495	16394708	16396495	1788	1788	-2.53219	8.40154e-41	1.26075e-39
AT3G01510	LSF1	-	3:198679-201742	198679	201742	3064	2012	-2.5293	2.9946e-17	1.38385e-16
AT5G27930	AT5G27930	-	5:9958090-9961264	9958090	9961264	3175	1583	-2.5255	1.98204e-20	1.1187e-19
AT3G05150	AT3G05150	-	3:1440073-1443530	1440073	1443530	3458	1640	-2.52329	1.72424e-24	1.2258e-23
AT3G59550	ATRAD21.2	-	3:21997054-22000678	21997054	22000678	3625	2472	-2.52058	2.52563e-17	1.17223e-16
AT1G66270	BGLU21	-	1:24699990-24703041	24699990	24703041	3052	1741	-2.51853	1.13601e-30	1.08886e-29
AT4G39500	CYP96A11	-	4:18366950-18368359	18366950	18368359	1410	1410	-2.51338	1.54074e-85	1.21303e-83
AT5G49170	AT5G49170	-	5:19938576-19939571	19938576	19939571	996	910	-2.51185	1.06716e-22	6.82424e-22
AT3G50820	PSBO2	-	3:18890876-18892426	18890876	18892426	1551	1243	-2.51024	5.38027e-30	4.98205e-29
AT3G43960	AT3G43960	-	3:15774055-15775657	15774055	15775657	1603	1227	-2.50476	5.77028e-15	2.31783e-14
AT2G41090	AT2G41090	-	2:17135721-17136852	17135721	17136852	1132	912	-2.50289	3.37448e-10	9.70271e-10
AT1G15210	PDR7	-	1:5231348-5236573	5231348	5236573	5226	4533	-2.50275	1.31886e-72	6.48964e-71
AT3G14067	AT3G14067	-	3:4658198-4660784	4658198	4660784	2587	2587	-2.50253	6.87456e-64	2.41423e-62
AT2G32390	GLR3.5	-	2:13748441-13751933	13748441	13751933	3493	2940	-2.50241	7.45058e-40	1.07976e-38
AT1G53920	GLIP5	-	1:20137712-20139637	20137712	20139637	1926	1171	-2.49946	9.02382e-09	2.31364e-08
AT2G41940	ZFP8	-	2:17507509-17508616	17507509	17508616	1108	1108	-2.49772	6.2808e-14	2.35106e-13
AT4G18480	CHL11	-	4:10201672-10203469	10201672	10203469	1798	1608	-2.4974	6.2263e-80	4.02262e-78
AT1G30520	AAE14	-	1:10810984-10813700	10810984	10813700	2717	1892	-2.49732	3.30314e-27	2.67651e-26
AT5G26790	AT5G26790	-	5:9423092-9423611	9423092	9423611	520	520	-2.4973	4.34025e-07	9.69354e-07
AT4G23690	AT4G23690	-	4:12338871-12339747	12338871	12339747	877	877	-2.49698	1.11029e-06	2.39108e-06
AT4G01360	AT4G01360	-	4:564760-566310	564760	566310	1551	1386	-2.49564	1.51696e-09	4.13021e-09
AT2G40970	MYBC1	-	2:17097550-17098695	17097550	17098695	1146	1146	-2.49543	4.24537e-15	1.72247e-14
AT2G22170	AT2G22170	-	2:9426849-9427817	9426849	9427817	969	788	-2.49538	1.24475e-36	1.55957e-35
AT2G41540	GPDHC1	-	2:17326093-17328902	17326093	17328902	2810	2112	-2.49168	6.1687e-54	1.5333e-52
AT4G16447	AT4G16447	-	4:9278787-9279389	9278787	9279389	603	603	-2.49128	9.72968e-22	5.87774e-21
AT1G68430	AT1G68430	-	1:25654905-25655444	25654905	25655444	540	540	-2.48764	3.07096e-06	6.3509e-06
AT2G28200	AT2G28200	-	2:12024149-12025306	12024149	12025306	1158	1158	-2.48684	4.15577e-14	1.57441e-13
AT1G23040	AT1G23040	-	1:8164959-8165862	8164959	8165862	904	904	-2.48504	3.84992e-36	4.72228e-35
AT2G19670	ATPRMT1A	-	2:8499086-8501181	8499086	8501181	2096	1360	-2.48025	2.73076e-65	1.0159e-63
AT3G14225	GLIP4	-	3:4734616-4735993	4734616	4735993	1378	1134	-2.47913	3.78833e-06	7.78121e-06
AT3G48460	AT3G48460	-	3:17949445-17951195	17949445	17951195	1751	1310	-2.47588	9.71412e-49	2.01016e-47
AT5G20700	AT5G20700	-	5:7005844-7007117	7005844	7007117	1274	1195	-2.47582	4.89779e-23	3.19972e-22
AT1G72430	AT1G72430	-	1:27264911-27265630	27264911	27265630	720	720	-2.47469	3.93275e-69	1.7113e-67
AT1G62440	LRX2	-	1:23111818-23115293	23111818	23115293	3476	2481	-2.47246	1.45094e-17	6.82984e-17
AT2G26500	AT2G26500	-	2:11270089-11270953	11270089	11270953	865	769	-2.47227	1.06521e-90	1.01297e-88
AT2G45830	DTA2	-	2:18866061-18868542	18866061	18868542	2482	2136	-2.47151	3.05466e-31	3.01143e-30
AT1G26570	ATUGD1	-	1:9182204-9184393	9182204	9184393	2190	1712	-2.47145	7.47856e-22	4.54541e-21
AT2G40010	AT2G40010	-	2:16708379-16710448	16708379	16710448	2070	1153	-2.47092	3.14806e-81	2.14868e-79
AT1G05210	AT1G05210	-	1:1510404-1511683	1510404	1511683	1280	770	-2.46901	4.73253e-15	1.91416e-14
AT3G23470	AT3G23470	-	3:8414710-8418165	8414710	8418165	3456	1467	-2.46761	1.65914e-16	7.31552e-16
AT4G39920	TFC.C	-	4:18515749-18517274	18515749	18517274	1526	1526	-2.4674	1.06667e-39	1.53534e-38
AT1G12800	AT1G12800	-	1:4361551-4365331	4361551	4365331	3781	2673	-2.46725	1.41137e-53	3.44241e-52
AT1G70895	CLE17	-	1:26727899-26729137	26727899	26729137	1239	1048	-2.46565	2.08448e-14	8.0502e-14
AT2G33180	AT2G33180	-	2:14066463-14067467	14066463	14067467	1005	670	-2.46554	2.47118e-50	5.36967e-49
AT4G21940	CPK15	-	4:11640802-11643762	11640802	11643762	2961	2085	-2.46429	1.05757e-13	3.90096e-13
AT1G35420	AT1G35420	-	1:13026238-13027684	13026238	13027684	1447	1251	-2.46418	2.12353e-12	7.12629e-12
AT2G03850	AT2G03850	-	2:1175581-1176702	1175581	1176702	1122	753	-2.46354	0.000160434	0.00028127
AT5G01870	AT5G01870	-	5:337177-337820	337177	337820	644	550	-2.46337	3.42384e-38	4.59234e-37
AT2G27770	AT2G27770	-	2:11832809-11834369	11832809	11834369	1561	1561	-2.46314	3.10055e-13	1.10421e-12
AT2G14890	AGP9	-	2:6399621-6401059	6399621	6401059	1439	1439	-2.46188	1.43989e-25	1.08132e-24
AT5G02244	AT5G02244	-	5:453814-454294	453814	454294	481	324	-2.46058	2.80368e-06	5.81235e-06
AT4G19020	CMT2	-	4:10414526-10421209	10414526	10421209	6684	4161	-2.46012	1.21864e-29	1.10605e-28
AT5G65420	CYCD4;1	-	5:26141470-26143993	26141470	26143993	2524	1745	-2.45931	2.24791e-22	1.41084e-21
AT4G36920	AP2	-	4:17400610-17403469	17400610	17403469	2860	1872	-2.45888	1.97558e-15	8.19022e-15
AT1G80690	AT1G80690	-	1:30329068-30330803	30329068	30330803	1736	1178	-2.45875	3.56514e-21	2.09539e-20
AT3G21055	PSBTN	-	3:7376635-7377186	7376635	7377186	552	552	-2.45773	3.44464e-41	5.24348e-40
AT2G34020	AT2G34020	-	2:14371185-14373855	14371185	14373855	2671	2092	-2.45631	2.38583e-88	2.11439e-86
AT5G45340	CYP707A3	-	5:18368642-18370991	18368642	18370991	2350	1902	-2.45455	1.5004e-22	9.50141e-22
AT2G04780	FLA7	-	2:1676742-1678455	1676742	1678455	1714	1714	-2.45454	8.79573e-47	1.68042e-45
AT5G52220	AT5G52220	-	5:21207097-21207716	21207097	21207716	620	476	-2.45438	9.39631e-12	3.01805e-11
AT5G62340	AT5G62340	-	5:25033518-25034404	25033518	25034404	887	887	-2.4531	4.23238e-14	1.602e-13
AT5G24660	LSU2	-	5:8443279-8443834	8443279	8443834	556	556	-2.45289	2.16366e-18	1.06776e-17
AT2G47720	AT2G47720	AT2G47730	2:19556624-19557139	19556624	19557139	516	219	-2.45225	8.40496e-05	0.000152015
AT1G35780	AT1G35780	-	1:13277274-13280289	13277274	13280289	3016	1541	-2.45196	2.84664e-21	1.68303e-20
AT4G36808	AT4G36808	-	4:17343162-17343824	17343162	17343824	663	403	-2.45195	7.93097e-10	2.2102e-09
AT1G73220	AtOCT1	-	1:27538276-27540235	27538276	27540235	1960	1857	-2.45156	5.45831e-91	5.24959e-89
AT5G67420	LBD37	-	5:26904289-26906026	26904289	26906026	1738	1651	-2.44877	2.16572e-11	6.77243e-11
AT4G02810	AT4G02810	-	4:1256162-1257212	1256162	1257212	1051	1051	-2.44866	1.32445e-11	4.20382e-11
AT5G15350	AtENODL17	-	5:4984959-4986239	4984959	4986239	1281	829	-2.44762	1.21738e-63	4.23134e-62
AT5G13180	NAC083	-	5:4196572-4197848	4196572	4197848	1277	1101	-2.44485	2.51738e-28	2.15865e-27
AT5G13400	AT5G13400	-	5:4296688-4299223	4296688	4299223	2536	2185	-2.44479	9.14511e-54	2.25655e-52
AT4G10770	ATOPT7	-	4:6628404-6632599	6628404	6632599	4196	2625	-2.44313	1.48561e-16	6.57266e-16
AT5G09650	AtPPa6	-	5:2991149-2993213	2991149	2993213	2065	1181	-2.44129	3.55413e-66	1.35497e-64
AT5G13100	AT5G13100	-	5:4156660-4158553	4156660	4158553	1894	1512	-2.43932	1.0068e-32	1.06133e-31
AT2G40008	AT2G40008	-	2:16708056-16709436	16708056	16709436	1381	1296	-2.43926	1.16838e-71	5.53981e-70
AT5G06480	AT5G06480	-	5:1976086-1977290	1976086	1977290	1205	654	-2.43808	7.84068e-07	1.7114e-06
AT3G56370	AT3G56370	-	3:20899099-20902981	20899099	20902981	3883	3416	-2.43749	1.09161e-48	2.25064e-47
AT2G46420	AT2G46420	-	2:19053686-19057096	19053686	19057096	3411	1900	-2.43654	5.74707e-72	2.76366e-70
AT4G23250	CRK17	-	4:12162004-12167026	12162004	12167026	5023	3108	-2.43538	3.72047e-65	1.37203e-63
AT1G47760	AGL102	-	1:17572451-17573159	17572451	17573159	709	555	-2.43244	2.48955e-13	8.92432e-13
AT4G29210	GGT3	-	4:14400920-14403519	14400920	14403519	2600	2295	-2.43235	2.63794e-53	6.36981e-52
AT5G57030	LUT2	-	5:23077265-23080053	23077265	23080053	2789	1943	-2.432	1.06683e-27	8.88259e-27
AT2G39415	AT2G39415	-	2:16458607-16458966	16458607	16458966	360	360	-2.43185	2.21688e-13	7.97729e-13
AT4G19985	AT4G19985	-	4:10830237-10832094	10830237	10832094	1858	1121	-2.43117	3.65779e-25	2.69197e-24
AT2G03410	AT2G03410	-	2:1033598-1036009	1033598	1036009	2412	2412	-2.43002	7.5979e-48	1.51305e-46
AT5G06610	AT5G06610	-	5:2029897-2033723	2029897	2033723	3827	1266	-2.42952	2.46343e-15	1.01506e-14
AT1G48480	RKL1	-	1:17918391-17920985	17918391	17920985	2595	2294	-2.42914	2.20772e-18	1.08887e-17
AT5G57567	AT5G57567	-	5:23312045-23312399	23312045	23312399	355	253	-2.42791	1.26321e-09	3.46217e-09
AT1G17285	AT1G17285	-	1:5920774-5921415	5920774	5921415	642	537	-2.42758	1.37334e-14	5.37615e-14
AT1G06475	AT1G06475	-	1:1973834-1974386	1973834	1974386	553	553	-2.42241	2.34085e-08	5.80309e-08
AT3G53420	PIP2	-	3:19803655-19805713	19803655	19805713	2059	1374	-2.41687	8.48942e-44	1.43557e-42
AT4G04610	APR1	-	4:2325003-2327013	2325003	2327013	2011	1759	-2.41344	2.42534e-49	5.09984e-48
AT2G19880	AT2G19880	-	2:8581358-8585478	8581358	8585478	4121	2143	-2.4094	7.10137e-37	9.01762e-36
AT1G02620	AT1G02620	-	1:557092-557986	557092	557986	895	687	-2.40741	5.93695e-10	1.67547e-09
AT4G21780	AT4G21780	-	4:11567130-11567699	11567130	11567699	570	570	-2.40671	3.72114e-07	8.35381e-07
AT1G51070	bHLH115	-	1:18927877-18929762	18927877	18929762	1886	1269	-2.40619	7.1119e-68	2.91484e-66
AT1G80280	AT1G80280	-	1:30183541-30186586	30183541	30186586	3046	2687	-2.40605	2.39047e-55	6.19656e-54
AT4G02060	MCM7	-	4:900636-905591	900636	905591	4956	2636	-2.40604	2.08072e-50	4.54456e-49
AT1G65620	AS2	-	1:24398143-24400969	24398143	24400969	2827	2001	-2.40544	8.34751e-23	5.36847e-22
AT2G43800	AT2G43800	-	2:18145721-18148897	18145721	18148897	3177	2861	-2.40436	1.24738e-69	5.54185e-68
AT1G10960	ATFD1	-	1:3664386-3665039	3664386	3665039	654	654	-2.40273	4.40227e-46	8.11734e-45
AT5G14690	AT5G14690	-	5:4733762-4734547	4733762	4734547	786	786	-2.39895	5.67627e-14	2.12901e-13
AT3G48140	AT3G48140	-	3:17778356-17779549	17778356	17779549	1194	632	-2.39781	6.94904e-28	5.83464e-27
AT5G64570	XYL4	-	5:25810115-25813335	25810115	25813335	3221	2493	-2.39695	4.05496e-34	4.5486e-33
AT4G30530	AT4G30530	-	4:14920534-14922494	14920534	14922494	1961	1032	-2.39592	8.63856e-92	8.40373e-90
AT5G33330	AT5G33330	-	5:12591683-12592896	12591683	12592896	1214	623	-2.3924	7.83246e-06	1.55977e-05
AT1G45130	BGAL5	-	1:17065252-17069262	17065252	17069262	4011	2546	-2.38902	3.80505e-27	3.07437e-26
AT1G60060	AT1G60060	-	1:22139184-22141790	22139184	22141790	2607	1464	-2.38836	2.25156e-27	1.83673e-26
AT1G61255	AT1G61255	-	1:22589151-22589691	22589151	22589691	541	541	-2.38692	4.64411e-11	1.42025e-10
AT1G10550	XTH33	-	1:3479153-3480988	3479153	3480988	1836	1068	-2.38481	4.41597e-13	1.55695e-12
AT3G05490	RALFL22	-	3:1591277-1591983	1591277	1591983	707	707	-2.3835	1.51064e-14	5.89185e-14
AT3G63200	PLP9	-	3:23345902-23347564	23345902	23347564	1663	1578	-2.38319	4.12613e-41	6.25833e-40
AT4G39010	AtGH9B18	-	4:18175902-18179183	18175902	18179183	3282	1835	-2.38292	1.946e-19	1.03131e-18
AT3G54710	CDT1	-	3:20251841-20254199	20251841	20254199	2359	1673	-2.37778	9.02403e-21	5.18499e-20
AT3G17730	anac057	-	3:6064379-6065813	6064379	6065813	1435	741	-2.37458	7.10201e-10	1.98835e-09
AT5G36890	BGLU42	-	5:14541350-14546230	14541350	14546230	4881	1933	-2.37395	3.58541e-50	7.76089e-49
AT2G28080	AT2G28080	-	2:11960571-11963293	11960571	11963293	2723	1718	-2.37349	1.10992e-31	1.12366e-30
AT4G36810	GGPS1	-	4:17343374-17344865	17343374	17344865	1492	1492	-2.37215	1.78804e-62	6.05323e-61
AT5G35740	AT5G35740	-	5:13910418-13911160	13910418	13911160	743	579	-2.37215	1.08218e-07	2.54772e-07
AT5G65990	AT5G65990	-	5:26394882-26396513	26394882	26396513	1632	1549	-2.37148	1.8023e-23	1.20345e-22
AT1G05320	AT1G05320	-	1:1553603-1557733	1553603	1557733	4131	2704	-2.37056	2.5065e-20	1.40815e-19
AT1G18590	SOT17	-	1:6398580-6399942	6398580	6399942	1363	1363	-2.36917	2.40512e-12	8.04255e-12
AT4G09650	ATPD	-	4:6100743-6101708	6100743	6101708	966	966	-2.36733	3.48047e-62	1.15972e-60
AT2G12646	AT2G12646	-	2:5167042-5169185	5167042	5169185	2144	1071	-2.36729	3.52336e-10	1.01136e-09
AT4G27440	PORB	-	4:13725546-13727353	13725546	13727353	1808	1554	-2.36674	1.19985e-07	2.81418e-07
AT4G30845	AT4G30845	-	4:15019877-15020509	15019877	15020509	633	553	-2.36575	4.46561e-10	1.2702e-09
AT4G34000	ABF3	-	4:16295430-16298255	16295430	16298255	2826	2116	-2.36566	2.40848e-18	1.18513e-17
AT2G41950	AT2G41950	-	2:17513079-17514167	17513079	17514167	1089	997	-2.36438	2.05865e-70	9.36743e-69
AT2G30370	EPFL6	-	2:12940455-12942409	12940455	12942409	1955	1057	-2.36217	1.65062e-20	9.36412e-20
AT5G05300	AT5G05300	-	5:1570102-1570410	1570102	1570410	309	309	-2.36085	8.54618e-08	2.02655e-07
AT2G40220	ATABI4	-	2:16796599-16797585	16796599	16797585	987	987	-2.36036	5.23459e-79	3.2817e-77
AT5G64572	AT5G64572	-	5:25810298-25811733	25810298	25811733	1436	1366	-2.36023	1.00697e-32	1.06133e-31
AT5G02260	ATEXPA9	-	5:463158-465246	463158	465246	2089	1249	-2.358	1.89484e-47	3.72087e-46
AT5G15580	LNG1	-	5:5068301-5072492	5068301	5072492	4192	3540	-2.35743	1.27586e-66	4.942e-65
AT3G06145	AT3G06145	-	3:1859924-1860650	1859924	1860650	727	727	-2.35621	1.80756e-22	1.13869e-21
AT1G69770	CMT3	-	1:26248318-26253585	26248318	26253585	5268	2764	-2.35485	5.5581e-31	5.40391e-30
AT4G30810	scpl29	-	4:15003451-15006212	15003451	15006212	2762	1658	-2.35397	1.00108e-58	2.89663e-57
AT2G26910	PDR4	-	2:11481623-11488186	11481623	11488186	6564	4575	-2.3535	8.50219e-58	2.36705e-56
AT2G44940	AT2G44940	-	2:18537257-18538418	18537257	18538418	1162	1162	-2.35268	9.96313e-13	3.42081e-12
AT3G10720	AT3G10720	-	3:3354447-3357614	3354447	3357614	3168	2118	-2.35177	6.74559e-26	5.16663e-25
AT5G54970	AT5G54970	-	5:22313210-22313764	22313210	22313764	555	555	-2.3517	6.05774e-33	6.44496e-32
AT2G46780	AT2G46780	-	2:19229293-19231505	19229293	19231505	2213	1696	-2.35048	8.56133e-55	2.17594e-53
AT3G44735	ATPSK3	-	3:16291180-16292464	16291180	16292464	1285	566	-2.34918	1.446e-20	8.23012e-20
AT2G03760	ST1	-	2:1149337-1150663	1149337	1150663	1327	1327	-2.34719	1.08907e-18	5.47021e-18
AT1G15080	LPP2	-	1:5187626-5189673	5187626	5189673	2048	1275	-2.34563	2.44856e-17	1.13709e-16
AT1G12500	AT1G12500	-	1:4263150-4265044	4263150	4265044	1895	1565	-2.34087	3.49793e-20	1.94129e-19
AT4G37750	ANT	-	4:17739514-17742401	17739514	17742401	2888	2148	-2.33908	2.70487e-17	1.2537e-16
AT1G02810	AT1G02810	-	1:618265-620480	618265	620480	2216	1906	-2.33832	1.66586e-27	1.37417e-26
AT1G75580	AT1G75580	-	1:28377461-28378178	28377461	28378178	718	718	-2.33714	3.46393e-30	3.23052e-29
AT5G46700	TET1	-	5:18950917-18952629	18950917	18952629	1713	1118	-2.33578	7.9814e-20	4.33155e-19
AT1G70370	PG2	-	1:26512681-26515188	26512681	26515188	2508	2364	-2.33525	6.27716e-31	6.0751e-30
AT1G03630	POR.C	-	1:907642-909376	907642	909376	1735	1394	-2.33507	1.16321e-50	2.5671e-49
AT5G43250	NF-YC13	-	5:17356174-17356566	17356174	17356566	393	393	-2.32915	7.53576e-14	2.80717e-13
AT4G25890	AT4G25890	-	4:13159484-13160495	13159484	13160495	1012	605	-2.32899	9.22671e-56	2.41392e-54
AT5G57570	AT5G57570	-	5:23313436-23314415	23313436	23314415	980	980	-2.32667	4.47481e-14	1.69112e-13
AT5G51174	SNOR30	-	5:20795936-20796051	20795936	20796051	116	116	-2.32606	6.97295e-16	2.96635e-15
AT1G21070	AT1G21070	-	1:7375869-7378147	7375869	7378147	2279	1663	-2.32534	5.9448e-20	3.2534e-19
AT3G15950	NAI2	-	3:5397569-5402652	5397569	5402652	5084	2575	-2.325	4.94848e-54	1.23362e-52
AT1G78060	AT1G78060	-	1:29349679-29352924	29349679	29352924	3246	2477	-2.32499	1.47054e-51	3.34118e-50
AT4G33145	AT4G33145	-	4:15984643-15985064	15984643	15985064	422	422	-2.32017	2.04015e-12	6.85326e-12
AT5G23920	AT5G23920	-	5:8073224-8074170	8073224	8074170	947	881	-2.31803	3.03173e-22	1.88531e-21
AT3G22540	AT3G22540	-	3:7984076-7984627	7984076	7984627	552	552	-2.31799	7.87942e-09	2.02883e-08
AT2G21530	AT2G21530	-	2:9219324-9220590	9219324	9220590	1267	804	-2.31549	2.63217e-10	7.63053e-10
AT5G67510	AT5G67510	-	5:26937813-26938451	26937813	26938451	639	639	-2.31511	6.87205e-51	1.53057e-49
AT1G09200	AT1G09200	-	1:2971593-2972199	2971593	2972199	607	607	-2.31456	4.31826e-42	6.81858e-41
AT3G09250	AT3G09250	-	3:2839000-2840614	2839000	2840614	1615	1135	-2.31304	7.10263e-32	7.24691e-31
AT2G43910	HOL1	-	2:18184461-18187028	18184461	18187028	2568	1025	-2.3128	9.00728e-08	2.1315e-07
AT4G29690	AT4G29690	-	4:14540907-14542481	14540907	14542481	1575	1575	-2.31079	1.99695e-28	1.72286e-27
AT4G30440	GAE1	-	4:14881855-14883480	14881855	14883480	1626	1626	-2.31034	1.5444e-55	4.01568e-54
AT1G55740	AtSIP1	-	1:20835366-20838778	20835366	20838778	3413	2477	-2.31026	1.665e-66	6.3908e-65
AT5G42445	AT5G42445	-	5:16976272-16976613	16976272	16976613	342	342	-2.30986	4.11625e-16	1.77563e-15
AT4G38410	AT4G38410	-	4:17980940-17981719	17980940	17981719	780	692	-2.30766	3.70084e-10	1.05997e-09
AT2G23430	KRP1	-	2:9976746-9978021	9976746	9978021	1276	950	-2.30765	1.60756e-20	9.13125e-20
AT3G54400	AT3G54400	-	3:20140058-20142642	20140058	20142642	2585	1554	-2.30585	1.89264e-20	1.06967e-19
AT3G43430	AT3G43430	-	3:15354535-15355304	15354535	15355304	770	770	-2.30506	0.000113644	0.000202469
AT1G78660	GGH1	-	1:29585677-29588302	29585677	29588302	2626	1517	-2.30422	7.94384e-74	4.11209e-72
AT1G51100	AT1G51100	-	1:18934308-18935193	18934308	18935193	886	886	-2.30266	2.15731e-49	4.54755e-48
AT1G12013	SNOR111	-	1:4058287-4058416	4058287	4058416	130	130	-2.29693	1.07576e-09	2.96763e-09
AT5G22920	AT5G22920	-	5:7664991-7667265	7664991	7667265	2275	1262	-2.29153	3.53895e-10	1.01549e-09
AT1G17020	SRG1	-	1:5820206-5822013	5820206	5822013	1808	1401	-2.29113	1.39472e-52	3.27895e-51
AT1G29300	UNE1	-	1:10247780-10249594	10247780	10249594	1815	1815	-2.2904	5.29934e-37	6.76485e-36
AT1G70470	AT1G70470	-	1:26559359-26560123	26559359	26560123	765	765	-2.28941	3.06678e-07	6.94003e-07
AT3G18130	RACK1C_AT	-	3:6210904-6212433	6210904	6212433	1530	1248	-2.28899	1.23983e-60	3.88641e-59
AT2G41900	AT2G41900	-	2:17490405-17493922	17490405	17493922	3518	2887	-2.28618	2.76799e-56	7.33235e-55
AT4G17600	LIL3:1	-	4:9803705-9804872	9803705	9804872	1168	1001	-2.28415	1.46776e-78	9.03449e-77
AT3G53890	AT3G53890	-	3:19955344-19956361	19955344	19956361	1018	584	-2.28313	5.42962e-46	9.94666e-45
AT2G04025	RGF3	-	2:1276777-1277734	1276777	1277734	958	511	-2.27997	1.30746e-06	2.79824e-06
AT5G50150	AT5G50150	-	5:20402257-20406731	20402257	20406731	4475	1806	-2.27926	1.36756e-16	6.07099e-16
AT1G08280	AT1G08280	-	1:2608408-2609853	2608408	2609853	1446	1446	-2.27752	1.22261e-24	8.76167e-24
AT4G21850	MSRB9	-	4:11591116-11592238	11591116	11592238	1123	898	-2.27643	1.57261e-12	5.3218e-12
AT2G46150	AT2G46150	-	2:18961403-18962376	18961403	18962376	974	974	-2.27194	5.98437e-12	1.94578e-11
AT4G37930	STM	-	4:17831731-17834927	17831731	17834927	3197	1899	-2.27064	7.89638e-73	3.90824e-71
AT3G29360	AT3G29360	-	3:11267091-11269229	11267091	11269229	2139	1794	-2.27059	1.73513e-53	4.2199e-52
AT5G44286	AT5G44286	-	5:17840220-17840304	17840220	17840304	85	85	-2.26876	1.2458e-07	2.91754e-07
AT1G14750	SDS	-	1:5079407-5082520	5079407	5082520	3114	2101	-2.26634	5.32795e-18	2.57161e-17
AT3G06140	AT3G06140	-	3:1856682-1858855	1856682	1858855	2174	1469	-2.26619	6.49317e-13	2.2592e-12
AT1G56430	ATNAS4	-	1:21136944-21138087	21136944	21138087	1144	1144	-2.266	1.80082e-09	4.87409e-09
AT1G17560	HLL	-	1:6037464-6038692	6037464	6038692	1229	880	-2.26352	1.83086e-15	7.6089e-15
AT1G71100	RSW10	-	1:26814632-26815671	26814632	26815671	1040	1040	-2.26273	2.23616e-38	3.03054e-37
AT3G45310	AT3G45310	-	3:16628384-16630521	16628384	16630521	2138	1445	-2.26259	1.0065e-52	2.37615e-51
AT3G58193	AT3G58193	-	3:21559060-21559139	21559060	21559139	80	80	-2.25715	1.44854e-06	3.08693e-06
AT5G37600	GLN1;1	-	5:14933336-14935841	14933336	14935841	2506	1494	-2.25686	3.92504e-81	2.65757e-79
AT5G21105	AT5G21105	-	5:7172687-7177841	7172687	7177841	5155	2638	-2.25389	4.80347e-38	6.41233e-37
AT4G37450	AGP18	-	4:17605758-17606755	17605758	17606755	998	819	-2.25281	1.18412e-10	3.51395e-10
AT5G65310	ATHB5	-	5:26101939-26104614	26101939	26104614	2676	1924	-2.25209	5.09632e-61	1.62765e-59
AT2G18380	GATA20	-	2:7982868-7984096	7982868	7984096	1229	706	-2.25146	9.56295e-09	2.44668e-08
AT3G48130	RSU1	-	3:17774952-17775128	17774952	17775128	177	177	-2.25013	6.95245e-15	2.7795e-14
AT5G48450	sks3	-	5:19632791-19635664	19632791	19635664	2874	1918	-2.24883	7.82998e-67	3.06092e-65
AT1G70560	SAV3	-	1:26604855-26607503	26604855	26607503	2649	1399	-2.24832	7.3629e-20	4.00488e-19
AT3G47560	AT3G47560	-	3:17525485-17527052	17525485	17527052	1568	1122	-2.24646	1.98573e-18	9.82531e-18
AT3G09780	CCR1	-	3:3000759-3003179	3000759	3003179	2421	2421	-2.24498	3.15394e-42	4.98942e-41
AT2G25220	AT2G25220	-	2:10742713-10745594	10742713	10745594	2882	1573	-2.24385	1.13735e-31	1.15006e-30
AT4G08690	AT4G08690	-	4:5551315-5553151	5551315	5553151	1837	1317	-2.24316	6.38118e-19	3.26623e-18
AT3G63430	AT3G63430	-	3:23420366-23422399	23420366	23422399	2034	1869	-2.24167	1.75578e-13	6.35996e-13
AT1G33240	AT-GTL1	-	1:12051471-12054546	12051471	12054546	3076	2624	-2.24095	1.26697e-70	5.81193e-69
AT5G40460	AT5G40460	-	5:16202247-16202932	16202247	16202932	686	686	-2.23977	5.41694e-07	1.19969e-06
AT1G62500	AT1G62500	-	1:23132045-23133502	23132045	23133502	1458	1458	-2.23941	3.9899e-14	1.51259e-13
AT5G39760	AtHB23	-	5:15911416-15912830	15911416	15912830	1415	1415	-2.23854	4.62014e-35	5.42714e-34
AT2G29670	AT2G29670	-	2:12681958-12685087	12681958	12685087	3130	2149	-2.23793	3.53126e-19	1.84259e-18
AT3G50100	SDN1	-	3:18578353-18580594	18578353	18580594	2242	1288	-2.23769	5.29336e-14	1.98936e-13
AT1G10740	AT1G10740	-	1:3567905-3570838	3567905	3570838	2934	2097	-2.23743	6.66149e-89	5.93468e-87
AT1G19990	AT1G19990	-	1:6935218-6936693	6935218	6936693	1476	893	-2.23687	2.92059e-33	3.15286e-32
AT3G46940	DUT1	-	3:17288194-17288952	17288194	17288952	759	759	-2.23642	1.00386e-48	2.07477e-47
AT3G50230	AT3G50230	-	3:18620599-18623200	18620599	18623200	2602	1983	-2.23579	6.28405e-20	3.43573e-19
AT4G16400	AT4G16400	-	4:9260564-9262670	9260564	9262670	2107	1225	-2.23546	5.35024e-45	9.4337e-44
AT3G04060	anac046	-	3:1053366-1055163	1053366	1055163	1798	1487	-2.23538	1.73475e-11	5.45801e-11
AT5G04020	AT5G04020	-	5:1081611-1086546	1081611	1086546	4936	4780	-2.23524	4.07455e-16	1.75899e-15
AT5G05890	AT5G05890	-	5:1772543-1774113	1772543	1774113	1571	1493	-2.23216	1.13556e-46	2.15488e-45
AT3G05180	AT3G05180	-	3:1468398-1470551	1468398	1470551	2154	1363	-2.22783	1.94517e-37	2.53277e-36
AT1G16880	AT1G16880	-	1:5773592-5776308	5773592	5776308	2717	1555	-2.22677	4.81297e-31	4.69292e-30
AT1G68530	G2	-	1:25712588-25714807	25712588	25714807	2220	2220	-2.22568	2.44768e-33	2.6491e-32
AT2G43150	AT2G43150	-	2:17945893-17947022	17945893	17947022	1130	1047	-2.22511	0.00014074	0.00024813
AT2G16400	BLH7	-	2:7101330-7103921	7101330	7103921	2592	2156	-2.22502	1.20552e-33	1.32076e-32
AT4G14440	ATECI3	-	4:8306745-8307753	8306745	8307753	1009	1009	-2.22371	7.10752e-25	5.16126e-24
AT3G06770	AT3G06770	-	3:2134800-2137228	2134800	2137228	2429	2001	-2.22256	1.31929e-16	5.85978e-16
AT2G37100	AT2G37100	-	2:15591101-15592104	15591101	15592104	1004	1004	-2.22238	3.21069e-25	2.36911e-24
AT1G23740	AT1G23740	-	1:8398115-8399749	8398115	8399749	1635	1384	-2.22009	1.56872e-31	1.57309e-30
AT5G36110	CYP716A1	-	5:14195377-14197613	14195377	14197613	2237	1434	-2.21989	2.6544e-14	1.01723e-13
AT5G14760	AO	-	5:4768468-4772153	4768468	4772153	3686	2389	-2.21793	1.22031e-22	7.77719e-22
AT3G24612	AT3G24612	-	3:8979067-8979153	8979067	8979153	87	87	-2.21791	4.45744e-08	1.0805e-07
AT4G30500	AT4G30500	-	4:14903487-14904917	14903487	14904917	1431	746	-2.21769	3.10086e-12	1.02777e-11
AT1G13270	MAP1C	-	1:4544953-4547312	4544953	4547312	2360	1416	-2.21698	2.04921e-77	1.21283e-75
AT1G09780	AT1G09780	-	1:3165370-3167869	3165370	3167869	2500	1911	-2.21625	1.70904e-50	3.74727e-49
AT4G22235	AT4G22235	-	4:11763625-11764328	11763625	11764328	704	615	-2.21391	3.23471e-16	1.40359e-15
AT1G74500	ATBS1	-	1:27998175-27998821	27998175	27998821	647	558	-2.21176	5.80395e-20	3.17837e-19
AT1G23090	AST91	-	1:8184952-8189064	8184952	8189064	4113	2292	-2.21059	1.65716e-35	1.98519e-34
AT1G04680	AT1G04680	-	1:1303529-1307884	1303529	1307884	4356	1923	-2.2102	3.40471e-21	2.00179e-20
AT4G22233	AT4G22233	-	4:11763454-11763985	11763454	11763985	532	488	-2.20992	4.87185e-14	1.83502e-13
AT1G47380	AT1G47380	-	1:17372537-17376075	17372537	17376075	3539	2046	-2.20927	1.29154e-66	4.99132e-65
AT1G05000	AT1G05000	-	1:1425593-1428782	1425593	1428782	3190	1200	-2.20847	1.50153e-11	4.74451e-11
AT5G34940	AtGUS3	-	5:13235829-13238839	13235829	13238839	3011	2449	-2.20703	1.31396e-57	3.61061e-56
AT3G25700	AT3G25700	-	3:9358719-9360463	9358719	9360463	1745	1745	-2.20586	3.6441e-64	1.30134e-62
AT3G03990	AT3G03990	-	3:1033768-1034906	1033768	1034906	1139	1139	-2.20578	1.20401e-08	3.05504e-08
AT4G35320	AT4G35320	-	4:16805869-16806655	16805869	16806655	787	787	-2.20351	5.23355e-06	1.05903e-05
AT1G68890	AT1G68890	-	1:25896945-25906714	25896945	25906714	9770	5352	-2.202	2.53199e-55	6.55337e-54
AT4G35030	AT4G35030	-	4:16675702-16678206	16675702	16678206	2505	1860	-2.19894	9.25077e-12	2.973e-11
AT4G38660	AT4G38660	-	4:18066177-18068205	18066177	18068205	2029	1621	-2.19876	2.04625e-62	6.89978e-61
AT5G07620	AT5G07620	-	5:2407401-2409066	2407401	2409066	1666	1080	-2.19795	4.51584e-07	1.00711e-06
AT3G58196	AT3G58196	-	3:21559244-21559320	21559244	21559320	77	77	-2.19764	2.1807e-08	5.42436e-08
AT5G08050	AT5G08050	-	5:2578345-2579163	2578345	2579163	819	749	-2.19654	2.41004e-08	5.96502e-08
AT4G17240	AT4G17240	-	4:9666593-9668374	9666593	9668374	1782	1368	-2.19114	1.0676e-10	3.18101e-10
AT2G14660	AT2G14660	-	2:6272491-6273083	6272491	6273083	593	593	-2.191	3.76361e-34	4.22738e-33
AT1G76620	AT1G76620	-	1:28756521-28759297	28756521	28759297	2777	2016	-2.19068	7.84701e-16	3.32648e-15
AT3G53800	Fes1B	-	3:19930861-19932892	19930861	19932892	2032	1346	-2.19051	6.7382e-41	1.01565e-39
AT4G05220	AT4G05220	-	4:2685104-2685784	2685104	2685784	681	681	-2.19033	4.16244e-07	9.30503e-07
AT2G43290	MSS3	-	2:17991052-17992047	17991052	17992047	996	996	-2.1902	2.67783e-11	8.32615e-11
AT1G60960	IRT3	-	1:22445310-22447214	22445310	22447214	1905	1532	-2.19002	9.4778e-59	2.7471e-57
AT5G10430	AGP4	-	5:3277532-3278313	3277532	3278313	782	782	-2.18953	1.52171e-08	3.82619e-08
AT5G09820	AT5G09820	-	5:3055779-3057447	3055779	3057447	1669	1287	-2.18927	1.65077e-20	9.36412e-20
AT5G57800	WAX2	-	5:23420209-23424052	23420209	23424052	3844	2499	-2.18769	4.19533e-34	4.70293e-33
AT2G46440	ATCNGC11	-	2:19061861-19064881	19061861	19064881	3021	2340	-2.18764	1.76953e-17	8.29259e-17
AT1G41830	SKS6	-	1:15603617-15607966	15603617	15607966	4350	2068	-2.18745	4.76829e-63	1.63386e-61
AT4G34240	ALDH3	-	4:16389620-16392824	16389620	16392824	3205	2111	-2.1863	1.79414e-57	4.90621e-56
AT4G20430	AT4G20430	-	4:11017629-11021280	11017629	11021280	3652	2773	-2.18624	3.68625e-24	2.56778e-23
AT1G66280	BGLU22	-	1:24706512-24709785	24706512	24709785	3274	1870	-2.18612	4.65784e-27	3.74375e-26
AT4G25900	AT4G25900	-	4:13161346-13163636	13161346	13163636	2291	1337	-2.18397	2.23295e-09	5.98625e-09
AT1G07620	ATOBGM	-	1:2344390-2346842	2344390	2346842	2453	2053	-2.18325	1.6001e-14	6.23071e-14
AT4G29030	AT4G29030	-	4:14307249-14307973	14307249	14307973	725	725	-2.18003	7.63953e-17	3.4383e-16
AT5G45280	AT5G45280	-	5:18345595-18349695	18345595	18349695	4101	1496	-2.17882	1.47238e-59	4.41898e-58
AT4G20730	AT4G20730	-	4:11117798-11120595	11117798	11120595	2798	2649	-2.17879	5.09506e-25	3.73351e-24
AT5G39970	AT5G39970	-	5:15998025-16000813	15998025	16000813	2789	2265	-2.17828	1.85664e-16	8.16507e-16
AT2G32380	AT2G32380	-	2:13746611-13747791	13746611	13747791	1181	749	-2.17735	3.13123e-15	1.28056e-14
AT1G75690	AT1G75690	-	1:28422110-28423285	28422110	28423285	1176	743	-2.17727	4.04434e-22	2.49485e-21
AT3G15115	AT3G15115	-	3:5085992-5087489	5085992	5087489	1498	1384	-2.17717	5.88352e-23	3.82598e-22
AT1G03850	AT1G03850	-	1:976097-977761	976097	977761	1665	1065	-2.17331	2.24961e-29	2.02441e-28
AT5G66690	UGT72E2	-	5:26625080-26626793	26625080	26626793	1714	1714	-2.17323	1.78067e-11	5.59625e-11
AT1G15760	AT1G15760	-	1:5425714-5426322	5425714	5426322	609	609	-2.17237	1.11586e-12	3.81424e-12
AT1G15002	AT1G15002	-	1:5169940-5170435	5169940	5170435	496	496	-2.17052	7.46917e-12	2.41188e-11
AT1G62170	AT1G62170	-	1:22973840-22975754	22973840	22975754	1915	1728	-2.16991	1.16978e-09	3.21338e-09
AT3G63120	CYCP1;1	-	3:23322956-23324247	23322956	23324247	1292	1009	-2.16694	1.01156e-41	1.57668e-40
AT4G12690	AT4G12690	-	4:7480641-7482150	7480641	7482150	1510	1510	-2.16433	7.5698e-23	4.88315e-22
AT3G04380	SUVR4	-	3:1161387-1164929	1161387	1164929	3543	2084	-2.16302	1.03442e-14	4.07866e-14
AT1G12880	atnudt12	-	1:4389751-4391151	4389751	4391151	1401	1002	-2.16197	1.55533e-07	3.61239e-07
AT1G55760	AT1G55760	-	1:20846908-20849054	20846908	20849054	2147	1746	-2.16182	1.58541e-10	4.66392e-10
AT2G16660	AT2G16660	-	2:7218706-7221625	7218706	7221625	2920	1898	-2.1562	1.12272e-81	7.72529e-80
AT5G04820	ATOFP13	-	5:1399619-1400784	1399619	1400784	1166	1166	-2.1557	9.33086e-15	3.69458e-14
AT3G59680	AT3G59680	-	3:22044004-22046040	22044004	22046040	2037	1143	-2.15539	4.15599e-09	1.09186e-08
AT5G43060	AT5G43060	-	5:17269507-17272164	17269507	17272164	2658	1716	-2.15362	8.97883e-22	5.43773e-21
AT2G24150	HHP3	-	2:10265484-10267405	10265484	10267405	1922	1243	-2.15263	4.09925e-71	1.90627e-69
AT5G26300	AT5G26300	-	5:9229326-9231033	9229326	9231033	1708	1050	-2.15168	1.44806e-16	6.41323e-16
AT2G28305	LOG1	-	2:12081113-12084664	12081113	12084664	3552	1072	-2.15075	3.65906e-12	1.20758e-11
AT1G52280	AtRABG3d	-	1:19467969-19469586	19467969	19469586	1618	939	-2.15064	1.13946e-21	6.87128e-21
AT4G37650	SHR	-	4:17691786-17693760	17691786	17693760	1975	1975	-2.148	7.16861e-26	5.47825e-25
AT2G16060	GLB1	-	2:6982531-6983631	6982531	6983631	1101	843	-2.14604	6.27565e-19	3.21416e-18
AT4G37400	CYP81F3	-	4:17584051-17586360	17584051	17586360	2310	1714	-2.14589	2.39748e-13	8.60337e-13
AT1G03743	AT1G03743	-	1:937207-937287	937207	937287	81	81	-2.14301	0.00132239	0.00209942
AT3G53620	AtPPa4	-	3:19880504-19883672	19880504	19883672	3169	1296	-2.14224	1.45093e-16	6.42423e-16
AT5G43420	AT5G43420	-	5:17451669-17453124	17451669	17453124	1456	1456	-2.14106	1.26338e-16	5.62622e-16
AT1G66400	CML23	-	1:24770575-24771371	24770575	24771371	797	797	-2.14103	3.17375e-09	8.40064e-09
AT2G02500	ISPD	-	2:670878-673155	670878	673155	2278	1116	-2.14078	3.97377e-33	4.26802e-32
AT5G03310	AT5G03310	-	5:799224-799706	799224	799706	483	483	-2.14007	1.54508e-13	5.62444e-13
AT2G37170	PIP2B	-	2:15613402-15614857	15613402	15614857	1456	1146	-2.13874	2.24761e-20	1.26439e-19
AT5G26667	PYR6	-	5:9275947-9278596	9275947	9278596	2650	1276	-2.13747	7.79088e-48	1.54966e-46
AT1G73760	AT1G73760	-	1:27739168-27741207	27739168	27741207	2040	1348	-2.13642	6.15953e-15	2.46658e-14
AT1G06100	AT1G06100	-	1:1851530-1853019	1851530	1853019	1490	900	-2.13576	3.28302e-08	8.04804e-08
AT2G43040	NPG1	-	2:17895883-17899374	17895883	17899374	3492	2582	-2.13559	7.23395e-20	3.9398e-19
AT3G48730	GSA2	-	3:18049614-18051702	18049614	18051702	2089	1654	-2.13471	7.06193e-51	1.56873e-49
AT5G53210	SPCH	-	5:21586606-21588941	21586606	21588941	2336	1095	-2.13155	2.21672e-09	5.94556e-09
AT2G27690	CYP94C1	-	2:11809306-11811215	11809306	11811215	1910	1910	-2.13124	8.71286e-36	1.05722e-34
AT1G74070	AT1G74070	-	1:27851488-27852976	27851488	27852976	1489	1330	-2.12939	7.84099e-17	3.52616e-16
AT5G54380	THE1	-	5:22077092-22079880	22077092	22079880	2789	2789	-2.12892	1.5139e-52	3.54436e-51
AT2G36307	ZPR4	-	2:15218040-15219415	15218040	15219415	1376	706	-2.12878	1.57165e-11	4.95775e-11
AT3G61560	AT3G61560	-	3:22777829-22780191	22777829	22780191	2363	1104	-2.12806	2.0168e-19	1.06649e-18
AT4G13245	AT4G13245	-	4:7684061-7684142	7684061	7684142	82	82	-2.1271	2.02646e-10	5.92637e-10
AT3G05740	RECQI1	-	3:1698112-1701399	1698112	1701399	3288	2060	-2.1267	1.30158e-12	4.43117e-12
AT3G23805	RALFL24	-	3:8586382-8587056	8586382	8587056	675	675	-2.12617	1.41934e-09	3.87002e-09
AT5G17630	AT5G17630	-	5:5809334-5810962	5809334	5810962	1629	1629	-2.12605	2.14273e-55	5.56289e-54
AT1G58420	AT1G58420	-	1:21707379-21708118	21707379	21708118	740	740	-2.12184	4.81723e-07	1.07206e-06
AT3G50310	MAPKKK20	-	3:18648151-18649521	18648151	18649521	1371	1371	-2.12114	1.84396e-27	1.51445e-26
AT2G19170	SLP3	-	2:8314005-8318596	8314005	8318596	4592	2906	-2.11956	6.29154e-26	4.82979e-25
AT5G22940	F8H	-	5:7676938-7679179	7676938	7679179	2242	1956	-2.11894	3.59928e-14	1.36787e-13
AT3G26060	ATPRX.Q	-	3:9524725-9526407	9524725	9526407	1683	1020	-2.11715	2.58829e-49	5.42899e-48
AT5G28500	AT5G28500	-	5:10477771-10479384	10477771	10479384	1614	1614	-2.11491	3.07504e-42	4.87828e-41
AT5G19090	AT5G19090	-	5:6387489-6390024	6387489	6390024	2536	2163	-2.11383	5.55736e-35	6.49651e-34
AT4G02330	ATPMEPCRB	-	4:1032413-1035037	1032413	1035037	2625	1897	-2.11375	3.84275e-06	7.8863e-06
AT1G50575	AT1G50575	-	1:18728719-18730409	18728719	18730409	1691	1177	-2.11314	2.2409e-26	1.7464e-25
AT1G74730	AT1G74730	-	1:28078857-28079987	28078857	28079987	1131	891	-2.11173	3.46753e-25	2.55306e-24
AT5G64100	AT5G64100	-	5:25650641-25652123	25650641	25652123	1483	1240	-2.11135	9.13163e-11	2.73432e-10
AT1G24170	LGT9	-	1:8557216-8558832	8557216	8558832	1617	1617	-2.11061	2.64505e-27	2.14944e-26
AT1G73590	PIN1	-	1:27659673-27663178	27659673	27663178	3506	2270	-2.11014	1.06487e-57	2.94045e-56
AT5G53290	CRF3	-	5:21617813-21619267	21617813	21619267	1455	1455	-2.10942	2.02753e-50	4.43412e-49
AT1G48630	RACK1B_AT	-	1:17981773-17983327	17981773	17983327	1555	1244	-2.10652	1.4395e-46	2.71039e-45
AT5G28020	CYSD2	-	5:10026183-10028580	10026183	10028580	2398	1665	-2.10549	8.47721e-19	4.28595e-18
AT3G05470	AT3G05470	-	3:1579667-1582547	1579667	1582547	2881	2655	-2.10465	3.56211e-16	1.5417e-15
AT3G48540	AT3G48540	-	3:17989798-17992015	17989798	17992015	2218	699	-2.10367	1.59888e-15	6.66441e-15
AT4G34260	FUC95A	-	4:16398028-16401810	16398028	16401810	3783	2853	-2.10042	1.18785e-59	3.5905e-58
AT1G28580	AT1G28580	-	1:10044337-10046442	10044337	10046442	2106	1764	-2.09979	2.4821e-83	1.81097e-81
AT1G69543	AT1G69543	-	1:26148437-26148781	26148437	26148781	345	345	-2.09976	3.31619e-05	6.24535e-05
AT5G18300	anac088	-	5:6057773-6058216	6057773	6058216	444	444	-2.09668	4.53985e-09	1.18957e-08
AT5G48170	SLY2	-	5:19532537-19533265	19532537	19533265	729	729	-2.09512	7.19503e-07	1.57596e-06
AT4G27860	AT4G27860	-	4:13873708-13876528	13873708	13876528	2821	2224	-2.09474	9.79154e-58	2.70819e-56
AT4G30200	VEL1	-	4:14786633-14790501	14786633	14790501	3869	2662	-2.0927	6.78934e-55	1.72817e-53
AT5G46580	AT5G46580	-	5:18897445-18899645	18897445	18899645	2201	2201	-2.09244	2.17366e-58	6.19421e-57
AT2G35384	AT2G35384	-	2:14894549-14894627	14894549	14894627	79	79	-2.09142	1.19718e-06	2.57003e-06
AT4G00480	myc1	-	4:216812-219743	216812	219743	2932	1934	-2.0894	3.98448e-30	3.70782e-29
AT1G64640	ENODL8	-	1:24022285-24023196	24022285	24023196	912	818	-2.0878	2.39919e-25	1.78197e-24
AT4G28100	AT4G28100	-	4:13965108-13966860	13965108	13966860	1753	1270	-2.08682	7.03016e-47	1.35227e-45
AT3G10610	AT3G10610	-	3:3319027-3320149	3319027	3320149	1123	780	-2.08594	5.58251e-60	1.70261e-58
AT4G12420	SKU5	-	4:7349267-7353135	7349267	7353135	3869	2572	-2.0845	9.39768e-62	3.08284e-60
AT2G35480	AT2G35480	-	2:14910410-14912048	14910410	14912048	1639	987	-2.08381	9.77536e-19	4.92316e-18
AT2G07690	MCM5	-	2:3523163-3527460	3523163	3527460	4298	2472	-2.08313	1.19181e-38	1.63483e-37
AT5G66562	AT5G66562	-	5:26567370-26567453	26567370	26567453	84	84	-2.08301	7.8303e-11	2.35801e-10
AT1G31070	GlcNAc1pUT1	-	1:11084859-11088563	11084859	11088563	3705	2004	-2.08256	3.36979e-36	4.14237e-35
AT1G49580	AT1G49580	-	1:18351458-18354619	18351458	18354619	3162	2209	-2.07915	4.20555e-58	1.1786e-56
AT4G13120	AT4G13120	-	4:7644089-7646587	7644089	7646587	2499	2499	-2.07871	7.42323e-15	2.95933e-14
AT5G19100	AT5G19100	-	5:6408242-6409417	6408242	6409417	1176	1176	-2.07732	1.02209e-12	3.50645e-12
AT3G56940	ACSF	-	3:21076505-21078443	21076505	21078443	1939	1493	-2.07723	4.6748e-55	1.20259e-53
AT2G03750	AT2G03750	-	2:1147807-1149061	1147807	1149061	1255	1255	-2.07719	1.74742e-08	4.37449e-08
AT2G41420	AT2G41420	-	2:17266477-17268024	17266477	17268024	1548	765	-2.0757	5.46202e-50	1.17033e-48
AT5G01075	AT5G01075	-	5:26848-27449	26848	27449	602	519	-2.07352	2.19852e-13	7.91458e-13
AT2G27840	HDA13	-	2:11861994-11863886	11861994	11863886	1893	896	-2.07343	1.32244e-51	3.01279e-50
AT2G37585	AT2G37585	-	2:15765784-15767878	15765784	15767878	2095	1391	-2.07308	4.54597e-15	1.8409e-14
AT1G70940	PIN3	-	1:26743054-26746395	26743054	26746395	3342	2563	-2.07259	1.05237e-39	1.51733e-38
AT3G02870	VTC4	-	3:627512-629845	627512	629845	2334	1209	-2.07247	5.18704e-26	3.98733e-25
AT2G39900	AT2G39900	-	2:16658656-16660437	16658656	16660437	1782	1003	-2.07222	1.1643e-14	4.57584e-14
AT5G05370	AT5G05370	-	5:1590797-1591903	1590797	1591903	1107	433	-2.07111	1.59633e-42	2.55639e-41
AT1G01060	LHY	-	1:33379-37871	33379	37871	4493	3234	-2.07084	4.51646e-64	1.59857e-62
AT1G72940	AT1G72940	-	1:27442238-27443856	27442238	27443856	1619	1525	-2.06912	5.56621e-19	2.86207e-18
AT1G44000	AT1G44000	-	1:16708068-16709713	16708068	16709713	1646	1108	-2.06827	1.47802e-31	1.48743e-30
AT4G00820	iqd17	-	4:349116-351550	349116	351550	2435	2032	-2.06554	7.53583e-43	1.22183e-41
AT1G12110	CHL1-1	-	1:4105233-4109545	4105233	4109545	4313	2136	-2.06419	6.68677e-35	7.77383e-34
AT4G12880	ENODL19	-	4:7544381-7545327	7544381	7545327	947	738	-2.06111	4.5543e-37	5.82696e-36
AT3G56240	CCH	-	3:20863257-20864544	20863257	20864544	1288	711	-2.0582	7.71201e-08	1.83447e-07
AT3G56330	AT3G56330	-	3:20890250-20892002	20890250	20892002	1753	1371	-2.05731	1.20879e-34	1.38438e-33
AT2G19660	AT2G19660	-	2:8496720-8498708	8496720	8498708	1989	1989	-2.05689	4.31135e-11	1.32269e-10
AT4G15230	ATPDR2	-	4:8680182-8686880	8680182	8686880	6699	4316	-2.05581	6.89764e-68	2.84079e-66
AT1G72810	AT1G72810	-	1:27398591-27400417	27398591	27400417	1827	1744	-2.05477	3.77892e-31	3.70816e-30
AT5G15050	AT5G15050	-	5:4871639-4873598	4871639	4873598	1960	1630	-2.05404	1.74234e-15	7.25168e-15
AT1G69490	NAP	-	1:26122139-26123421	26122139	26123421	1283	1100	-2.05031	2.2925e-18	1.1297e-17
AT2G37660	AT2G37660	-	2:15795213-15797059	15795213	15797059	1847	1328	-2.0483	3.85456e-40	5.65392e-39
AT3G48440	AT3G48440	-	3:17941402-17943576	17941402	17943576	2175	1347	-2.04687	1.71847e-34	1.9575e-33
AT1G21310	RSH	-	1:7453236-7455009	7453236	7455009	1774	1663	-2.04607	4.0145e-12	1.32077e-11
AT2G05760	AT2G05760	-	2:2180919-2183904	2180919	2183904	2986	1816	-2.04565	8.97206e-13	3.09119e-12
AT5G06165	AT5G06165	-	5:1867197-1868244	1867197	1868244	1048	919	-2.04345	3.8922e-19	2.02282e-18
AT4G15790	AT4G15790	-	4:8982183-8984210	8982183	8984210	2028	792	-2.04335	6.4624e-39	8.96632e-38
AT5G20400	AT5G20400	-	5:6894844-6896349	6894844	6896349	1506	1238	-2.04016	4.1455e-52	9.53408e-51
AT5G01830	AT5G01830	-	5:320695-323169	320695	323169	2475	2475	-2.03945	2.26865e-10	6.61182e-10
AT2G03830	RGF8	-	2:1171136-1172363	1171136	1172363	1228	678	-2.03895	7.97756e-08	1.89604e-07
AT1G61580	ARP2	-	1:22720692-22723152	22720692	22723152	2461	1354	-2.03879	1.7932e-69	7.90457e-68
AT1G31920	AT1G31920	-	1:11461855-11463848	11461855	11463848	1994	1994	-2.03858	2.2531e-16	9.86247e-16
AT3G60440	AT3G60440	-	3:22337793-22339446	22337793	22339446	1654	1204	-2.03841	1.02634e-17	4.87589e-17
AT1G28510	AT1G28510	-	1:10023876-10026295	10023876	10026295	2420	1032	-2.03732	1.09094e-59	3.30347e-58
AT1G01140	CIPK9	-	1:64166-67625	64166	67625	3460	1707	-2.03646	1.37092e-42	2.20166e-41
AT5G44650	CEST	-	5:18013149-18015403	18013149	18015403	2255	1201	-2.03499	6.50835e-74	3.40021e-72
AT1G62200	AT1G62200	-	1:22982036-22984359	22982036	22984359	2324	1909	-2.03495	9.84302e-16	4.15182e-15
AT2G43141	AT2G43141	-	2:17923563-17923637	17923563	17923637	75	75	-2.0347	0.000950974	0.00153438
AT4G36890	IRX14	-	4:17379175-17381780	17379175	17381780	2606	2187	-2.03404	7.09435e-77	4.08456e-75
AT4G00150	HAM3	-	4:57199-59286	57199	59286	2088	2088	-2.03315	5.42412e-16	2.32382e-15
AT2G13820	AT2G13820	-	2:5774146-5776289	5774146	5776289	2144	1258	-2.033	1.45349e-07	3.38327e-07
AT4G10800	AT4G10800	-	4:6643309-6644845	6643309	6644845	1537	1264	-2.03207	4.55403e-18	2.20561e-17
AT1G12900	GAPA-2	-	1:4392450-4394400	4392450	4394400	1951	1551	-2.03167	9.56562e-18	4.55976e-17
AT2G47140	AT2G47140	-	2:19350740-19352088	19350740	19352088	1349	1033	-2.03027	0.000152134	0.000267217
AT5G16540	ZFN3	-	5:5403188-5405154	5403188	5405154	1967	1595	-2.0301	4.172e-12	1.37125e-11
AT5G66564	AT5G66564	-	5:26567521-26567604	26567521	26567604	84	84	-2.03007	3.14285e-10	9.05669e-10
AT5G19290	AT5G19290	-	5:6494055-6495284	6494055	6495284	1230	1230	-2.02952	1.03753e-32	1.09286e-31
AT5G18570	CPSAR1	-	5:6171661-6174833	6171661	6174833	3173	2234	-2.0274	3.66044e-52	8.43717e-51
AT4G11100	AT4G11100	-	4:6768614-6770184	6768614	6770184	1571	1347	-2.02654	3.01234e-25	2.22566e-24
AT1G22160	AT1G22160	-	1:7823149-7823971	7823149	7823971	823	730	-2.02606	2.64666e-08	6.53251e-08
AT1G53580	GLY3	-	1:19991275-19993334	19991275	19993334	2060	1241	-2.02576	6.22777e-59	1.82068e-57
AT3G13470	AT3G13470	-	3:4389256-4392801	4389256	4392801	3546	2093	-2.02407	7.20447e-48	1.43809e-46
AT5G26270	AT5G26270	-	5:9206375-9208136	9206375	9208136	1762	1267	-2.02204	1.25672e-07	2.94143e-07
AT5G23730	RUP2	-	5:8005234-8006630	8005234	8006630	1397	1397	-2.02179	5.61542e-06	1.13252e-05
AT3G44220	AT3G44220	-	3:15928160-15929758	15928160	15929758	1599	790	-2.02077	8.35973e-09	2.14727e-08
AT5G07610	AT5G07610	-	5:2406068-2407330	2406068	2407330	1263	1263	-2.02065	4.88857e-13	1.71678e-12
AT5G08350	AT5G08350	-	5:2686245-2687251	2686245	2687251	1007	917	-2.02057	2.05933e-09	5.5401e-09
AT3G04650	AT3G04650	-	3:1261984-1264622	1261984	1264622	2639	1773	-2.02052	1.12458e-52	2.65121e-51
AT1G32470	AT1G32470	-	1:11739304-11740361	11739304	11740361	1058	791	-2.01633	1.30511e-08	3.30071e-08
AT2G36010	E2F3	-	2:15119542-15123184	15119542	15123184	3643	2087	-2.01614	2.45333e-18	1.20579e-17
AT2G30766	AT2G30766	-	2:13107909-13108863	13107909	13108863	955	600	-2.01601	4.35779e-28	3.69191e-27
AT1G54385	AT1G54385	-	1:20301126-20303885	20301126	20303885	2760	2108	-2.01463	1.53822e-31	1.54342e-30
AT1G01380	ETC1	-	1:147153-147942	147153	147942	790	568	-2.01124	6.20931e-08	1.48663e-07
AT5G25010	AT5G25010	-	5:8616009-8616869	8616009	8616869	861	861	-2.01048	1.99696e-18	9.878e-18
AT3G02820	AT3G02820	-	3:611524-613448	611524	613448	1925	1052	-2.00964	1.70984e-14	6.64582e-14
AT2G26250	KCS10	-	2:11170418-11173142	11170418	11173142	2725	2117	-2.00885	6.5496e-47	1.2627e-45
AT1G56700	AT1G56700	-	1:21256176-21257973	21256176	21257973	1798	1265	-2.00644	2.58483e-60	8.07259e-59
AT4G39790	AT4G39790	-	4:18462190-18464824	18462190	18464824	2635	2340	-2.00598	1.54828e-10	4.55707e-10
AT5G25020	AT5G25020	-	5:8618567-8619465	8618567	8619465	899	810	-2.00544	2.2832e-11	7.12664e-11
AT1G77590	LACS9	-	1:29148256-29152315	29148256	29152315	4060	2516	-2.00474	4.70439e-23	3.07456e-22
AT3G47570	AT3G47570	-	3:17527507-17530929	17527507	17530929	3423	3318	-2.00462	4.49737e-23	2.9404e-22
AT1G73550	AT1G73550	-	1:27647756-27648536	27647756	27648536	781	541	-2.00433	2.08964e-09	5.61093e-09
AT2G46450	ATCNGC12	-	2:19065716-19069569	19065716	19069569	3854	3199	-2.0038	4.63566e-50	9.97049e-49
AT3G43670	AT3G43670	-	3:15567099-15569901	15567099	15569901	2803	2276	-2.00301	1.31738e-24	9.43289e-24
AT3G57830	AT3G57830	-	3:21419517-21422546	21419517	21422546	3030	2476	-2.00232	9.82828e-22	5.93518e-21
AT3G57780	AT3G57780	-	3:21399766-21402899	21399766	21402899	3134	2237	-2.00224	1.69195e-25	1.26333e-24
AT2G16440	MCM4	-	2:7126357-7130685	7126357	7130685	4329	2743	-2.00173	1.14155e-29	1.03943e-28
AT4G34640	SQS1	-	4:16538282-16541926	16538282	16541926	3645	1711	-2.00139	2.96115e-44	5.07835e-43
AT1G64860	SIGA	-	1:24097913-24100952	24097913	24100952	3040	2005	-1.99837	1.26878e-14	4.97261e-14
AT5G42110	AT5G42110	-	5:16831728-16832279	16831728	16832279	552	465	-1.99818	2.91656e-25	2.15678e-24
AT5G67100	ICU2	-	5:26776994-26785104	26776994	26785104	8111	4575	-1.99739	2.23221e-17	1.03937e-16
AT1G73250	ATFX	-	1:27545006-27546435	27545006	27546435	1430	1254	-1.99657	2.32217e-14	8.93758e-14
AT3G57450	AT3G57450	-	3:21261934-21262622	21261934	21262622	689	689	-1.99453	4.51897e-31	4.41898e-30
AT2G19110	HMA4	-	2:8278881-8286445	8278881	8286445	7565	3812	-1.99427	1.83308e-41	2.8131e-40
AT5G10240	ASN3	-	5:3212688-3216466	3212688	3216466	3779	2035	-1.99185	3.07108e-48	6.20337e-47
AT4G19420	AT4G19420	-	4:10587166-10590588	10587166	10590588	3423	1853	-1.99173	2.94265e-12	9.76481e-12
AT3G48131	AT3G48131	-	3:17775456-17775587	17775456	17775587	132	132	-1.99151	9.65095e-09	2.46807e-08
AT5G11160	APT5	-	5:3550520-3552207	3550520	3552207	1688	1051	-1.98995	5.64896e-36	6.88905e-35
AT2G01913	AT2G01913	-	2:421624-422626	421624	422626	1003	777	-1.98874	5.48842e-06	1.10796e-05
AT5G22810	AT5G22810	-	5:7621568-7623367	7621568	7623367	1800	1014	-1.98828	1.49338e-16	6.60186e-16
AT2G05765	AT2G05765	-	2:2184567-2184645	2184567	2184645	79	79	-1.98782	4.02687e-23	2.63993e-22
AT3G56170	CAN	-	3:20842145-20844476	20842145	20844476	2332	1440	-1.98455	8.17987e-08	1.94249e-07
AT2G16500	ARGDC	-	2:7150622-7153339	7150622	7153339	2718	2718	-1.98357	2.78283e-70	1.26287e-68
AT1G62180	PRH	-	1:22975530-22977625	22975530	22977625	2096	1789	-1.98234	6.55961e-71	3.03373e-69
AT1G29965	AT1G29965	AT1G29970	1:10498310-10499462	10498310	10499462	1153	774	-1.98207	2.62815e-48	5.31501e-47
AT1G55205	AT1G55205	-	1:20594559-20596034	20594559	20596034	1476	888	-1.9816	4.40435e-39	6.17156e-38
AT1G70000	AT1G70000	-	1:26363093-26364759	26363093	26364759	1667	1424	-1.97917	6.19397e-40	9.00734e-39
AT1G28390	AT1G28390	-	1:9966186-9968301	9966186	9968301	2116	1928	-1.97868	1.72459e-17	8.08649e-17
AT4G37630	CYCD5;1	-	4:17679279-17681202	17679279	17681202	1924	1604	-1.97726	1.73745e-21	1.03848e-20
AT4G12050	AT4G12050	-	4:7219824-7221328	7219824	7221328	1505	1505	-1.97705	9.60976e-18	4.57822e-17
AT5G44460	CML43	-	5:17917226-17917983	17917226	17917983	758	758	-1.97687	2.96907e-43	4.8841e-42
AT5G51750	ATSBT1.3	-	5:21020207-21022781	21020207	21022781	2575	2575	-1.97526	4.92764e-56	1.29519e-54
AT4G23750	CRF2	-	4:12376194-12378024	12376194	12378024	1831	1831	-1.97504	2.14108e-66	8.18104e-65
AT5G06940	AT5G06940	-	5:2148078-2150771	2148078	2150771	2694	2619	-1.97481	4.59378e-14	1.73414e-13
AT4G35100	PIP2;7	-	4:16708552-16710289	16708552	16710289	1738	1294	-1.97388	1.74744e-52	4.07423e-51
AT3G53900	UPP	-	3:19956656-19959041	19956656	19959041	2386	1273	-1.97023	3.22374e-61	1.03545e-59
AT4G38950	AT4G38950	-	4:18154395-18159936	18154395	18159936	5542	3304	-1.97023	6.12724e-11	1.85971e-10
AT1G27880	AT1G27880	-	1:9708924-9714089	9708924	9714089	5166	2940	-1.969	9.76169e-13	3.35437e-12
AT5G07040	AT5G07040	-	5:2190344-2190823	2190344	2190823	480	480	-1.96785	5.97755e-06	1.20226e-05
AT3G24480	AT3G24480	-	3:8901154-8902638	8901154	8902638	1485	1485	-1.96617	2.79287e-20	1.5592e-19
AT2G47000	PGP4	-	2:19309868-19315241	19309868	19315241	5374	4161	-1.96283	3.22396e-38	4.33455e-37
AT1G52220	AT1G52220	-	1:19453569-19454697	19453569	19454697	1129	764	-1.9618	5.47691e-34	6.10321e-33
AT2G40330	PYL6	-	2:16844864-16845934	16844864	16845934	1071	1071	-1.96149	2.94181e-15	1.20601e-14
AT3G47420	ATPS3	-	3:17472342-17475258	17472342	17475258	2917	2016	-1.96111	4.51841e-45	8.0087e-44
AT2G30970	ASP1	-	2:13178840-13181931	13178840	13181931	3092	1710	-1.96087	7.19837e-47	1.38148e-45
AT2G39705	RTFL8	-	2:16556856-16557577	16556856	16557577	722	722	-1.95752	1.44962e-29	1.31288e-28
AT5G62960	AT5G62960	-	5:25269282-25271641	25269282	25271641	2360	1314	-1.95684	3.7075e-08	9.04409e-08
AT5G65683	AT5G65683	-	5:26261320-26263783	26261320	26263783	2464	2385	-1.95545	2.68525e-12	8.95277e-12
AT3G23800	SBP3	-	3:8581654-8583835	8581654	8583835	2182	1621	-1.95508	2.8944e-41	4.41383e-40
AT4G10380	NLM6	-	4:6431236-6434822	6431236	6434822	3587	1521	-1.95489	4.17534e-64	1.48479e-62
AT5G51560	AT5G51560	-	5:20945685-20948854	20945685	20948854	3170	2406	-1.95417	7.16719e-47	1.37706e-45
AT1G75190	AT1G75190	-	1:28219382-28220227	28219382	28220227	846	846	-1.95352	4.46877e-37	5.73052e-36
AT1G09210	CRT1b	-	1:2972842-2976750	2972842	2976750	3909	1745	-1.95298	9.26047e-55	2.35011e-53
AT3G61310	AT3G61310	-	3:22690596-22692834	22690596	22692834	2239	1657	-1.95191	8.29232e-22	5.03081e-21
AT4G26760	MAP65-2	-	4:13478592-13481808	13478592	13481808	3217	2161	-1.95119	1.78528e-43	2.97143e-42
AT1G29090	AT1G29090	-	1:10162983-10164452	10162983	10164452	1470	1255	-1.95055	1.14711e-15	4.81096e-15
AT2G32500	AT2G32500	-	2:13794426-13797227	13794426	13797227	2802	1883	-1.94939	5.50345e-14	2.06786e-13
AT1G74710	ICS1	-	1:28070295-28074148	28070295	28074148	3854	2151	-1.94909	1.19431e-12	4.07419e-12
AT3G50630	KRP2	-	3:18800380-18801587	18800380	18801587	1208	979	-1.94759	1.32692e-19	7.0966e-19
AT5G04160	AT5G04160	-	5:1142782-1144912	1142782	1144912	2131	1316	-1.94664	3.50478e-20	1.94446e-19
AT4G16390	SVR7	-	4:9257958-9260277	9257958	9260277	2320	2320	-1.94597	1.98031e-52	4.61083e-51
AT2G03590	ATUPS1	-	2:1094757-1096968	1094757	1096968	2212	1802	-1.94515	8.46126e-38	1.12069e-36
AT5G57420	IAA33	-	5:23270024-23270990	23270024	23270990	967	547	-1.94238	2.86974e-07	6.5098e-07
AT1G60160	AT1G60160	-	1:22188114-22191395	22188114	22191395	3282	2700	-1.94211	1.93349e-61	6.24582e-60
AT5G01600	FER1	-	5:227953-230051	227953	230051	2099	1421	-1.94176	1.17023e-48	2.40979e-47
AT1G76650	CML38	-	1:28766750-28768138	28766750	28768138	1389	798	-1.94163	1.12469e-05	2.21008e-05
AT3G52940	ELL1	-	3:19630198-19633296	19630198	19633296	3099	1469	-1.94091	1.41521e-31	1.42676e-30
AT2G40380	PRA1.B2	-	2:16864495-16865442	16864495	16865442	948	948	-1.94016	1.02998e-43	1.73306e-42
AT3G07120	AT3G07120	-	3:2254479-2255742	2254479	2255742	1264	1264	-1.93984	1.40909e-15	5.8893e-15
AT2G24230	AT2G24230	-	2:10301817-10304812	10301817	10304812	2996	2996	-1.93836	3.19709e-17	1.47378e-16
AT2G43138	AT2G43138	-	2:17923238-17923316	17923238	17923316	79	79	-1.93831	0.00185793	0.00290015
AT1G11545	XTH8	-	1:3878550-3880361	3878550	3880361	1812	1132	-1.93747	4.70015e-10	1.33377e-09
AT1G20340	DRT112	-	1:7042429-7043363	7042429	7043363	935	935	-1.93691	1.72646e-26	1.35295e-25
AT2G14960	GH3.1	-	2:6451372-6453670	6451372	6453670	2299	2060	-1.93655	1.39108e-10	4.1094e-10
AT2G23600	MES2	-	2:10042199-10043673	10042199	10043673	1475	950	-1.93575	8.38909e-06	1.66552e-05
AT2G45340	AT2G45340	-	2:18691722-18694725	18691722	18694725	3004	2352	-1.93488	4.40494e-13	1.55338e-12
AT2G42220	AT2G42220	-	2:17592038-17593500	17592038	17593500	1463	967	-1.93379	2.01817e-07	4.63649e-07
AT3G60750	AT3G60750	-	3:22453696-22457152	22453696	22457152	3457	2862	-1.93164	4.62034e-47	8.96886e-46
AT3G07390	AIR12	-	3:2365301-2366496	2365301	2366496	1196	1196	-1.93141	1.19564e-36	1.49916e-35
AT1G29195	AT1G29195	-	1:10202536-10203396	10202536	10203396	861	861	-1.93027	1.8677e-13	6.75524e-13
AT5G53045	AT5G53045	-	5:21508385-21509609	21508385	21509609	1225	580	-1.92977	9.08965e-24	6.18659e-23
AT2G01420	PIN4	-	2:180105-183328	180105	183328	3224	2353	-1.92756	3.01235e-16	1.30945e-15
AT4G25240	SKS1	-	4:12930402-12933892	12930402	12933892	3491	2236	-1.92751	5.60765e-29	4.9567e-28
AT3G05690	UNE8	-	3:1676546-1678932	1676546	1678932	2387	1464	-1.92751	4.06774e-35	4.7949e-34
AT4G38970	FBA2	-	4:18163496-18165762	18163496	18165762	2267	1522	-1.92746	8.90115e-20	4.8122e-19
AT4G00860	ATOZI1	-	4:359315-360493	359315	360493	1179	596	-1.92702	1.12343e-35	1.35443e-34
AT1G69588	CLE45	-	1:26178042-26178925	26178042	26178925	884	884	-1.92686	9.6168e-08	2.27034e-07
AT4G34419	AT4G34419	-	4:16456519-16457225	16456519	16457225	707	707	-1.92655	3.49344e-17	1.60514e-16
AT1G62780	AT1G62780	-	1:23249145-23251105	23249145	23251105	1961	957	-1.92508	5.81813e-49	1.20987e-47
AT1G26230	AT1G26230	AT1G26218;AT1G26235	1:9072256-9076743	9072256	9076743	4488	2537	-1.92377	4.67449e-27	3.75534e-26
AT1G27030	AT1G27030	-	1:9381803-9383984	9381803	9383984	2182	1244	-1.92238	4.21327e-14	1.59513e-13
AT3G63450	AT3G63450	-	3:23426749-23429154	23426749	23429154	2406	1851	-1.92182	5.07596e-34	5.66386e-33
AT1G68360	AT1G68360	-	1:25621678-25622412	25621678	25622412	735	735	-1.92118	2.01666e-15	8.34827e-15
AT3G52748	AT3G52748	-	3:19548972-19549589	19548972	19549589	618	436	-1.92096	0.000675068	0.00110801
AT3G62060	AT3G62060	-	3:22979955-22982944	22979955	22982944	2990	1638	-1.92004	3.75954e-19	1.95628e-18
AT2G03240	AT2G03240	-	2:973413-977337	973413	977337	3925	2752	-1.91988	5.69756e-39	7.93766e-38
AT4G18440	AT4G18440	-	4:10186131-10188909	10186131	10188909	2779	1942	-1.91968	1.38889e-44	2.41621e-43
AT1G01200	ATRABA3	-	1:86515-88213	86515	88213	1699	982	-1.91923	5.69107e-12	1.85255e-11
AT4G30960	CIPK6	-	4:15067053-15069010	15067053	15069010	1958	1958	-1.9182	8.20982e-40	1.18776e-38
AT3G16300	AT3G16300	-	3:5525491-5526207	5525491	5526207	717	639	-1.91615	4.09817e-16	1.76828e-15
AT2G33210	HSP60-2	-	2:14074870-14078744	14074870	14078744	3875	2157	-1.91586	6.69688e-29	5.89792e-28
AT5G24314	PDE225	-	5:8277700-8279240	8277700	8279240	1541	701	-1.91111	1.42748e-52	3.35131e-51
AT2G46160	AT2G46160	-	2:18963083-18963885	18963083	18963885	803	803	-1.91094	6.59422e-10	1.85323e-09
AT2G40460	AT2G40460	-	2:16896907-16901280	16896907	16901280	4374	2077	-1.91034	1.07429e-20	6.15171e-20
AT3G27230	AT3G27230	-	3:10053929-10055695	10053929	10055695	1767	1618	-1.91014	6.50065e-67	2.54714e-65
AT3G12930	AT3G12930	-	3:4128407-4129956	4128407	4129956	1550	1115	-1.90941	2.40558e-57	6.5465e-56
AT3G21750	UGT71B1	-	3:7664345-7666195	7664345	7666195	1851	1851	-1.90776	2.9062e-23	1.91786e-22
AT3G10100	AT3G10100	-	3:3111778-3115437	3111778	3115437	3660	3015	-1.90755	4.43073e-17	2.02208e-16
AT5G46960	AT5G46960	-	5:19062174-19062780	19062174	19062780	607	607	-1.90704	7.98202e-10	2.22333e-09
AT5G60670	AT5G60670	-	5:24380910-24381593	24380910	24381593	684	684	-1.90492	6.66866e-41	1.00606e-39
AT4G28750	PSAE-1	-	4:14202758-14203961	14202758	14203961	1204	698	-1.90473	6.52936e-13	2.27039e-12
AT3G16080	AT3G16080	-	3:5454818-5455927	5454818	5455927	1110	612	-1.90467	4.36313e-36	5.33632e-35
AT4G34680	GATA3	-	4:16553390-16554740	16553390	16554740	1351	1250	-1.90171	8.83002e-37	1.11625e-35
AT3G61460	BRH1	-	3:22741511-22742284	22741511	22742284	774	774	-1.90067	9.53154e-09	2.43938e-08
AT5G51550	EXL3	-	5:20939494-20940895	20939494	20940895	1402	1402	-1.90065	7.82734e-54	1.93421e-52
AT5G26280	AT5G26280	-	5:9208711-9210572	9208711	9210572	1862	1235	-1.89978	1.47364e-36	1.84091e-35
AT5G02890	AT5G02890	-	5:670065-671471	670065	671471	1407	1221	-1.89819	9.19099e-12	2.95435e-11
AT4G17880	AT4G17880	-	4:9933366-9935586	9933366	9935586	2221	2221	-1.89797	3.36068e-35	3.98363e-34
AT1G78300	GRF2	-	1:29461671-29463385	29461671	29463385	1715	1325	-1.89502	1.54816e-45	2.79975e-44
AT1G15260	AT1G15260	-	1:5249760-5250573	5249760	5250573	814	814	-1.89402	6.48107e-22	3.95049e-21
AT2G26550	HO2	-	2:11291218-11293445	11291218	11293445	2228	1379	-1.89399	2.23309e-31	2.22089e-30
AT1G01130	AT1G01130	-	1:61905-63811	61905	63811	1907	375	-1.89231	4.57848e-10	1.30121e-09
AT2G01755	AT2G01755	-	2:332194-332781	332194	332781	588	588	-1.89194	4.52486e-12	1.48234e-11
AT1G55330	AGP21	-	1:20648465-20648891	20648465	20648891	427	427	-1.89179	7.27276e-05	0.000132344
AT3G10110	MEE67	-	3:3116110-3117671	3116110	3117671	1562	930	-1.89119	1.72297e-53	4.19637e-52
AT5G39080	AT5G39080	-	5:15641658-15643161	15641658	15643161	1504	1504	-1.89098	1.2327e-31	1.24424e-30
AT1G01110	IQD18	-	1:52239-54692	52239	54692	2454	1851	-1.89081	1.38241e-41	2.137e-40
AT2G36310	URH1	-	2:15224497-15226872	15224497	15226872	2376	1445	-1.89029	1.80629e-18	8.9584e-18
AT2G03480	QUL2	-	2:1050842-1054613	1050842	1054613	3772	2718	-1.89012	1.37392e-23	9.24337e-23
AT2G29180	AT2G29180	-	2:12543023-12543835	12543023	12543835	813	701	-1.88929	7.97213e-37	1.01006e-35
AT1G56210	AT1G56210	-	1:21035618-21037211	21035618	21037211	1594	1384	-1.88922	6.52608e-25	4.75331e-24
AT3G10525	LGO	-	3:3281362-3282032	3281362	3282032	671	671	-1.88906	2.04238e-09	5.49885e-09
AT5G57920	ENODL10	-	5:23453599-23454397	23453599	23454397	799	725	-1.88735	6.04807e-10	1.70569e-09
AT2G23910	AT2G23910	-	2:10177834-10180064	10177834	10180064	2231	1258	-1.8849	1.06265e-15	4.46671e-15
AT3G13403	AT3G13403	AT3G13404	3:4358537-4358826	4358537	4358826	290	174	-1.88253	9.6273e-15	3.80751e-14
AT1G05190	emb2394	-	1:1502344-1503830	1502344	1503830	1487	935	-1.88069	1.91519e-48	3.90112e-47
AT1G32990	PRPL11	-	1:11955785-11957284	11955785	11957284	1500	856	-1.87905	2.04457e-49	4.31527e-48
AT2G32765	SUM5	-	2:13894862-13895582	13894862	13895582	721	616	-1.87849	1.88101e-07	4.33432e-07
AT1G80850	AT1G80850	-	1:30385449-30387522	30385449	30387522	2074	1392	-1.87835	2.53387e-15	1.04332e-14
AT3G22120	CWLP	-	3:7794957-7796310	7794957	7796310	1354	1354	-1.87807	3.30633e-17	1.52206e-16
AT1G03940	AT1G03940	-	1:1009542-1011056	1009542	1011056	1515	1515	-1.87595	3.17851e-21	1.87205e-20
AT1G67630	POLA2	-	1:25344440-25348406	25344440	25348406	3967	2115	-1.87433	3.41691e-22	2.11706e-21
AT2G40550	ETG1	-	2:16934834-16938201	16934834	16938201	3368	2031	-1.87411	1.17101e-22	7.4714e-22
AT3G04770	RPSAb	-	3:1309294-1310887	1309294	1310887	1594	1211	-1.8736	1.42394e-69	6.30969e-68
AT4G26960	AT4G26960	-	4:13538743-13539653	13538743	13539653	911	651	-1.87358	1.1149e-07	2.6222e-07
AT1G11125	AT1G11125	-	1:3718783-3719711	3718783	3719711	929	929	-1.873	4.20949e-09	1.10533e-08
AT5G56350	AT5G56350	-	5:22820006-22822766	22820006	22822766	2761	1982	-1.87246	2.84325e-60	8.83076e-59
AT4G20690	AT4G20690	-	4:11097242-11098024	11097242	11098024	783	417	-1.87239	7.81792e-10	2.18013e-09
AT1G04730	CTF18	-	1:1325296-1331086	1325296	1331086	5791	2921	-1.87198	1.04606e-10	3.12122e-10
AT3G25900	HMT-1	-	3:9480825-9482926	9480825	9482926	2102	1366	-1.87015	2.2377e-24	1.58153e-23
AT1G14800	AT1G14800	-	1:5099572-5102558	5099572	5102558	2987	1155	-1.87007	2.74236e-07	6.23003e-07
AT2G39470	PPL2	-	2:16476216-16477843	16476216	16477843	1628	1026	-1.86982	6.78458e-08	1.62001e-07
AT5G60210	RIP5	-	5:24243031-24245968	24243031	24245968	2938	2169	-1.86978	1.72747e-36	2.14849e-35
AT3G20840	PLT1	-	3:7300675-7303693	7300675	7303693	3019	2137	-1.86872	1.63692e-13	5.93833e-13
AT1G60190	AT1G60190	-	1:22198403-22200678	22198403	22200678	2276	2276	-1.86844	7.97157e-21	4.59118e-20
AT3G60070	AT3G60070	-	3:22183243-22186329	22183243	22186329	3087	1895	-1.86784	9.53035e-62	3.12031e-60
AT3G28200	AT3G28200	-	3:10518070-10519166	10518070	10519166	1097	1097	-1.86636	6.12915e-29	5.40355e-28
AT1G64090	RTNLB3	-	1:23789062-23790976	23789062	23790976	1915	1456	-1.862	6.18e-54	1.53385e-52
AT4G30470	AT4G30470	-	4:14894105-14896815	14894105	14896815	2711	1379	-1.86113	4.85941e-34	5.42939e-33
AT1G27450	ATAPT1	-	1:9531839-9534114	9531839	9534114	2276	1383	-1.86068	4.056e-40	5.9391e-39
AT5G09440	EXL4	-	5:2938347-2939461	2938347	2939461	1115	1115	-1.86066	4.51224e-13	1.5899e-12
AT3G57610	ADSS	-	3:21334284-21336674	21334284	21336674	2391	1779	-1.85929	3.78481e-39	5.32548e-38
AT1G56230	AT1G56230	-	1:21046009-21049194	21046009	21049194	3186	2596	-1.85891	1.16378e-23	7.87656e-23
AT2G43140	AT2G43140	-	2:17931525-17935686	17931525	17935686	4162	1150	-1.85695	3.3302e-07	7.51303e-07
AT3G05910	AT3G05910	-	3:1764318-1767620	1764318	1767620	3303	1819	-1.85611	1.27103e-44	2.21345e-43
AT1G05950	AT1G05950	-	1:1804401-1807471	1804401	1807471	3071	2056	-1.85561	6.48762e-11	1.96416e-10
AT5G43080	CYCA3;1	-	5:17293227-17294789	17293227	17294789	1563	1068	-1.85555	2.76742e-10	8.01027e-10
AT2G14247	AT2G14247	-	2:6034348-6034835	6034348	6034835	488	488	-1.85346	3.0272e-11	9.38144e-11
AT1G66620	AT1G66620	-	1:24852806-24854153	24852806	24854153	1348	1051	-1.85292	4.78901e-08	1.15822e-07
AT4G39150	AT4G39150	-	4:18233485-18236064	18233485	18236064	2580	1268	-1.85264	1.94218e-45	3.5011e-44
AT2G22230	AT2G22230	-	2:9449984-9451622	9449984	9451622	1639	916	-1.85256	8.95998e-36	1.08565e-34
AT5G17860	CAX7	-	5:5902394-5904380	5902394	5904380	1987	1987	-1.85091	1.45463e-14	5.6852e-14
AT2G32720	B5.N4	-	2:13876774-13878531	13876774	13878531	1758	728	-1.85051	6.45497e-57	1.73709e-55
AT2G06520	PSBX	-	2:2587729-2588358	2587729	2588358	630	630	-1.84945	5.52958e-34	6.15784e-33
AT4G17100	AT4G17100	-	4:9609910-9612676	9609910	9612676	2767	1731	-1.84819	3.79383e-24	2.63405e-23
AT2G27130	AT2G27130	-	2:11595292-11596542	11595292	11596542	1251	765	-1.84708	3.64181e-13	1.29072e-12
AT1G70710	CEL1	-	1:26659132-26663010	26659132	26663010	3879	1751	-1.84586	5.45423e-24	3.76064e-23
AT2G37260	WRKY44	-	2:15644840-15647065	15644840	15647065	2226	1816	-1.84417	6.43863e-12	2.08947e-11
AT4G15165	AT4G15165	-	4:8648832-8650382	8648832	8650382	1551	908	-1.84293	8.05744e-11	2.42425e-10
AT4G18590	AT4G18590	-	4:10236225-10237185	10236225	10237185	961	653	-1.8423	2.30651e-39	3.26714e-38
AT3G62030	ROC4	-	3:22973004-22975378	22973004	22975378	2375	1276	-1.84153	1.21505e-42	1.9532e-41
AT2G17660	AT2G17660	-	2:7673282-7673712	7673282	7673712	431	431	-1.83897	0.000219344	0.000379015
AT3G60660	AT3G60660	-	3:22421410-22423477	22421410	22423477	2068	1200	-1.83529	4.03257e-06	8.25484e-06
AT3G62630	AT3G62630	-	3:23163747-23165195	23163747	23165195	1449	1449	-1.83477	4.12819e-35	4.86276e-34
AT4G16660	AT4G16660	-	4:9376737-9381507	9376737	9381507	4771	3023	-1.83476	3.72174e-55	9.618e-54
AT4G30190	PMA2	-	4:14770499-14776058	14770499	14776058	5560	3405	-1.83424	1.81863e-42	2.90141e-41
AT1G53170	ATERF-8	-	1:19821337-19822252	19821337	19822252	916	916	-1.83268	6.15377e-07	1.35525e-06
AT5G59560	SRR1	-	5:24000556-24001957	24000556	24001957	1402	1402	-1.83252	4.81907e-31	4.69617e-30
AT3G61770	AT3G61770	-	3:22864543-22866407	22864543	22866407	1865	1106	-1.83116	3.09762e-48	6.24952e-47
AT1G70280	AT1G70280	-	1:26465893-26468706	26465893	26468706	2814	2046	-1.83093	2.3219e-51	5.25438e-50
AT3G28040	AT3G28040	-	3:10435057-10438391	10435057	10438391	3335	3256	-1.82998	1.06946e-39	1.53805e-38
AT4G35110	AT4G35110	-	4:16712462-16714953	16712462	16714953	2492	1716	-1.82987	1.01646e-23	6.89601e-23
AT2G24270	ALDH11A3	-	2:10327035-10329941	10327035	10329941	2907	2121	-1.82883	5.33199e-29	4.7229e-28
AT3G17390	MTO3	-	3:5952187-5954084	5952187	5954084	1898	1690	-1.82857	8.22527e-42	1.28559e-40
AT3G27865	AT3G27865	-	3:10328510-10328601	10328510	10328601	92	92	-1.8279	6.77339e-06	1.35524e-05
AT1G60890	AT1G60890	-	1:22412246-22417244	22412246	22417244	4999	3042	-1.82649	3.93973e-22	2.43297e-21
AT4G33960	AT4G33960	-	4:16277366-16277779	16277366	16277779	414	414	-1.82586	2.35079e-08	5.82434e-08
AT5G59860	AT5G59860	-	5:24113462-24114449	24113462	24114449	988	474	-1.82575	3.88675e-18	1.88946e-17
AT2G35742	AT2G35742	-	2:15027589-15027668	15027589	15027668	80	80	-1.82261	2.00211e-09	5.39474e-09
AT2G10940	AT2G10940	-	2:4310412-4312103	4310412	4312103	1692	1692	-1.82012	7.23154e-06	1.44366e-05
AT3G56950	SIP2	-	3:21078297-21079856	21078297	21079856	1560	1215	-1.81918	1.96308e-28	1.69449e-27
AT1G10030	ERG28	-	1:3273825-3275837	3273825	3275837	2013	743	-1.81872	4.12094e-33	4.42047e-32
AT5G62350	AT5G62350	-	5:25037426-25038362	25037426	25038362	937	937	-1.81777	4.61373e-45	8.1691e-44
AT3G02980	MCC1	-	3:670897-672215	670897	672215	1319	744	-1.81757	3.9915e-06	8.17473e-06
AT5G19730	AT5G19730	-	5:6670458-6673282	6670458	6673282	2825	1336	-1.81686	5.3173e-09	1.38556e-08
AT3G23390	AT3G23390	-	3:8375372-8376392	8375372	8376392	1021	541	-1.81599	1.9664e-31	1.96605e-30
AT5G42280	AT5G42280	-	5:16905202-16908007	16905202	16908007	2806	2368	-1.81587	4.26681e-14	1.61395e-13
AT5G11890	AT5G11890	-	5:3831664-3832944	3831664	3832944	1281	1281	-1.81579	8.905e-19	4.49418e-18
AT1G35320	AT1G35320	-	1:12959057-12962853	12959057	12962853	3797	1348	-1.81467	2.67955e-34	3.02379e-33
AT2G42660	AT2G42660	-	2:17767050-17768290	17767050	17768290	1241	815	-1.81365	2.51259e-19	1.32124e-18
AT5G14040	PHT3;1	-	5:4530643-4533070	4530643	4533070	2428	1649	-1.81266	3.34457e-40	4.91864e-39
AT1G12000	AT1G12000	-	1:4049896-4053835	4049896	4053835	3940	2072	-1.81236	4.29902e-40	6.2895e-39
AT5G64060	anac103	-	5:25633536-25635781	25633536	25635781	2246	1658	-1.81224	5.41625e-16	2.32104e-15
AT5G43020	AT5G43020	-	5:17255291-17257742	17255291	17257742	2452	2145	-1.81201	1.25114e-39	1.79172e-38
AT1G03502	AT1G03502	-	1:875358-875471	875358	875471	114	114	-1.81152	0.00160335	0.0025237
AT1G19450	AT1G19450	-	1:6731434-6734882	6731434	6734882	3449	1953	-1.81037	3.37014e-38	4.52389e-37
AT1G60870	MEE9	-	1:22409472-22410654	22409472	22410654	1183	1111	-1.80949	5.7763e-08	1.38669e-07
AT1G22640	MYB3	-	1:8006195-8007428	8006195	8007428	1234	1077	-1.80947	1.10679e-32	1.16437e-31
AT3G01120	MTO1	-	3:38759-41932	38759	41932	3174	2234	-1.80788	1.66256e-44	2.88047e-43
AT2G18650	MEE16	-	2:8086860-8088131	8086860	8088131	1272	1272	-1.80785	3.39063e-12	1.12162e-11
AT5G10160	AT5G10160	-	5:3185746-3187312	3185746	3187312	1567	886	-1.80726	4.57997e-40	6.69475e-39
AT5G59970	AT5G59970	-	5:24146175-24146726	24146175	24146726	552	552	-1.80631	7.78111e-32	7.92961e-31
AT4G17098	AT4G17098	-	4:9608632-9611700	9608632	9611700	3069	1709	-1.80513	3.74377e-23	2.45814e-22
AT3G47965	AT3G47965	-	3:17707918-17708909	17707918	17708909	992	513	-1.80495	1.55267e-08	3.90173e-08
AT1G78860	AT1G78860	-	1:29646168-29647499	29646168	29647499	1332	1332	-1.80488	1.9311e-08	4.82404e-08
AT1G73010	PS2	-	1:27464572-27466256	27464572	27466256	1685	1172	-1.80471	1.07289e-05	2.11344e-05
AT1G66060	AT1G66060	-	1:24593915-24595544	24593915	24595544	1630	1630	-1.80431	4.68805e-10	1.33123e-09
AT3G13404	AT3G13404	AT3G13403	3:4358179-4359007	4358179	4359007	829	451	-1.80352	4.09244e-15	1.66201e-14
AT4G02380	SAG21	-	4:1046204-1046997	1046204	1046997	794	698	-1.80294	1.62013e-26	1.2708e-25
AT5G55790	AT5G55790	-	5:22580670-22581335	22580670	22581335	666	666	-1.80285	1.81636e-26	1.42274e-25
AT2G42770	AT2G42770	-	2:17798285-17800006	17798285	17800006	1722	1128	-1.80122	8.05773e-34	8.89715e-33
AT1G28290	AGP31	-	1:9889125-9890993	9889125	9890993	1869	1436	-1.80022	1.0418e-20	5.97174e-20
AT4G10450	AT4G10450	-	4:6462953-6464544	6462953	6464544	1592	919	-1.80021	9.35958e-43	1.51318e-41
AT3G21200	PGR7	-	3:7436026-7438011	7436026	7438011	1986	1185	-1.79965	9.5444e-55	2.41853e-53
AT1G11120	AT1G11120	-	1:3715184-3717320	3715184	3717320	2137	609	-1.79949	1.54909e-17	7.28578e-17
AT4G20940	AT4G20940	-	4:11202728-11206280	11202728	11206280	3553	3176	-1.79907	1.19244e-34	1.36751e-33
AT2G04039	AT2G04039	-	2:1333262-1334566	1333262	1334566	1305	1009	-1.79869	1.91507e-20	1.08199e-19
AT2G22100	AT2G22100	-	2:9392210-9393562	9392210	9393562	1353	1353	-1.79805	2.19147e-44	3.77749e-43
AT3G57560	NAGK	-	3:21310825-21312312	21310825	21312312	1488	1488	-1.79571	4.00973e-38	5.36599e-37
AT3G45230	AT3G45230	-	3:16569051-16569827	16569051	16569827	777	777	-1.79341	1.34015e-14	5.24864e-14
AT5G15948	CPuORF10	AT5G15950	5:5205871-5208036	5205871	5208036	2166	1802	-1.79337	2.88675e-12	9.58871e-12
AT5G15950	AT5G15950	AT5G15948	5:5205869-5208036	5205869	5208036	2168	2053	-1.79337	2.8748e-12	9.55089e-12
AT4G37910	mtHsc70-1	-	4:17825080-17828180	17825080	17828180	3101	2418	-1.79334	5.41921e-44	9.20993e-43
AT3G27380	SDH2-1	AT3G27360	3:10129610-10132760	10129610	10132760	3151	2526	-1.7933	3.76234e-44	6.43285e-43
AT1G54000	AT1G54000	-	1:20154169-20156419	20154169	20156419	2251	1609	-1.79156	2.96395e-53	7.14684e-52
AT2G01210	AT2G01210	-	2:119441-121846	119441	121846	2406	2331	-1.7915	1.8896e-19	1.00299e-18
AT4G28730	AT4G28730	-	4:14199096-14200901	14199096	14200901	1806	792	-1.79119	2.6573e-09	7.07456e-09
AT3G51380	IQD20	-	3:19074036-19074426	19074036	19074426	391	312	-1.78907	0.000206925	0.000358544
AT1G12015	AT1G12015	-	1:4058487-4058576	4058487	4058576	90	90	-1.78859	0.00210859	0.00327181
AT5G44210	ERF9	-	5:17806472-17807534	17806472	17807534	1063	1063	-1.78836	2.45888e-13	8.81997e-13
AT3G61640	AtAGP20	-	3:22810041-22810747	22810041	22810747	707	585	-1.78835	8.52117e-19	4.30689e-18
AT3G44430	AT3G44430	-	3:16068257-16069750	16068257	16069750	1494	1494	-1.78769	7.5641e-31	7.29974e-30
AT5G63310	NDPK2	-	5:25371904-25373861	25371904	25373861	1958	937	-1.78759	1.14039e-36	1.43306e-35
AT4G30980	LRL2	-	4:15079243-15081657	15079243	15081657	2415	1230	-1.78684	5.30351e-11	1.61752e-10
AT4G39970	AT4G39970	-	4:18536538-18538506	18536538	18538506	1969	1168	-1.78662	1.32771e-22	8.4331e-22
AT4G21620	AT4G21620	-	4:11491482-11492167	11491482	11492167	686	686	-1.78501	7.45898e-28	6.2566e-27
AT5G16000	NIK1	-	5:5224143-5227288	5224143	5227288	3146	2323	-1.78287	8.79773e-38	1.16434e-36
AT2G24762	AtGDU4	-	2:10559384-10560175	10559384	10560175	792	792	-1.78251	2.03904e-07	4.68378e-07
AT5G43700	ATAUX2-11	-	5:17550233-17551581	17550233	17551581	1349	1168	-1.78245	1.97748e-32	2.06114e-31
AT2G18162	CPuORF1	AT2G18160	2:7898012-7899242	7898012	7899242	1231	1231	-1.78212	1.01628e-22	6.50626e-22
AT2G18160	ATBZIP2	AT2G18162	2:7898012-7899242	7898012	7899242	1231	1231	-1.78212	1.02063e-22	6.53166e-22
AT5G37790	AT5G37790	-	5:15008172-15011152	15008172	15011152	2981	2047	-1.78195	6.16078e-14	2.30716e-13
AT2G40230	AT2G40230	-	2:16803092-16804741	16803092	16804741	1650	1650	-1.78181	1.03845e-14	4.0936e-14
AT5G63980	RON1	-	5:25609812-25611933	25609812	25611933	2122	1383	-1.78174	3.14846e-54	7.89539e-53
AT3G08920	AT3G08920	-	3:2712236-2713269	2712236	2713269	1034	835	-1.78162	8.20692e-20	4.44824e-19
AT5G67560	ARLA1D	-	5:26950309-26952211	26950309	26952211	1903	1123	-1.77963	4.11829e-24	2.85464e-23
AT2G33250	AT2G33250	-	2:14097432-14098711	14097432	14098711	1280	955	-1.77798	3.62252e-11	1.11671e-10
AT5G39320	AT5G39320	-	5:15742762-15744943	15742762	15744943	2182	1792	-1.77785	3.19812e-15	1.30728e-14
AT3G02230	RGP1	-	3:415393-417547	415393	417547	2155	1387	-1.77737	2.4956e-48	5.05299e-47
AT5G38520	AT5G38520	-	5:15421573-15423431	15421573	15423431	1859	1354	-1.77662	8.91353e-11	2.67185e-10
AT5G57270	AT5G57270	-	5:23200614-23203792	23200614	23203792	3179	1999	-1.77645	1.98946e-36	2.46888e-35
AT5G14660	PDF1B	-	5:4726641-4728746	4726641	4728746	2106	1288	-1.77626	2.71335e-59	8.02951e-58
AT2G17630	AT2G17630	-	2:7666585-7668065	7666585	7668065	1481	1481	-1.77547	9.98909e-31	9.59077e-30
AT5G40650	SDH2-2	-	5:16281404-16283527	16281404	16283527	2124	1132	-1.77402	3.52333e-58	9.95648e-57
AT3G24440	VRN5	-	3:8876027-8878171	8876027	8878171	2145	1989	-1.77314	2.1886e-48	4.44202e-47
AT2G14860	AT2G14860	-	2:6387624-6389628	6387624	6389628	2005	1020	-1.77289	1.09267e-20	6.25064e-20
AT1G60090	BGLU4	-	1:22155582-22158065	22155582	22158065	2484	1539	-1.7715	1.883e-41	2.8871e-40
AT2G33320	AT2G33320	-	2:14119526-14122094	14119526	14122094	2569	2569	-1.77143	1.14795e-13	4.22144e-13
AT4G34420	AT4G34420	-	4:16458068-16460652	16458068	16460652	2585	1517	-1.77028	5.08243e-16	2.18462e-15
AT1G68560	ATXYL1	-	1:25734182-25738002	25734182	25738002	3821	3106	-1.76942	8.79833e-35	1.01937e-33
AT1G32190	AT1G32190	-	1:11592955-11595982	11592955	11595982	3028	1624	-1.76916	2.62733e-25	1.94544e-24
AT5G28913	SADHU4-1	-	5:10933823-10934730	10933823	10934730	908	908	-1.76881	3.90376e-07	8.74408e-07
AT4G39090	RD19	-	4:18215556-18217482	18215556	18217482	1927	1533	-1.76815	7.44148e-36	9.04898e-35
AT5G27110	AT5G27110	-	5:9538572-9540647	9538572	9540647	2076	2076	-1.76794	6.38132e-14	2.38763e-13
AT5G22440	AT5G22440	-	5:7435076-7436686	7435076	7436686	1611	1106	-1.76718	9.3102e-41	1.39463e-39
AT5G14000	anac084	-	5:4518008-4519300	4518008	4519300	1293	1056	-1.76688	7.22179e-14	2.69555e-13
AT5G59850	AT5G59850	-	5:24112200-24113617	24112200	24113617	1418	803	-1.76619	3.80536e-38	5.10003e-37
AT2G45190	AFO	-	2:18628265-18630712	18628265	18630712	2448	1035	-1.76591	3.41154e-62	1.139e-60
AT3G47348	AT3G47348	-	3:17445963-17446047	17445963	17446047	85	85	-1.76562	6.59686e-22	4.01818e-21
AT5G39580	AT5G39580	-	5:15847078-15849108	15847078	15849108	2031	1248	-1.76497	4.02261e-29	3.58184e-28
AT3G15680	AT3G15680	-	3:5315001-5316466	5315001	5316466	1466	916	-1.76427	1.70362e-24	1.21267e-23
AT4G36250	ALDH3F1	-	4:17150869-17153578	17150869	17153578	2710	1812	-1.763	3.83586e-45	6.82033e-44
AT2G43139	AT2G43139	-	2:17923399-17923477	17923399	17923477	79	79	-1.7629	0.00200946	0.00312659
AT2G47240	CER8	-	2:19392558-19397831	19392558	19397831	5274	2483	-1.7621	5.08368e-38	6.76504e-37
AT2G16430	PAP10	-	2:7120419-7122832	7120419	7122832	2414	1645	-1.76183	2.58824e-43	4.27009e-42
AT4G25420	GA5	-	4:12990884-12992458	12990884	12992458	1575	1281	-1.76169	1.87218e-14	7.25844e-14
AT2G32230	PRORP1	-	2:13679529-13682236	13679529	13682236	2708	1942	-1.76138	6.96315e-44	1.17865e-42
AT2G21250	AT2G21250	-	2:9103181-9105187	9103181	9105187	2007	1310	-1.75999	2.39599e-40	3.54519e-39
AT2G34170	AT2G34170	-	2:14428215-14430860	14428215	14430860	2646	1992	-1.75856	4.0031e-12	1.31727e-11
AT3G46550	SOS5	-	3:17136456-17137874	17136456	17137874	1419	1419	-1.75719	9.19785e-19	4.63921e-18
AT1G69700	HVA22C	-	1:26220238-26221825	26220238	26221825	1588	816	-1.75527	3.63373e-08	8.87564e-08
AT1G72500	AT1G72500	-	1:27295336-27298556	27295336	27298556	3221	2271	-1.75388	1.5652e-09	4.25676e-09
AT3G17100	AT3G17100	-	3:5831194-5832419	5831194	5832419	1226	1226	-1.75313	6.79857e-19	3.47252e-18
AT1G15550	GA4	-	1:5344478-5346166	5344478	5346166	1689	1256	-1.75207	1.42876e-11	4.52472e-11
AT3G13620	AT3G13620	-	3:4450745-4452624	4450745	4452624	1880	1664	-1.75176	1.02109e-18	5.13945e-18
AT1G09590	AT1G09590	-	1:3106502-3107772	3106502	3107772	1271	708	-1.75049	3.96244e-31	3.88599e-30
AT2G19590	ATACO1	-	2:8475966-8477502	8475966	8477502	1537	1354	-1.74973	6.16212e-23	3.99947e-22
AT3G24840	AT3G24840	-	3:9066840-9070626	9066840	9070626	3787	2260	-1.74783	1.99335e-12	6.70136e-12
AT2G22496	MIR779A	-	2:9560761-9560923	9560761	9560923	163	163	-1.74719	4.21867e-06	8.61288e-06
AT1G07640	OBP2	-	1:2354354-2356227	2354354	2356227	1874	1850	-1.74705	1.5881e-08	3.98604e-08
AT4G19590	AT4G19590	-	4:10671199-10672290	10671199	10672290	1092	1038	-1.74606	1.74996e-07	4.04281e-07
AT4G37110	AT4G37110	-	4:17484125-17486276	17484125	17486276	2152	1551	-1.74575	6.93196e-10	1.94331e-09
AT2G47510	FUM1	-	2:19498368-19502246	19498368	19502246	3879	1850	-1.74491	1.17075e-40	1.7491e-39
AT2G33255	AT2G33255	-	2:14098778-14100593	14098778	14100593	1816	990	-1.74491	2.17483e-46	4.06778e-45
AT2G43840	UGT74F1	-	2:18157638-18159231	18157638	18159231	1594	1462	-1.74491	1.32367e-06	2.8308e-06
AT5G46710	AT5G46710	-	5:18952616-18954692	18952616	18954692	2077	1112	-1.74487	1.91687e-13	6.92865e-13
AT1G65230	AT1G65230	-	1:24229148-24230902	24229148	24230902	1755	1018	-1.74461	6.7706e-11	2.04836e-10
AT3G02180	SP1L3	-	3:404733-405656	404733	405656	924	824	-1.74401	6.48389e-24	4.45426e-23
AT1G01620	PIP1;3	-	1:225665-227302	225665	227302	1638	1308	-1.74334	4.51689e-28	3.81906e-27
AT4G22320	AT4G22320	-	4:11792874-11794778	11792874	11794778	1905	1154	-1.74264	9.20221e-37	1.16243e-35
AT1G76405	AT1G76405	-	1:28661884-28663789	28661884	28663789	1906	730	-1.74216	1.61368e-42	2.58174e-41
AT5G65640	bHLH093	-	5:26237055-26239084	26237055	26239084	2030	1318	-1.7414	1.49233e-55	3.88626e-54
AT3G23210	bHLH34	-	3:8283090-8285081	8283090	8285081	1992	1294	-1.74139	1.3165e-16	5.84891e-16
AT5G57170	AT5G57170	-	5:23162071-23163280	23162071	23163280	1210	846	-1.74085	8.07034e-27	6.42855e-26
AT3G15354	SPA3	-	3:5169095-5172837	5169095	5172837	3743	3103	-1.74083	3.64204e-16	1.57508e-15
AT4G02120	AT4G02120	-	4:940778-944291	940778	944291	3514	1960	-1.73843	1.02542e-13	3.78816e-13
AT1G35140	PHI-1	-	1:12851997-12853128	12851997	12853128	1132	1132	-1.73821	1.85987e-05	3.58076e-05
AT1G53520	AT1G53520	-	1:19976415-19977955	19976415	19977955	1541	974	-1.7379	1.39862e-08	3.52876e-08
AT1G23030	AT1G23030	-	1:8156646-8159077	8156646	8159077	2432	2173	-1.73732	6.86119e-10	1.925e-09
AT5G09660	PMDH2	-	5:2993444-2995675	2993444	2995675	2232	1601	-1.73697	8.41583e-27	6.69431e-26
AT5G06000	EIF3G2	-	5:1808150-1809853	1808150	1809853	1704	1057	-1.73634	4.16511e-25	3.06002e-24
AT1G57660	AT1G57660	-	1:21355520-21356537	21355520	21356537	1018	715	-1.73457	7.87113e-34	8.69677e-33
AT2G41780	AT2G41780	-	2:17428098-17428812	17428098	17428812	715	715	-1.73392	1.02551e-18	5.16017e-18
AT1G72470	ATEXO70D1	-	1:27283693-27285895	27283693	27285895	2203	2203	-1.73367	7.96094e-15	3.16623e-14
AT5G15022	AT5G15022	-	5:4866237-4866939	4866237	4866939	703	703	-1.73302	9.40394e-16	3.97355e-15
AT3G27220	AT3G27220	-	3:10051612-10053678	10051612	10053678	2067	1495	-1.73299	1.37674e-51	3.13227e-50
AT3G55410	AT3G55410	-	3:20541435-20546034	20541435	20546034	4600	3494	-1.73274	9.01247e-32	9.15142e-31
AT5G66330	AT5G66330	-	5:26500402-26501955	26500402	26501955	1554	1554	-1.7316	1.29237e-10	3.82581e-10
AT4G13020	MHK	-	4:7603101-7607155	7603101	7607155	4055	2280	-1.7316	9.4798e-37	1.19571e-35
AT5G44680	AT5G44680	-	5:18024215-18025991	18024215	18025991	1777	1406	-1.73088	1.86524e-08	4.66433e-08
AT1G56050	AT1G56050	-	1:20963719-20966341	20963719	20966341	2623	1500	-1.73015	5.64098e-40	8.22436e-39
AT2G30320	AT2G30320	-	2:12925728-12927896	12925728	12927896	2169	1533	-1.72909	8.01293e-20	4.34588e-19
AT3G25530	GHBDH	-	3:9271800-9273615	9271800	9273615	1816	1120	-1.72853	1.58634e-41	2.44109e-40
AT2G03350	AT2G03350	-	2:1019579-1021186	1019579	1021186	1608	809	-1.72794	1.50451e-27	1.24289e-26
AT1G22530	PATL2	-	1:7955493-7958442	7955493	7958442	2950	2448	-1.72718	1.31989e-40	1.97018e-39
AT4G38160	pde191	-	4:17902266-17904300	17902266	17904300	2035	1853	-1.72344	1.04945e-58	3.02109e-57
AT4G27720	AT4G27720	-	4:13831038-13833814	13831038	13833814	2777	1841	-1.72325	5.6171e-47	1.0854e-45
AT2G46170	AT2G46170	-	2:18965313-18967213	18965313	18967213	1901	1294	-1.7232	6.7626e-53	1.60773e-51
AT4G13170	AT4G13170	-	4:7654944-7656594	7654944	7656594	1651	862	-1.72285	7.59652e-39	1.04968e-37
AT5G01595	AT5G01595	-	5:227024-230013	227024	230013	2990	939	-1.72275	2.58685e-11	8.05512e-11
AT5G11420	AT5G11420	-	5:3644547-3647295	3644547	3647295	2749	1513	-1.72254	1.81925e-33	1.97908e-32
AT2G43490	AT2G43490	-	2:18054392-18058836	18054392	18058836	4445	3038	-1.72248	1.98214e-21	1.18057e-20
AT5G22930	AT5G22930	-	5:7668229-7669315	7668229	7669315	1087	717	-1.72246	8.14902e-06	1.61938e-05
AT1G58684	AT1G58684	-	1:21769762-21771229	21769762	21771229	1468	1126	-1.7223	1.57359e-35	1.88775e-34
AT1G04820	TUA4	-	1:1356191-1358386	1356191	1358386	2196	1703	-1.72218	1.77938e-27	1.46354e-26
AT2G20270	AT2G20270	-	2:8737705-8739677	8737705	8739677	1973	977	-1.72187	7.05228e-40	1.02291e-38
AT1G69420	AT1G69420	-	1:26093196-26097043	26093196	26097043	3848	2533	-1.72097	3.47157e-52	8.01682e-51
AT4G32690	GLB3	-	4:15765402-15767106	15765402	15767106	1705	856	-1.7207	1.18174e-23	7.99171e-23
AT1G19950	HVA22H	-	1:6924184-6926724	6924184	6926724	2541	1353	-1.71974	2.46207e-11	7.6708e-11
AT1G66180	AT1G66180	-	1:24647188-24648813	24647188	24648813	1626	1626	-1.71868	4.07305e-24	2.82559e-23
AT5G38480	GRF3	-	5:15409697-15411516	15409697	15411516	1820	1145	-1.71762	1.74879e-34	1.99071e-33
AT4G17810	AT4G17810	-	4:9906848-9907657	9906848	9907657	810	810	-1.7173	3.5061e-13	1.24419e-12
AT1G49470	AT1G49470	-	1:18310494-18311634	18310494	18311634	1141	1141	-1.71695	0.000697812	0.00114345
AT1G15000	scpl50	-	1:5168596-5170066	5168596	5170066	1471	1471	-1.71689	3.6994e-26	2.86589e-25
AT4G25780	AT4G25780	-	4:13121068-13121955	13121068	13121955	888	888	-1.71559	7.53067e-06	1.50214e-05
AT1G67060	AT1G67060	-	1:25036616-25039389	25036616	25039389	2774	1084	-1.71553	3.33471e-17	1.53429e-16
AT5G50560	AT5G50560	-	5:20579121-20579588	20579121	20579588	468	468	-1.71457	6.9494e-05	0.000126732
AT3G21700	SGP2	-	3:7644350-7646383	7644350	7646383	2034	1410	-1.71362	1.08365e-17	5.13663e-17
AT3G44610	AT3G44610	-	3:16188129-16192175	16188129	16192175	4047	1561	-1.71354	5.71852e-10	1.61464e-09
AT4G23610	AT4G23610	-	4:12314025-12314829	12314025	12314829	805	805	-1.71347	8.41099e-08	1.99541e-07
AT3G27960	AT3G27960	-	3:10380380-10383092	10380380	10383092	2713	2409	-1.71286	3.94402e-11	1.21338e-10
AT5G18650	AT5G18650	-	5:6217912-6220702	6217912	6220702	2791	1480	-1.71276	1.00569e-42	1.62164e-41
AT4G23030	AT4G23030	-	4:12072857-12074365	12072857	12074365	1509	1509	-1.71229	1.47842e-11	4.675e-11
AT2G27190	PAP12	-	2:11621222-11623618	11621222	11623618	2397	1768	-1.7122	1.6022e-47	3.15353e-46
AT5G25820	AT5G25820	-	5:8997183-9000329	8997183	9000329	3147	2247	-1.7118	1.56792e-22	9.91786e-22
AT1G09750	AT1G09750	-	1:3157501-3159148	3157501	3159148	1648	1578	-1.71168	6.61126e-26	5.06604e-25
AT3G61113	AT3G61113	-	3:22614582-22615415	22614582	22615415	834	300	-1.71165	0.00035062	0.000591956
AT5G20060	AT5G20060	-	5:6776167-6779614	6776167	6779614	3448	1540	-1.71162	1.60663e-34	1.83504e-33
AT1G53035	AT1G53035	-	1:19761700-19762551	19761700	19762551	852	852	-1.7115	7.50636e-08	1.78706e-07
AT5G56860	GNC	-	5:22989265-22991467	22989265	22991467	2203	1678	-1.70984	3.35873e-24	2.34737e-23
AT1G31835	AT1G31835	-	1:11423059-11423684	11423059	11423684	626	626	-1.7096	7.0697e-12	2.28725e-11
AT1G70210	CYCD1;1	-	1:26439864-26442829	26439864	26442829	2966	2020	-1.70916	1.15857e-18	5.80724e-18
AT2G47940	DEGP2	-	2:19617986-19622251	19617986	19622251	4266	2297	-1.70769	2.54288e-40	3.75924e-39
AT4G32915	AT4G32915	-	4:15885520-15886980	15885520	15886980	1461	745	-1.70763	5.30421e-47	1.02728e-45
AT5G66170	STR18	-	5:26447642-26448776	26447642	26448776	1135	793	-1.70763	2.05475e-38	2.79363e-37
AT5G08180	AT5G08180	-	5:2631516-2633850	2631516	2633850	2335	1051	-1.70603	8.84843e-38	1.16922e-36
AT5G39890	AT5G39890	-	5:15974393-15976270	15974393	15976270	1878	1238	-1.70576	1.84531e-26	1.44475e-25
AT3G47960	AT3G47960	-	3:17697942-17700833	17697942	17700833	2892	2157	-1.70446	2.01291e-47	3.94359e-46
AT2G31730	AT2G31730	-	2:13487568-13489679	13487568	13489679	2112	1020	-1.70381	7.47819e-07	1.63544e-06
AT3G04520	THA2	-	3:1217239-1219771	1217239	1219771	2533	1328	-1.70313	7.63733e-22	4.64024e-21
AT4G33530	KUP5	-	4:16126231-16130459	16126231	16130459	4229	2946	-1.70305	3.01462e-16	1.3101e-15
AT2G19680	AT2G19680	-	2:8501325-8502831	8501325	8502831	1507	662	-1.70169	2.35281e-46	4.39096e-45
AT3G22121	AT3G22121	-	3:7795606-7796327	7795606	7796327	722	698	-1.70125	1.00939e-09	2.79045e-09
AT1G02390	ATGPAT2	-	1:480852-483292	480852	483292	2441	1791	-1.70065	1.40124e-07	3.26704e-07
AT3G29230	AT3G29230	-	3:11188803-11190605	11188803	11190605	1803	1803	-1.69959	5.84895e-29	5.15921e-28
AT2G20630	PIA1	AT2G20625	2:8896912-8899898	8896912	8899898	2987	1758	-1.69953	4.39169e-27	3.53318e-26
AT1G65470	FAS1	-	1:24319670-24324064	24319670	24324064	4395	2869	-1.6995	1.12064e-14	4.40731e-14
AT4G14960	TUA6	-	4:8548492-8550453	8548492	8550453	1962	1764	-1.69943	4.79763e-31	4.68066e-30
AT3G06680	AT3G06680	-	3:2114151-2114948	2114151	2114948	798	655	-1.69897	7.28307e-30	6.69638e-29
AT3G42850	AT3G42850	-	3:14940114-14945291	14940114	14945291	5178	2895	-1.69895	6.27249e-40	9.11368e-39
AT5G15120	AT5G15120	-	5:4898737-4900581	4898737	4900581	1845	1189	-1.69712	6.80425e-45	1.1985e-43
AT4G39960	AT4G39960	-	4:18533755-18536618	18533755	18536618	2864	1716	-1.69633	4.57814e-48	9.17092e-47
AT4G02530	AT4G02530	-	4:1112141-1114029	1112141	1114029	1889	869	-1.69542	3.96711e-34	4.45301e-33
AT2G04450	ATNUDT6	-	2:1543320-1545462	1543320	1545462	2143	1311	-1.69362	1.11283e-06	2.39595e-06
AT4G24380	AT4G24380	-	4:12612535-12613719	12612535	12613719	1185	944	-1.69316	4.8074e-10	1.36398e-09
AT2G42260	PYM	-	2:17601955-17603633	17601955	17603633	1679	1204	-1.69301	4.48195e-07	9.99814e-07
AT4G34750	AT4G34750	-	4:16577404-16578452	16577404	16578452	1049	1049	-1.69267	1.65989e-19	8.84384e-19
AT2G41820	AT2G41820	-	2:17446744-17450071	17446744	17450071	3328	3256	-1.69243	1.21168e-23	8.18768e-23
AT2G31725	AT2G31725	-	2:13486317-13487445	13486317	13487445	1129	634	-1.69166	8.76442e-37	1.10878e-35
AT3G06360	AGP27	-	3:1928902-1929446	1928902	1929446	545	545	-1.69137	2.3729e-09	6.34636e-09
AT1G26340	CB5-A	-	1:9113900-9114977	9113900	9114977	1078	722	-1.69092	4.26253e-41	6.45366e-40
AT2G20721	AT2G20721	-	2:8931565-8931655	8931565	8931655	91	91	-1.69044	3.71304e-10	1.0631e-09
AT4G36180	AT4G36180	-	4:17120085-17123841	17120085	17123841	3757	3678	-1.68988	2.33792e-52	5.43598e-51
AT4G09731	AT4G09731	-	4:6139717-6139851	6139717	6139851	135	135	-1.68964	0.00727135	0.0105895
AT3G05165	AT3G05165	-	3:1457381-1462942	1457381	1462942	5562	2146	-1.68961	1.00592e-42	1.62164e-41
AT2G42840	PDF1	-	2:17826116-17827536	17826116	17827536	1421	1242	-1.68743	3.77807e-29	3.36764e-28
AT2G40150	TBL28	-	2:16775442-16777243	16775442	16777243	1802	1446	-1.68733	5.48941e-09	1.42843e-08
AT2G35470	AT2G35470	-	2:14908844-14909863	14908844	14909863	1020	817	-1.68726	1.59985e-11	5.04295e-11
AT5G27330	AT5G27330	-	5:9632703-9634980	9632703	9634980	2278	2278	-1.68697	2.12035e-36	2.62746e-35
AT3G51820	ATG4	-	3:19216003-19219057	19216003	19219057	3055	1585	-1.68691	2.19307e-26	1.71148e-25
AT3G13405	MIR169A	-	3:4359012-4359202	4359012	4359202	191	191	-1.68518	1.55298e-06	3.29994e-06
AT1G26840	ORC6	-	1:9298751-9300699	9298751	9300699	1949	1022	-1.685	7.97022e-10	2.22077e-09
AT3G55750	AT3G55750	-	3:20698553-20700067	20698553	20700067	1515	656	-1.68437	2.09631e-33	2.27755e-32
AT2G41100	ATCAL4	-	2:17137829-17139612	17137829	17139612	1784	1400	-1.68427	8.47934e-05	0.000153245
AT1G55140	AT1G55140	-	1:20572405-20574348	20572405	20574348	1944	832	-1.68311	4.52471e-43	7.37149e-42
AT5G48360	AT5G48360	-	5:19595657-19598492	19595657	19598492	2836	2569	-1.68265	3.49457e-31	3.43511e-30
AT5G02550	AT5G02550	-	5:573054-573558	573054	573558	505	505	-1.68063	1.14091e-09	3.13867e-09
AT4G12060	AT4G12060	-	4:7228007-7229941	7228007	7229941	1935	1031	-1.68009	8.60458e-50	1.83669e-48
AT1G13230	AT1G13230	-	1:4520631-4522544	4520631	4522544	1914	1428	-1.68005	3.76004e-07	8.43408e-07
AT1G28600	AT1G28600	-	1:10051001-10053117	10051001	10053117	2117	1544	-1.67873	6.00259e-07	1.32316e-06
AT5G50420	AT5G50420	-	5:20530206-20532856	20530206	20532856	2651	2169	-1.67799	1.3805e-11	4.37761e-11
AT5G42070	AT5G42070	-	5:16818984-16820195	16818984	16820195	1212	705	-1.67769	1.77305e-17	8.30677e-17
AT1G23100	AT1G23100	-	1:8195776-8196475	8195776	8196475	700	524	-1.67673	6.89858e-34	7.65218e-33
AT1G34010	AT1G34010	-	1:12359536-12361189	12359536	12361189	1654	995	-1.67614	1.29223e-17	6.09802e-17
AT4G24370	AT4G24370	-	4:12611396-12612131	12611396	12612131	736	736	-1.67563	4.24025e-10	1.20833e-09
AT5G08280	HEMC	-	5:2663499-2665792	2663499	2665792	2294	1609	-1.67428	1.24767e-35	1.50208e-34
AT2G38310	PYL4	-	2:16050063-16051168	16050063	16051168	1106	1106	-1.67423	4.14185e-24	2.86979e-23
AT1G59840	CCB4	-	1:22026507-22029379	22026507	22029379	2873	2094	-1.67408	1.74791e-24	1.24158e-23
AT4G09040	AT4G09040	-	4:5794529-5797375	5794529	5797375	2847	1443	-1.67366	1.48912e-48	3.05162e-47
AT4G08290	AT4G08290	-	4:5238906-5241034	5238906	5241034	2129	1667	-1.67312	1.36287e-37	1.78555e-36
AT3G13690	AT3G13690	-	3:4485735-4490231	4485735	4490231	4497	3321	-1.6723	7.81836e-42	1.22652e-40
AT2G20450	AT2G20450	-	2:8813862-8815253	8813862	8815253	1392	648	-1.6723	1.27469e-35	1.53353e-34
AT2G16370	THY-1	-	2:7081783-7084557	7081783	7084557	2775	1924	-1.67158	2.1338e-22	1.34071e-21
AT4G23740	AT4G23740	-	4:12366386-12369338	12366386	12369338	2953	2390	-1.67092	3.60074e-40	5.28618e-39
AT5G62998	AT5G62998	-	5:25279882-25279995	25279882	25279995	114	114	-1.67089	0.000758884	0.00123873
AT2G25870	AT2G25870	-	2:11031115-11034454	11031115	11034454	3340	1951	-1.66989	3.40283e-48	6.84082e-47
AT1G11130	SRF9	-	1:3722857-3727450	3722857	3727450	4594	2857	-1.66941	1.57839e-18	7.86266e-18
AT2G19800	MIOX2	-	2:8530896-8533508	8530896	8533508	2613	1318	-1.66922	4.93945e-47	9.57732e-46
AT1G47750	PEX11A	-	1:17569256-17570159	17569256	17570159	904	904	-1.66839	4.80446e-37	6.14238e-36
AT4G20420	AT4G20420	-	4:11016970-11017623	11016970	11017623	654	654	-1.66829	4.65561e-05	8.62676e-05
AT3G61580	AT3G61580	-	3:22786047-22787972	22786047	22787972	1926	1926	-1.66759	3.12089e-42	4.94638e-41
AT3G23160	AT3G23160	-	3:8259855-8262028	8259855	8262028	2174	2174	-1.66745	3.06126e-25	2.25984e-24
AT4G39840	AT4G39840	-	4:18484901-18486814	18484901	18486814	1914	1914	-1.66686	1.59406e-42	2.55517e-41
AT1G05570	ATGSL06	-	1:1647706-1659437	1647706	1659437	11732	6231	-1.66677	1.45816e-29	1.3199e-28
AT5G66567	AT5G66567	-	5:26567660-26567731	26567660	26567731	72	72	-1.66554	1.28752e-05	2.51487e-05
AT1G18540	AT1G18540	-	1:6377321-6378580	6377321	6378580	1260	861	-1.66384	1.19832e-34	1.37333e-33
AT5G23860	TUB8	-	5:8042876-8044819	8042876	8044819	1944	1727	-1.66262	5.44577e-35	6.37046e-34
AT5G62500	ATEB1B	-	5:25092641-25095244	25092641	25095244	2604	1408	-1.66232	2.23209e-15	9.21753e-15
AT1G58983	AT1G58983	-	1:21806020-21807487	21806020	21807487	1468	1126	-1.66194	1.04266e-29	9.51901e-29
AT5G57123	AT5G57123	-	5:23126922-23127654	23126922	23127654	733	733	-1.66174	1.0536e-37	1.3868e-36
AT5G42100	BG_PPAP	-	5:16829151-16831239	16829151	16831239	2089	1782	-1.66145	2.63734e-40	3.89209e-39
AT3G22790	AT3G22790	-	3:8052318-8058764	8052318	8058764	6447	5537	-1.66069	2.372e-27	1.93033e-26
AT5G65860	AT5G65860	-	5:26347593-26349056	26347593	26349056	1464	1463	-1.66048	5.33869e-55	1.37129e-53
AT1G32200	ACT1	-	1:11601781-11605060	11601781	11605060	3280	1881	-1.66048	1.10801e-38	1.52235e-37
AT4G18760	AtRLP51	-	4:10308163-10309458	10308163	10309458	1296	1296	-1.65973	5.69357e-13	1.99163e-12
AT1G69030	AT1G69030	-	1:25947265-25949262	25947265	25949262	1998	1118	-1.65959	1.43856e-13	5.25589e-13
AT4G13930	SHM4	-	4:8047692-8050106	8047692	8050106	2415	1822	-1.65877	1.54973e-37	2.0241e-36
AT1G21880	LYM1	-	1:7680481-7682641	7680481	7682641	2161	1714	-1.65849	4.29309e-50	9.25721e-49
AT4G35460	ATNTRB	-	4:16842188-16844082	16842188	16844082	1895	1500	-1.65845	4.5852e-31	4.48116e-30
AT1G26880	AT1G26880	-	1:9315383-9316729	9315383	9316729	1347	754	-1.6583	3.41698e-31	3.36275e-30
AT1G18480	AT1G18480	-	1:6361629-6363007	6361629	6363007	1379	1379	-1.65787	3.95471e-50	8.53844e-49
AT1G53240	mMDH1	-	1:19854615-19856937	19854615	19856937	2323	1512	-1.65778	2.41987e-36	2.98987e-35
AT3G51670	AT3G51670	-	3:19168850-19171150	19168850	19171150	2301	1594	-1.6576	1.473e-37	1.92686e-36
AT3G13400	sks13	-	3:4355138-4357428	4355138	4357428	2291	1898	-1.65591	1.64343e-08	4.12308e-08
AT5G18920	AT5G18920	-	5:6310064-6310846	6310064	6310846	783	488	-1.6551	6.24644e-27	4.9945e-26
AT3G14415	AT3G14415	-	3:4818298-4821006	4818298	4821006	2709	1675	-1.65367	8.86622e-35	1.02653e-33
AT5G07580	AT5G07580	-	5:2399504-2400601	2399504	2400601	1098	1098	-1.65199	1.97867e-09	5.33411e-09
AT5G19750	AT5G19750	-	5:6677069-6679384	6677069	6679384	2316	1179	-1.64827	1.48024e-43	2.47345e-42
AT5G39210	CRR7	-	5:15703121-15704104	15703121	15704104	984	686	-1.64785	2.52495e-18	1.23992e-17
AT1G07890	APX1	-	1:2437330-2439665	2437330	2439665	2336	1578	-1.64777	5.07424e-45	8.97509e-44
AT1G77750	AT1G77750	-	1:29230154-29231524	29230154	29231524	1371	691	-1.64735	5.66996e-32	5.81316e-31
AT5G03370	AT5G03370	-	5:825573-827043	825573	827043	1471	764	-1.64661	2.64697e-20	1.48215e-19
AT2G32280	AT2G32280	-	2:13713036-13714211	13713036	13714211	1176	900	-1.64626	1.11746e-07	2.62784e-07
AT1G10000	AT1G10000	-	1:3263877-3264788	3263877	3264788	912	912	-1.64373	4.47784e-18	2.16933e-17
AT5G43745	AT5G43745	-	5:17569147-17574971	17569147	17574971	5825	2759	-1.64281	2.59632e-38	3.51021e-37
AT1G06870	AT1G06870	-	1:2108593-2110986	2108593	2110986	2394	1687	-1.64161	2.70909e-16	1.18005e-15
AT5G41080	AT5G41080	-	5:16441744-16443985	16441744	16443985	2242	1472	-1.64054	1.92001e-22	1.20773e-21
AT3G15110	AT3G15110	-	3:5084278-5085843	5084278	5085843	1566	937	-1.64032	3.49102e-29	3.11998e-28
AT1G10750	AT1G10750	-	1:3574807-3578474	3574807	3578474	3668	1747	-1.6401	9.50529e-17	4.25876e-16
AT1G23330	AT1G23330	-	1:8279588-8281891	8279588	8281891	2304	1702	-1.6387	2.94014e-11	9.11663e-11
AT3G46320	AT3G46320	-	3:17019911-17020428	17019911	17020428	518	518	-1.63836	1.5743e-25	1.17808e-24
AT3G62530	AT3G62530	-	3:23132138-23133298	23132138	23133298	1161	924	-1.63799	2.97467e-30	2.79114e-29
AT3G51870	AT3G51870	-	3:19243950-19246936	19243950	19246936	2987	1499	-1.63746	6.97692e-51	1.55188e-49
AT5G61170	AT5G61170	-	5:24611086-24612427	24611086	24612427	1342	729	-1.63681	9.18869e-29	8.02979e-28
AT1G23000	AT1G23000	-	1:8143404-8145070	8143404	8145070	1667	1492	-1.63672	1.13929e-43	1.91507e-42
AT5G50660	AT5G50660	-	5:20612575-20612778	20612575	20612778	204	204	-1.63661	0.000176479	0.000308084
AT2G29570	PCNA2	-	2:12649906-12651703	12649906	12651703	1798	1133	-1.63652	5.56666e-35	6.50288e-34
AT4G13100	AT4G13100	-	4:7636438-7639037	7636438	7639037	2600	1247	-1.63584	3.3832e-24	2.36349e-23
AT1G77940	AT1G77940	-	1:29303897-29305382	29303897	29305382	1486	652	-1.63442	2.57979e-30	2.43006e-29
AT1G19180	JAZ1	-	1:6622094-6623620	6622094	6623620	1527	1527	-1.63433	9.81376e-23	6.28995e-22
AT3G16100	ATRAB7D	-	3:5459172-5460790	5459172	5460790	1619	953	-1.63402	7.70294e-17	3.46592e-16
AT5G27490	AT5G27490	-	5:9702835-9704719	9702835	9704719	1885	1210	-1.63385	1.42791e-11	4.52288e-11
AT1G71860	ATPTP1	-	1:27026711-27029092	27026711	27029092	2382	1510	-1.63378	1.02528e-47	2.02745e-46
AT1G70550	AT1G70550	-	1:26597152-26600219	26597152	26600219	3068	1964	-1.63271	1.16062e-07	2.72668e-07
AT4G18750	DOT4	-	4:10304850-10307570	10304850	10307570	2721	2721	-1.63158	2.01083e-14	7.77285e-14
AT1G27460	NPGR1	-	1:9534532-9537561	9534532	9537561	3030	2519	-1.63136	1.72043e-40	2.55678e-39
AT3G09580	AT3G09580	-	3:2942504-2944078	2942504	2944078	1575	1575	-1.63083	1.6579e-17	7.78237e-17
AT5G59020	AT5G59020	-	5:23826975-23830437	23826975	23830437	3463	2691	-1.63035	3.09829e-11	9.59473e-11
AT5G60800	AT5G60800	-	5:24460783-24462541	24460783	24462541	1759	1258	-1.62933	2.2035e-06	4.61502e-06
AT5G07000	ATST2B	-	5:2171403-2172939	2171403	2172939	1537	1537	-1.62926	1.29177e-33	1.41343e-32
AT2G35382	AT2G35382	-	2:14894380-14894455	14894380	14894455	76	76	-1.62832	0.000109559	0.000195623
AT3G02790	AT3G02790	-	3:604845-605421	604845	605421	577	577	-1.62783	5.83623e-23	3.79669e-22
AT5G67220	AT5G67220	-	5:26820121-26821964	26820121	26821964	1844	1465	-1.6276	1.81365e-42	2.8962e-41
AT2G23790	AT2G23790	-	2:10125368-10127521	10125368	10127521	2154	1401	-1.62757	1.86484e-40	2.76569e-39
AT5G23760	AT5G23760	-	5:8013085-8014228	8013085	8014228	1144	568	-1.62684	7.20553e-19	3.67042e-18
AT1G29910	CAB3	-	1:10472280-10473299	10472280	10473299	1020	1020	-1.62628	1.8988e-06	4.00462e-06
AT2G39080	AT2G39080	-	2:16309798-16312541	16309798	16312541	2744	1305	-1.626	1.1325e-25	8.55413e-25
AT5G57440	GPP2	-	5:23271127-23272929	23271127	23272929	1803	1143	-1.62576	3.69597e-24	2.57349e-23
AT5G57560	TCH4	-	5:23307130-23308282	23307130	23308282	1153	1068	-1.62567	1.87043e-22	1.17698e-21
AT5G64330	NPH3	-	5:25727337-25730361	25727337	25730361	3025	2688	-1.62487	1.0348e-09	2.85789e-09
AT4G28040	AT4G28040	-	4:13940346-13942436	13940346	13942436	2091	1758	-1.62439	1.8851e-06	3.97671e-06
AT4G34980	SLP2	-	4:16656691-16659339	16656691	16659339	2649	2649	-1.6241	2.33778e-31	2.32091e-30
AT1G05590	HEXO2	-	1:1669350-1671876	1669350	1671876	2527	2131	-1.62265	8.31854e-15	3.30535e-14
AT5G61440	ACHT5	-	5:24707500-24708893	24707500	24708893	1394	1105	-1.62225	6.05202e-15	2.42583e-14
AT2G18040	PIN1AT	-	2:7842164-7843870	7842164	7843870	1707	875	-1.62219	1.16127e-33	1.27311e-32
AT1G15690	AVP1	-	1:5398990-5402733	5398990	5402733	3744	2986	-1.62176	2.20371e-36	2.72677e-35
AT3G15990	SULTR3;4	-	3:5426987-5430880	5426987	5430880	3894	2257	-1.62145	1.96895e-08	4.91351e-08
AT4G37430	CYP81F1	-	4:17597110-17598958	17597110	17598958	1849	1764	-1.62039	4.44949e-34	4.98125e-33
AT5G46720	AT5G46720	-	5:18959169-18959749	18959169	18959749	581	581	-1.61973	1.04782e-06	2.26145e-06
AT5G39610	ATNAC6	-	5:15858400-15859788	15858400	15859788	1389	1187	-1.61971	2.36001e-11	7.36229e-11
AT3G47650	AT3G47650	-	3:17569505-17570567	17569505	17570567	1063	787	-1.61864	8.66696e-41	1.29943e-39
AT2G43110	AT2G43110	-	2:17922060-17924355	17922060	17924355	2296	938	-1.61796	1.34022e-27	1.11096e-26
AT5G63150	AT5G63150	-	5:25330189-25330844	25330189	25330844	656	656	-1.61779	2.93229e-46	5.45437e-45
AT2G05620	PGR5	-	2:2081009-2081858	2081009	2081858	850	768	-1.61764	1.03728e-26	8.21619e-26
AT5G15640	AT5G15640	-	5:5087371-5090040	5087371	5090040	2670	1554	-1.6175	3.35806e-28	2.86357e-27
AT4G33160	AT4G33160	-	4:15994089-15995655	15994089	15995655	1567	1567	-1.61694	6.1022e-12	1.98295e-11
AT1G27970	NTF2B	-	1:9746811-9748467	9746811	9748467	1657	951	-1.61688	8.25846e-49	1.71312e-47
AT1G70185	AT1G70185	-	1:26429733-26430069	26429733	26430069	337	337	-1.6165	0.000427449	0.000715811
AT4G01130	AT4G01130	-	4:485833-488007	485833	488007	2175	1184	-1.61631	1.22893e-08	3.11501e-08
AT3G27890	NQR	-	3:10350656-10352033	10350656	10352033	1378	837	-1.61617	1.02542e-23	6.95128e-23
AT1G57860	AT1G57860	-	1:21429898-21430865	21429898	21430865	968	669	-1.61583	1.68156e-30	1.59999e-29
AT5G63820	AT5G63820	-	5:25541576-25542893	25541576	25542893	1318	678	-1.6153	1.77797e-09	4.81453e-09
AT3G27830	RPL12-A	-	3:10318505-10319432	10318505	10319432	928	928	-1.61487	1.20606e-26	9.52192e-26
AT5G07860	AT5G07860	-	5:2511442-2513095	2511442	2513095	1654	1491	-1.61464	1.19381e-07	2.80118e-07
AT2G28900	OEP16	-	2:12414114-12415578	12414114	12415578	1465	875	-1.61441	7.38252e-29	6.48489e-28
AT4G34730	AT4G34730	-	4:16569396-16573680	16569396	16573680	4285	1540	-1.61388	2.0789e-42	3.31351e-41
AT5G52547	AT5G52547	-	5:21326119-21327471	21326119	21327471	1353	724	-1.61371	3.32509e-07	7.50251e-07
AT2G39350	AT2G39350	-	2:16430085-16432557	16430085	16432557	2473	2473	-1.61321	8.50517e-07	1.85071e-06
AT5G36700	ATPGLP1	-	5:14421576-14424511	14421576	14424511	2936	1624	-1.60963	1.51888e-07	3.52917e-07
AT3G56810	AT3G56810	-	3:21036760-21038947	21036760	21038947	2188	1186	-1.60953	1.25925e-09	3.45187e-09
AT3G01680	AT3G01680	-	3:251981-255513	251981	255513	3533	2542	-1.60814	6.16491e-15	2.46815e-14
AT2G23380	CLF	-	2:9955553-9960359	9955553	9960359	4807	2968	-1.60811	3.68349e-35	4.35713e-34
AT3G07330	CSLC06	-	3:2335612-2339100	2335612	2339100	3489	2716	-1.6068	3.68424e-43	6.02542e-42
AT2G42570	TBL39	-	2:17717367-17720080	17717367	17720080	2714	1394	-1.60605	1.96625e-23	1.3088e-22
AT5G62680	AT5G62680	-	5:25165137-25167943	25165137	25167943	2807	2265	-1.6058	4.6929e-31	4.58112e-30
AT5G13820	HPPBF-1	-	5:4460894-4464666	4460894	4464666	3773	2548	-1.60541	2.78664e-12	9.27255e-12
AT4G13494	MIR863A	AT4G13495	4:7846597-7846899	7846597	7846899	303	303	-1.60504	9.30045e-08	2.19872e-07
AT1G59359	AT1G59359	-	1:21842304-21843745	21842304	21843745	1442	1100	-1.60484	2.15564e-33	2.34051e-32
AT1G18265	AT1G18265	-	1:6282252-6283293	6282252	6283293	1042	1042	-1.60464	9.56708e-07	2.07034e-06
AT3G62400	AT3G62400	-	3:23089641-23090737	23089641	23090737	1097	591	-1.60434	1.03918e-29	9.49283e-29
AT2G27385	AT2G27385	-	2:11716001-11717432	11716001	11717432	1432	1151	-1.60411	2.11572e-13	7.62298e-13
AT4G22910	FZR2	-	4:12012677-12016011	12012677	12016011	3335	1866	-1.60395	1.01234e-11	3.24053e-11
AT3G51080	GATA6	-	3:18973213-18974892	18973213	18974892	1680	1297	-1.60171	1.82278e-10	5.34364e-10
AT1G08580	AT1G08580	-	1:2715079-2716404	2715079	2716404	1326	642	-1.60143	7.96242e-31	7.67539e-30
AT2G04050	AT2G04050	-	2:1337386-1339270	1337386	1339270	1885	1431	-1.60028	9.97285e-16	4.20345e-15
AT5G41060	AT5G41060	-	5:16435322-16437699	16435322	16437699	2378	1711	-1.59997	2.72538e-14	1.04372e-13
AT3G09810	IDH-VI	-	3:3008694-3011437	3008694	3011437	2744	1551	-1.5979	6.20303e-33	6.58712e-32
AT4G37432	AT4G37432	-	4:17597179-17598690	17597179	17598690	1512	1101	-1.59782	5.80644e-28	4.8947e-27
AT2G38700	MVD1	-	2:16180696-16183946	16180696	16183946	3251	1622	-1.59762	1.71874e-24	1.2224e-23
AT1G65541	AT1G65541	-	1:24366310-24366405	24366310	24366405	96	96	-1.59645	0.0324913	0.0434664
AT5G43170	AZF3	-	5:17330945-17331646	17330945	17331646	702	702	-1.59507	1.60675e-11	5.06377e-11
AT3G47342	AT3G47342	-	3:17445382-17445459	17445382	17445459	78	78	-1.59463	1.93834e-07	4.46276e-07
AT1G18040	CDKD1;3	-	1:6206871-6209500	6206871	6209500	2630	1634	-1.59438	2.64212e-09	7.03636e-09
AT3G26170	CYP71B19	-	3:9573360-9575148	9573360	9575148	1789	1710	-1.59438	1.5725e-08	3.94979e-08
AT2G40400	AT2G40400	-	2:16869334-16873258	16869334	16873258	3925	2696	-1.5943	2.40945e-16	1.05278e-15
AT1G55210	AT1G55210	-	1:20597790-20598708	20597790	20598708	919	919	-1.59425	4.84581e-13	1.70282e-12
AT1G48610	AT1G48610	-	1:17970678-17973303	17970678	17973303	2626	1469	-1.59409	2.19391e-40	3.24902e-39
AT1G57610	AT1G57610	-	1:21337209-21338756	21337209	21338756	1548	1466	-1.5936	7.19835e-31	6.95074e-30
AT1G68650	AT1G68650	-	1:25775741-25777874	25775741	25777874	2134	962	-1.59328	0.000176358	0.000307944
AT3G10260	AT3G10260	-	3:3171222-3172966	3171222	3172966	1745	1393	-1.59286	2.60661e-21	1.54435e-20
AT3G29034	AT3G29034	-	3:11030064-11030633	11030064	11030633	570	570	-1.59263	0.000141806	0.000249864
AT4G36930	SPT	-	4:17414127-17416294	17414127	17416294	2168	1511	-1.59183	3.24143e-30	3.03472e-29
AT1G19720	AT1G19720	-	1:6819564-6822711	6819564	6822711	3148	3069	-1.59168	3.61475e-10	1.03619e-09
AT5G56310	AT5G56310	-	5:22802316-22804377	22802316	22804377	2062	2062	-1.59136	6.5484e-11	1.9822e-10
AT2G17420	NTRA	-	2:7564345-7566539	7564345	7566539	2195	1469	-1.59108	5.33149e-47	1.03139e-45
AT4G30850	HHP2	-	4:15020182-15022445	15020182	15022445	2264	1545	-1.587	1.05609e-19	5.68046e-19
AT5G63810	BGAL10	-	5:25537074-25541529	25537074	25541529	4456	2608	-1.5858	1.67367e-28	1.44986e-27
AT3G17840	RLK902	-	3:6106028-6108675	6106028	6108675	2648	2253	-1.58563	1.53123e-37	2.00148e-36
AT5G07870	AT5G07870	-	5:2513794-2515418	2513794	2515418	1625	1532	-1.5855	2.96065e-30	2.77953e-29
AT5G55510	AT5G55510	-	5:22486426-22488015	22486426	22488015	1590	843	-1.5845	5.66339e-29	5.00335e-28
AT2G18970	AT2G18970	-	2:8229116-8229755	8229116	8229755	640	531	-1.58374	0.000152188	0.000267284
AT3G25290	AT3G25290	-	3:9208937-9210599	9208937	9210599	1663	1446	-1.58089	6.80951e-07	1.49403e-06
AT5G41460	AT5G41460	-	5:16589598-16592241	16589598	16592241	2644	1745	-1.58034	4.8336e-30	4.48074e-29
AT1G44100	AAP5	-	1:16764405-16767685	16764405	16767685	3281	2151	-1.57964	1.61564e-43	2.69703e-42
AT2G23300	AT2G23300	-	2:9914608-9917130	9914608	9917130	2523	2322	-1.57916	1.19347e-14	4.68503e-14
AT5G64640	AT5G64640	-	5:25836727-25839199	25836727	25839199	2473	2048	-1.57904	1.45959e-12	4.95121e-12
AT1G04635	EMB1687	-	1:1291314-1291995	1291314	1291995	682	682	-1.57888	1.93299e-15	8.02151e-15
AT2G39700	ATHEXP.ALPHA.1.6	-	2:16543832-16545584	16543832	16545584	1753	1338	-1.57878	1.28922e-16	5.73376e-16
AT3G15520	AT3G15520	-	3:5249599-5252506	5249599	5252506	2908	1615	-1.57802	4.65492e-26	3.58969e-25
AT5G49100	AT5G49100	-	5:19897370-19899114	19897370	19899114	1745	1745	-1.57773	2.08479e-27	1.70397e-26
AT3G19360	AT3G19360	-	3:6707241-6709028	6707241	6709028	1788	1383	-1.5772	6.45057e-32	6.59751e-31
AT1G67510	AT1G67510	-	1:25297477-25300184	25297477	25300184	2708	2160	-1.57688	9.89524e-10	2.73777e-09
AT4G17720	AT4G17720	-	4:9862446-9864663	9862446	9864663	2218	1321	-1.57666	8.57992e-32	8.7279e-31
AT4G12830	AT4G12830	-	4:7531141-7533587	7531141	7533587	2447	1490	-1.57634	1.38877e-09	3.79156e-09
AT3G54470	AT3G54470	-	3:20168095-20170303	20168095	20170303	2209	1679	-1.57593	3.87026e-28	3.2904e-27
AT2G38650	GAUT7	-	2:16161488-16165796	16161488	16165796	4309	2438	-1.57576	2.99924e-43	4.92895e-42
AT1G26920	AT1G26920	-	1:9329512-9330398	9329512	9330398	887	887	-1.5755	7.93768e-11	2.38949e-10
AT2G36880	MAT3	-	2:15479366-15481412	15479366	15481412	2047	1754	-1.57502	3.41574e-39	4.81819e-38
AT2G24310	AT2G24310	-	2:10344358-10345510	10344358	10345510	1153	1153	-1.57489	5.7717e-07	1.27459e-06
AT4G22780	ACR7	-	4:11968276-11971149	11968276	11971149	2874	1963	-1.5743	4.49045e-16	1.93508e-15
AT1G62050	AT1G62050	-	1:22936127-22939024	22936127	22939024	2898	2221	-1.57386	4.00684e-10	1.14393e-09
AT1G80720	AT1G80720	-	1:30336138-30337565	30336138	30337565	1428	942	-1.57336	2.30646e-30	2.18109e-29
AT3G50110	PEN3	-	3:18580609-18584535	18580609	18584535	3927	2251	-1.57322	2.05502e-09	5.52938e-09
AT1G73120	AT1G73120	-	1:27497186-27497950	27497186	27497950	765	574	-1.5727	1.19107e-17	5.63478e-17
AT2G15280	AT2G15280	-	2:6640154-6642350	6640154	6642350	2197	1018	-1.57173	8.2253e-19	4.1673e-18
AT1G75710	AT1G75710	-	1:28428706-28431249	28428706	28431249	2544	1610	-1.57162	7.41125e-16	3.1449e-15
AT4G28050	TET7	-	4:13942257-13943732	13942257	13943732	1476	1212	-1.57146	1.18284e-24	8.48749e-24
AT4G34840	ATMTAN2	-	4:16606274-16608024	16606274	16608024	1751	1066	-1.57117	5.34904e-16	2.29398e-15
AT3G16000	MFP1	-	3:5430889-5433817	5430889	5433817	2929	2537	-1.57043	1.67055e-29	1.50973e-28
AT1G64450	AT1G64450	-	1:23941598-23942846	23941598	23942846	1249	1249	-1.57035	2.01076e-19	1.06396e-18
AT2G36170	AT2G36170	-	2:15172094-15173280	15172094	15173280	1187	680	-1.56958	2.16901e-31	2.1597e-30
AT3G11710	ATKRS-1	-	3:3702169-3705714	3702169	3705714	3546	2172	-1.56889	1.29363e-25	9.75383e-25
AT3G50520	AT3G50520	-	3:18748023-18749593	18748023	18749593	1571	903	-1.5688	1.44379e-22	9.15322e-22
AT3G48420	AT3G48420	-	3:17929647-17931701	17929647	17931701	2055	1206	-1.5674	1.46828e-14	5.73721e-14
AT4G08520	AT4G08520	-	4:5417348-5420530	5417348	5420530	3183	843	-1.56716	1.86591e-40	2.76569e-39
AT4G14455	BS14B	-	4:8310336-8312321	8310336	8312321	1986	922	-1.56711	1.26867e-32	1.33054e-31
AT3G58100	PDCB5	-	3:21515199-21516487	21515199	21516487	1289	899	-1.56706	0.000162513	0.000284768
AT3G22230	AT3G22230	-	3:7843967-7844597	7843967	7844597	631	631	-1.56614	4.14998e-29	3.69137e-28
AT4G21140	AT4G21140	-	4:11277491-11278222	11277491	11278222	732	732	-1.56597	7.09291e-30	6.52864e-29
AT5G04790	AT5G04790	-	5:1388155-1388319	1388155	1388319	165	165	-1.56587	2.563e-05	4.87953e-05
AT2G23130	AGP17	-	2:9844299-9845385	9844299	9845385	1087	1074	-1.56501	4.81515e-08	1.16404e-07
AT5G18690	ATAGP25	-	5:6233519-6234206	6233519	6234206	688	688	-1.56479	4.52219e-05	8.38965e-05
AT2G20722	AT2G20722	-	2:8931708-8931782	8931708	8931782	75	75	-1.56425	1.36825e-06	2.92244e-06
AT5G16560	KAN	-	5:5406863-5411424	5406863	5411424	4562	2046	-1.56406	2.63348e-20	1.47508e-19
AT3G55720	AT3G55720	-	3:20679820-20681447	20679820	20681447	1628	1499	-1.56148	7.16474e-10	2.00459e-09
AT3G43810	CAM7	-	3:15664371-15666460	15664371	15666460	2090	803	-1.56013	3.98462e-33	4.27696e-32
AT3G48960	AT3G48960	-	3:18150444-18151412	18150444	18151412	969	621	-1.55967	0.0271955	0.0367565
AT4G18390	TCP2	-	4:10162953-10165562	10162953	10165562	2610	1845	-1.55876	8.15783e-34	8.99594e-33
AT5G57970	AT5G57970	-	5:23466718-23469015	23466718	23469015	2298	1610	-1.55872	3.69592e-19	1.92493e-18
AT1G77630	AT1G77630	-	1:29173457-29175530	29173457	29175530	2074	1684	-1.55738	5.09117e-23	3.32221e-22
AT5G54100	AT5G54100	-	5:21953787-21956564	21953787	21956564	2778	1518	-1.55679	4.04032e-28	3.42981e-27
AT5G56530	AT5G56530	-	5:22889132-22891853	22889132	22891853	2722	1927	-1.55477	4.76276e-43	7.75185e-42
AT5G08260	scpl35	-	5:2657151-2661416	2657151	2661416	4266	1672	-1.55394	8.74704e-27	6.95123e-26
AT4G31700	RPS6	-	4:15346072-15347727	15346072	15347727	1656	1010	-1.55376	2.25091e-34	2.55198e-33
AT4G39990	ATRAB11G	-	4:18542551-18543978	18542551	18543978	1428	1045	-1.55364	5.4296e-36	6.62631e-35
AT2G46950	CYP709B2	-	2:19289138-19291614	19289138	19291614	2477	2120	-1.55199	1.99046e-24	1.41032e-23
AT5G63140	ATPAP29	-	5:25328119-25329799	25328119	25329799	1681	1471	-1.55059	2.2472e-22	1.41084e-21
AT2G47930	AGP26	-	2:19616975-19617681	19616975	19617681	707	707	-1.55018	3.98698e-18	1.93763e-17
AT4G33680	AGD2	-	4:16171694-16174686	16171694	16174686	2993	1595	-1.54991	1.36404e-30	1.30299e-29
AT3G60380	AT3G60380	-	3:22316913-22319266	22316913	22319266	2354	2354	-1.54885	6.23343e-35	7.26176e-34
AT3G56270	AT3G56270	-	3:20870000-20872049	20870000	20872049	2050	1756	-1.54812	1.01871e-11	3.26028e-11
AT1G78040	AT1G78040	-	1:29345838-29347107	29345838	29347107	1270	938	-1.54777	2.30453e-33	2.49736e-32
AT5G46730	AT5G46730	-	5:18964012-18965068	18964012	18965068	1057	1057	-1.54729	9.56641e-06	1.89193e-05
AT1G05230	HDG2	-	1:1512896-1518805	1512896	1518805	5910	2993	-1.5471	2.06961e-23	1.37598e-22
AT1G36310	AT1G36310	-	1:13669441-13671156	13669441	13671156	1716	1640	-1.54623	3.69897e-43	6.04368e-42
AT3G55340	PHIP1	-	3:20515647-20518059	20515647	20518059	2413	2046	-1.5455	1.09572e-38	1.50668e-37
AT1G69850	ATNRT1:2	-	1:26296676-26300472	26296676	26300472	3797	2092	-1.54477	8.90254e-34	9.79163e-33
AT3G14840	AT3G14840	-	3:4988107-4994058	4988107	4994058	5952	3504	-1.5447	3.84643e-39	5.40768e-38
AT1G30630	AT1G30630	-	1:10858298-10860261	10858298	10860261	1964	1215	-1.54322	7.39206e-34	8.18347e-33
AT5G57700	AT5G57700	-	5:23374874-23377142	23374874	23377142	2269	1404	-1.54221	1.20928e-09	3.31919e-09
AT3G11170	FAD7	-	3:3499801-3502452	3499801	3502452	2652	1825	-1.54185	5.89148e-35	6.87285e-34
AT4G36945	AT4G36945	-	4:17419918-17422130	17419918	17422130	2213	1490	-1.5413	1.80767e-19	9.60702e-19
AT5G05820	AT5G05820	-	5:1751688-1754178	1751688	1754178	2491	1669	-1.54097	1.03919e-23	7.0418e-23
AT4G34120	CDCP1	-	4:16341009-16343118	16341009	16343118	2110	1127	-1.54072	2.14127e-45	3.84769e-44
AT5G66550	AT5G66550	-	5:26559584-26561216	26559584	26561216	1633	846	-1.54055	8.65278e-22	5.24215e-21
AT1G78610	MSL6	-	1:29569030-29572126	29569030	29572126	3097	2767	-1.53956	5.57588e-25	4.07525e-24
AT3G05560	AT3G05560	-	3:1614178-1615506	1614178	1615506	1329	1006	-1.53915	3.08036e-29	2.76172e-28
AT3G53670	AT3G53670	AT3G53668	3:19890364-19892443	19890364	19892443	2080	1494	-1.53899	2.99193e-31	2.95475e-30
AT3G53668	CPuORF51	AT3G53670	3:19890421-19892404	19890421	19892404	1984	1398	-1.53899	2.99638e-31	2.95741e-30
AT1G71015	AT1G71015	-	1:26789236-26790160	26789236	26790160	925	840	-1.53723	3.23957e-11	1.00194e-10
AT2G39675	TAS1C	-	2:16537288-16538277	16537288	16538277	990	990	-1.53721	1.08932e-19	5.85551e-19
AT3G23700	AT3G23700	-	3:8531429-8533788	8531429	8533788	2360	1485	-1.53492	1.79029e-43	2.97685e-42
AT1G57820	VIM1	-	1:21414170-21417946	21414170	21417946	3777	2154	-1.5312	4.39687e-19	2.27532e-18
AT1G13210	ACA.l	-	1:4508963-4513938	4508963	4513938	4976	4065	-1.53016	3.43443e-25	2.52979e-24
AT2G34510	AT2G34510	-	2:14543997-14546879	14543997	14546879	2883	1470	-1.53011	3.28239e-13	1.16578e-12
AT5G01890	AT5G01890	-	5:341543-345127	341543	345127	3585	3499	-1.52955	5.13979e-19	2.64925e-18
AT3G62270	AT3G62270	-	3:23042284-23046048	23042284	23046048	3765	2771	-1.52771	2.77943e-45	4.97329e-44
AT3G48490	AT3G48490	-	3:17961289-17961910	17961289	17961910	622	522	-1.52573	0.000295033	0.000502214
AT5G47360	AT5G47360	-	5:19214445-19215878	19214445	19215878	1434	1434	-1.5256	6.90547e-11	2.0873e-10
AT1G35580	CINV1	-	1:13122204-13125264	13122204	13125264	3061	2410	-1.52546	2.28916e-37	2.9738e-36
AT1G47580	AT1G47580	-	1:17485650-17486463	17485650	17486463	814	814	-1.52494	2.19841e-08	5.46359e-08
AT1G08890	AT1G08890	-	1:2848348-2852270	2848348	2852270	3923	1675	-1.52483	2.44246e-22	1.52898e-21
AT1G51355	AT1G51355	-	1:19041397-19042146	19041397	19042146	750	750	-1.52376	1.25935e-06	2.69767e-06
AT2G20570	GPRI1	-	2:8855358-8857756	8855358	8857756	2399	1673	-1.52285	5.68966e-13	1.99067e-12
AT5G01240	LAX1	-	5:97894-101835	97894	101835	3942	2099	-1.52208	1.30539e-09	3.57547e-09
AT1G08590	AT1G08590	-	1:2718778-2722221	2718778	2722221	3444	3444	-1.52166	3.28088e-37	4.23288e-36
AT1G01120	KCS1	-	1:57269-59167	57269	59167	1899	1899	-1.52142	2.28435e-06	4.77432e-06
AT3G58620	TTL4	-	3:21680326-21683135	21680326	21683135	2810	2296	-1.52054	1.16189e-09	3.19275e-09
AT2G18969	AT2G18969	-	2:8229047-8229574	8229047	8229574	528	528	-1.52046	0.000417	0.000698937
AT2G18193	AT2G18193	-	2:7917505-7919277	7917505	7919277	1773	1697	-1.52027	2.59486e-08	6.40839e-08
AT2G34680	AIR9	-	2:14616622-14629129	14616622	14629129	12508	5739	-1.51927	1.89608e-28	1.63833e-27
AT5G23530	AtCXE18	-	5:7932966-7934436	7932966	7934436	1471	1471	-1.51918	1.95846e-20	1.10576e-19
AT5G27450	MK	-	5:9690607-9693289	9690607	9693289	2683	1788	-1.51869	7.33774e-18	3.51659e-17
AT1G71696	SOL1	-	1:26966887-26970572	26966887	26970572	3686	1935	-1.51863	1.21284e-17	5.73294e-17
AT1G65310	ATXTH17	-	1:24257216-24258473	24257216	24258473	1258	1049	-1.51851	0.0189755	0.0262267
AT4G29130	ATHXK1	-	4:14352037-14355103	14352037	14355103	3067	2030	-1.51816	3.71031e-30	3.45459e-29
AT1G71020	AT1G71020	-	1:26790597-26793175	26790597	26793175	2579	2398	-1.51776	4.17082e-30	3.87484e-29
AT5G64580	AT5G64580	-	5:25817092-25821530	25817092	25821530	4439	2823	-1.51746	3.25207e-30	3.04299e-29
AT5G51840	AT5G51840	-	5:21071944-21074438	21071944	21074438	2495	1244	-1.51742	7.2385e-24	4.96057e-23
AT1G44835	AT1G44835	-	1:16939797-16942524	16939797	16942524	2728	1226	-1.51735	3.85417e-36	4.72408e-35
AT3G48425	AT3G48425	-	3:17931818-17934744	17931818	17934744	2927	1438	-1.5171	4.24467e-13	1.49811e-12
AT4G23710	VHA-G2	-	4:12350089-12351624	12350089	12351624	1536	697	-1.51705	3.3309e-34	3.74882e-33
AT3G15710	AT3G15710	-	3:5323358-5324908	5323358	5324908	1551	872	-1.5164	9.03522e-27	7.17687e-26
AT1G27210	AT1G27210	-	1:9455368-9458026	9455368	9458026	2659	2288	-1.51624	1.11237e-24	7.99534e-24
AT1G53040	AT1G53040	-	1:19764310-19767348	19764310	19767348	3039	2188	-1.51553	6.24878e-24	4.29797e-23
AT1G24100	UGT74B1	-	1:8525435-8527087	8525435	8527087	1653	1572	-1.51544	6.97006e-31	6.73414e-30
AT3G58140	AT3G58140	-	3:21529731-21532572	21529731	21532572	2842	1733	-1.51446	2.49819e-36	3.08438e-35
AT3G23290	LSH4	-	3:8326825-8328132	8326825	8328132	1308	843	-1.51422	0.000465624	0.000777511
AT4G34265	AT4G34265	-	4:16402280-16403823	16402280	16403823	1544	764	-1.51412	4.99395e-38	6.65612e-37
AT1G27700	AT1G27700	-	1:9640198-9641901	9640198	9641901	1704	1239	-1.51405	6.69753e-10	1.88133e-09
AT2G44670	AT2G44670	-	2:18425180-18426060	18425180	18426060	881	768	-1.51365	3.14768e-22	1.95311e-21
AT5G59350	AT5G59350	-	5:23940782-23942213	23940782	23942213	1432	1432	-1.5136	3.90972e-10	1.11734e-09
AT4G30340	ATDGK7	-	4:14838291-14841067	14838291	14841067	2777	1779	-1.51359	4.33136e-35	5.09853e-34
AT4G35783	RTFL6	-	4:16952406-16952800	16952406	16952800	395	395	-1.51344	0.000217415	0.000375857
AT5G45475	AT5G45475	-	5:18425837-18427016	18425837	18427016	1180	1054	-1.51293	1.12341e-20	6.42215e-20
AT5G26960	AT5G26960	-	5:9484734-9486149	9484734	9486149	1416	1416	-1.51289	3.85226e-12	1.26936e-11
AT1G22710	SUC2	-	1:8030641-8033117	8030641	8033117	2477	1956	-1.51256	7.51251e-32	7.6605e-31
AT1G80100	AHP6	-	1:30133726-30134735	30133726	30134735	1010	640	-1.51189	2.46034e-09	6.57398e-09
AT2G32220	AT2G32220	-	2:13678919-13679523	13678919	13679523	605	605	-1.51172	6.13465e-32	6.27819e-31
AT4G34160	CYCD3;1	-	4:16357639-16359555	16357639	16359555	1917	1646	-1.51123	2.40437e-12	8.04166e-12
AT4G39838	AT4G39838	-	4:18484875-18486365	18484875	18486365	1491	1491	-1.51101	3.24532e-29	2.90461e-28
AT5G03150	JKD	-	5:745644-749007	745644	749007	3364	2046	-1.5108	3.25005e-27	2.63475e-26
AT3G57490	AT3G57490	-	3:21279666-21280948	21279666	21280948	1283	1050	-1.50993	2.18033e-32	2.26281e-31
AT2G04070	AT2G04070	-	2:1353755-1355790	1353755	1355790	2036	1623	-1.50959	1.56938e-07	3.64352e-07
AT3G06130	AT3G06130	-	3:1852884-1855063	1852884	1855063	2180	1870	-1.50913	3.74126e-12	1.23399e-11
AT5G15520	AT5G15520	-	5:5037021-5038172	5037021	5038172	1152	689	-1.50906	1.70736e-36	2.12503e-35
AT5G66470	AT5G66470	-	5:26541695-26544359	26541695	26544359	2665	1632	-1.50897	1.48242e-39	2.11577e-38
AT1G34350	AT1G34350	-	1:12534426-12536095	12534426	12536095	1670	894	-1.50874	3.35275e-19	1.75215e-18
AT5G15030	AT5G15030	-	5:4866692-4869133	4866692	4869133	2442	1276	-1.50861	7.00963e-23	4.53043e-22
AT1G69330	AT1G69330	-	1:26063816-26065505	26063816	26065505	1690	1374	-1.50855	4.44866e-11	1.36245e-10
AT1G15570	CYCA2;3	-	1:5362009-5365549	5362009	5365549	3541	1886	-1.50816	4.67151e-08	1.13093e-07
AT5G48300	ADG1	-	5:19570240-19572804	19570240	19572804	2565	1896	-1.50721	1.1837e-24	8.49007e-24
AT1G60800	NIK3	-	1:22383453-22387457	22383453	22387457	4005	2573	-1.50682	2.88662e-25	2.13557e-24
AT2G05520	ATGRP-3	-	2:2026162-2027117	2026162	2027117	956	728	-1.5064	9.28176e-20	5.01476e-19
AT5G61030	GR-RBP3	-	5:24560451-24562306	24560451	24562306	1856	1147	-1.50626	1.19482e-29	1.0856e-28
AT4G20870	ATFAH2	-	4:11174450-11176881	11174450	11176881	2432	1102	-1.50601	2.42269e-14	9.30964e-14
AT3G14900	AT3G14900	-	3:5013291-5015292	5013291	5015292	2002	2002	-1.50568	6.74756e-32	6.89293e-31
AT5G01650	AT5G01650	-	5:242550-244111	242550	244111	1562	696	-1.50434	6.73904e-24	4.62203e-23
AT5G17280	AT5G17280	-	5:5686299-5686895	5686299	5686895	597	597	-1.50343	1.22057e-18	6.11077e-18
AT5G51910	AT5G51910	-	5:21094547-21095848	21094547	21095848	1302	1196	-1.50336	3.02217e-15	1.23775e-14
AT1G63610	AT1G63610	-	1:23583521-23585727	23583521	23585727	2207	1308	-1.50291	1.94913e-30	1.84834e-29
AT5G44730	AT5G44730	-	5:18045496-18046931	18045496	18046931	1436	1245	-1.50255	1.13461e-27	9.43301e-27
AT3G20015	AT3G20015	-	3:6978477-6980368	6978477	6980368	1892	1892	-1.50254	6.71186e-08	1.60355e-07
AT3G01313	AT3G01313	-	3:104687-104769	104687	104769	83	83	-1.50248	0.000121505	0.000215678
AT1G10200	WLIM1	-	1:3346390-3347885	3346390	3347885	1496	982	-1.50241	9.26845e-30	8.50337e-29
AT2G47480	AT2G47480	-	2:19483919-19484642	19483919	19484642	724	724	-1.50228	0.000792653	0.00129074
AT2G40480	AT2G40480	-	2:16910364-16912592	16910364	16912592	2229	1766	-1.50225	1.01381e-14	3.99923e-14
AT3G01600	anac044	-	3:229171-231105	229171	231105	1935	1307	-1.50221	5.10548e-07	1.13368e-06
AT1G05220	AT1G05220	-	1:1511907-1513573	1511907	1513573	1667	979	-1.49962	9.68889e-12	3.1079e-11
AT2G45790	ATPMM	-	2:18855775-18858018	18855775	18858018	2244	1107	-1.4985	2.21814e-35	2.64597e-34
AT5G11950	AT5G11950	-	5:3854916-3856983	3854916	3856983	2068	962	-1.49831	9.76004e-25	7.02715e-24
AT5G19740	AT5G19740	-	5:6673933-6676859	6673933	6676859	2927	2191	-1.49798	5.11751e-42	8.06555e-41
AT1G30820	AT1G30820	-	1:10944913-10949458	10944913	10949458	4546	2480	-1.4978	1.52021e-31	1.52625e-30
AT2G47440	AT2G47440	-	2:19469719-19471886	19469719	19471886	2168	2000	-1.49767	5.27761e-21	3.07095e-20
AT2G15820	OTP51	-	2:6888540-6891360	6888540	6891360	2821	2744	-1.4976	1.72845e-30	1.64276e-29
AT5G52010	AT5G52010	-	5:21121483-21122985	21121483	21122985	1503	1503	-1.49716	1.34221e-21	8.07666e-21
AT2G02400	AT2G02400	-	2:631236-632575	631236	632575	1340	1260	-1.49689	3.90409e-12	1.28569e-11
AT5G15320	AT5G15320	-	5:4977535-4978894	4977535	4978894	1360	510	-1.49595	2.52172e-20	1.41576e-19
AT1G05065	CLE20	-	1:1454969-1455220	1454969	1455220	252	252	-1.49569	0.000165438	0.000289563
AT1G29420	AT1G29420	-	1:10301152-10301951	10301152	10301951	800	800	-1.49553	1.07764e-13	3.97154e-13
AT5G48830	AT5G48830	-	5:19800114-19803098	19800114	19803098	2985	1932	-1.49507	4.32512e-20	2.39175e-19
AT1G25520	AT1G25520	-	1:8962125-8964564	8962125	8964564	2440	1184	-1.4947	1.46441e-31	1.4746e-30
AT1G10530	AT1G10530	-	1:3471456-3472672	3471456	3472672	1217	996	-1.49358	3.47275e-06	7.15908e-06
AT5G07460	PMSR2	-	5:2360634-2362013	2360634	2362013	1380	995	-1.49342	1.43249e-25	1.07625e-24
AT3G04760	AT3G04760	-	3:1303575-1305878	1303575	1305878	2304	2304	-1.49334	2.07965e-25	1.54803e-24
AT4G24175	AT4G24175	-	4:12546969-12548960	12546969	12548960	1992	1120	-1.49246	7.38075e-17	3.32359e-16
AT2G41170	AT2G41170	-	2:17159104-17161136	17159104	17161136	2033	1613	-1.49219	5.18057e-08	1.24934e-07
AT2G35743	AT2G35743	-	2:15027810-15027989	15027810	15027989	180	180	-1.4921	3.91756e-07	8.77383e-07
AT3G47750	ATATH3	-	3:17606427-17610889	17606427	17610889	4463	2844	-1.49185	1.7128e-07	3.96181e-07
AT4G03100	AT4G03100	-	4:1374281-1376231	1374281	1376231	1951	1691	-1.49159	1.37891e-09	3.76708e-09
AT4G33120	AT4G33120	-	4:15975386-15978111	15975386	15978111	2726	1315	-1.49139	8.26197e-05	0.000149557
AT5G34850	ATPAP26	-	5:13108154-13111631	13108154	13111631	3478	2030	-1.4906	3.21478e-43	5.27293e-42
AT4G34970	ADF9	-	4:16653704-16654871	16653704	16654871	1168	784	-1.48999	0.000329663	0.000557966
AT1G45207	AT1G45207	-	1:17130351-17133548	17130351	17133548	3198	2020	-1.48951	1.37786e-07	3.21534e-07
AT2G42395	AT2G42395	-	2:17653138-17654034	17653138	17654034	897	797	-1.48872	1.42838e-14	5.58389e-14
AT1G69200	FLN2	-	1:26015877-26018493	26015877	26018493	2617	2120	-1.48853	2.28129e-30	2.15849e-29
AT1G68585	AT1G68585	-	1:25756600-25757563	25756600	25757563	964	799	-1.48815	6.92195e-11	2.09161e-10
AT3G58940	AT3G58940	-	3:21780785-21783663	21780785	21783663	2879	2328	-1.48756	3.84582e-08	9.36799e-08
AT4G31360	AT4G31360	-	4:15221843-15223627	15221843	15223627	1785	980	-1.48748	2.41575e-18	1.18801e-17
AT3G48180	AT3G48180	-	3:17790465-17790919	17790465	17790919	455	455	-1.48746	0.000102952	0.000184409
AT5G49460	ACLB-2	-	5:20054523-20058464	20054523	20058464	3942	2336	-1.48687	2.00165e-20	1.12902e-19
AT5G04740	AT5G04740	-	5:1368542-1371480	1368542	1371480	2939	1166	-1.48617	1.06391e-39	1.53266e-38
AT5G61240	AT5G61240	-	5:24629256-24632211	24629256	24632211	2956	1502	-1.48598	4.61131e-39	6.45622e-38
AT1G01320	AT1G01320	-	1:121067-130577	121067	130577	9511	6079	-1.48576	5.05546e-26	3.88972e-25
AT2G45050	GATA2	-	2:18582872-18584083	18582872	18584083	1212	1119	-1.48564	4.52319e-06	9.20461e-06
AT4G21510	AT4G21510	-	4:11445849-11447163	11445849	11447163	1315	1160	-1.48438	4.23131e-13	1.49402e-12
AT1G22410	AT1G22410	-	1:7912046-7915003	7912046	7915003	2958	1919	-1.48425	4.77885e-29	4.2396e-28
AT3G15820	ROD1	-	3:5351071-5353728	5351071	5353728	2658	1207	-1.48354	1.20571e-08	3.05891e-08
AT3G26650	GAPA	-	3:9795071-9797045	9795071	9797045	1975	1543	-1.48184	1.12593e-15	4.72448e-15
AT3G08980	AT3G08980	-	3:2740808-2742685	2740808	2742685	1878	792	-1.48077	9.60847e-18	4.57822e-17
AT4G11680	AT4G11680	-	4:7053443-7055622	7053443	7055622	2180	1573	-1.48048	1.30338e-10	3.85704e-10
AT1G75500	WAT1	-	1:28337726-28340275	28337726	28340275	2550	1907	-1.48023	9.46038e-26	7.18098e-25
AT1G15290	AT1G15290	-	1:5257046-5264942	5257046	5264942	7897	5145	-1.47976	3.46274e-30	3.23052e-29
AT5G45580	AT5G45580	-	5:18481092-18482643	18481092	18482643	1552	840	-1.47947	0.000138335	0.00024412
AT2G23620	ATMES1	-	2:10047379-10049291	10047379	10049291	1913	918	-1.47913	1.08662e-31	1.10073e-30
AT4G10480	AT4G10480	-	4:6477876-6479165	6477876	6479165	1290	938	-1.47748	1.72689e-31	1.73067e-30
AT3G60390	HAT3	-	3:22320595-22322586	22320595	22322586	1992	1357	-1.47668	4.13275e-18	2.00674e-17
AT3G12145	FLR1	-	3:3874499-3876237	3874499	3876237	1739	1405	-1.47654	6.32026e-17	2.85669e-16
AT1G23750	AT1G23750	-	1:8400151-8401487	8400151	8401487	1337	843	-1.47544	1.77779e-12	5.99337e-12
AT1G65295	AT1G65295	-	1:24251511-24252303	24251511	24252303	793	573	-1.47505	5.39697e-17	2.44984e-16
AT5G14100	ATNAP14	-	5:4549438-4551843	4549438	4551843	2406	1316	-1.47469	9.34567e-26	7.09709e-25
AT1G29418	AT1G29418	-	1:10300878-10301302	10300878	10301302	425	425	-1.474	1.42425e-16	6.31273e-16
AT1G26260	CIB5	-	1:9086853-9089378	9086853	9089378	2526	1671	-1.47362	5.79521e-29	5.11714e-28
AT5G40645	AT5G40645	-	5:16280283-16280972	16280283	16280972	690	438	-1.47341	9.65705e-05	0.000173511
AT2G40490	HEME2	-	2:16912845-16915177	16912845	16915177	2333	1490	-1.47322	1.18222e-26	9.3424e-26
AT1G27020	AT1G27020	-	1:9378559-9380692	9378559	9380692	2134	1276	-1.4732	4.54217e-05	8.42428e-05
AT3G49720	AT3G49720	-	3:18440003-18442198	18440003	18442198	2196	1153	-1.4732	7.78232e-45	1.36935e-43
AT1G53650	CID8	-	1:20029029-20031566	20029029	20031566	2538	1501	-1.47273	4.40058e-30	4.08381e-29
AT2G10931	AT2G10931	-	2:4304947-4305887	4304947	4305887	941	941	-1.4727	2.07219e-08	5.15974e-08
AT4G25315	AT4G25315	-	4:12951344-12952870	12951344	12952870	1527	735	-1.47269	1.56588e-23	1.05014e-22
AT5G03850	AT5G03850	-	5:1028340-1029121	1028340	1029121	782	467	-1.47045	4.92548e-22	3.02407e-21
AT1G33040	NACA5	-	1:11966470-11967843	11966470	11967843	1374	854	-1.47014	1.12592e-34	1.29649e-33
AT3G49470	NACA2	-	3:18340976-18342489	18340976	18342489	1514	966	-1.46846	3.30986e-40	4.87182e-39
AT5G23950	AT5G23950	-	5:8082744-8083604	8082744	8083604	861	861	-1.4683	1.605e-05	3.10703e-05
AT2G41650	AT2G41650	-	2:17363907-17364434	17363907	17364434	528	447	-1.46814	1.92773e-27	1.58018e-26
AT5G19170	AT5G19170	-	5:6445245-6447419	6445245	6447419	2175	1290	-1.46765	1.88294e-07	4.33758e-07
AT4G22550	AT4G22550	-	4:11878137-11878920	11878137	11878920	784	784	-1.46756	2.69232e-10	7.79957e-10
AT5G24990	AT5G24990	-	5:8610537-8611694	8610537	8611694	1158	1158	-1.46735	4.43596e-35	5.21441e-34
AT1G76730	AT1G76730	-	1:28802925-28804784	28802925	28804784	1860	1254	-1.46704	1.07744e-17	5.11006e-17
AT1G51060	HTA10	-	1:18926876-18927646	18926876	18927646	771	674	-1.46701	2.07591e-38	2.82014e-37
AT3G43980	AT3G43980	-	3:15778402-15779311	15778402	15779311	910	400	-1.46678	7.41022e-24	5.07004e-23
AT1G17190	ATGSTU26	-	1:5875350-5876545	5875350	5876545	1196	935	-1.46638	1.90459e-23	1.26925e-22
AT5G43070	WPP1	-	5:17289100-17289776	17289100	17289776	677	677	-1.4655	3.5333e-10	1.01404e-09
AT1G01790	KEA1	-	1:284610-291094	284610	291094	6485	3892	-1.46498	7.89538e-15	3.1409e-14
AT5G02490	AT5G02490	-	5:550035-552647	550035	552647	2613	2305	-1.46408	2.03539e-25	1.51575e-24
AT1G14350	AtMYB124	-	1:4907953-4911168	4907953	4911168	3216	2216	-1.46406	6.14088e-13	2.1419e-12
AT3G55420	AT3G55420	-	3:20547717-20548767	20547717	20548767	1051	1051	-1.46401	2.0187e-16	8.86857e-16
AT1G53250	AT1G53250	-	1:19857351-19859256	19857351	19859256	1906	1333	-1.46387	2.138e-17	9.96917e-17
AT1G13609	AT1G13609	-	1:4662721-4663219	4662721	4663219	499	444	-1.46386	0.000192677	0.000334988
AT1G62820	AT1G62820	-	1:23263671-23264349	23263671	23264349	679	679	-1.46375	2.28934e-15	9.447e-15
AT3G20280	AT3G20280	-	3:7071193-7074641	7071193	7074641	3449	2815	-1.46354	5.43093e-15	2.18723e-14
AT3G54120	AT3G54120	-	3:20041126-20042340	20041126	20042340	1215	962	-1.46271	2.56366e-10	7.43957e-10
AT2G37250	ADK	-	2:15641906-15643786	15641906	15643786	1881	1408	-1.46258	3.68295e-34	4.13953e-33
AT3G22880	ATDMC1	-	3:8097687-8100820	8097687	8100820	3134	1376	-1.46134	8.49395e-12	2.73705e-11
AT5G51710	KEA5	-	5:21004278-21008718	21004278	21008718	4441	2133	-1.46124	5.1307e-07	1.13913e-06
AT5G02870	AT5G02870	-	5:657786-659733	657786	659733	1948	1475	-1.46079	4.09206e-27	3.2984e-26
AT4G20860	AT4G20860	-	4:11172622-11174467	11172622	11174467	1846	1846	-1.46044	3.05527e-09	8.09717e-09
AT2G35500	SKL2	-	2:14914003-14916135	14914003	14916135	2133	1425	-1.46037	8.10263e-29	7.09903e-28
AT1G80510	AT1G80510	-	1:30272849-30274793	30272849	30274793	1945	1945	-1.46027	1.19143e-07	2.79637e-07
AT5G45100	AT5G45100	-	5:18218586-18219960	18218586	18219960	1375	1375	-1.46022	1.1173e-24	8.02741e-24
AT2G26900	AT2G26900	-	2:11474952-11477944	11474952	11477944	2993	1508	-1.45898	6.34971e-35	7.38705e-34
AT1G45688	AT1G45688	-	1:17191390-17193158	17191390	17193158	1769	1553	-1.45856	2.64691e-19	1.39057e-18
AT4G17870	PYR1	-	4:9928678-9929518	9928678	9929518	841	841	-1.45849	1.80829e-21	1.07968e-20
AT5G56790	AT5G56790	-	5:22967939-22971536	22967939	22971536	3598	2826	-1.45847	3.36498e-10	9.67868e-10
AT1G54500	AT1G54500	-	1:20356954-20357788	20356954	20357788	835	835	-1.4577	3.70386e-21	2.17541e-20
AT4G28190	ULT1	-	4:13985178-13987442	13985178	13987442	2265	1774	-1.45686	3.38685e-14	1.28986e-13
AT2G47390	AT2G47390	-	2:19441992-19446365	19441992	19446365	4374	3284	-1.45618	2.70051e-32	2.7941e-31
AT5G46570	BSK2	-	5:18894402-18897406	18894402	18897406	3005	1963	-1.45443	1.46827e-15	6.13209e-15
AT5G04840	AT5G04840	-	5:1405294-1407934	1405294	1407934	2641	1431	-1.45434	1.32965e-10	3.93271e-10
AT5G42250	AT5G42250	-	5:16894009-16897620	16894009	16897620	3612	1421	-1.45385	3.17642e-38	4.27403e-37
AT2G29760	OTP81	-	2:12712884-12715852	12712884	12715852	2969	2733	-1.45289	1.09404e-19	5.87712e-19
AT3G13960	AtGRF5	-	3:4608383-4610399	4608383	4610399	2017	1576	-1.45178	4.14081e-32	4.26607e-31
AT5G64460	AT5G64460	-	5:25772849-25775568	25772849	25775568	2720	1272	-1.45164	1.0463e-19	5.6314e-19
AT3G12520	SULTR4;2	-	3:3967816-3971927	3967816	3971927	4112	2230	-1.45146	4.73152e-21	2.76079e-20
AT3G42670	CHR38	-	3:14755798-14760085	14755798	14760085	4288	3879	-1.45128	7.82524e-29	6.86666e-28
AT2G44040	AT2G44040	-	2:18221769-18224104	18221769	18224104	2336	1366	-1.45092	8.9067e-36	1.07997e-34
AT1G63650	ATMYC-2	-	1:23599413-23602902	23599413	23602902	3490	2353	-1.45053	2.1415e-28	1.8438e-27
AT4G34290	AT4G34290	-	4:16410832-16412385	16410832	16412385	1554	749	-1.45026	1.51078e-26	1.18778e-25
AT1G13970	AT1G13970	-	1:4779523-4782542	4779523	4782542	3020	2050	-1.45009	6.65175e-07	1.46056e-06
AT5G66460	MAN7	-	5:26538395-26541036	26538395	26541036	2642	2011	-1.44971	4.93597e-28	4.16922e-27
AT5G63780	SHA1	-	5:25523845-25526593	25523845	25526593	2749	1691	-1.44964	1.14637e-09	3.15216e-09
AT4G30400	AT4G30400	-	4:14866946-14868628	14866946	14868628	1683	1683	-1.44846	5.21635e-16	2.24048e-15
AT4G29350	PFN2	-	4:14450008-14451394	14450008	14451394	1387	798	-1.44844	1.89555e-24	1.34419e-23
AT3G16780	AT3G16780	-	3:5708925-5710579	5708925	5710579	1655	1017	-1.44768	7.63822e-30	7.01911e-29
AT2G21260	AT2G21260	-	2:9105583-9107380	9105583	9107380	1798	1112	-1.44577	4.05501e-09	1.06599e-08
AT1G71500	AT1G71500	-	1:26935982-26937607	26935982	26937607	1626	1242	-1.44403	2.304e-27	1.8777e-26
AT2G03505	AT2G03505	-	2:1064236-1065372	1064236	1065372	1137	866	-1.44368	0.000369054	0.000621465
AT1G63220	AT1G63220	-	1:23448919-23450452	23448919	23450452	1534	750	-1.44322	2.17748e-05	4.17089e-05
AT4G31820	ENP	-	4:15390650-15394430	15390650	15394430	3781	2657	-1.443	9.23806e-19	4.6581e-18
AT5G04660	CYP77A4	-	5:1335995-1337670	1335995	1337670	1676	1676	-1.44289	7.8937e-10	2.20054e-09
AT1G56690	AT1G56690	-	1:21253817-21255931	21253817	21255931	2115	2115	-1.44236	7.82356e-11	2.35639e-10
AT2G25210	AT2G25210	-	2:10739855-10740552	10739855	10740552	698	402	-1.44107	1.89697e-19	1.00595e-18
AT3G04790	AT3G04790	-	3:1313316-1315243	1313316	1315243	1928	1928	-1.44087	3.62826e-39	5.1137e-38
AT1G34430	EMB3003	-	1:12587752-12590192	12587752	12590192	2441	1781	-1.44087	5.56501e-34	6.18915e-33
AT4G24830	AT4G24830	-	4:12792873-12795974	12792873	12795974	3102	1814	-1.43881	2.06171e-24	1.45958e-23
AT5G64620	ATC/VIF2	-	5:25831834-25832502	25831834	25832502	669	669	-1.43753	2.01272e-07	4.62459e-07
AT5G55280	ATFTSZ1-1	-	5:22420652-22422649	22420652	22422649	1998	1512	-1.43727	1.26214e-29	1.1437e-28
AT2G20240	AT2G20240	-	2:8727626-8730500	8727626	8730500	2875	2463	-1.43685	5.18918e-08	1.25107e-07
AT4G20040	AT4G20040	-	4:10847299-10849115	10847299	10849115	1817	1653	-1.43589	9.5288e-09	2.43904e-08
AT3G55566	AT3G55566	-	3:20608742-20608840	20608742	20608840	99	99	-1.43436	5.82141e-06	1.17197e-05
AT3G23610	DSPTP1	-	3:8478122-8479857	8478122	8479857	1736	1091	-1.43425	1.29063e-08	3.26554e-08
AT1G67360	AT1G67360	-	1:25236811-25238216	25236811	25238216	1406	1287	-1.43367	1.15735e-26	9.15012e-26
AT4G24570	2002-12-01	-	4:12686459-12687650	12686459	12687650	1192	1192	-1.43356	1.067e-09	2.94443e-09
AT2G26730	AT2G26730	-	2:11388407-11391641	11388407	11391641	3235	2546	-1.43279	6.02787e-23	3.91834e-22
AT3G51160	MUR1	-	3:19007010-19008427	19007010	19008427	1418	1418	-1.4324	1.56506e-34	1.78878e-33
AT3G44890	RPL9	-	3:16386434-16388466	16386434	16388466	2033	920	-1.43238	2.06303e-32	2.14502e-31
AT2G35880	AT2G35880	-	2:15062988-15065870	15062988	15065870	2883	1824	-1.43093	2.93725e-25	2.17113e-24
AT5G60330	AT5G60330	-	5:24273128-24273634	24273128	24273634	507	507	-1.43072	0.000107902	0.000192848
AT1G69580	AT1G69580	-	1:26171943-26173612	26171943	26173612	1670	1198	-1.42998	9.44308e-09	2.41783e-08
AT2G16510	AT2G16510	-	2:7159629-7160892	7159629	7160892	1264	954	-1.42958	6.16169e-33	6.54732e-32
AT5G16390	BCCP	-	5:5360801-5363126	5360801	5363126	2326	1474	-1.42955	2.67304e-27	2.17114e-26
AT4G37470	AT4G37470	-	4:17616659-17618473	17616659	17618473	1815	1309	-1.42953	2.00481e-06	4.21925e-06
AT5G59480	AT5G59480	-	5:23979390-23981590	23979390	23981590	2201	1277	-1.4295	3.03098e-09	8.03531e-09
AT1G22840	CYTC-1	-	1:8079287-8080574	8079287	8080574	1288	734	-1.42945	9.50407e-25	6.84576e-24
AT4G30620	AT4G30620	-	4:14948586-14950072	14948586	14950072	1487	718	-1.42871	1.01286e-34	1.16948e-33
AT1G60950	FED.A	-	1:22444390-22445222	22444390	22445222	833	833	-1.42857	6.37987e-21	3.6933e-20
AT4G00490	BMY9	-	4:222320-225131	222320	225131	2812	2000	-1.42769	2.58206e-15	1.06238e-14
AT4G05400	AT4G05400	-	4:2741160-2742949	2741160	2742949	1790	1112	-1.42768	2.0301e-43	3.36897e-42
AT1G59720	CRR28	-	1:21939752-21941784	21939752	21941784	2033	2033	-1.42729	1.08643e-09	2.99559e-09
AT1G80460	NHO1	-	1:30246745-30249305	30246745	30249305	2561	2034	-1.42727	3.11989e-31	3.07394e-30
AT1G73570	AT1G73570	-	1:27650992-27653942	27650992	27653942	2951	1815	-1.42621	3.41943e-06	7.05517e-06
AT4G17300	NS1	-	4:9681539-9684975	9681539	9684975	3437	1865	-1.42614	2.24839e-24	1.58776e-23
AT1G08540	SIGB	-	1:2703336-2706845	2703336	2706845	3510	1993	-1.42612	6.82549e-31	6.59823e-30
AT4G39120	IMPL2	-	4:18220589-18227988	18220589	18227988	7400	1664	-1.42574	2.08601e-16	9.15003e-16
AT4G05390	ATRFNR1	-	4:2738531-2740667	2738531	2740667	2137	1629	-1.42502	2.76922e-33	2.99327e-32
AT2G41120	AT2G41120	-	2:17141275-17142457	17141275	17142457	1183	1003	-1.4242	0.000172293	0.000301033
AT5G53200	TRY	-	5:21582774-21584145	21582774	21584145	1372	645	-1.42398	1.0841e-06	2.33615e-06
AT2G24570	ATWRKY17	-	2:10437398-10439298	10437398	10439298	1901	1320	-1.42359	2.64265e-28	2.26492e-27
AT5G08300	AT5G08300	-	5:2667412-2669923	2667412	2669923	2512	1462	-1.42281	2.7749e-28	2.37466e-27
AT2G31680	AtRABA5d	-	2:13473594-13475052	13473594	13475052	1459	942	-1.42279	5.76585e-33	6.13827e-32
AT2G38810	HTA8	-	2:16219269-16220928	16219269	16220928	1660	808	-1.42246	3.44571e-33	3.71028e-32
AT3G52040	AT3G52040	-	3:19304170-19304861	19304170	19304861	692	530	-1.42105	9.90137e-23	6.3413e-22
AT1G53290	AT1G53290	-	1:19871299-19873490	19871299	19873490	2192	1331	-1.42089	5.18537e-13	1.81875e-12
AT3G54640	TSA1	-	3:20223148-20225523	20223148	20225523	2376	1342	-1.42043	5.02788e-33	5.3763e-32
AT2G42580	TTL3	-	2:17728715-17731718	17728715	17731718	3004	2473	-1.41862	2.06744e-18	1.02147e-17
AT5G60200	TMO6	-	5:24240975-24242523	24240975	24242523	1549	1449	-1.41816	1.15929e-19	6.22171e-19
AT3G52150	AT3G52150	-	3:19342024-19343466	19342024	19343466	1443	1188	-1.41807	1.047e-32	1.10215e-31
AT1G29310	AT1G29310	-	1:10252294-10254690	10252294	10254690	2397	1700	-1.41727	4.97979e-26	3.83498e-25
AT2G44650	CPN10	AT2G44660	2:18419370-18421110	18419370	18421110	1741	1171	-1.41612	1.48437e-32	1.55482e-31
AT3G26932	DRB3	-	3:9930270-9932120	9930270	9932120	1851	1676	-1.41569	5.87728e-30	5.43335e-29
AT5G01090	AT5G01090	-	5:32832-34326	32832	34326	1495	1495	-1.41561	8.76491e-15	3.47863e-14
AT4G04700	CPK27	-	4:2385276-2387986	2385276	2387986	2711	1458	-1.4152	4.79378e-06	9.7307e-06
AT1G76110	AT1G76110	-	1:28555042-28557586	28555042	28557586	2545	1383	-1.41516	3.5628e-07	8.01961e-07
AT3G23170	AT3G23170	-	3:8267942-8268735	8267942	8268735	794	794	-1.41511	2.51198e-09	6.70667e-09
AT1G75150	AT1G75150	-	1:28204387-28208573	28204387	28208573	4187	2738	-1.4147	1.89867e-07	4.37321e-07
AT1G20950	AT1G20950	-	1:7297239-7301415	7297239	7301415	4177	2152	-1.41458	1.49556e-20	8.50652e-20
AT2G18990	TXND9	-	2:8238691-8240002	8238691	8240002	1312	866	-1.41448	1.08543e-34	1.25217e-33
AT2G24390	AT2G24390	AT2G24380	2:10373570-10375011	10373570	10375011	1442	1042	-1.41439	7.61384e-11	2.29445e-10
AT2G35450	AT2G35450	-	2:14903045-14905372	14903045	14905372	2328	1208	-1.41336	5.75657e-15	2.31288e-14
AT1G64680	AT1G64680	-	1:24036021-24037401	24036021	24037401	1381	1142	-1.41306	9.42104e-18	4.49591e-17
AT4G39620	EMB2453	-	4:18395294-18397578	18395294	18397578	2285	1718	-1.41257	2.61197e-22	1.63087e-21
AT5G63100	AT5G63100	-	5:25314137-25315428	25314137	25315428	1292	1292	-1.41225	8.4144e-09	2.16098e-08
AT2G29050	ATRBL1	-	2:12478146-12480372	12478146	12480372	2227	1641	-1.41202	5.92371e-07	1.30629e-06
AT5G04480	AT5G04480	-	5:1271513-1277985	1271513	1277985	6473	3718	-1.41155	2.77389e-24	1.94586e-23
AT4G36420	AT4G36420	-	4:17203031-17204312	17203031	17204312	1282	874	-1.41093	3.84645e-37	4.94749e-36
AT2G17560	NFD4	-	2:7642165-7643667	7642165	7643667	1503	881	-1.41089	5.34722e-35	6.25951e-34
AT2G46830	CCA1	-	2:19245672-19248914	19245672	19248914	3243	2344	-1.41089	1.14057e-18	5.72384e-18
AT1G21740	AT1G21740	-	1:7641580-7645078	7641580	7645078	3499	2862	-1.40897	4.96298e-35	5.81776e-34
AT1G35680	AT1G35680	-	1:13208736-13210418	13208736	13210418	1683	876	-1.4088	5.17464e-29	4.58832e-28
AT5G47380	AT5G47380	-	5:19221472-19224591	19221472	19224591	3120	1977	-1.40821	4.38017e-06	8.9286e-06
AT1G68400	AT1G68400	-	1:25646039-25648946	25646039	25648946	2908	2405	-1.40816	2.25604e-26	1.75658e-25
AT1G05170	AT1G05170	-	1:1491111-1494248	1491111	1494248	3138	1890	-1.40804	1.1186e-17	5.30082e-17
AT2G19870	AT2G19870	-	2:8575878-8577947	8575878	8577947	2070	2070	-1.40774	1.88179e-37	2.45212e-36
AT5G59870	HTA6	-	5:24115381-24116220	24115381	24116220	840	753	-1.40739	2.38205e-33	2.57972e-32
AT2G20710	AT2G20710	-	2:8926006-8927844	8926006	8927844	1839	1839	-1.40681	3.99875e-22	2.46762e-21
AT3G02410	ICME-LIKE2	-	3:492118-494948	492118	494948	2831	1340	-1.40663	2.46487e-32	2.55342e-31
AT1G32860	AT1G32860	-	1:11907109-11908928	11907109	11908928	1820	1605	-1.4066	5.06421e-24	3.496e-23
AT3G55690	AT3G55690	-	3:20666972-20668505	20666972	20668505	1534	1246	-1.40651	3.1788e-19	1.66175e-18
AT1G11670	AT1G11670	-	1:3928162-3931576	3928162	3931576	3415	1964	-1.40584	2.54465e-19	1.33768e-18
AT1G42970	GAPB	-	1:16127381-16129843	16127381	16129843	2463	1774	-1.40516	2.93677e-11	9.10785e-11
AT3G44590	AT3G44590	-	3:16163817-16164931	16163817	16164931	1115	684	-1.40489	3.83582e-21	2.25213e-20
AT1G64620	AT1G64620	-	1:24006992-24008694	24006992	24008694	1703	1589	-1.40438	2.24697e-08	5.57854e-08
AT3G61070	PEX11E	-	3:22604094-22606878	22604094	22606878	2785	1830	-1.40437	9.92762e-31	9.53717e-30
AT3G20350	AT3G20350	-	3:7096348-7099767	7096348	7099767	3420	2671	-1.40432	1.41655e-12	4.81196e-12
AT2G37550	ASP1	-	2:15755097-15757601	15755097	15757601	2505	1882	-1.40431	3.70434e-27	2.99729e-26
AT3G03350	AT3G03350	-	3:791183-794812	791183	794812	3630	1429	-1.40366	0.00103631	0.00166523
AT3G02730	TRXF1	-	3:588408-589685	588408	589685	1278	793	-1.40352	2.02233e-11	6.34162e-11
AT2G32430	AT2G32430	-	2:13771296-13774502	13771296	13774502	3207	1960	-1.40337	2.99626e-07	6.78498e-07
AT4G37510	AT4G37510	-	4:17626104-17628947	17626104	17628947	2844	1862	-1.40276	3.00224e-31	2.96147e-30
AT1G69620	RPL34	-	1:26189836-26191323	26189836	26191323	1488	666	-1.4024	8.90942e-25	6.43112e-24
AT3G49790	AT3G49790	-	3:18468051-18469763	18468051	18469763	1713	1713	-1.40219	4.93204e-34	5.5069e-33
AT5G50810	TIM8	-	5:20675634-20676612	20675634	20676612	979	582	-1.40203	1.57864e-21	9.45902e-21
AT3G05590	RPL18	-	3:1621457-1623014	1621457	1623014	1558	857	-1.40133	2.41277e-24	1.69746e-23
AT1G68238	AT1G68238	-	1:25574461-25574835	25574461	25574835	375	375	-1.40037	0.00221412	0.00342863
AT2G25480	AT2G25480	-	2:10842863-10845698	10842863	10845698	2836	1722	-1.40029	7.44205e-12	2.40358e-11
AT1G13730	AT1G13730	-	1:4709824-4712550	4709824	4712550	2727	1773	-1.39968	1.55911e-30	1.48682e-29
AT2G26640	KCS11	-	2:11329870-11331858	11329870	11331858	1989	1823	-1.39959	1.10646e-06	2.38344e-06
AT3G56480	AT3G56480	-	3:20936098-20939631	20936098	20939631	3534	2164	-1.39871	1.58571e-12	5.36506e-12
AT4G13495	AT4G13495	AT4G13494	4:7842967-7846774	7842967	7846774	3808	1042	-1.39823	2.8774e-29	2.58386e-28
AT3G03770	AT3G03770	-	3:945135-949042	945135	949042	3908	2899	-1.39822	4.33341e-24	2.99884e-23
AT5G09490	AT5G09490	-	5:2952216-2953245	2952216	2953245	1030	683	-1.39779	0.000276512	0.000472254
AT2G43137	AT2G43137	-	2:17923081-17923157	17923081	17923157	77	77	-1.39746	0.00510745	0.00756443
AT4G15000	AT4G15000	-	4:8571833-8572489	8571833	8572489	657	657	-1.3969	1.87792e-27	1.54084e-26
AT4G37040	MAP1D	-	4:17455139-17457357	17455139	17457357	2219	1361	-1.39657	2.01797e-32	2.10205e-31
AT3G54750	AT3G54750	-	3:20264634-20268881	20264634	20268881	4248	2258	-1.39526	1.14019e-18	5.72363e-18
AT1G58380	XW6	-	1:21689032-21690256	21689032	21690256	1225	1109	-1.39363	1.5387e-25	1.15195e-24
AT5G07140	AT5G07140	-	5:2212826-2215530	2212826	2215530	2705	2200	-1.39286	2.14445e-10	6.25738e-10
AT3G03050	KJK	-	3:687052-691898	687052	691898	4847	4206	-1.39227	1.44783e-19	7.73595e-19
AT1G72570	AT1G72570	-	1:27331381-27333698	27331381	27333698	2318	1248	-1.3897	6.39874e-26	4.90763e-25
AT4G22540	ORP2A	-	4:11860444-11866364	11860444	11866364	5921	2911	-1.38909	5.98312e-15	2.39934e-14
AT2G35155	AT2G35155	-	2:14818994-14821965	14818994	14821965	2972	2263	-1.38902	2.31738e-14	8.92319e-14
AT3G10080	AT3G10080	-	3:3107275-3108177	3107275	3108177	903	903	-1.38857	1.08956e-05	2.14402e-05
AT1G07070	AT1G07070	-	1:2168564-2169851	2168564	2169851	1288	575	-1.3885	3.74382e-28	3.1845e-27
AT4G26230	AT4G26230	-	4:13285825-13286791	13285825	13286791	967	674	-1.38767	9.49237e-24	6.44773e-23
AT1G28400	AT1G28400	-	1:9972384-9973793	9972384	9973793	1410	1410	-1.38762	7.52288e-20	4.09058e-19
AT1G33470	AT1G33470	-	1:12144515-12147208	12144515	12147208	2694	2023	-1.38646	6.55846e-31	6.34371e-30
AT5G08170	ATAIH	-	5:2628325-2631098	2628325	2631098	2774	1541	-1.38639	5.62427e-18	2.71308e-17
AT3G09730	AT3G09730	-	3:2983934-2986455	2983934	2986455	2522	1377	-1.38613	2.07644e-09	5.58111e-09
AT5G55480	SVL1	-	5:22474230-22478132	22474230	22478132	3903	2661	-1.38503	6.18089e-27	4.94442e-26
AT5G17770	ATCBR	-	5:5864251-5866709	5864251	5866709	2459	1352	-1.38484	1.20072e-32	1.26083e-31
AT2G27030	CAM5	-	2:11532004-11534333	11532004	11534333	2330	2330	-1.38456	1.42417e-41	2.19953e-40
AT5G02540	AT5G02540	-	5:568524-570920	568524	570920	2397	1281	-1.38455	1.67796e-12	5.66469e-12
AT2G30575	LGT5	-	2:13020397-13024208	13020397	13024208	3812	2302	-1.38325	1.05726e-14	4.16678e-14
AT2G32640	AT2G32640	-	2:13846919-13850909	13846919	13850909	3991	2198	-1.38315	4.43204e-06	9.02999e-06
AT1G75080	BZR1	-	1:28185504-28188075	28185504	28188075	2572	1924	-1.3828	1.58982e-13	5.77984e-13
AT1G55265	AT1G55265	-	1:20617313-20618005	20617313	20618005	693	693	-1.38252	5.59379e-07	1.23676e-06
AT5G40200	DegP9	-	5:16070330-16073314	16070330	16073314	2985	2064	-1.38233	4.93608e-32	5.07613e-31
AT4G30975	AT4G30975	-	4:15075042-15077572	15075042	15077572	2531	739	-1.38217	0.000176492	0.000308084
AT1G75163	AT1G75163	-	1:28212395-28212474	28212395	28212474	80	80	-1.38138	4.25819e-06	8.68728e-06
AT5G10560	AT5G10560	-	5:3336255-3339366	3336255	3339366	3112	2474	-1.38103	2.57744e-34	2.91244e-33
AT1G27660	AT1G27660	-	1:9621570-9626004	9621570	9626004	4435	1831	-1.38007	3.96185e-13	1.4018e-12
AT4G25870	AT4G25870	-	4:13149691-13152277	13149691	13152277	2587	1513	-1.37946	2.43366e-17	1.13079e-16
AT5G55400	AT5G55400	-	5:22455535-22458950	22455535	22458950	3416	2145	-1.37926	1.23001e-20	7.01969e-20
AT2G38010	AT2G38010	-	2:15906862-15909931	15906862	15909931	3070	2443	-1.3789	8.34366e-11	2.50725e-10
[truncated: 1,100 more rows]

## Sheet: Down-reg
	symbol	sharedLocus	geneCoord	start	end	width	effWidth	logFC	pvalue	gen.fdr
AT1G70860	AT1G70860	-	1:26718320-26718992	26718320	26718992	673	480	10.1045	6.93416e-07	1.5204e-06
AT3G21352	AT3G21352	-	3:7519976-7520360	7519976	7520360	385	282	6.41113	4.19781e-28	3.56172e-27
AT2G46970	PIL1	-	2:19295490-19297826	19295490	19297826	2337	1526	5.95734	2.87964e-115	5.60006e-113
AT4G01970	AtSTS	-	4:853922-857008	853922	857008	3087	2837	5.83171	9.25051e-230	3.13167e-226
AT3G62090	PIL2	-	3:22988547-22990709	22988547	22990709	2163	1805	5.62148	2.8925e-290	4.89614e-286
AT4G09590	NHL22	-	4:6066128-6066763	6066128	6066763	636	636	5.58723	4.73532e-69	2.05525e-67
AT4G09610	GASA2	-	4:6074770-6075645	6074770	6075645	876	529	5.56532	1.32703e-95	1.48759e-93
AT3G55240	AT3G55240	-	3:20473541-20474763	20473541	20474763	1223	681	5.46592	2.12569e-43	3.5207e-42
AT1G77960	AT1G77960	-	1:29310057-29313571	29310057	29313571	3515	1673	5.34854	3.55176e-244	1.50302e-240
AT4G18690	AT4G18690	-	4:10282762-10283803	10282762	10283803	1042	1042	5.31322	2.98916e-259	1.68658e-255
AT5G66580	AT5G66580	-	5:26572631-26573408	26572631	26573408	778	778	5.15717	3.53954e-208	8.55911e-205
AT1G25310	MEE8	-	1:8874124-8874834	8874124	8874834	711	438	5.10839	1.87719e-262	1.58876e-258
AT2G29310	AT2G29310	-	2:12590058-12591363	12590058	12591363	1306	907	5.05566	2.71187e-30	2.55305e-29
AT2G35970	AT2G35970	-	2:15109007-15109773	15109007	15109773	767	767	4.86681	2.42717e-21	1.44107e-20
AT2G18050	HIS1-3	-	2:7845923-7846884	7845923	7846884	962	769	4.69388	3.78109e-198	8.00032e-195
AT5G37240	AT5G37240	-	5:14737560-14739256	14737560	14739256	1697	477	4.62946	7.28909e-14	2.71911e-13
AT2G02930	ATGSTF3	-	2:851164-852222	851164	852222	1059	939	4.58428	7.61929e-88	6.61393e-86
AT4G16780	ATHB2	-	4:9449114-9450743	9449114	9450743	1630	1171	4.57406	2.72294e-215	7.68188e-212
AT4G09600	GASA3	-	4:6072804-6073612	6072804	6073612	809	606	4.54543	1.28075e-108	2.08454e-106
AT2G33830	AT2G33830	-	2:14309484-14310351	14309484	14310351	868	676	4.48982	2.26216e-163	2.39322e-160
AT2G29320	AT2G29320	-	2:12592148-12593686	12592148	12593686	1539	1151	4.42335	1.75546e-27	1.44456e-26
AT5G44120	CRU1	-	5:17756264-17758288	17756264	17758288	2025	1791	4.3571	5.19941e-151	3.03484e-148
AT1G16850	AT1G16850	-	1:5764807-5765651	5764807	5765651	845	747	4.34526	8.89222e-127	2.46752e-124
AT3G19663	AT3G19663	-	3:6826768-6826911	6826768	6826911	144	144	4.26748	1.25965e-16	5.61109e-16
AT1G49938	AT1G49938	-	1:18487545-18488107	18487545	18488107	563	198	4.21938	2.0641e-08	5.14111e-08
AT2G41260	M17	-	2:17206510-17207698	17206510	17207698	1189	1080	4.21878	9.78052e-158	8.27774e-155
AT1G70840	MLP31	-	1:26712982-26714066	26712982	26714066	1085	756	4.19054	4.17375e-85	3.22599e-83
AT3G25260	AT3G25260	-	3:9199438-9202000	9199438	9202000	2563	1940	4.16324	3.59167e-167	4.67663e-164
AT3G28740	CYP81D1	-	3:10788698-10790553	10788698	10790553	1856	1597	4.15599	5.23872e-107	8.13539e-105
AT1G77950	AGL67	-	1:29306957-29311194	29306957	29311194	4238	1102	4.09138	2.42971e-167	3.42731e-164
AT5G45310	AT5G45310	-	5:18359275-18361114	18359275	18361114	1840	1289	4.08177	3.93234e-146	2.14718e-143
AT1G11785	AT1G11785	-	1:3979862-3980956	3979862	3980956	1095	481	4.06262	2.48811e-14	9.55016e-14
AT2G29340	AT2G29340	-	2:12597115-12599203	12597115	12599203	2089	1355	4.05184	7.5486e-41	1.13376e-39
AT2G23240	AT2G23240	-	2:9895855-9896325	9895855	9896325	471	402	4.04752	2.98007e-111	5.30986e-109
AT2G27940	AT2G27940	-	2:11897942-11898867	11897942	11898867	926	860	4.04326	5.84409e-148	3.29743e-145
AT2G29300	AT2G29300	-	2:12588191-12589759	12588191	12589759	1569	1200	4.03605	1.34845e-153	9.13008e-151
AT2G01580	AT2G01580	-	2:265044-265905	265044	265905	862	862	3.9914	7.90154e-22	4.79904e-21
AT3G22640	PAP85	-	3:8011724-8013902	8011724	8013902	2179	1658	3.97437	1.92057e-142	8.33577e-140
AT2G19900	ATNADP-ME1	-	2:8591899-8595478	8591899	8595478	3580	2028	3.9659	2.96486e-169	4.56238e-166
AT5G25180	CYP71B14	-	5:8694630-8697108	8694630	8697108	2479	1565	3.95146	1.13044e-96	1.32882e-94
AT4G18620	PYL13	-	4:10254359-10254853	10254359	10254853	495	495	3.94135	1.0338e-48	2.13404e-47
AT1G74650	ATMYB31	-	1:28041191-28042995	28041191	28042995	1805	1517	3.93577	1.91133e-28	1.65067e-27
AT5G44360	AT5G44360	-	5:17871924-17873698	17871924	17873698	1775	1775	3.89411	3.5505e-19	1.85206e-18
AT3G56350	AT3G56350	-	3:20893946-20895625	20893946	20895625	1680	935	3.88029	7.08292e-111	1.23601e-108
AT3G22500	ATECP31	-	3:7971625-7972907	7971625	7972907	1283	1108	3.87102	1.87697e-94	1.98571e-92
AT2G28490	AT2G28490	-	2:12178597-12181012	12178597	12181012	2416	1780	3.84605	3.35449e-159	2.9885e-156
AT5G66430	AT5G66430	-	5:26525410-26526799	26525410	26526799	1390	1065	3.82676	4.98194e-72	2.41631e-70
AT1G65960	GAD2	-	1:24552003-24557730	24552003	24557730	5728	2106	3.82377	1.8798e-53	4.55864e-52
AT1G33102	AT1G33102	-	1:12002333-12002877	12002333	12002877	545	545	3.81862	3.5181e-70	1.58802e-68
AT3G26770	AT3G26770	-	3:9845396-9847148	9845396	9847148	1753	1088	3.79047	1.17271e-182	1.98504e-179
AT4G20260	PCAP1	-	4:10940746-10943561	10940746	10943561	2816	1141	3.79037	1.79106e-101	2.3143e-99
AT5G50700	HSD1	-	5:20623024-20625034	20623024	20625034	2011	1324	3.7899	2.3358e-95	2.5674e-93
AT1G49500	AT1G49500	-	1:18321295-18322284	18321295	18322284	990	990	3.77945	1.22463e-19	6.56406e-19
AT1G14950	AT1G14950	-	1:5157336-5158269	5157336	5158269	934	845	3.77402	2.92836e-70	1.32536e-68
AT5G50600	ATHSD1	-	5:20589702-20591689	20589702	20591689	1988	1301	3.7739	1.01087e-99	1.26748e-97
AT3G05260	AT3G05260	-	3:1497483-1499004	1497483	1499004	1522	1137	3.76462	1.70945e-108	2.7558e-106
AT2G47180	AtGolS1	-	2:19368798-19370441	19368798	19370441	1644	1355	3.76182	1.13129e-144	5.80281e-142
AT2G31585	AT2G31585	-	2:13446002-13446729	13446002	13446729	728	728	3.74308	3.64802e-81	2.47992e-79
AT5G35660	AT5G35660	-	5:13852390-13853717	13852390	13853717	1328	1251	3.74011	2.22017e-118	4.94483e-116
AT5G15265	AT5G15265	-	5:4956501-4957533	4956501	4957533	1033	438	3.73498	4.87587e-15	1.97025e-14
AT5G05320	AT5G05320	-	5:1575006-1576731	1575006	1576731	1726	1360	3.71092	3.00188e-138	1.15484e-135
AT5G24355	AT5G24355	-	5:8314905-8315246	8314905	8315246	342	342	3.70022	1.54388e-18	7.6953e-18
AT1G54860	AT1G54860	-	1:20457421-20458631	20457421	20458631	1211	901	3.68364	9.82325e-76	5.5059e-74
AT3G50740	UGT72E1	-	3:18855161-18856884	18855161	18856884	1724	1724	3.681	1.10348e-103	1.55655e-101
AT4G18650	AT4G18650	-	4:10263969-10265439	10263969	10265439	1471	790	3.666	1.46887e-152	9.20871e-150
AT1G70850	MLP34	-	1:26714866-26716829	26714866	26716829	1964	1294	3.66237	3.7454e-50	8.09686e-49
AT1G21680	AT1G21680	-	1:7613005-7615339	7613005	7615339	2335	2335	3.64677	2.75872e-140	1.11183e-137
AT2G41070	DPBF4	-	2:17130774-17132386	17130774	17132386	1613	1442	3.64197	8.76099e-154	6.17905e-151
AT5G62800	AT5G62800	-	5:25218663-25219967	25218663	25219967	1305	1047	3.63232	6.43482e-136	2.26921e-133
AT2G37290	AT2G37290	-	2:15656427-15661685	15656427	15661685	5259	3609	3.6283	1.94647e-59	5.8212e-58
AT5G02200	FHL	-	5:437460-438894	437460	438894	1435	1349	3.6038	1.85495e-189	3.48875e-186
AT1G11210	AT1G11210	-	1:3755677-3756998	3755677	3756998	1322	1213	3.60115	1.29795e-26	1.02378e-25
AT1G70985	AT1G70985	-	1:26764672-26765285	26764672	26765285	614	614	3.59931	1.88076e-68	7.93905e-67
AT3G24503	ALDH2C4	-	3:8919560-8923073	8919560	8923073	3514	1722	3.59908	2.47969e-166	2.99812e-163
AT4G26740	ATS1	-	4:13473516-13475328	13473516	13475328	1813	1063	3.58695	6.98567e-146	3.6952e-143
AT2G42560	AT2G42560	-	2:17714638-17716912	17714638	17716912	2275	2174	3.58663	3.09241e-111	5.45264e-109
AT5G38780	AT5G38780	-	5:15530015-15531522	15530015	15531522	1508	1215	3.57715	6.93739e-94	7.16032e-92
AT1G28940	AT1G28940	-	1:10106528-10106599	10106528	10106599	72	72	3.5764	5.32287e-08	1.28184e-07
AT1G21400	AT1G21400	-	1:7493426-7496710	7493426	7496710	3285	1955	3.57627	9.0176e-74	4.64429e-72
AT2G19320	AT2G19320	-	2:8370691-8371108	8370691	8371108	418	418	3.57543	6.72643e-85	5.17538e-83
AT5G07190	ATS3	-	5:2237507-2238671	2237507	2238671	1165	1017	3.57362	1.46591e-23	9.84268e-23
AT5G66110	HIPP27	-	5:26430202-26430912	26430202	26430912	711	621	3.57051	1.80602e-138	7.10942e-136
AT2G33070	ATNSP2	-	2:14028282-14031164	14028282	14031164	2883	2085	3.56711	1.6342e-35	1.95908e-34
AT1G20620	CAT3	-	1:7143067-7146540	7143067	7146540	3474	2088	3.56576	6.15273e-152	3.71955e-149
AT3G51810	ATEM1	-	3:19214748-19215831	19214748	19215831	1084	899	3.56551	3.11517e-75	1.69008e-73
AT3G23175	AT3G23175	-	3:8274000-8275470	8274000	8275470	1471	942	3.55951	1.36152e-33	1.48782e-32
AT4G28520	CRU3	-	4:14087556-14089796	14087556	14089796	2241	1798	3.54369	9.87292e-87	8.07338e-85
AT1G30040	GA2OX2	-	1:10537648-10539831	10537648	10539831	2184	1866	3.54365	2.10867e-165	2.37956e-162
AT5G53260	AT5G53260	-	5:21604662-21605674	21604662	21605674	1013	531	3.53721	1.11033e-87	9.44451e-86
AT5G07200	ATGA20OX3	-	5:2243553-2245339	2243553	2245339	1787	1607	3.53367	1.49564e-161	1.48922e-158
AT1G73190	ALPHA-TIP	-	1:27521944-27523332	27521944	27523332	1389	1179	3.53141	1.63461e-118	3.73906e-116
AT1G65970	TPX2	-	1:24557372-24558322	24557372	24558322	951	737	3.52193	4.21309e-79	2.65111e-77
AT1G62420	AT1G62420	-	1:23102793-23104647	23102793	23104647	1855	1039	3.52155	7.23531e-144	3.402e-141
AT5G36220	CYP81D1	-	5:14253690-14256033	14253690	14256033	2344	1664	3.51483	1.53705e-45	2.78263e-44
AT1G11175	AT1G11175	-	1:3744858-3745655	3744858	3745655	798	798	3.50797	1.28181e-80	8.60997e-79
AT1G56600	AtGolS2	-	1:21207537-21209596	21207537	21209596	2060	1396	3.50606	6.92639e-113	1.3027e-110
AT1G17810	BETA-TIP	-	1:6130025-6131627	6130025	6131627	1603	1173	3.50451	1.97306e-68	8.30798e-67
AT2G46660	CYP78A6	-	2:19153328-19155489	19153328	19155489	2162	1939	3.5016	8.39133e-31	8.07504e-30
AT5G53895	AT5G53895	-	5:21880619-21881204	21880619	21881204	586	485	3.47619	5.35996e-59	1.56969e-57
AT5G54740	SESA5	-	5:22238358-22239187	22238358	22239187	830	830	3.47487	2.63876e-104	3.75347e-102
AT3G21380	AT3G21380	-	3:7528184-7530677	7528184	7530677	2494	1662	3.47046	1.36057e-48	2.79495e-47
AT5G54000	AT5G54000	-	5:21917776-21919064	21917776	21919064	1289	1050	3.45068	2.39249e-86	1.91932e-84
AT1G68250	AT1G68250	-	1:25579373-25580194	25579373	25580194	822	822	3.44187	5.56916e-77	3.23949e-75
AT1G16770	AT1G16770	-	1:5737878-5739377	5737878	5739377	1500	1355	3.43698	7.52537e-119	1.74496e-116
AT2G15010	AT2G15010	-	2:6484379-6485154	6484379	6485154	776	604	3.43616	9.32863e-113	1.73523e-110
AT2G42000	AT2G42000	-	2:17529243-17530443	17529243	17530443	1201	677	3.43289	4.23449e-41	6.41695e-40
AT1G01480	ACS2	-	1:175782-178400	175782	178400	2619	1986	3.42722	9.80288e-67	3.81456e-65
AT2G25900	ATCTH	-	2:11041331-11043209	11041331	11043209	1879	1787	3.42161	8.27966e-144	3.78783e-141
AT2G45210	AT2G45210	-	2:18641566-18642704	18641566	18642704	1139	1139	3.41282	4.37124e-67	1.7369e-65
AT5G53270	AT5G53270	-	5:21606271-21607297	21606271	21607297	1027	872	3.41075	4.76651e-133	1.49412e-130
AT3G61450	SYP73	-	3:22738353-22740096	22738353	22740096	1744	1044	3.41048	7.29935e-19	3.71262e-18
AT1G03106	AT1G03106	-	1:748102-749034	748102	749034	933	933	3.40404	2.46363e-89	2.23004e-87
AT5G04500	AT5G04500	-	5:1283468-1286359	1283468	1286359	2892	2638	3.38746	1.23434e-134	4.09679e-132
AT2G47770	ATTSPO	-	2:19568464-19569507	19568464	19569507	1044	1044	3.38646	1.26437e-77	7.64359e-76
AT1G60680	AT1G60680	-	1:22347622-22349297	22347622	22349297	1676	1304	3.38229	6.1376e-120	1.46326e-117
AT1G49940	AT1G49940	-	1:18488360-18491179	18488360	18491179	2820	1119	3.37066	3.78763e-56	9.97096e-55
AT5G02750	AT5G02750	-	5:620094-621179	620094	621179	1086	1086	3.36141	3.92018e-96	4.48358e-94
AT1G70890	MLP43	-	1:26725626-26726544	26725626	26726544	919	818	3.35998	1.01279e-37	1.33412e-36
AT5G55450	AT5G55450	-	5:22467430-22468263	22467430	22468263	834	740	3.35601	1.11294e-39	1.59786e-38
AT1G48130	ATPER1	-	1:17780502-17781727	17780502	17781727	1226	986	3.35327	3.20746e-95	3.4803e-93
AT5G55135	AT5G55135	-	5:22379921-22380386	22379921	22380386	466	377	3.35094	5.19032e-72	2.51019e-70
AT5G24950	CYP71A15	-	5:8595209-8597761	8595209	8597761	2553	1491	3.35034	1.05884e-20	6.06735e-20
AT3G21370	BGLU19	-	3:7524054-7527652	7524054	7527652	3599	1889	3.34952	1.52212e-112	2.80053e-110
AT4G36700	AT4G36700	-	4:17298200-17300367	17298200	17300367	2168	1842	3.34793	3.96422e-138	1.49116e-135
AT1G27990	AT1G27990	-	1:9752799-9753952	9752799	9753952	1154	849	3.3197	7.66827e-107	1.16938e-104
AT1G16260	AT1G16260	-	1:5559579-5562113	5559579	5562113	2535	2387	3.31907	2.77089e-45	4.96327e-44
AT2G29330	TRI	-	2:12594590-12596330	12594590	12596330	1741	931	3.315	2.75876e-15	1.13316e-14
AT5G48412	AT5G48412	-	5:19623516-19624232	19623516	19624232	717	717	3.31366	1.51265e-84	1.14819e-82
AT4G34881	AT4G34881	-	4:16617623-16618506	16617623	16618506	884	884	3.3108	1.07867e-80	7.27435e-79
AT3G50480	HR4	-	3:18733068-18734388	18733068	18734388	1321	1030	3.30406	1.93379e-21	1.15258e-20
AT3G58200	AT3G58200	-	3:21559893-21561465	21559893	21561465	1573	1260	3.30229	1.40777e-117	2.97866e-115
AT2G14878	AT2G14878	-	2:6392167-6393042	6392167	6393042	876	876	3.30227	1.48548e-81	1.018e-79
AT3G58450	AT3G58450	-	3:21621997-21623166	21621997	21623166	1170	759	3.30185	4.42286e-78	2.69301e-76
AT1G54870	AT1G54870	-	1:20459006-20460647	20459006	20460647	1642	1243	3.29605	1.41077e-101	1.85117e-99
AT3G05300	AT3G05300	-	3:1508024-1508611	1508024	1508611	588	466	3.29371	1.02165e-17	4.85634e-17
AT1G17830	AT1G17830	-	1:6135803-6138432	6135803	6138432	2630	1589	3.29053	5.10345e-137	1.838e-134
AT5G43770	AT5G43770	-	5:17588790-17589467	17588790	17589467	678	678	3.26809	2.86714e-51	6.43995e-50
AT5G01300	AT5G01300	-	5:121483-122525	121483	122525	1043	944	3.26069	1.70289e-79	1.08773e-77
AT3G19290	AREB2	-	3:6687140-6690123	6687140	6690123	2984	1850	3.25921	2.686e-121	6.58927e-119
AT1G77450	anac032	-	1:29099954-29101261	29099954	29101261	1308	1117	3.25511	3.34274e-106	4.96338e-104
AT1G67855	AT1G67855	-	1:25442256-25442876	25442256	25442876	621	467	3.24317	5.90952e-15	2.37208e-14
AT2G28780	AT2G28780	-	2:12340034-12343421	12340034	12343421	3388	2596	3.23867	8.62467e-25	6.23888e-24
AT3G21360	AT3G21360	-	3:7522804-7524580	7522804	7524580	1777	1598	3.23716	1.94721e-58	5.56765e-57
AT4G34480	AT4G34480	-	4:16480934-16483995	16480934	16483995	3062	1735	3.23473	8.6829e-75	4.65112e-73
AT3G04040	AT3G04040	-	3:1047640-1049260	1047640	1049260	1621	765	3.2271	7.67881e-31	7.40622e-30
AT4G12290	AT4G12290	-	4:7304405-7307138	7304405	7307138	2734	2420	3.22305	2.25218e-129	6.46147e-127
AT5G15720	GLIP7	-	5:5124525-5126181	5124525	5126181	1657	1280	3.21882	2.5761e-19	1.35379e-18
AT1G10070	BCAT-2	-	1:3288087-3290471	3288087	3290471	2385	1752	3.20785	4.76021e-89	4.26329e-87
AT1G77530	AT1G77530	-	1:29136037-29137555	29136037	29137555	1519	1278	3.19877	1.23276e-19	6.60554e-19
AT5G50240	AtPIMT2	-	5:20451228-20452569	20451228	20452569	1342	1073	3.1947	5.76449e-82	3.999e-80
AT5G53220	AT5G53220	-	5:21595990-21598224	21595990	21598224	2235	2060	3.18667	1.12808e-106	1.70491e-104
AT4G11310	AT4G11310	-	4:6883551-6885517	6883551	6885517	1967	1337	3.18213	2.27928e-113	4.33498e-111
AT1G33640	AT1G33640	-	1:12195722-12195970	12195722	12195970	249	156	3.18141	2.86378e-12	9.51615e-12
AT1G74150	AT1G74150	-	1:27880528-27883626	27880528	27883626	3099	1710	3.18103	3.73363e-25	2.7454e-24
AT4G02690	AT4G02690	-	4:1185751-1187816	1185751	1187816	2066	1301	3.17912	5.25437e-131	1.58823e-128
AT4G02520	ATPM24.1	-	4:1110452-1111660	1110452	1111660	1209	989	3.17304	1.26362e-58	3.63147e-57
AT2G31985	AT2G31985	-	2:13613928-13615692	13613928	13615692	1765	957	3.16703	1.81068e-39	2.57125e-38
AT1G13150	CYP86C4	-	1:4481875-4483696	4481875	4483696	1822	1822	3.16436	9.37743e-37	1.18368e-35
AT5G59170	AT5G59170	-	5:23881988-23883122	23881988	23883122	1135	1135	3.16381	5.75835e-30	5.32922e-29
AT5G58660	AT5G58660	-	5:23701467-23703988	23701467	23703988	2522	1287	3.16149	3.78921e-97	4.48531e-95
AT1G03470	AT1G03470	-	1:865915-867733	865915	867733	1819	1247	3.16038	1.9026e-124	4.95465e-122
AT1G05510	AT1G05510	-	1:1629446-1630863	1629446	1630863	1418	980	3.15053	8.43468e-47	1.61326e-45
AT1G30220	ATINT2	-	1:10632821-10635471	10632821	10635471	2651	1911	3.14692	9.42487e-80	6.06596e-78
AT1G15190	AT1G15190	-	1:5227053-5228202	5227053	5228202	1150	1150	3.14291	3.07143e-34	3.45909e-33
AT4G19390	AT4G19390	-	4:10574768-10576428	10574768	10576428	1661	1030	3.13536	3.0878e-65	1.1412e-63
AT1G36060	AT1G36060	-	1:13454496-13456331	13454496	13456331	1836	1836	3.13144	4.88854e-78	2.96589e-76
AT3G14990	AT3G14990	-	3:5047400-5049877	5047400	5049877	2478	1593	3.12842	4.82124e-118	1.04627e-115
AT1G29680	AT1G29680	-	1:10377790-10378961	10377790	10378961	1172	854	3.1274	4.10735e-66	1.56236e-64
AT2G41280	M10	-	2:17209697-17210423	17209697	17210423	727	602	3.12685	3.67764e-87	3.03666e-85
AT5G40420	OLEO2	-	5:16173393-16174783	16173393	16174783	1391	872	3.11993	1.19433e-78	7.40531e-77
AT5G45690	AT5G45690	-	5:18534999-18536316	18534999	18536316	1318	941	3.11784	8.05095e-59	2.34558e-57
AT1G14930	AT1G14930	-	1:5152263-5153084	5152263	5153084	822	719	3.11446	6.46311e-77	3.74661e-75
AT3G26790	FUS3	-	3:9853828-9855989	9853828	9855989	2162	1380	3.11366	1.0678e-26	8.45397e-26
AT1G30860	AT1G30860	-	1:10986523-10989504	10986523	10989504	2982	2624	3.10909	1.39512e-130	4.14302e-128
AT2G01021	AT2G01021	-	2:6571-6672	6571	6672	102	102	3.10684	4.0821e-06	8.34917e-06
AT5G21020	AT5G21020	-	5:7138762-7139661	7138762	7139661	900	900	3.09742	5.30486e-80	3.47163e-78
AT1G31485	AT1G31485	-	1:11271744-11273075	11271744	11273075	1332	1220	3.09489	1.67452e-29	1.51252e-28
AT1G67856	AT1G67856	-	1:25442404-25443019	25442404	25443019	616	616	3.09062	1.97936e-15	8.20388e-15
AT1G33615	AT1G33615	-	1:12193325-12194374	12193325	12194374	1050	546	3.08851	6.21324e-62	2.05013e-60
AT2G22820	AT2G22820	-	2:9721231-9721425	9721231	9721425	195	195	3.07371	1.1141e-16	4.97318e-16
AT3G13277	AT3G13277	-	3:4290082-4291595	4290082	4291595	1514	1514	3.06644	2.00705e-38	2.73098e-37
AT4G18205	AT4G18205	-	4:10073758-10075271	10073758	10075271	1514	1432	3.06427	1.23215e-50	2.7157e-49
AT4G07408	AT4G07408	-	4:4201005-4201193	4201005	4201193	189	189	3.05912	2.55346e-26	1.9845e-25
AT4G25140	OLEO1	-	4:12900430-12901577	12900430	12901577	1148	908	3.05587	3.64351e-58	1.02789e-56
AT1G47980	AT1G47980	-	1:17691834-17693867	17691834	17693867	2034	1148	3.05328	5.34081e-57	1.44646e-55
AT4G18660	AT4G18660	-	4:10273480-10274872	10273480	10274872	1393	1393	3.04908	7.31299e-41	1.09935e-39
AT2G35345	AT2G35345	-	2:14880274-14880636	14880274	14880636	363	363	3.04633	9.69649e-30	8.87203e-29
AT4G31830	AT4G31830	-	4:15400604-15401147	15400604	15401147	544	544	3.03851	7.95561e-84	5.88055e-82
AT3G22740	HMT3	-	3:8032959-8035809	8032959	8035809	2851	1384	3.03292	2.03893e-83	1.49407e-81
AT1G07645	DSI-1VOC	-	1:2367437-2368385	2367437	2368385	949	625	3.02721	5.71695e-54	1.4231e-52
AT4G10020	HSD5	-	4:6268289-6270434	6268289	6270434	2146	1499	3.0248	3.44839e-118	7.58063e-116
AT2G33520	AT2G33520	-	2:14196752-14197706	14196752	14197706	955	610	3.02169	2.54474e-80	1.68261e-78
AT2G21820	AT2G21820	-	2:9302885-9303247	9302885	9303247	363	363	3.02127	1.49279e-56	3.98556e-55
AT5G01670	AT5G01670	-	5:251814-253960	251814	253960	2147	1340	3.01928	7.86721e-60	2.39511e-58
AT2G05580	AT2G05580	-	2:2055549-2056700	2055549	2056700	1152	1075	3.01357	1.38812e-89	1.26327e-87
AT2G39570	AT2G39570	-	2:16507896-16510198	16507896	16510198	2303	1760	3.00927	8.19638e-108	1.30887e-105
AT1G33340	AT1G33340	-	1:12087580-12088958	12087580	12088958	1379	1379	3.00818	2.05704e-28	1.77289e-27
AT3G01570	AT3G01570	-	3:221939-222827	221939	222827	889	814	3.00022	8.10997e-75	4.37189e-73
AT2G13547	AT2G13547	-	2:5647172-5647384	5647172	5647384	213	213	2.99024	5.24105e-25	3.83883e-24
AT5G22470	AT5G22470	-	5:7446974-7451049	7446974	7451049	4076	2822	2.98797	2.32374e-116	4.73903e-114
AT5G18450	AT5G18450	-	5:6116097-6117020	6116097	6117020	924	924	2.98574	2.09818e-141	8.66242e-139
AT2G18540	AT2G18540	-	2:8042382-8045008	8042382	8045008	2627	2124	2.98303	7.77204e-39	1.07306e-37
AT2G42890	ML2	-	2:17849819-17854553	17849819	17854553	4735	3222	2.97427	2.19091e-135	7.41711e-133
AT4G25580	AT4G25580	-	4:13056184-13058802	13056184	13058802	2619	2162	2.97171	1.08621e-94	1.15637e-92
AT5G04010	AT5G04010	-	5:1080105-1081074	1080105	1081074	970	970	2.97025	1.61118e-68	6.83522e-67
AT1G58235	AT1G58235	-	1:21579685-21580696	21579685	21580696	1012	1012	2.96865	9.29265e-64	3.24323e-62
AT4G33980	AT4G33980	-	4:16282696-16285059	16282696	16285059	2364	1121	2.9685	7.22919e-138	2.66019e-135
AT1G35516	AT1G35516	-	1:13078618-13079773	13078618	13079773	1156	781	2.96735	8.20426e-92	8.02737e-90
AT5G59340	WOX2	-	5:23933404-23934690	23933404	23934690	1287	850	2.96532	1.3233e-66	5.10238e-65
AT5G55750	AT5G55750	-	5:22564801-22566021	22564801	22566021	1221	565	2.96365	7.04098e-26	5.38557e-25
AT1G62290	AT1G62290	-	1:23009911-23013529	23009911	23013529	3619	1840	2.96344	6.70813e-84	5.00214e-82
AT4G28005	AT4G28005	-	4:13929655-13930191	13929655	13930191	537	348	2.96007	4.28722e-19	2.22266e-18
AT5G26970	AT5G26970	-	5:9487060-9487386	9487060	9487386	327	327	2.95358	5.76571e-16	2.4658e-15
AT1G75490	AT1G75490	-	1:28335502-28336706	28335502	28336706	1205	1205	2.95302	4.78632e-65	1.74985e-63
AT5G42900	COR27	-	5:17197641-17199793	17197641	17199793	2153	1102	2.93383	1.35398e-70	6.1943e-69
AT1G09260	AT1G09260	-	1:2993404-2993820	2993404	2993820	417	417	2.93272	7.09625e-10	1.98707e-09
AT5G55240	ATPXG2	-	5:22405926-22407351	22405926	22407351	1426	962	2.92826	1.60243e-77	9.6528e-76
AT1G31490	AT1G31490	-	1:11271228-11273294	11271228	11273294	2067	2067	2.92792	4.12024e-68	1.71359e-66
AT1G13340	AT1G13340	-	1:4569448-4571118	4569448	4571118	1671	1479	2.92729	1.90262e-92	1.89445e-90
AT3G63040	AT3G63040	-	3:23296572-23297225	23296572	23297225	654	654	2.92472	4.45407e-41	6.73763e-40
AT2G31350	GLX2-5	-	2:13368292-13371057	13368292	13371057	2766	1389	2.92363	1.24191e-116	2.56363e-114
AT1G75830	LCR67	-	1:28472357-28472891	28472357	28472891	535	428	2.91811	4.39333e-62	1.45246e-60
AT1G78070	AT1G78070	-	1:29355022-29358993	29355022	29358993	3972	2077	2.91624	3.7789e-119	8.88409e-117
AT2G34315	AT2G34315	-	2:14480219-14483056	14480219	14483056	2838	1004	2.91216	1.50962e-74	8.03565e-73
AT5G61610	AT5G61610	-	5:24770099-24771252	24770099	24771252	1154	885	2.91096	5.08611e-40	7.42177e-39
AT1G31750	AT1G31750	-	1:11370659-11372077	11370659	11372077	1419	727	2.90926	1.05441e-51	2.40864e-50
AT4G15398	CYP702A7P	-	4:8811525-8811635	8811525	8811635	111	111	2.90703	7.69371e-09	1.98191e-08
AT1G64900	CYP89A2	-	1:24113215-24114984	24113215	24114984	1770	1770	2.9067	1.327e-71	6.27434e-70
AT5G42825	AT5G42825	-	5:17171964-17172742	17171964	17172742	779	779	2.90612	2.08435e-75	1.14551e-73
AT1G03990	AT1G03990	-	1:1024847-1027616	1024847	1027616	2770	2277	2.89729	1.54231e-117	3.22305e-115
AT4G13180	AT4G13180	-	4:7657196-7658197	7657196	7658197	1002	1002	2.88841	3.1788e-46	5.88705e-45
AT3G17220	ATPMEI2	-	3:5883328-5883849	5883328	5883849	522	522	2.88288	1.35753e-09	3.71046e-09
AT1G15740	AT1G15740	-	1:5410908-5414919	5410908	5414919	4012	2295	2.8769	1.01076e-86	8.22553e-85
AT1G64660	ATMGL	-	1:24028918-24030780	24028918	24030780	1863	1628	2.87402	5.19495e-102	6.92401e-100
AT4G27310	AT4G27310	-	4:13675638-13676910	13675638	13676910	1273	1181	2.86473	1.20143e-46	2.27734e-45
AT2G45360	AT2G45360	-	2:18698592-18699514	18698592	18699514	923	829	2.8635	7.06373e-74	3.67901e-72
AT2G34600	TIFY5B	-	2:14573080-14573856	14573080	14573856	777	677	2.86313	1.63274e-13	5.9244e-13
AT1G76990	ACR3	-	1:28932162-28935550	28932162	28935550	3389	2430	2.85805	2.11705e-92	2.09563e-90
AT1G80180	AT1G80180	-	1:30156826-30157584	30156826	30157584	759	759	2.85783	8.92949e-61	2.82522e-59
AT2G27310	AT2G27310	-	2:11683862-11684967	11683862	11684967	1106	1106	2.84958	1.88503e-21	1.12391e-20
AT4G18680	AT4G18680	-	4:10281033-10281740	10281033	10281740	708	708	2.84848	3.07621e-99	3.80081e-97
AT2G25890	AT2G25890	-	2:11037380-11038126	11037380	11038126	747	747	2.84594	8.74476e-85	6.69761e-83
AT3G18570	AT3G18570	-	3:6395860-6396606	6395860	6396606	747	747	2.84195	2.9831e-64	1.06755e-62
AT1G25275	AT1G25275	-	1:8860671-8861364	8860671	8861364	694	518	2.83773	2.00601e-58	5.72608e-57
AT2G25340	ATVAMP712	-	2:10792664-10793832	10792664	10793832	1169	660	2.83432	1.03031e-38	1.41904e-37
AT2G42090	ACT9	-	2:17556744-17558369	17556744	17558369	1626	1101	2.83066	2.79511e-08	6.88486e-08
AT2G40170	EM6	-	2:16779552-16780258	16779552	16780258	707	610	2.82692	3.69523e-56	9.74286e-55
AT2G46980	AT2G46980	-	2:19299492-19304191	19299492	19304191	4700	3047	2.82572	3.26288e-85	2.53352e-83
AT1G03880	CRU2	-	1:985751-988146	985751	988146	2396	1633	2.82336	2.76057e-42	4.39174e-41
AT4G03200	AT4G03200	-	4:1408159-1412756	1408159	1412756	4598	2980	2.82298	1.23504e-97	1.49325e-95
AT3G27660	OLE3	-	3:10243755-10245023	10243755	10245023	1269	874	2.82096	7.17586e-41	1.0797e-39
AT4G29890	AT4G29890	-	4:14608833-14610998	14608833	14610998	2166	1397	2.81908	9.69368e-72	4.60913e-70
AT1G03120	ATRAB28	-	1:752271-753140	752271	753140	870	549	2.81847	1.20018e-106	1.79783e-104
AT3G25495	AT3G25495	-	3:9244325-9250768	9244325	9250768	6444	6444	2.80861	3.52393e-87	2.924e-85
AT4G36670	AT4G36670	-	4:17287499-17289590	17287499	17289590	2092	1770	2.80003	3.43645e-22	2.12761e-21
AT1G70800	AT1G70800	-	1:26702705-26703790	26702705	26703790	1086	717	2.79782	4.31439e-65	1.58416e-63
AT3G21781	AT3G21781	-	3:7676054-7676384	7676054	7676384	331	331	2.79754	2.07757e-09	5.58295e-09
AT1G28330	DRM1	-	1:9933884-9935271	9933884	9935271	1388	1070	2.79424	5.92456e-65	2.16132e-63
AT5G30500	AT5G30500	-	5:11615345-11616926	11615345	11616926	1582	987	2.78386	8.44229e-32	8.59823e-31
AT5G40382	AT5G40382	-	5:16155086-16155683	16155086	16155683	598	475	2.77773	5.13053e-19	2.64528e-18
AT5G65550	AT5G65550	-	5:26198304-26199827	26198304	26199827	1524	1524	2.77285	2.28909e-97	2.74805e-95
AT3G16120	AT3G16120	-	3:5464769-5465531	5464769	5465531	763	684	2.77124	1.4918e-57	4.09265e-56
AT5G16460	AT5G16460	-	5:5376961-5378533	5376961	5378533	1573	1231	2.7707	4.19327e-101	5.37723e-99
AT4G18197	ATPUP7	-	4:10071634-10073236	10071634	10073236	1603	1521	2.76841	1.26405e-22	8.04988e-22
AT3G12960	AT3G12960	-	3:4136488-4136828	4136488	4136828	341	341	2.76685	1.61339e-48	3.29829e-47
AT5G57660	COL5	-	5:23355464-23356989	23355464	23356989	1526	1437	2.76662	2.12961e-44	3.67835e-43
AT4G37390	YDK1	-	4:17579657-17582022	17579657	17582022	2366	2131	2.76625	9.67055e-58	2.67911e-56
AT4G28240	AT4G28240	AT4G28230	4:13997292-13998347	13997292	13998347	1056	1056	2.76433	4.0259e-67	1.60345e-65
AT1G22770	GI	-	1:8061844-8067716	8061844	8067716	5873	4136	2.76357	1.87472e-43	3.11417e-42
AT5G64210	AOX2	-	5:25683965-25685664	25683965	25685664	1700	1062	2.76252	2.51147e-95	2.74269e-93
AT1G14960	AT1G14960	-	1:5159199-5160083	5159199	5160083	885	688	2.75595	1.14293e-29	1.04013e-28
AT5G47220	ERF2	-	5:19171862-19172823	19171862	19172823	962	962	2.74863	2.68622e-20	1.50164e-19
AT5G09640	SNG2	-	5:2988314-2991156	2988314	2991156	2843	1647	2.74662	9.02683e-74	4.64429e-72
AT3G15400	ATA20	-	3:5201644-5203197	5201644	5203197	1554	1554	2.74255	1.2225e-68	5.21241e-67
AT1G31480	SGR2	-	1:11265880-11271701	11265880	11271701	5822	3138	2.74195	4.20058e-95	4.52887e-93
AT2G20770	GCL2	-	2:8945318-8947310	8945318	8947310	1993	1549	2.74139	7.65209e-133	2.35504e-130
AT5G57790	AT5G57790	-	5:23412025-23413627	23412025	23413627	1603	1407	2.73843	1.58352e-101	2.06186e-99
AT4G27170	SESA4	-	4:13613596-13614283	13613596	13614283	688	688	2.73831	1.93471e-53	4.6851e-52
AT3G15450	AT3G15450	-	3:5212984-5214124	5212984	5214124	1141	1051	2.73195	2.30683e-95	2.55214e-93
AT3G03620	AT3G03620	-	3:873749-876800	873749	876800	3052	1738	2.72936	8.56744e-68	3.49448e-66
AT1G30110	NUDX25	-	1:10581735-10584080	10581735	10584080	2346	999	2.72817	7.49763e-36	9.11072e-35
AT3G51430	SSL5	-	3:19086452-19088110	19086452	19088110	1659	1413	2.72301	1.76761e-103	2.45248e-101
AT2G23640	RTNLB13	-	2:10057554-10059108	10057554	10059108	1555	687	2.72178	2.32522e-87	1.93886e-85
AT3G10200	AT3G10200	-	3:3157608-3160188	3157608	3160188	2581	1958	2.72176	4.95947e-92	4.88075e-90
AT3G14595	AT3G14595	-	3:4908948-4910476	4908948	4910476	1529	738	2.72155	6.85029e-72	3.28484e-70
AT1G16510	AT1G16510	-	1:5644572-5645443	5644572	5645443	872	872	2.71675	3.42449e-25	2.52356e-24
AT4G26466	LRE	-	4:13367645-13368629	13367645	13368629	985	498	2.71568	7.21376e-12	2.33252e-11
AT5G15780	AT5G15780	-	5:5144727-5146403	5144727	5146403	1677	1483	2.71446	4.04642e-49	8.45602e-48
AT5G42290	AT5G42290	-	5:16911637-16912161	16911637	16912161	525	525	2.70987	3.74558e-70	1.68621e-68
AT5G07500	PEI1	-	5:2372619-2373655	2372619	2373655	1037	1037	2.70837	1.98518e-15	8.22395e-15
AT4G24220	AWI31	-	4:12564945-12566755	12564945	12566755	1811	1722	2.70804	1.53224e-74	8.13048e-73
AT5G66400	RAB18	-	5:26518277-26519242	26518277	26519242	966	884	2.70155	2.5097e-39	3.54606e-38
AT3G22490	AT3G22490	-	3:7969681-7970843	7969681	7970843	1163	998	2.7006	3.29428e-56	8.71285e-55
AT2G26355	AT2G26355	-	2:11220708-11221535	11220708	11221535	828	828	2.69814	5.29804e-53	1.26667e-51
AT3G60690	AT3G60690	-	3:22435121-22435949	22435121	22435949	829	829	2.69811	1.98646e-38	2.70514e-37
AT5G66080	AT5G66080	-	5:26423419-26425406	26423419	26425406	1988	1691	2.69774	4.89342e-66	1.8572e-64
AT1G17820	AT1G17820	-	1:6131537-6135345	6131537	6135345	3809	2856	2.6972	2.06085e-59	6.15237e-58
AT1G50290	AT1G50290	-	1:18627559-18628434	18627559	18628434	876	876	2.69616	8.38809e-37	1.06197e-35
AT5G66590	AT5G66590	-	5:26574181-26574874	26574181	26574874	694	694	2.69587	1.42388e-68	6.05579e-67
AT3G24927	AT3G24927	-	3:9103087-9103989	9103087	9103989	903	903	2.6945	4.94881e-60	1.51207e-58
AT4G15396	CYP702A6	-	4:8807527-8810512	8807527	8810512	2986	1568	2.69255	1.92975e-96	2.23732e-94
AT5G07070	CIPK2	-	5:2196434-2198114	2196434	2198114	1681	1681	2.68846	1.62913e-24	1.16208e-23
AT2G25095	MIR156A	-	2:10676472-10676553	10676472	10676553	82	82	2.68495	8.3976e-20	4.54868e-19
AT4G10490	AT4G10490	-	4:6483867-6485360	6483867	6485360	1494	1261	2.68384	5.18024e-27	4.14787e-26
AT1G18330	EPR1	-	1:6305966-6308013	6305966	6308013	2048	1644	2.67479	1.60972e-124	4.27144e-122
AT5G47610	AT5G47610	-	5:19301188-19301913	19301188	19301913	726	726	2.67321	2.3016e-16	1.00696e-15
AT1G80090	AT1G80090	-	1:30130104-30131940	30130104	30131940	1837	1294	2.67284	1.09871e-87	9.39285e-86
AT1G28930	AT1G28930	-	1:10106090-10106161	10106090	10106161	72	72	2.66445	6.63229e-06	1.32858e-05
AT4G24652	AT4G24652	-	4:12722395-12722952	12722395	12722952	558	360	2.66277	5.33284e-10	1.50876e-09
AT3G21600	AT3G21600	-	3:7606507-7608407	7606507	7608407	1901	1400	2.66239	6.68329e-39	9.25761e-38
AT1G28360	ERF12	-	1:9951848-9952740	9951848	9952740	893	893	2.66237	1.9693e-35	2.35246e-34
AT2G37390	NAKR2	-	2:15694200-15695825	15694200	15695825	1626	1244	2.66168	4.37082e-21	2.55473e-20
AT1G80570	AT1G80570	-	1:30290325-30292420	30290325	30292420	2096	2096	2.66043	2.79652e-109	4.64086e-107
AT1G22500	AT1G22500	-	1:7949476-7950900	7949476	7950900	1425	1425	2.65875	3.48529e-31	3.42798e-30
AT2G41710	AT2G41710	-	2:17400022-17403050	17400022	17403050	3029	1791	2.65301	3.36233e-96	3.87171e-94
AT4G15490	UGT84A3	-	4:8852698-8854545	8852698	8854545	1848	1848	2.65234	2.33922e-21	1.39031e-20
AT3G20810	JMJD5	-	3:7275674-7278379	7275674	7278379	2706	1665	2.65224	6.78016e-110	1.14768e-107
AT3G57020	AT3G57020	-	3:21098315-21100360	21098315	21100360	2046	1370	2.6469	2.16795e-56	5.7609e-55
AT2G44995	AT2G44995	-	2:18562102-18563678	18562102	18563678	1577	621	2.64106	8.98763e-11	2.69263e-10
AT2G36220	AT2G36220	-	2:15192480-15193698	15192480	15193698	1219	1219	2.63984	5.09657e-63	1.74282e-61
AT1G21410	SKP2A	-	1:7497141-7499579	7497141	7499579	2439	1408	2.63815	4.05203e-99	4.9702e-97
AT1G73066	AT1G73066	-	1:27481785-27483715	27481785	27483715	1931	1931	2.63522	1.53924e-18	7.67446e-18
AT1G07430	HAI2	-	1:2280835-2282828	2280835	2282828	1994	1817	2.62514	3.56237e-94	3.6994e-92
AT1G19610	LCR78	-	1:6781483-6782039	6781483	6782039	557	443	2.62455	7.88091e-12	2.54192e-11
AT1G29355	AT1G29355	-	1:10274048-10275539	10274048	10275539	1492	924	2.62256	6.11956e-83	4.35235e-81
AT4G27970	SLAH2	-	4:13918290-13920132	13918290	13920132	1843	1570	2.62217	8.16333e-34	8.99614e-33
AT1G69252	AT1G69252	-	1:26036570-26037659	26036570	26037659	1090	981	2.61881	1.08306e-94	1.15637e-92
AT2G45510	CYP704A2	-	2:18753074-18755172	18753074	18755172	2099	1775	2.61695	5.61757e-74	2.94392e-72
AT1G15175	AT1G15175	-	1:5222913-5224121	5222913	5224121	1209	829	2.61028	1.83775e-28	1.59036e-27
AT4G12680	AT4G12680	-	4:7475104-7478356	7475104	7478356	3253	1910	2.60659	9.78826e-90	8.95599e-88
AT3G15780	AT3G15780	-	3:5341426-5342557	5341426	5342557	1132	568	2.60493	5.10665e-51	1.14037e-49
AT4G18920	AT4G18920	-	4:10368755-10370212	10368755	10370212	1458	899	2.59809	1.59102e-83	1.17092e-81
AT1G01520	AT1G01520	-	1:190596-192139	190596	192139	1544	864	2.59659	1.02319e-53	2.51736e-52
AT1G69890	AT1G69890	-	1:26323111-26324616	26323111	26324616	1506	1244	2.59427	1.14129e-50	2.52202e-49
AT2G21490	LEA	-	2:9206016-9207125	9206016	9207125	1110	836	2.59192	1.10722e-49	2.3545e-48
AT2G38800	AT2G38800	-	2:16216999-16219159	16216999	16219159	2161	2078	2.5886	1.14937e-73	5.86004e-72
AT3G53040	AT3G53040	-	3:19664674-19666487	19664674	19666487	1814	1645	2.58694	3.41845e-67	1.36472e-65
AT2G36540	AT2G36540	-	2:15325237-15326449	15325237	15326449	1213	750	2.58533	3.47868e-24	2.42919e-23
AT3G51440	AT3G51440	-	3:19089081-19090639	19089081	19090639	1559	1251	2.58459	1.33998e-37	1.75692e-36
AT5G05965	AT5G05965	-	5:1790788-1792634	1790788	1792634	1847	806	2.57299	1.45096e-87	1.22802e-85
AT3G51860	CAX3	-	3:19239427-19242913	19239427	19242913	3487	1805	2.57235	9.22749e-96	1.04129e-93
AT1G29357	AT1G29357	-	1:10274102-10275718	10274102	10275718	1617	1543	2.56892	2.83385e-82	1.98217e-80
AT1G29670	AT1G29670	-	1:10375763-10377871	10375763	10377871	2109	1326	2.56788	5.53685e-19	2.84784e-18
AT3G03590	AT3G03590	-	3:865183-867008	865183	867008	1826	929	2.56786	4.87965e-40	7.12664e-39
AT1G01470	LEA14	-	1:172146-172948	172146	172948	803	727	2.56666	9.35484e-58	2.59589e-56
AT1G33612	AT1G33612	-	1:12191312-12192849	12191312	12192849	1538	1538	2.55982	7.97377e-43	1.2916e-41
AT5G58350	WNK4	AT5G58340	5:23584789-23587801	23584789	23587801	3013	2552	2.55966	9.85555e-65	3.55704e-63
AT4G25707	AT4G25707	-	4:13097640-13097762	13097640	13097762	123	123	2.55864	1.08765e-38	1.49681e-37
AT4G31351	AT4G31351	-	4:15217687-15217884	15217687	15217884	198	198	2.55861	5.70402e-13	1.99487e-12
AT1G19397	AT1G19397	AT1G19396	1:6710961-6711787	6710961	6711787	827	747	2.55588	7.98333e-47	1.53039e-45
AT5G63030	AT5G63030	-	5:25286223-25287694	25286223	25287694	1472	684	2.55496	1.09588e-60	3.44155e-59
AT5G61520	AT5G61520	-	5:24739026-24741273	24739026	24741273	2248	2173	2.55355	4.40598e-24	3.04782e-23
AT4G29820	CFIM-25	-	4:14595680-14597481	14595680	14597481	1802	1200	2.55352	5.01303e-77	2.92605e-75
AT1G15800	AT1G15800	-	1:5441082-5443684	5441082	5443684	2603	1067	2.55	1.67046e-66	6.39727e-65
AT3G22750	AT3G22750	-	3:8037216-8039903	8037216	8039903	2688	2092	2.54248	1.02036e-60	3.21632e-59
AT1G67365	AT1G67365	-	1:25238410-25239235	25238410	25239235	826	826	2.536	2.16018e-48	4.3896e-47
AT1G17430	AT1G17430	-	1:5982267-5984013	5982267	5984013	1747	1136	2.53591	6.66942e-39	9.24597e-38
AT1G77100	AT1G77100	-	1:28965772-28967066	28965772	28967066	1295	1011	2.53256	1.04697e-18	5.26501e-18
AT1G26440	ATUPS5	-	1:9143967-9146050	9143967	9146050	2084	1761	2.53022	2.5503e-77	1.49892e-75
AT1G08165	AT1G08165	-	1:2561627-2562148	2561627	2562148	522	430	2.52948	6.33212e-11	1.92051e-10
AT3G52565	AT3G52565	-	3:19500988-19501067	19500988	19501067	80	80	2.52933	1.23252e-05	2.41022e-05
AT5G39120	AT5G39120	-	5:15662705-15663486	15662705	15663486	782	666	2.52835	0.00170127	0.00266815
AT1G50420	SCL-3	-	1:18677926-18680117	18677926	18680117	2192	1951	2.52406	3.56369e-116	7.09677e-114
AT3G52160	KCS15	-	3:19344972-19346615	19344972	19346615	1644	1477	2.52364	7.19172e-23	4.64635e-22
AT2G04240	XERICO	-	2:1461630-1462937	1461630	1462937	1308	1308	2.51737	5.68524e-88	4.96052e-86
AT3G62100	IAA30	-	3:22995791-22996761	22995791	22996761	971	731	2.51721	2.7023e-35	3.21446e-34
AT2G41210	PIP5K5	-	2:17173413-17176807	17173413	17176807	3395	2765	2.51683	3.00467e-84	2.26045e-82
AT1G14760	KNATM	-	1:5084352-5085213	5084352	5085213	862	733	2.51585	5.24593e-25	3.84074e-24
AT1G33660	AT1G33660	-	1:12197701-12198322	12197701	12198322	622	312	2.51283	7.7794e-06	1.54975e-05
AT5G06570	AT5G06570	-	5:2007600-2011041	2007600	2011041	3442	1377	2.51266	6.93415e-40	1.00664e-38
AT5G26010	AT5G26010	-	5:9085393-9087372	9085393	9087372	1980	1115	2.51135	4.43683e-11	1.35956e-10
AT3G10113	AT3G10113	-	3:3118043-3119391	3118043	3119391	1349	1011	2.5073	3.02417e-61	9.73196e-60
AT1G43650	AT1G43650	-	1:16443685-16446886	16443685	16446886	3202	1446	2.50535	2.43365e-15	1.00303e-14
AT3G07360	ATPUB9	-	3:2354719-2356854	2354719	2356854	2136	1789	2.50477	1.42635e-78	8.81159e-77
AT3G03310	ATLCAT3	-	3:778568-781580	778568	781580	3013	1635	2.50222	1.75085e-92	1.75365e-90
AT5G07480	KUOX1	-	5:2367167-2369554	2367167	2369554	2388	1023	2.50188	2.10094e-14	8.11006e-14
AT2G07667	AT2G07667	-	2:3364417-3366557	3364417	3366557	2141	1116	2.49695	8.66998e-10	2.40782e-09
AT5G01950	AT5G01950	-	5:364902-370186	364902	370186	5285	3387	2.49652	2.59674e-88	2.28932e-86
AT4G02280	SUS3	-	4:994927-998967	994927	998967	4041	2917	2.49471	2.86537e-85	2.23512e-83
AT1G08170	AT1G08170	-	1:2562941-2563672	2562941	2563672	732	732	2.49293	1.49344e-41	2.30442e-40
AT5G48160	OBE2	-	5:19527833-19530316	19527833	19530316	2484	2091	2.49229	1.82999e-78	1.12233e-76
AT1G14530	THH1	-	1:4970858-4973726	4970858	4973726	2869	1573	2.49174	1.479e-90	1.39861e-88
AT4G31354	AT4G31354	-	4:15219148-15219345	15219148	15219345	198	198	2.48911	4.32172e-12	1.41798e-11
AT1G09250	AT1G09250	-	1:2989378-2990357	2989378	2990357	980	980	2.48507	2.08994e-67	8.3632e-66
AT1G60750	AT1G60750	-	1:22362293-22363854	22362293	22363854	1562	993	2.4849	2.9356e-24	2.05674e-23
AT2G43930	AT2G43930	-	2:18193151-18195582	18193151	18195582	2432	652	2.4844	7.03222e-68	2.88918e-66
AT2G02120	LCR70	-	2:538250-539055	538250	539055	806	516	2.48377	3.67053e-46	6.78287e-45
AT2G31981	AT2G31981	-	2:13609981-13610094	13609981	13610094	114	114	2.48301	8.65863e-05	0.000156386
AT3G48020	AT3G48020	-	3:17724590-17725198	17724590	17725198	609	609	2.48225	3.97095e-06	8.13757e-06
AT5G59800	MBD7	-	5:24094474-24096532	24094474	24096532	2059	1309	2.48197	3.31089e-46	6.12497e-45
AT3G09600	AT3G09600	-	3:2946406-2948995	2946406	2948995	2590	1424	2.47301	2.92557e-83	2.12537e-81
AT2G38465	AT2G38465	-	2:16106263-16106913	16106263	16106913	651	488	2.4724	2.89953e-65	1.07632e-63
AT5G35375	AT5G35375	-	5:13592255-13593149	13592255	13593149	895	479	2.46923	3.0604e-21	1.805e-20
AT2G19930	AT2G19930	-	2:8607340-8612441	8607340	8612441	5102	3127	2.46804	3.07682e-84	2.30449e-82
AT5G65165	SDH2-3	-	5:26034422-26035927	26034422	26035927	1506	1028	2.45951	5.93263e-87	4.87484e-85
AT2G34360	AT2G34360	-	2:14507294-14510231	14507294	14510231	2938	1443	2.4594	5.69371e-22	3.48184e-21
AT1G19396	AT1G19396	AT1G19394;AT1G19397	1:6709778-6711788	6709778	6711788	2011	707	2.45889	2.37744e-49	5.00535e-48
AT3G48115	AT3G48115	-	3:17771170-17772926	17771170	17772926	1757	954	2.45834	1.08327e-67	4.37625e-66
AT2G21780	AT2G21780	-	2:9291036-9291669	9291036	9291669	634	634	2.45165	1.81687e-16	8.00058e-16
AT1G52820	AT1G52820	-	1:19669183-19670427	19669183	19670427	1245	1093	2.45142	1.01248e-27	8.4342e-27
AT5G50170	AT5G50170	-	5:20421073-20425586	20421073	20425586	4514	3223	2.45028	2.63602e-76	1.49731e-74
AT3G61040	CYP76C7	-	3:22593973-22596125	22593973	22596125	2153	1742	2.44954	8.84667e-12	2.848e-11
AT4G39070	AT4G39070	-	4:18204855-18206509	18204855	18206509	1655	1023	2.44898	3.7967e-14	1.44064e-13
AT1G14940	AT1G14940	-	1:5154537-5155564	5154537	5155564	1028	758	2.44547	5.51842e-61	1.75914e-59
AT5G46050	ATPTR3	-	5:18675035-18679146	18675035	18679146	4112	1851	2.44122	3.5949e-24	2.50828e-23
AT4G04078	AT4G04078	-	4:1961640-1961747	1961640	1961747	108	108	2.43855	6.14246e-07	1.35312e-06
AT1G47540	AT1G47540	-	1:17455533-17456170	17455533	17456170	638	493	2.438	5.48143e-42	8.63109e-41
AT4G01410	AT4G01410	-	4:578165-579169	578165	579169	1005	1005	2.43702	1.49068e-80	9.97338e-79
AT4G28390	AAC3	-	4:14041288-14043278	14041288	14043278	1991	1444	2.43675	1.51973e-86	1.22497e-84
AT1G30500	NF-YA7	-	1:10804450-10806319	10804450	10806319	1870	970	2.43335	5.0202e-101	6.38924e-99
AT4G31355	AT4G31355	-	4:15219697-15219822	15219697	15219822	126	126	2.43083	1.23847e-08	3.13827e-08
AT2G42950	AT2G42950	-	2:17863819-17866487	17863819	17866487	2669	1826	2.42682	5.67076e-67	2.23751e-65
AT4G27160	AT2S3	-	4:13611796-13612563	13611796	13612563	768	768	2.42576	1.04015e-28	9.07092e-28
AT5G20960	AO1	-	5:7116738-7122774	7116738	7122774	6037	4585	2.42428	5.59646e-69	2.41661e-67
AT4G20820	AT4G20820	-	4:11150160-11151758	11150160	11151758	1599	1599	2.42421	7.68036e-11	2.31409e-10
AT4G11910	AT4G11910	-	4:7156252-7158042	7156252	7158042	1791	1202	2.42319	4.08832e-79	2.5822e-77
AT5G02020	SIS	-	5:386018-388123	386018	388123	2106	1420	2.42296	1.11399e-75	6.22328e-74
AT1G15125	AT1G15125	-	1:5204625-5205912	5204625	5205912	1288	1056	2.41934	1.23491e-26	9.74515e-26
AT1G15330	AT1G15330	-	1:5274346-5275602	5274346	5275602	1257	1184	2.41598	1.63128e-85	1.27836e-83
AT3G50980	XERO1	-	3:18941925-18942865	18941925	18942865	941	640	2.41479	9.92049e-47	1.89104e-45
AT1G46554	AT1G46554	-	1:17252952-17253903	17252952	17253903	952	952	2.41454	7.88833e-63	2.68664e-61
AT1G03580	AT1G03580	-	1:892847-894052	892847	894052	1206	1206	2.40858	2.8698e-34	3.23416e-33
AT4G10030	AT4G10030	-	4:6270241-6273241	6270241	6273241	3001	1535	2.40426	1.2056e-39	1.72796e-38
AT1G01250	AT1G01250	-	1:104491-105330	104491	105330	840	840	2.40339	7.07738e-25	5.14158e-24
AT1G69790	AT1G69790	-	1:26266609-26269013	26266609	26269013	2405	1588	2.3984	6.30641e-22	3.84541e-21
AT4G35295	AT4G35295	-	4:16795333-16796223	16795333	16796223	891	336	2.39299	9.95715e-13	3.41945e-12
AT2G15030	AT2G15030	-	2:6504367-6506172	6504367	6506172	1806	1806	2.39233	2.40418e-15	9.91364e-15
AT3G50810	AT3G50810	-	3:18888868-18890101	18888868	18890101	1234	736	2.39113	1.05021e-12	3.59856e-12
AT1G51090	AT1G51090	-	1:18932937-18933950	18932937	18933950	1014	767	2.389	6.97489e-27	5.57168e-26
AT1G15405	AT1G15405	-	1:5297875-5298166	5297875	5298166	292	292	2.38497	7.0169e-09	1.81308e-08
AT1G02700	AT1G02700	-	1:588329-589480	588329	589480	1152	1030	2.3824	4.28067e-68	1.77595e-66
AT1G19540	AT1G19540	-	1:6765667-6767341	6765667	6767341	1675	1073	2.38213	2.28178e-63	7.86633e-62
AT1G50040	AT1G50040	-	1:18542130-18543948	18542130	18543948	1819	1614	2.3819	8.30897e-17	3.73165e-16
AT1G15380	AT1G15380	-	1:5290745-5292535	5290745	5292535	1791	983	2.38174	1.59097e-22	1.00562e-21
AT5G41761	AT5G41761	-	5:16711437-16712031	16711437	16712031	595	595	2.38001	4.57383e-09	1.19773e-08
AT2G46670	AT2G46670	-	2:19164414-19165233	19164414	19165233	820	727	2.37967	1.04894e-10	3.12871e-10
AT1G67920	AT1G67920	-	1:25473544-25474140	25473544	25474140	597	597	2.37208	4.84104e-39	6.77225e-38
AT5G49990	AT5G49990	-	5:20337641-20341881	20337641	20341881	4241	1935	2.37091	5.89721e-76	3.31635e-74
AT3G01520	AT3G01520	-	3:208439-210137	208439	210137	1699	811	2.36718	1.38164e-86	1.11899e-84
AT3G17520	AT3G17520	-	3:5999289-6000370	5999289	6000370	1082	1082	2.3663	1.52552e-76	8.72384e-75
AT3G20660		-	3:7225135-7228595	7225135	7228595	3461	1802	2.36387	2.10647e-73	1.06436e-71
AT5G02840	LCL1	-	5:648704-651972	648704	651972	3269	1623	2.36145	1.09355e-102	1.48084e-100
AT1G19530	AT1G19530	-	1:6763915-6764971	6763915	6764971	1057	700	2.35529	5.70388e-67	2.24534e-65
AT5G60310	AT5G60310	AT5G60300	5:24268011-24269982	24268011	24269982	1972	1851	2.35141	1.97875e-45	3.56322e-44
AT5G66607	AT5G66607	-	5:26583431-26583544	26583431	26583544	114	114	2.35005	0.000105078	0.000188039
AT1G72100	AT1G72100	-	1:27127212-27128978	27127212	27128978	1767	1648	2.34853	2.65745e-73	1.33877e-71
AT2G38905	AT2G38905	-	2:16244099-16244503	16244099	16244503	405	315	2.34434	9.25619e-39	1.27693e-37
AT2G43520	ATTI2	-	2:18068425-18069168	18068425	18069168	744	590	2.34343	2.15796e-10	6.29573e-10
AT5G60760	AT5G60760	-	5:24438271-24442287	24438271	24442287	4017	2598	2.34316	2.93742e-80	1.9347e-78
AT2G36970	AT2G36970	-	2:15529006-15530749	15529006	15530749	1744	1554	2.3413	6.30518e-71	2.92405e-69
AT3G07500	AT3G07500	-	3:2392287-2393778	2392287	2393778	1492	823	2.33935	4.33159e-70	1.94485e-68
AT5G24735	AT5G24735	-	5:8468331-8469262	8468331	8469262	932	585	2.33682	4.21683e-44	7.19539e-43
AT4G31270	AT4G31270	-	4:15183188-15184961	15183188	15184961	1774	1080	2.3366	1.42674e-59	4.29722e-58
AT1G01240	AT1G01240	-	1:99894-101834	99894	101834	1941	1941	2.33457	1.77218e-75	9.80319e-74
AT3G17668	ENA	-	3:6039603-6040489	6039603	6040489	887	610	2.33436	1.18167e-68	5.05104e-67
AT5G20480	EFR	-	5:6922480-6925887	6922480	6925887	3408	3321	2.33412	1.10217e-20	6.30284e-20
AT5G58650	PSY1	-	5:23699708-23700226	23699708	23700226	519	439	2.33351	1.45043e-52	3.40048e-51
AT5G64260	EXL2	-	5:25703929-25705316	25703929	25705316	1388	1388	2.33058	4.10723e-53	9.86142e-52
ATCG00020	PSBA	-	Pt:383-1444	383	1444	1062	1062	2.32843	0.0016892	0.00265095
AT3G26740	CCL	-	3:9827801-9828680	9827801	9828680	880	712	2.32825	2.6873e-36	3.31545e-35
AT5G62490	ATHVA22B	-	5:25090130-25091559	25090130	25091559	1430	794	2.32647	2.22071e-65	8.27974e-64
AT4G11911	AT4G11911	-	4:7158150-7159440	7158150	7159440	1291	822	2.32336	6.44752e-12	2.09195e-11
AT5G56140	AT5G56140	-	5:22725369-22728343	22725369	22728343	2975	1452	2.32285	7.00148e-77	4.04485e-75
AT1G26665	AT1G26665	-	1:9214174-9215552	9214174	9215552	1379	798	2.32152	2.23623e-75	1.22105e-73
AT3G26470	AT3G26470	-	3:9686098-9687642	9686098	9687642	1545	1454	2.32128	2.71037e-35	3.2218e-34
AT3G02875	ILR1	-	3:631913-634074	631913	634074	2162	1624	2.32109	2.11274e-75	1.15736e-73
AT5G04750	AT5G04750	-	5:1372147-1373619	1372147	1373619	1473	598	2.32001	1.06477e-69	4.7555e-68
AT3G27440	UKL5	-	3:10155555-10157931	10155555	10157931	2377	1398	2.31899	4.59034e-34	5.13215e-33
AT5G52300	RD29B	-	5:21237056-21239529	21237056	21239529	2474	2134	2.3156	2.91455e-68	1.21514e-66
AT2G05380	GRP3S	-	2:1966816-1968037	1966816	1968037	1222	603	2.31452	4.28434e-11	1.31498e-10
AT1G01720	ATAF1	-	1:268330-269819	268330	269819	1490	1316	2.31427	6.29002e-49	1.30639e-47
AT3G23260	AT3G23260	-	3:8313334-8314422	8313334	8314422	1089	1089	2.31304	1.67127e-32	1.74627e-31
AT3G11050	ATFER2	-	3:3463598-3465506	3463598	3465506	1909	1027	2.30988	2.76545e-75	1.50517e-73
AT1G04560	AT1G04560	-	1:1244947-1246059	1244947	1246059	1113	855	2.30655	2.9821e-65	1.10455e-63
AT1G19660	AT1G19660	-	1:6799981-6802685	6799981	6802685	2705	1490	2.3061	9.36968e-88	8.05079e-86
AT4G14504	MIR852A	-	4:8336207-8336331	8336207	8336331	125	125	2.30529	3.96005e-05	7.40192e-05
AT3G12490	CYSB	-	3:3960401-3961915	3960401	3961915	1515	866	2.30485	3.86357e-72	1.87927e-70
AT1G19394	AT1G19394	AT1G19396	1:6709773-6710670	6709773	6710670	898	284	2.30377	2.14669e-25	1.59653e-24
AT3G26165	CYP71B18	-	3:9570418-9571979	9570418	9571979	1562	1424	2.30282	1.82698e-69	8.03255e-68
AT4G13395	DVL10	-	4:7785687-7786113	7785687	7786113	427	427	2.30276	2.08342e-07	4.78184e-07
AT4G39130	AT4G39130	-	4:18228118-18228852	18228118	18228852	735	529	2.29727	5.36166e-56	1.40708e-54
AT3G48530	KING1	-	3:17987378-17989763	17987378	17989763	2386	1627	2.29662	1.73598e-79	1.1047e-77
AT3G03520	NPC3	-	3:837877-840624	837877	840624	2748	1780	2.29567	1.42787e-43	2.39029e-42
AT5G40760	G6PD6	-	5:16310748-16314774	16310748	16314774	4027	1959	2.29434	1.79224e-84	1.35434e-82
AT5G45830	DOG1	-	5:18589482-18591400	18589482	18591400	1919	1063	2.29386	2.89863e-10	8.37288e-10
AT2G25964	AT2G25964	-	2:11070639-11071287	11070639	11071287	649	649	2.29293	8.18739e-68	3.34753e-66
AT1G19550	AT1G19550	-	1:6767451-6767983	6767451	6767983	533	462	2.28805	1.81953e-11	5.71412e-11
AT5G14500	AT5G14500	-	5:4674233-4676765	4674233	4676765	2533	1329	2.28797	2.79085e-20	1.55858e-19
AT4G18360	AT4G18360	-	4:10145919-10148682	10145919	10148682	2764	1704	2.28775	2.46536e-78	1.50654e-76
AT3G26350	AT3G26350	-	3:9653660-9654730	9653660	9654730	1071	1071	2.28676	3.00795e-17	1.38924e-16
AT4G02000	AT4G02000	-	4:874880-875903	874880	875903	1024	1024	2.28589	4.66122e-10	1.32383e-09
AT3G44798	AT3G44798	-	3:16342295-16343014	16342295	16343014	720	720	2.28526	2.45356e-45	4.40418e-44
AT5G06370	AT5G06370	-	5:1947139-1948612	1947139	1948612	1474	1120	2.28498	2.14481e-57	5.84624e-56
AT1G70580	GGT2	-	1:26612632-26616069	26612632	26616069	3438	2090	2.28389	1.70396e-77	1.01919e-75
AT3G47340	AT-ASN1	-	3:17437884-17441243	17437884	17441243	3360	2474	2.28252	5.23077e-70	2.34236e-68
AT3G22460	OASA2	-	3:7963537-7965907	7963537	7965907	2371	1157	2.28235	6.77742e-13	2.35229e-12
AT1G32710	AT1G32710	-	1:11833113-11833706	11833113	11833706	594	405	2.28137	3.48157e-32	3.59126e-31
AT5G54960	PDC2	-	5:22310687-22312761	22310687	22312761	2075	2075	2.27974	2.08264e-82	1.46277e-80
AT2G32090	AT2G32090	-	2:13644395-13645829	13644395	13645829	1435	830	2.27868	7.27464e-64	2.54944e-62
AT1G11530	ATCXXS1	-	1:3874437-3875484	3874437	3875484	1048	611	2.27698	1.46333e-25	1.09776e-24
AT1G25422	AT1G25422	-	1:8918852-8919892	8918852	8919892	1041	1041	2.27622	1.23454e-11	3.93098e-11
AT1G05840	AT1G05840	-	1:1762734-1766281	1762734	1766281	3548	1698	2.27353	5.31194e-80	3.47163e-78
AT5G18130	AT5G18130	-	5:5995479-5997498	5995479	5997498	2020	2020	2.27347	3.74825e-47	7.29272e-46
AT3G26480	AT3G26480	-	3:9687273-9690827	9687273	9690827	3555	2295	2.27346	3.66357e-52	8.43717e-51
AT1G78895	AT1G78895	-	1:29658116-29659976	29658116	29659976	1861	802	2.27138	8.70803e-71	4.01637e-69
AT5G10340	AT5G10340	-	5:3253122-3255045	3253122	3255045	1924	1338	2.27069	1.10844e-08	2.82398e-08
AT5G67030	NPQ2	-	5:26753510-26757236	26753510	26757236	3727	2398	2.27065	4.29193e-62	1.42171e-60
AT2G07666	AT2G07666	-	2:3506000-3506320	3506000	3506320	321	321	2.26829	1.74111e-07	4.02399e-07
AT3G26220	CYP71B3	-	3:9596077-9597833	9596077	9597833	1757	1642	2.26673	5.3477e-10	1.51246e-09
AT4G05070	AT4G05070	-	4:2593595-2594119	2593595	2594119	525	525	2.26527	3.47274e-74	1.82556e-72
AT3G16910	ACN1	-	3:5773055-5775501	5773055	5775501	2447	1976	2.2648	1.87849e-61	6.09143e-60
AT3G20250	APUM5	-	3:7058902-7063240	7058902	7063240	4339	3213	2.26357	7.22336e-65	2.62381e-63
AT5G01530	LHCB4.1	-	5:208937-210445	208937	210445	1509	1222	2.26224	4.70735e-67	1.86607e-65
AT1G17060	SOB7	-	1:5832097-5835456	5832097	5835456	3360	1817	2.26207	1.60553e-48	3.28619e-47
AT3G05120	ATGID1A	-	3:1430471-1432778	1430471	1432778	2308	1740	2.25871	4.52552e-60	1.39026e-58
AT2G31990	AT2G31990	-	2:13611351-13613573	13611351	13613573	2223	1611	2.2579	5.05135e-33	5.398e-32
AT5G07380	AT5G07380	-	5:2332476-2336063	2332476	2336063	3588	2206	2.25655	1.51825e-38	2.07421e-37
AT1G46768	RAP2.1	-	1:17265701-17266536	17265701	17266536	836	836	2.25627	6.25291e-41	9.44183e-40
AT1G10210	ATMPK1	-	1:3349219-3351180	3349219	3351180	1962	1877	2.25472	2.56143e-42	4.07877e-41
AT1G06250	AT1G06250	-	1:1913256-1914895	1913256	1914895	1640	1400	2.25299	7.36937e-33	7.79147e-32
AT1G03270	AT1G03270	-	1:799191-802436	799191	802436	3246	1500	2.2521	2.69565e-51	6.07581e-50
AT5G43780	APS4	-	5:17589394-17591535	17589394	17591535	2142	1702	2.25125	4.32778e-33	4.63648e-32
AT3G41762	AT3G41762	-	3:14195741-14196603	14195741	14196603	863	560	2.2486	1.51147e-56	4.02908e-55
AT5G09540	AT5G09540	-	5:2962216-2963264	2962216	2963264	1049	1049	2.24689	6.68609e-17	3.01962e-16
AT1G07240	UGT71C5	-	1:2223691-2225452	2223691	2225452	1762	1762	2.24686	1.42906e-43	2.39029e-42
AT1G70790	AT1G70790	-	1:26700412-26702346	26700412	26702346	1935	1014	2.24271	2.92477e-46	5.44637e-45
AT1G56280	ATDI19	-	1:21072855-21074877	21072855	21074877	2023	1185	2.24209	4.8504e-60	1.48468e-58
AT1G60970	AT1G60970	-	1:22447848-22449526	22447848	22449526	1679	833	2.2398	1.28272e-37	1.68314e-36
AT5G61590	AT5G61590	-	5:24764438-24765324	24764438	24765324	887	887	2.23943	1.94398e-77	1.15459e-75
AT1G78390	ATNCED9	-	1:29490895-29492875	29490895	29492875	1981	1981	2.23761	7.96461e-25	5.77374e-24
AT4G18280	AT4G18280	-	4:10103996-10104733	10103996	10104733	738	738	2.23223	1.21839e-21	7.34197e-21
AT1G03905	AT1G03905	-	1:993400-995784	993400	995784	2385	1141	2.23108	5.37785e-46	9.8625e-45
AT5G07330	AT5G07330	-	5:2315980-2316874	2315980	2316874	895	815	2.22828	4.29167e-59	1.25901e-57
AT5G57550	XTH25	-	5:23304888-23306421	23304888	23306421	1534	1059	2.22776	4.51852e-27	3.63349e-26
AT4G24730	AT4G24730	-	4:12749278-12754096	12749278	12754096	4819	2944	2.22712	3.74438e-76	2.11977e-74
AT3G19660	AT3G19660	-	3:6825521-6826006	6825521	6826006	486	486	2.22595	3.02967e-29	2.71771e-28
AT1G01355	AT1G01355	-	1:138513-139568	138513	139568	1056	687	2.22518	3.50622e-09	9.26726e-09
AT3G25870	AT3G25870	-	3:9463316-9464283	9463316	9464283	968	968	2.22461	1.92499e-65	7.193e-64
AT1G01650	SPPL4	-	1:232841-237817	232841	237817	4977	2220	2.22416	1.41798e-99	1.76486e-97
AT2G17036	AT2G17036	-	2:7403856-7405219	7403856	7405219	1364	1287	2.22341	3.93844e-15	1.60178e-14
AT2G01008	AT2G01008	-	2:1025-2810	1025	2810	1786	1239	2.22253	3.17047e-46	5.87804e-45
AT4G29190	AT4G29190	-	4:14391938-14393373	14391938	14393373	1436	1436	2.22222	8.89076e-25	6.42039e-24
AT4G32445	MIR419	-	4:15660370-15660475	15660370	15660475	106	106	2.22217	0.000371123	0.000624826
AT1G65500	AT1G65500	-	1:24357867-24358616	24357867	24358616	750	522	2.22088	8.58506e-08	2.035e-07
ATMG00310	ORF154	-	Mt:90883-91347	90883	91347	465	465	2.22051	7.71685e-10	2.15336e-09
AT2G17520	IRE1A	-	2:7617210-7621109	7617210	7621109	3900	2915	2.21325	1.20587e-75	6.71438e-74
AT4G04077	AT4G04077	-	4:1961139-1961892	1961139	1961892	754	754	2.21304	7.75946e-10	2.16454e-09
AT5G10000	ATFD4	-	5:3126709-3127155	3126709	3127155	447	447	2.21233	7.10996e-22	4.32759e-21
AT1G55675	AT1G55675	-	1:20803704-20804573	20803704	20804573	870	870	2.21148	9.85045e-39	1.35781e-37
AT1G23120	AT1G23120	-	1:8198720-8199557	8198720	8199557	838	713	2.2112	4.52761e-17	2.06462e-16
AT1G13960	WRKY4	-	1:4776463-4779400	4776463	4779400	2938	2093	2.21085	1.55886e-75	8.65142e-74
AT2G02380	GSTZ2	-	2:626842-628676	626842	628676	1835	815	2.2099	3.48818e-10	1.00228e-09
AT4G28170	AT4G28170	-	4:13981635-13982837	13981635	13982837	1203	694	2.20941	2.31612e-12	7.75413e-12
AT4G27150	SESA2	-	4:13609341-13610075	13609341	13610075	735	735	2.20869	1.84283e-37	2.40321e-36
AT2G35300	LEA18	-	2:14862901-14863387	14862901	14863387	487	487	2.20575	2.18776e-36	2.70901e-35
AT1G77000	ATSKP2;2	-	1:28940147-28942623	28940147	28942623	2477	1715	2.2031	4.07893e-62	1.35646e-60
AT5G67480	BT4	-	5:26930939-26933093	26930939	26933093	2155	1786	2.20286	3.49404e-59	1.03217e-57
AT2G07701	AT2G07701	-	2:3371832-3372152	3371832	3372152	321	321	2.20074	1.3722e-07	3.20287e-07
ATMG00430	ORF106A	-	Mt:115431-115751	115431	115751	321	321	2.20074	1.36781e-07	3.19307e-07
ATMG01150	ORF106G	-	Mt:293976-294296	293976	294296	321	321	2.20074	1.36605e-07	3.18939e-07
AT1G78780	AT1G78780	-	1:29621340-29623156	29621340	29623156	1817	1100	2.20032	1.24966e-64	4.49108e-63
AT3G27025	AT3G27025	-	3:9969705-9971268	9969705	9971268	1564	1084	2.19944	2.55188e-08	6.30501e-08
AT5G14780	FDH	-	5:4776943-4779494	4776943	4779494	2552	1559	2.19941	6.0313e-68	2.49004e-66
AT1G74410	AT1G74410	-	1:27965551-27967926	27965551	27967926	2376	1089	2.19874	1.04088e-73	5.32293e-72
AT4G38810	AT4G38810	-	4:18115283-18119077	18115283	18119077	3795	1741	2.19652	6.21849e-66	2.34433e-64
AT4G27990	YLMG1-2	-	4:13923773-13924692	13923773	13924692	920	920	2.19292	9.50973e-68	3.86022e-66
AT4G35780	AT4G35780	-	4:16946521-16950594	16946521	16950594	4074	2110	2.19285	2.13056e-74	1.12349e-72
AT4G18530	AT4G18530	-	4:10217338-10220500	10217338	10220500	3163	1796	2.19238	2.20477e-38	2.9904e-37
AT3G23255	AT3G23255	-	3:8311722-8313125	8311722	8313125	1404	929	2.19127	1.16637e-53	2.85719e-52
AT5G03210	AT5G03210	-	5:762787-763321	762787	763321	535	535	2.18542	3.69209e-11	1.13774e-10
AT1G03790	SOM	-	1:954525-956097	954525	956097	1573	1573	2.18486	4.06939e-64	1.45016e-62
AT4G40070	AT4G40070	-	4:18576418-18577774	18576418	18577774	1357	1357	2.18399	1.01969e-09	2.81801e-09
AT5G54770	THI1	-	5:22246592-22248332	22246592	22248332	1741	1533	2.18177	6.88048e-69	2.95599e-67
AT4G27140	SESA1	-	4:13607329-13608031	13607329	13608031	703	703	2.18125	3.92467e-23	2.57392e-22
AT4G36360	BGAL3	-	4:17176342-17181261	17176342	17181261	4920	3187	2.17858	2.10739e-60	6.59366e-59
AT2G36640	ATECP63	-	2:15356834-15358612	15356834	15358612	1779	1592	2.17727	1.21081e-67	4.87987e-66
AT1G65090	AT1G65090	-	1:24180830-24183300	24180830	24183300	2471	1519	2.17697	6.75269e-61	2.14855e-59
AT1G21780	AT1G21780	-	1:7651882-7654014	7651882	7654014	2133	1723	2.1752	2.95998e-60	9.17648e-59
AT5G36160	AT5G36160	-	5:14233110-14235151	14233110	14235151	2042	1436	2.17512	6.91438e-65	2.51698e-63
AT1G14740	AT1G14740	-	1:5075213-5077791	5075213	5077791	2579	2498	2.17444	2.26646e-58	6.4478e-57
AT2G22080	AT2G22080	-	2:9386516-9388183	9386516	9388183	1668	888	2.17184	6.37741e-57	1.71895e-55
AT1G28970	AT1G28970	-	1:10107649-10107720	10107649	10107720	72	72	2.16911	0.000108486	0.000193789
AT4G15393	CYP702A5	-	4:8804120-8807203	8804120	8807203	3084	1629	2.1641	1.09119e-23	7.39119e-23
AT2G39210	AT2G39210	-	2:16366157-16368275	16366157	16368275	2119	1980	2.16387	1.58886e-11	5.01018e-11
AT5G17310	AtUGP2	-	5:5696645-5700922	5696645	5700922	4278	1894	2.16379	8.14367e-77	4.67281e-75
AT1G27590	AT1G27590	-	1:9592128-9594586	9592128	9594586	2459	1634	2.16327	1.27172e-10	3.76731e-10
AT1G66770	SWEET6	-	1:24906451-24907236	24906451	24907236	786	786	2.16116	1.08149e-12	3.70198e-12
ATMG00490	ORF107C	ATMG00500	Mt:130817-131140	130817	131140	324	324	2.15998	9.55403e-09	2.44476e-08
AT1G23070	AT1G23070	-	1:8173823-8175819	8173823	8175819	1997	1461	2.15966	4.22445e-75	2.28457e-73
AT1G20650	AT1G20650	-	1:7158244-7160526	7158244	7160526	2283	1828	2.15948	1.56149e-69	6.90115e-68
AT5G02810	PRR7	-	5:637897-641977	637897	641977	4081	2831	2.15832	1.58075e-67	6.34062e-66
AT5G54070	AT-HSFA9	-	5:21943983-21945651	21943983	21945651	1669	1512	2.15729	1.3894e-33	1.51732e-32
AT5G61820	AT5G61820	-	5:24834317-24836694	24834317	24836694	2378	1688	2.1536	1.70026e-73	8.61684e-72
AT1G48430	AT1G48430	-	1:17902636-17906806	17902636	17906806	4171	2137	2.15224	5.33757e-72	2.57405e-70
AT5G56100	AT5G56100	-	5:22717115-22717751	22717115	22717751	637	637	2.15177	1.5175e-31	1.52444e-30
AT5G07990	CYP75B1	-	5:2560394-2563109	2560394	2563109	2716	1835	2.15003	1.34165e-15	5.61574e-15
AT2G25590	AT2G25590	-	2:10890903-10893772	10890903	10893772	2870	1312	2.14929	3.41094e-26	2.64484e-25
AT4G02360	AT4G02360	-	4:1041142-1041733	1041142	1041733	592	592	2.14767	9.01794e-26	6.86361e-25
AT1G63420	AT1G63420	-	1:23515874-23518910	23515874	23518910	3037	1870	2.14724	8.05058e-42	1.26061e-40
AT5G54080	HGO	-	5:21945869-21948913	21945869	21948913	3045	2280	2.14712	3.44988e-47	6.72767e-46
AT3G21780	UGT71B6	-	3:7675004-7676494	7675004	7676494	1491	1491	2.14517	6.40351e-10	1.80263e-09
AT4G15563	AT4G15563	-	4:8890879-8892526	8890879	8892526	1648	993	2.14469	1.66906e-25	1.24734e-24
AT2G01023	AT2G01023	-	2:9648-9767	9648	9767	120	120	2.14449	3.19815e-10	9.20823e-10
AT2G22821	AT2G22821	-	2:9721236-9721937	9721236	9721937	702	702	2.14418	6.23386e-22	3.80391e-21
AT1G13360	AT1G13360	-	1:4576873-4577967	4576873	4577967	1095	1095	2.14207	4.84725e-46	8.90873e-45
AT4G26120	AT4G26120	-	4:13236448-13238487	13236448	13238487	2040	1803	2.13903	3.14138e-27	2.54788e-26
AT5G24470	PRR5	-	5:8355951-8358873	8355951	8358873	2923	2257	2.13875	2.25841e-18	1.11355e-17
AT2G47890	AT2G47890	-	2:19607996-19609645	19607996	19609645	1650	1500	2.13817	3.66072e-71	1.71648e-69
AT2G31980	AtCYS2	-	2:13609093-13609902	13609093	13609902	810	729	2.13675	1.19572e-53	2.92486e-52
AT1G22370	AtUGT85A5	-	1:7898013-7899879	7898013	7899879	1867	1766	2.13546	9.86618e-54	2.43093e-52
AT4G23493	AT4G23493	-	4:12256180-12257039	12256180	12257039	860	560	2.13517	8.94671e-11	2.68132e-10
AT5G07030	AT5G07030	-	5:2183360-2185972	2183360	2185972	2613	1863	2.13467	6.99134e-29	6.15405e-28
AT2G28720	AT2G28720	-	2:12326978-12327678	12326978	12327678	701	701	2.13464	4.76577e-86	3.76963e-84
AT4G33565	AT4G33565	-	4:16136749-16138201	16136749	16138201	1453	1453	2.13458	3.57359e-19	1.86353e-18
AT1G16730	UP6	-	1:5726368-5727312	5726368	5727312	945	858	2.1328	3.15435e-69	1.37612e-67
AT5G48780	AT5G48780	-	5:19777453-19779815	19777453	19779815	2363	2279	2.13112	4.62643e-17	2.10912e-16
AT2G44910	ATHB-4	-	2:18517887-18519525	18517887	18519525	1639	957	2.12917	2.60491e-20	1.46049e-19
AT3G61260	AT3G61260	-	3:22675238-22676788	22675238	22676788	1551	891	2.12776	2.92933e-50	6.35223e-49
AT1G56220	AT1G56220	-	1:21043348-21044738	21043348	21044738	1391	762	2.1273	4.22111e-57	1.14688e-55
AT5G55460	AT5G55460	-	5:22468687-22469304	22468687	22469304	618	512	2.12698	5.35483e-49	1.11627e-47
AT5G23050	AAE17	-	5:7731269-7735439	7731269	7735439	4171	2450	2.12693	1.56506e-79	1.00348e-77
AT2G21720	AT2G21720	-	2:9273696-9276802	9273696	9276802	3107	2205	2.12147	4.24099e-60	1.30522e-58
AT3G45638	AT3G45638	-	3:16755215-16756290	16755215	16756290	1076	1076	2.12007	1.41863e-26	1.11689e-25
AT4G04960	AT4G04960	-	4:2533056-2535386	2533056	2535386	2331	2331	2.11934	2.963e-45	5.29616e-44
AT5G52830	WRKY27	-	5:21410852-21412340	21410852	21412340	1489	1313	2.11902	1.04836e-09	2.89392e-09
AT2G46790	TL1	-	2:19232649-19235087	19232649	19235087	2439	1826	2.11718	6.92218e-11	2.09161e-10
AT3G48580	XTH11	-	3:18007165-18008488	18007165	18008488	1324	1054	2.11611	1.52558e-32	1.597e-31
AT2G22240	ATIPS2	-	2:9451605-9454094	9451605	9454094	2490	1985	2.1134	8.54436e-48	1.69754e-46
AT4G02430	SR34b	-	4:1068974-1072215	1068974	1072215	3242	1626	2.11299	1.21677e-63	4.23134e-62
AT1G74740	CPK30	-	1:28079946-28082644	28079946	28082644	2699	2047	2.11234	1.96937e-41	3.01679e-40
AT1G18940	AT1G18940	-	1:6543852-6545592	6543852	6545592	1741	1581	2.11222	1.57122e-13	5.71466e-13
AT1G74420	FUT3	-	1:27967771-27969879	27967771	27969879	2109	1908	2.11206	4.24185e-18	2.05854e-17
AT2G45290	AT2G45290	-	2:18672682-18675906	18672682	18675906	3225	2598	2.1109	1.77855e-63	6.14397e-62
AT2G15960	AT2G15960	-	2:6947309-6947688	6947309	6947688	380	380	2.11031	5.2771e-08	1.27154e-07
AT5G41590	AT5G41590	-	5:16632086-16633896	16632086	16633896	1811	801	2.10797	1.14671e-08	2.91752e-08
ATMG00320	ORF127	-	Mt:91001-91384	91001	91384	384	384	2.10533	6.79978e-09	1.75859e-08
AT5G15254	AT5G15254	-	5:4953095-4953274	4953095	4953274	180	180	2.10366	7.31158e-08	1.74167e-07
AT1G17145	AT1G17145	-	1:5860119-5862682	5860119	5862682	2564	1422	2.10011	1.09666e-68	4.69952e-67
AT2G01020	AT2G01020	-	2:5782-5945	5782	5945	164	164	2.09968	2.0204e-17	9.43428e-17
ATMG01350	ORF145C	-	Mt:346757-347194	346757	347194	438	438	2.09669	7.26335e-07	1.5901e-06
AT1G70810	AT1G70810	-	1:26704130-26705236	26704130	26705236	1107	720	2.09559	8.70361e-44	1.47032e-42
AT1G19570	ATDHAR1	-	1:6773302-6774528	6773302	6774528	1227	917	2.09534	1.45586e-56	3.8931e-55
AT5G39530	AT5G39530	-	5:15826089-15828035	15826089	15828035	1947	1434	2.09204	6.98783e-42	1.09725e-40
AT3G59940	AT3G59940	-	3:22142900-22144439	22142900	22144439	1540	1540	2.09146	7.10256e-34	7.87329e-33
AT3G41979	AT3G41979	-	3:14199753-14199916	14199753	14199916	164	164	2.09059	1.23832e-17	5.85175e-17
AT2G45380	AT2G45380	-	2:18699428-18703093	18699428	18703093	3666	2312	2.08963	1.4064e-59	4.24353e-58
AT4G15620	AT4G15620	-	4:8913838-8915663	8913838	8915663	1826	802	2.08934	4.00503e-30	3.7249e-29
AT5G47560	ATSDAT	-	5:19287369-19290465	19287369	19290465	3097	2267	2.08805	9.15892e-18	4.37329e-17
AT1G06110	SKIP16	-	1:1853077-1855031	1853077	1855031	1955	1564	2.08774	9.7088e-61	3.06606e-59
AT3G54940	AT3G54940	-	3:20354351-20356318	20354351	20356318	1968	1346	2.08655	2.36597e-51	5.34698e-50
AT5G01720	AT5G01720	-	5:266723-270483	266723	270483	3761	2485	2.0844	8.84377e-58	2.4581e-56
AT1G07500	AT1G07500	-	1:2304766-2305031	2304766	2305031	266	225	2.08424	6.95726e-43	1.1291e-41
AT1G03610	AT1G03610	-	1:900887-903003	900887	903003	2117	1675	2.08298	6.73566e-79	4.19171e-77
AT3G16140	PSAH-1	-	3:5468509-5469481	5468509	5469481	973	665	2.08189	1.45013e-12	4.92008e-12
AT3G05640	AT3G05640	-	3:1640393-1643253	1640393	1643253	2861	1737	2.0797	8.74797e-48	1.73595e-46
AT1G71250	AT1G71250	-	1:26860118-26861726	26860118	26861726	1609	1276	2.07823	3.31718e-60	1.02277e-58
AT4G25800	AT4G25800	-	4:13124898-13127953	13124898	13127953	3056	2180	2.07747	2.38196e-43	3.93745e-42
AT4G00220	LBD30	-	4:90036-92237	90036	92237	2202	948	2.07691	3.57461e-13	1.26744e-12
AT2G27380	ATEPR1	-	2:11713411-11715696	11713411	11715696	2286	2286	2.07482	5.9461e-22	3.63225e-21
AT2G07737	AT2G07737	-	2:3481085-3482066	3481085	3482066	982	982	2.07382	8.2026e-11	2.46644e-10
AT3G07780	OBE1	-	3:2484469-2487024	2484469	2487024	2556	1933	2.06845	9.41489e-51	2.08594e-49
AT2G04690	AT2G04690	-	2:1644497-1646355	1644497	1646355	1859	975	2.06817	3.32372e-54	8.31029e-53
AT3G30460	AT3G30460	-	3:12104373-12105039	12104373	12105039	667	667	2.06732	3.58472e-07	8.06253e-07
AT1G64820	AT1G64820	-	1:24088605-24090558	24088605	24090558	1954	1509	2.06626	2.59861e-07	5.91299e-07
AT5G01715	AT5G01715	-	5:267185-269354	267185	269354	2170	2170	2.06567	2.49665e-56	6.62395e-55
AT1G04350	AT1G04350	-	1:1165165-1166768	1165165	1166768	1604	1444	2.06468	2.39884e-14	9.22007e-14
AT4G16150	AT4G16150	-	4:9148059-9153292	9148059	9153292	5234	3181	2.06388	3.06128e-58	8.66528e-57
AT5G03180	AT5G03180	-	5:753951-756646	753951	756646	2696	1886	2.06201	3.97107e-59	1.16699e-57
AT1G13640	AT1G13640	-	1:4677027-4679812	4677027	4679812	2786	2489	2.06152	4.13158e-62	1.37128e-60
AT3G48360	BT2	-	3:17908192-17910525	17908192	17910525	2334	1439	2.06	3.24907e-13	1.15443e-12
AT3G54500	AT3G54500	-	3:20175370-20179027	20175370	20179027	3658	2769	2.05679	2.64498e-54	6.65253e-53
AT2G15695	AT2G15695	-	2:6833880-6836434	6833880	6836434	2555	1675	2.05659	1.90066e-77	1.13283e-75
AT5G50770	HSD6	-	5:20646680-20648725	20646680	20648725	2046	1168	2.05647	1.65615e-39	2.35775e-38
AT2G34740	AT2G34740	-	2:14658410-14660305	14658410	14660305	1896	1225	2.05408	3.26893e-31	3.21891e-30
AT5G47810	PFK2	-	5:19356356-19358125	19356356	19358125	1770	1684	2.05359	2.45379e-52	5.69757e-51
AT2G26975	AT2G26975	-	2:11512861-11513553	11512861	11513553	693	693	2.0476	6.99712e-19	3.56963e-18
AT5G38870	AT5G38870	-	5:15561465-15562122	15561465	15562122	658	658	2.04714	6.28284e-13	2.18871e-12
AT1G08570	ACHT4	-	1:2712883-2714734	2712883	2714734	1852	1426	2.04648	3.33622e-56	8.81002e-55
AT5G14090	AT5G14090	-	5:4547202-4549417	4547202	4549417	2216	1308	2.04546	7.7272e-14	2.87659e-13
AT2G02390	GSTZ1	-	2:628899-631114	628899	631114	2216	1170	2.04522	4.92753e-53	1.18142e-51
AT2G46260	AT2G46260	-	2:18995968-18998633	18995968	18998633	2666	1999	2.04451	1.51881e-59	4.55024e-58
ATCG00130	ATPF	-	Pt:11529-12798	11529	12798	1270	555	2.04387	0.0067939	0.00992838
AT4G36900	RAP2.10	-	4:17388814-17389837	17388814	17389837	1024	1024	2.04285	7.37086e-24	5.04515e-23
AT3G08940	LHCB4.2	-	3:2717675-2718883	2717675	2718883	1209	1209	2.0404	6.76644e-26	5.18026e-25
AT3G51880	NFD1	-	3:19246984-19249124	19246984	19249124	2141	995	2.04001	5.54657e-57	1.49979e-55
AT4G35770	DIN1	-	4:16944941-16946192	16944941	16946192	1252	970	2.03997	1.03076e-41	1.60512e-40
AT1G20693	NFD02	-	1:7176775-7178820	7176775	7178820	2046	954	2.03879	6.08651e-64	2.14192e-62
AT3G09030	AT3G09030	-	3:2754782-2756507	2754782	2756507	1726	1726	2.03874	1.57745e-57	4.32063e-56
AT5G02070	AT5G02070	-	5:405895-408220	405895	408220	2326	1974	2.03477	1.76895e-34	2.01231e-33
AT3G54850	ATPUB14	-	3:20321422-20324020	20321422	20324020	2599	2173	2.03458	2.12682e-62	7.15719e-61
AT5G61600	ERF104	-	5:24766386-24767430	24766386	24767430	1045	1045	2.03431	9.94765e-38	1.3114e-36
AT2G29060	AT2G29060	-	2:12481744-12484087	12481744	12484087	2344	2171	2.03319	3.04498e-32	3.14474e-31
AT3G01850	AT3G01850	-	3:299987-302038	299987	302038	2052	1077	2.03292	4.37019e-65	1.60117e-63
AT5G62670	AHA11	-	5:25159230-25165209	25159230	25165209	5980	3271	2.02929	1.28274e-56	3.43559e-55
AT1G03890	AT1G03890	-	1:989198-991020	989198	991020	1823	1520	2.02739	6.96498e-19	3.5543e-18
AT2G07826	AT2G07826	-	2:3361110-3361415	3361110	3361415	306	306	2.02525	2.49033e-08	6.15924e-08
AT1G64180	AT1G64180	-	1:23821516-23824359	23821516	23824359	2844	2072	2.02399	6.03618e-47	1.16505e-45
AT1G22890	AT1G22890	-	1:8102818-8103532	8102818	8103532	715	559	2.0234	5.33645e-09	1.39012e-08
ATMG01210	ORF101B	-	Mt:304779-305084	304779	305084	306	306	2.02337	3.34503e-08	8.19411e-08
AT2G16586	AT2G16586	-	2:7190937-7191938	7190937	7191938	1002	1002	2.02254	1.36385e-46	2.57368e-45
AT2G32120	HSP70T-2	-	2:13651510-13653921	13651510	13653921	2412	2093	2.02149	2.7428e-41	4.18642e-40
AT1G62810	AT1G62810	-	1:23257726-23261966	23257726	23261966	4241	2860	2.0187	2.28597e-72	1.11834e-70
AT5G10740	AT5G10740	-	5:3393569-3396200	3393569	3396200	2632	1537	2.01541	1.12833e-65	4.23486e-64
AT2G39100	AT2G39100	-	2:16317438-16319387	16317438	16319387	1950	1326	2.00709	1.57933e-62	5.36813e-61
AT5G07470	ATMSRA3	-	5:2362570-2364374	2362570	2364374	1805	887	2.00515	1.36512e-47	2.69317e-46
AT5G03490	AT5G03490	-	5:871460-873057	871460	873057	1598	1598	2.00325	2.04871e-19	1.08201e-18
AT3G16990	AT3G16990	-	3:5795834-5796850	5795834	5796850	1017	836	2.0021	9.14115e-73	4.51114e-71
AT5G44790	RAN1	-	5:18075610-18079988	18075610	18079988	4379	3413	2.001	1.52355e-67	6.12569e-66
AT1G15010	AT1G15010	-	1:5171207-5171742	5171207	5171742	536	536	1.99878	1.22578e-13	4.49692e-13
AT5G54640	ATHTA1	-	5:22196477-22197492	22196477	22197492	1016	669	1.99697	1.81197e-57	4.94696e-56
AT4G31510	AT4G31510	-	4:15276180-15277219	15276180	15277219	1040	793	1.99556	8.68822e-46	1.58305e-44
AT3G25719	AT3G25719	-	3:9379916-9380068	9379916	9380068	153	153	1.99216	0.000317909	0.000539042
AT5G44260	AT5G44260	-	5:17829626-17831225	17829626	17831225	1600	1600	1.98898	1.42434e-61	4.64543e-60
AT3G27210	AT3G27210	-	3:10045186-10047343	10045186	10047343	2158	1098	1.98898	2.29185e-24	1.61643e-23
AT5G20420	CHR42	-	5:6899015-6904167	6899015	6904167	5153	3914	1.98787	2.21197e-24	1.56399e-23
AT3G10190	AT3G10190	-	3:3155298-3156143	3155298	3156143	846	846	1.98773	5.6805e-16	2.43058e-15
AT3G53410	AT3G53410	-	3:19800951-19802328	19800951	19802328	1378	1178	1.98694	5.79618e-55	1.48654e-53
AT1G09570	PHYA	-	1:3095256-3100357	3095256	3100357	5102	3829	1.98631	2.05577e-46	3.84934e-45
AT2G05185	AT2G05185	-	2:1876938-1878219	1876938	1878219	1282	684	1.98336	1.40207e-45	2.54099e-44
AT4G37260	MYB73	-	4:17540490-17541799	17540490	17541799	1310	1310	1.98151	2.95791e-52	6.84933e-51
AT3G48270	CYP71A26	-	3:17876571-17878173	17876571	17878173	1603	1470	1.97699	2.46171e-68	1.02887e-66
AT1G77090	AT1G77090	-	1:28960387-28961922	28960387	28961922	1536	1019	1.97469	4.43366e-44	7.55777e-43
AT5G20380	PHT4;5	-	5:6887725-6892432	6887725	6892432	4708	1839	1.97401	5.61452e-67	2.22049e-65
AT3G09910	ATRAB18C	-	3:3036714-3038449	3036714	3038449	1736	1096	1.96751	5.93541e-39	8.25544e-38
ATCG00950	RRN23S.1	-	Pt:104691-107500	104691	107500	2810	2810	1.96745	0.0118143	0.0167516
ATCG01180	RRN23S.2	-	Pt:131149-133958	131149	133958	2810	2810	1.96703	0.0118252	0.0167657
AT5G23155	AT5G23155	-	5:7794142-7795010	7794142	7795010	869	222	1.96603	1.07225e-13	3.95253e-13
AT5G23380	AT5G23380	-	5:7866742-7870302	7866742	7870302	3561	1110	1.96597	1.00602e-58	2.90596e-57
AT5G60100	APRR3	-	5:24197998-24201404	24197998	24201404	3407	2222	1.9648	8.04865e-67	3.13916e-65
AT3G26580	AT3G26580	-	3:9758887-9760544	9758887	9760544	1658	1294	1.9643	1.02235e-74	5.4591e-73
AT3G30778	AT3G30778	-	3:12459185-12459304	12459185	12459304	120	120	1.96186	3.23548e-05	6.09742e-05
AT4G02482	AT4G02482	-	4:1092002-1092484	1092002	1092484	483	405	1.96127	7.83979e-08	1.86435e-07
AT5G16110	AT5G16110	-	5:5260604-5262840	5260604	5262840	2237	1474	1.95891	2.4313e-49	5.10604e-48
AT2G23590	MES8	-	2:10034607-10036000	10034607	10036000	1394	834	1.95825	1.62959e-25	1.21892e-24
AT2G38820	AT2G38820	-	2:16221836-16223662	16221836	16223662	1827	1637	1.95733	1.28128e-46	2.42055e-45
AT1G68050	FKF1	-	1:25508676-25510889	25508676	25510889	2214	2113	1.9569	2.38381e-16	1.04239e-15
AT3G16770	RAP2.3	-	3:5705662-5707023	5705662	5707023	1362	1124	1.95488	1.42867e-35	1.71632e-34
AT5G03795	AT5G03795	-	5:1007390-1010473	1007390	1010473	3084	1821	1.95393	1.09217e-53	2.67929e-52
AT4G21534	AT4G21534	-	4:11456230-11458820	11456230	11458820	2591	1446	1.95286	1.12175e-26	8.87284e-26
AT2G07723	AT2G07723	AT2G07815	2:3441921-3444238	3441921	3444238	2318	2318	1.95277	2.12602e-26	1.65992e-25
AT1G65990	AT1G65990	-	1:24571603-24573471	24571603	24573471	1869	1662	1.95248	9.52447e-30	8.73184e-29
AT4G33800	AT4G33800	-	4:16210009-16211409	16210009	16211409	1401	896	1.95167	2.03459e-32	2.11805e-31
AT3G54366	AT3G54366	-	3:20132886-20133750	20132886	20133750	865	865	1.95091	4.77935e-35	5.61027e-34
AT1G64270	AT1G64270	-	1:23850572-23852785	23850572	23852785	2214	2214	1.95076	2.47577e-30	2.33597e-29
ATMG00110	CCB206	-	Mt:30463-31083	30463	31083	621	621	1.95055	9.48003e-07	2.05176e-06
ATMG00440	ORF152A	-	Mt:116296-116754	116296	116754	459	459	1.94989	6.94889e-05	0.000126732
ATMG01140	ORF152B	-	Mt:292973-293431	292973	293431	459	459	1.94988	6.93748e-05	0.000126542
AT1G49032	AT1G49032	-	1:18138268-18139005	18138268	18139005	738	738	1.94948	1.46553e-35	1.75937e-34
AT4G32290	AT4G32290	-	4:15589674-15591164	15589674	15591164	1491	1491	1.94944	9.01662e-40	1.30337e-38
AT5G64240	MC3	-	5:25695620-25697416	25695620	25697416	1797	1627	1.94843	1.6485e-23	1.10424e-22
AT4G18880	HSF.A4A	-	4:10347582-10349562	10347582	10349562	1981	1904	1.94655	1.86872e-28	1.61635e-27
AT3G15630	AT3G15630	-	3:5296847-5297599	5296847	5297599	753	753	1.94623	1.45397e-10	4.28694e-10
AT4G10120	ATSPS4F	-	4:6314787-6319936	6314787	6319936	5150	3469	1.94603	9.7934e-38	1.29308e-36
AT1G07150	MAPKKK13	-	1:2193941-2195798	2193941	2195798	1858	1669	1.94549	7.2624e-09	1.87394e-08
AT1G76070	AT1G76070	-	1:28546382-28547611	28546382	28547611	1230	1230	1.94534	7.02982e-10	1.96944e-09
AT3G25160	AT3G25160	-	3:9160168-9162067	9160168	9162067	1900	1032	1.9414	4.20706e-06	8.59022e-06
AT3G23490	CYN	-	3:8423011-8424652	8423011	8424652	1642	971	1.94006	9.68333e-53	2.28924e-51
AT4G27900	AT4G27900	-	4:13890644-13893073	13890644	13893073	2430	1296	1.93892	2.16969e-68	9.11322e-67
AT5G04360	ATPU1	-	5:1221566-1228678	1221566	1228678	7113	3037	1.93748	2.03989e-18	1.00845e-17
AT5G27420	CNI1	-	5:9684072-9685561	9684072	9685561	1490	1490	1.93696	2.16447e-11	6.76975e-11
AT3G14130	AT3G14130	-	3:4685646-4688309	4685646	4688309	2664	1442	1.93651	1.90889e-65	7.14864e-64
AT3G53830	AT3G53830	-	3:19940814-19943799	19940814	19943799	2986	1626	1.93616	4.1528e-13	1.46691e-12
AT2G23110	AT2G23110	-	2:9840456-9841366	9840456	9841366	911	874	1.93535	3.15761e-35	3.74817e-34
AT3G12955	AT3G12955	-	3:4135500-4136143	4135500	4136143	644	644	1.93452	3.98608e-35	4.70519e-34
AT4G32770	VTE1	-	4:15804914-15807982	15804914	15807982	3069	1726	1.9342	6.86192e-73	3.40621e-71
AT1G03620	AT1G03620	-	1:904319-906186	904319	906186	1868	860	1.93413	5.05475e-14	1.90264e-13
AT4G04692	AT4G04692	-	4:2375602-2376364	2375602	2376364	763	763	1.93385	1.44914e-38	1.98139e-37
AT1G17530	ATTIM23-1	-	1:6027631-6028506	6027631	6028506	876	876	1.9324	3.53694e-44	6.05358e-43
AT4G38932	AT4G38932	-	4:18151687-18152569	18151687	18152569	883	883	1.93163	2.32332e-36	2.87267e-35
AT5G52570	B2	-	5:21334793-21337002	21334793	21337002	2210	1145	1.93127	1.41303e-39	2.02013e-38
ATCG01210	RRN16S.2	-	Pt:136147-137637	136147	137637	1491	1491	1.93105	0.0112109	0.015936
ATCG00920	RRN16S.1	-	Pt:101012-102502	101012	102502	1491	1491	1.93058	0.0112428	0.0159787
AT1G73020	AT1G73020	-	1:27469534-27473554	27469534	27473554	4021	2551	1.93043	9.14377e-68	3.72059e-66
AT1G21770	AT1G21770	-	1:7651646-7652288	7651646	7652288	643	572	1.92985	2.81307e-36	3.46809e-35
AT4G02970	AT7SL-1	-	4:1317499-1319179	1317499	1319179	1681	813	1.92969	9.69952e-16	4.09538e-15
AT5G55470	ATNHX3	-	5:22469245-22472706	22469245	22472706	3462	1861	1.92857	2.91881e-61	9.41082e-60
AT4G16770	AT4G16770	-	4:9434393-9437172	9434393	9437172	2780	1161	1.92812	1.27866e-49	2.71566e-48
AT5G48540	AT5G48540	-	5:19668964-19669920	19668964	19669920	957	957	1.92585	5.20128e-14	1.95605e-13
AT2G41180	AT2G41180	-	2:17165191-17166025	17165191	17166025	835	835	1.92409	1.46967e-14	5.74133e-14
ATCG00640	RPL33	-	Pt:67488-67688	67488	67688	201	201	1.92408	0.00222909	0.00345151
AT5G10140	FLF	-	5:3173497-3179448	3173497	3179448	5952	1065	1.92187	2.28307e-59	6.80379e-58
AT5G64180	AT5G64180	-	5:25677080-25678357	25677080	25678357	1278	713	1.92076	8.23357e-43	1.33241e-41
AT1G78130	UNE2	-	1:29400140-29401902	29400140	29401902	1763	1592	1.9198	5.82263e-55	1.49107e-53
AT2G01190	AT2G01190	-	2:114975-117640	114975	117640	2666	2555	1.9197	3.71787e-49	7.78867e-48
AT5G62720	AT5G62720	-	5:25191842-25195009	25191842	25195009	3168	1527	1.91887	6.32089e-20	3.45475e-19
AT3G19990	AT3G19990	-	3:6965647-6967248	6965647	6967248	1602	1448	1.91702	1.152e-47	2.27538e-46
AT2G19330	PIRL6	-	2:8372947-8374453	8372947	8374453	1507	1143	1.9164	4.46492e-15	1.80895e-14
AT3G01700	AGP11	-	3:258879-259631	258879	259631	753	753	1.91557	1.71005e-07	3.956e-07
AT5G01520	AT5G01520	-	5:206432-208611	206432	208611	2180	1325	1.91557	7.20087e-57	1.93475e-55
AT4G21323	AT4G21323	-	4:11342494-11345632	11342494	11345632	3139	2412	1.91447	1.15434e-34	1.32472e-33
AT3G14590	NTMC2TYPE6.2	-	3:4904270-4907993	4904270	4907993	3724	2744	1.91269	4.52362e-64	1.59857e-62
AT3G60300	AT3G60300	-	3:22285263-22287511	22285263	22287511	2249	1389	1.91234	3.01511e-36	3.71176e-35
AT5G52420	AT5G52420	-	5:21281773-21282806	21281773	21282806	1034	1034	1.91159	4.93465e-51	1.10342e-49
AT4G01120	GBF2	-	4:481597-484483	481597	484483	2887	1557	1.9103	3.79372e-71	1.76905e-69
AT3G48890	ATMP2	-	3:18129601-18131573	18129601	18131573	1973	990	1.90839	1.03488e-53	2.54245e-52
AT5G16150	PGLCT	-	5:5272557-5275815	5272557	5275815	3259	2097	1.90775	8.1228e-60	2.46849e-58
AT4G21326	ATSBT3.12	-	4:11345974-11349653	11345974	11349653	3680	2977	1.90424	3.88045e-63	1.33505e-61
AT5G24910	CYP714A1	-	5:8567581-8570358	8567581	8570358	2778	1790	1.90388	6.23815e-51	1.39122e-49
AT3G01490	AT3G01490	-	3:190872-193537	190872	193537	2666	1738	1.9021	2.93088e-50	6.35223e-49
AT2G43830	AT2G43830	-	2:18154542-18156488	18154542	18156488	1947	1947	1.90196	1.57401e-13	5.72359e-13
AT3G44290	anac060	-	3:15972909-15975183	15972909	15975183	2275	1172	1.9005	1.75387e-61	5.69822e-60
AT3G07150	AT3G07150	-	3:2263806-2264576	2263806	2264576	771	600	1.89654	1.38766e-16	6.15538e-16
AT2G07722	AT2G07722	-	2:3438742-3439161	3438742	3439161	420	420	1.89633	1.1985e-06	2.5722e-06
AT1G74860	AT1G74860	-	1:28123319-28125882	28123319	28125882	2564	1598	1.89432	3.46716e-41	5.27301e-40
AT3G15790	MBD11	-	3:5343016-5344700	5343016	5344700	1685	1182	1.89367	4.56431e-68	1.889e-66
AT2G07702	AT2G07702	-	2:3372697-3373155	3372697	3373155	459	459	1.89241	8.46719e-05	0.000153059
AT2G33740	CUTA	-	2:14269581-14271723	14269581	14271723	2143	877	1.89106	9.52308e-45	1.66871e-43
AT4G13030	AT4G13030	-	4:7607267-7609843	7607267	7609843	2577	1769	1.89101	1.26438e-54	3.19435e-53
AT1G59900	AT-E1.ALPHA	-	1:22051295-22053885	22051295	22053885	2591	1468	1.8893	2.65944e-51	6.00217e-50
AT2G01010	AT2G01010	-	2:3706-5513	3706	5513	1808	1808	1.8872	6.03465e-05	0.00011079
AT5G52310	LTI140	-	5:21240849-21243613	21240849	21243613	2765	2500	1.88522	1.24655e-22	7.94143e-22
AT5G63190	AT5G63190	-	5:25345542-25348796	25345542	25348796	3255	2612	1.88346	4.44954e-46	8.19559e-45
AT3G23340	ckl10	-	3:8350803-8353959	8350803	8353959	3157	1741	1.88334	1.53426e-52	3.58707e-51
AT1G68570	AT1G68570	-	1:25746736-25750275	25746736	25750275	3540	2031	1.88199	7.97235e-53	1.89268e-51
AT5G53902	U3B	-	5:21887966-21888667	21887966	21888667	702	702	1.87843	1.71909e-17	8.06598e-17
AT5G53905	AT5G53905	-	5:21888148-21889254	21888148	21889254	1107	507	1.87843	1.71927e-17	8.06598e-17
AT5G51810	GA20OX2	-	5:21055188-21056808	21055188	21056808	1621	1400	1.87794	1.76816e-12	5.96209e-12
AT5G05110	AT5G05110	-	5:1507419-1508867	1507419	1508867	1449	997	1.87777	2.65747e-60	8.28416e-59
AT2G28940	AT2G28940	-	2:12426710-12428730	12426710	12428730	2021	1591	1.87772	2.19772e-33	2.38466e-32
AT1G09910	AT1G09910	-	1:3220035-3224541	3220035	3224541	4507	2234	1.87637	1.91206e-61	6.18841e-60
AT5G65280	GCL1	-	5:26085973-26088153	26085973	26088153	2181	1542	1.87551	3.57401e-37	4.60406e-36
AT3G59350	AT3G59350	-	3:21932525-21935192	21932525	21935192	2668	1905	1.87533	3.19775e-60	9.87742e-59
AT2G13960	AT2G13960	-	2:5859585-5861311	5859585	5861311	1727	846	1.87465	5.06627e-10	1.43598e-09
AT1G64230	UBC28	-	1:23833551-23835536	23833551	23835536	1986	1052	1.87364	3.4418e-42	5.43971e-41
AT5G54075	U3D	-	5:21945349-21945709	21945349	21945709	361	361	1.87326	2.67923e-20	1.49921e-19
AT3G29670	AT3G29670	-	3:11527872-11529350	11527872	11529350	1479	1479	1.87196	1.50963e-12	5.11275e-12
AT4G19880	AT4G19880	-	4:10784391-10786556	10784391	10786556	2166	1629	1.87147	4.58642e-46	8.43852e-45
AT1G06570	PDS1	-	1:2011885-2013545	2011885	2013545	1661	1554	1.87113	9.82528e-38	1.29628e-36
AT5G60220	TET4	-	5:24248957-24250065	24248957	24250065	1109	984	1.86947	2.39032e-58	6.78876e-57
AT5G64780	AT5G64780	-	5:25900559-25902127	25900559	25902127	1569	841	1.86813	5.16577e-17	2.34615e-16
AT3G06895	AT3G06895	-	3:2178129-2178291	2178129	2178291	163	163	1.868	1.41581e-06	3.02173e-06
AT5G46410	SSP4	-	5:18825103-18829221	18825103	18829221	4119	2560	1.86598	7.92535e-66	2.98117e-64
AT1G48990	AT1G48990	-	1:18121434-18122155	18121434	18122155	722	722	1.86453	3.35279e-35	3.97706e-34
AT2G41178	AT2G41178	-	2:17164795-17165449	17164795	17165449	655	345	1.86302	3.6831e-06	7.57703e-06
AT3G41768	AT3G41768	-	3:14197677-14199484	14197677	14199484	1808	1808	1.86229	7.06335e-05	0.000128727
AT3G47950	AHA4	-	3:17692702-17697999	17692702	17697999	5298	3220	1.86171	4.9502e-52	1.13539e-50
AT3G61900	AT3G61900	-	3:22925813-22926379	22925813	22926379	567	411	1.86012	2.25183e-43	3.72598e-42
AT4G13530	AT4G13530	-	4:7866719-7868742	7866719	7868742	2024	1089	1.86012	3.94479e-49	8.25383e-48
AT3G05930	GLP8	-	3:1770337-1771409	1770337	1771409	1073	926	1.85793	6.54716e-26	5.0192e-25
AT5G63195	AT5G63195	-	5:25346729-25348386	25346729	25348386	1658	1520	1.85608	6.32743e-39	8.78626e-38
AT3G27870	AT3G27870	-	3:10330950-10335305	10330950	10335305	4356	3587	1.8558	3.41512e-43	5.59611e-42
AT4G36195	AT4G36195	AT4G36190	4:17126932-17129946	17126932	17129946	3015	1829	1.85149	7.36073e-48	1.46755e-46
AT5G64860	DPE1	-	5:25925173-25928848	25925173	25928848	3676	1991	1.85129	1.50368e-51	3.4119e-50
AT1G03760	AT1G03760	-	1:941062-943377	941062	943377	2316	1382	1.85127	2.55739e-69	1.11858e-67
AT1G76590	AT1G76590	-	1:28740691-28742207	28740691	28742207	1517	1235	1.85083	9.37699e-44	1.57935e-42
AT5G66730	AT5G66730	-	5:26641652-26644402	26641652	26644402	2751	2284	1.85062	2.25047e-47	4.39882e-46
AT3G24190	AT3G24190	-	3:8743253-8747901	8743253	8747901	4649	2646	1.85058	4.51521e-50	9.72379e-49
AT3G15290	AT3G15290	-	3:5144997-5146856	5144997	5146856	1860	1185	1.84978	2.23203e-69	9.78799e-68
AT1G69010	BIM2	-	1:25941675-25943836	25941675	25943836	2162	1302	1.84971	8.94442e-59	2.59695e-57
AT2G39000	AT2G39000	-	2:16286336-16287970	16286336	16287970	1635	1027	1.84916	1.06166e-55	2.77326e-54
AT2G35550	ATBPC7	-	2:14929281-14930892	14929281	14930892	1612	1335	1.84805	1.59287e-28	1.38057e-27
AT5G51970	AT5G51970	-	5:21111445-21113403	21111445	21113403	1959	1589	1.84682	7.16565e-50	1.53341e-48
AT4G27410	RD26	-	4:13707240-13709149	13707240	13709149	1910	1827	1.84665	1.88788e-14	7.31766e-14
AT4G10845	AT4G10845	-	4:6662595-6663964	6662595	6663964	1370	821	1.84524	7.7565e-08	1.8448e-07
AT5G23850	AT5G23850	-	5:8038052-8040938	8038052	8040938	2887	1900	1.84359	4.19964e-31	4.11385e-30
AT3G44100	AT3G44100	-	3:15866039-15867310	15866039	15867310	1272	619	1.84045	2.34541e-44	4.03463e-43
AT4G17840	AT4G17840	-	4:9918052-9920475	9918052	9920475	2424	1724	1.83882	9.03103e-36	1.09348e-34
AT1G48300	AT1G48300	-	1:17847356-17848564	17847356	17848564	1209	1119	1.83822	3.47114e-33	3.73528e-32
AT3G15260	AT3G15260	-	3:5138686-5142644	5138686	5142644	3959	1408	1.83796	8.48112e-46	1.54698e-44
AT1G15180	AT1G15180	-	1:5224385-5226702	5224385	5226702	2318	1868	1.83619	1.42359e-49	3.01591e-48
AT1G76705	AT1G76705	-	1:28786450-28787328	28786450	28787328	879	651	1.83586	2.21728e-08	5.50725e-08
AT2G38980	AT2G38980	-	2:16277009-16279354	16277009	16279354	2346	2346	1.83448	5.59831e-44	9.50478e-43
AT1G60730	AT1G60730	-	1:22358035-22360184	22358035	22360184	2150	1496	1.83405	2.29163e-68	9.60158e-67
AT1G07473	AT1G07473	-	1:2294566-2295489	2294566	2295489	924	924	1.83374	1.22586e-07	2.87358e-07
AT1G22180	AT1G22180	-	1:7828326-7830392	7828326	7830392	2067	1814	1.83332	9.32206e-44	1.57166e-42
AT5G60460	AT5G60460	-	5:24317437-24317935	24317437	24317935	499	499	1.83313	3.17677e-30	2.97582e-29
AT2G33050	AtRLP26	-	2:14021870-14024398	14021870	14024398	2529	2529	1.83299	4.70244e-60	1.442e-58
AT1G62510	AT1G62510	-	1:23136369-23137191	23136369	23137191	823	823	1.83188	1.41373e-35	1.69959e-34
AT2G13463	AT2G13463	-	2:5609987-5610172	5609987	5610172	186	186	1.83147	9.86165e-05	0.000176943
AT1G74780	AT1G74780	-	1:28095815-28098185	28095815	28098185	2371	1976	1.83138	8.33282e-31	8.0233e-30
AT3G54320	WRI1	-	3:20114684-20118639	20114684	20118639	3956	1589	1.83128	1.3705e-12	4.65738e-12
AT2G28400	AT2G28400	-	2:12148304-12149052	12148304	12149052	749	749	1.83053	1.25763e-41	1.95123e-40
AT1G12130	AT1G12130	-	1:4118594-4120871	4118594	4120871	2278	1413	1.83006	7.04172e-54	1.74517e-52
AT1G51430	AT1G51430	-	1:19068241-19069776	19068241	19069776	1536	893	1.82964	1.18004e-35	1.42167e-34
AT1G11370	AT1G11370	-	1:3828098-3830945	3828098	3830945	2848	867	1.82795	4.38417e-07	9.78667e-07
AT5G17900	AT5G17900	-	5:5924707-5926901	5924707	5926901	2195	1686	1.82691	9.62121e-53	2.27774e-51
AT1G59700	ATGSTU16	-	1:21936296-21937959	21936296	21937959	1664	1064	1.82665	1.56206e-22	9.88451e-22
AT1G68190	AT1G68190	-	1:25559246-25561212	25559246	25561212	1967	1340	1.82591	4.57474e-32	4.7074e-31
AT3G02390	AT3G02390	-	3:488780-489474	488780	489474	695	513	1.82588	7.17857e-22	4.36778e-21
AT3G05932	AT3G05932	-	3:1770279-1771716	1770279	1771716	1438	1159	1.82478	3.52516e-30	3.28582e-29
AT2G07696	AT2G07696	AT2G07599	2:3351050-3351881	3351050	3351881	832	832	1.82475	8.95723e-07	1.94533e-06
AT1G27420	AT1G27420	-	1:9519108-9520520	9519108	9520520	1413	1041	1.82269	3.63967e-28	3.09903e-27
AT1G01725	AT1G01725	-	1:269792-270775	269792	270775	984	453	1.82191	1.81297e-29	1.6367e-28
AT2G42100	AT2G42100	-	2:17560211-17561945	17560211	17561945	1735	1137	1.82176	6.14961e-11	1.86616e-10
AT2G33770	ATUBC24	-	2:14277558-14283040	14277558	14283040	5483	4103	1.82059	5.31454e-49	1.10924e-47
AT4G21020	AT4G21020	-	4:11228187-11229577	11228187	11229577	1391	1062	1.82022	2.22886e-44	3.83803e-43
AT4G17730	SYP23	-	4:9865103-9867022	9865103	9867022	1920	1403	1.81966	2.12751e-50	4.64078e-49
AT3G52240	AT3G52240	-	3:19372714-19375880	19372714	19375880	3167	2312	1.81924	9.90613e-60	3.00504e-58
AT2G13360	AGT1	-	2:5539240-5541358	5539240	5541358	2119	1540	1.81913	1.78156e-47	3.50249e-46
AT2G33051	AT2G33051	-	2:14022037-14025085	14022037	14025085	3049	2072	1.81669	8.63578e-57	2.31661e-55
AT5G22690	AT5G22690	-	5:7541271-7545182	7541271	7545182	3912	3419	1.81405	6.16088e-39	8.562e-38
AT5G35960	AT5G35960	-	5:14108524-14110536	14108524	14110536	2013	1290	1.81115	5.46995e-09	1.4238e-08
AT1G15150	AT1G15150	-	1:5212615-5214858	5212615	5214858	2244	1658	1.81106	2.63535e-21	1.55974e-20
AT3G06900	U4.2	-	3:2178053-2178626	2178053	2178626	574	574	1.80956	1.83894e-06	3.88368e-06
AT1G48470	GLN1;5	-	1:17913711-17916098	17913711	17916098	2388	1307	1.80862	3.29945e-52	7.62975e-51
AT4G33940	AT4G33940	-	4:16266023-16267786	16266023	16267786	1764	1025	1.80609	1.4236e-48	2.92089e-47
AT3G11810	AT3G11810	-	3:3727796-3729031	3727796	3729031	1236	1236	1.80575	3.71095e-59	1.09434e-57
AT5G28380	AT5G28380	-	5:10338723-10341007	10338723	10341007	2285	1173	1.80518	5.18056e-14	1.9487e-13
AT1G52710	AT1G52710	-	1:19638285-19640239	19638285	19640239	1955	742	1.8047	3.3276e-45	5.92907e-44
AT1G73380	AT1G73380	-	1:27589032-27590822	27589032	27590822	1791	1538	1.80222	3.69442e-58	1.04052e-56
AT1G67310	AT1G67310	-	1:25198182-25203126	25198182	25203126	4945	3051	1.79904	9.25859e-46	1.68516e-44
AT5G03380	AT5G03380	-	5:832104-834412	832104	834412	2309	1675	1.79744	3.96231e-59	1.16643e-57
AT4G27530	AT4G27530	-	4:13752633-13753257	13752633	13753257	625	535	1.79697	3.3307e-28	2.84167e-27
AT3G46640	LUX	-	3:17183070-17185218	17183070	17185218	2149	1725	1.79324	4.26573e-55	1.09903e-53
AT3G05880	RCI2A	-	3:1755497-1756540	1755497	1756540	1044	495	1.79265	1.15418e-27	9.58624e-27
AT5G48775	AT5G48775	-	5:19774170-19776460	19774170	19776460	2291	2060	1.79263	1.74793e-27	1.43907e-26
AT2G01940	ATIDD15	-	2:432275-435077	432275	435077	2803	2057	1.79203	1.32562e-31	1.33723e-30
AT2G42980	AT2G42980	-	2:17875005-17876588	17875005	17876588	1584	1584	1.78929	5.64675e-08	1.35694e-07
AT3G46230	ATHSP17.4	-	3:16984118-16984841	16984118	16984841	724	724	1.78922	1.24106e-19	6.64792e-19
AT5G03880	AT5G03880	-	5:1038508-1041480	1038508	1041480	2973	1213	1.78764	1.04268e-67	4.22234e-66
AT1G19110	AT1G19110	-	1:6602126-6605908	6602126	6605908	3783	2551	1.78748	6.9691e-46	1.27256e-44
AT2G07815	AT2G07815	AT2G07723	2:3443688-3445582	3443688	3445582	1895	920	1.78685	2.15171e-12	7.21799e-12
AT4G01280	AT4G01280	-	4:535211-537322	535211	537322	2112	1457	1.78672	2.60429e-59	7.73382e-58
AT1G32583	AT1G32583	-	1:11785806-11788286	11785806	11788286	2481	1962	1.78617	2.71668e-12	9.05398e-12
AT3G04890	AT3G04890	-	3:1347646-1349202	1347646	1349202	1557	868	1.78457	6.54556e-32	6.69062e-31
ATMG00620	ORF139B	-	Mt:182278-182697	182278	182697	420	420	1.78321	5.04544e-06	1.02183e-05
ATMG00630	ORF110B	-	Mt:183111-183443	183111	183443	333	333	1.78268	4.5445e-07	1.0131e-06
AT5G48770	AT5G48770	-	5:19773277-19777242	19773277	19777242	3966	3573	1.78264	2.50207e-30	2.35947e-29
AT1G07650	AT1G07650	-	1:2359549-2366561	2359549	2366561	7013	3469	1.78212	3.54307e-43	5.80015e-42
AT5G61530	AT5G61530	-	5:24742048-24744784	24742048	24744784	2737	1671	1.78205	6.75848e-62	2.2257e-60
AT3G51890	AT3G51890	-	3:19249480-19250974	19249480	19250974	1495	1067	1.78045	1.02466e-29	9.36522e-29
AT1G24735	AT1G24735	-	1:8757864-8759645	8757864	8759645	1782	1186	1.77805	2.29091e-54	5.77057e-53
AT3G15580	ATG8I	-	3:5273895-5275095	5273895	5275095	1201	623	1.77402	6.47574e-46	1.18375e-44
AT3G14060	AT3G14060	-	3:4657046-4657601	4657046	4657601	556	556	1.77401	1.49743e-07	3.4822e-07
AT5G65070	AGL69	-	5:25992243-25996174	25992243	25996174	3932	1103	1.7737	5.38654e-50	1.15561e-48
AT2G20920	AT2G20920	-	2:8998686-8999932	8998686	8999932	1247	1049	1.77357	2.95234e-43	4.86131e-42
AT1G08250	ADT6	-	1:2588857-2590301	2588857	2590301	1445	1445	1.77239	1.19312e-10	3.53818e-10
ATMG00170	ORF139A	-	Mt:48113-48532	48113	48532	420	420	1.76886	5.6937e-06	1.14749e-05
AT5G01750	AT5G01750	-	5:289765-291326	289765	291326	1562	1384	1.76862	8.63181e-28	7.21534e-27
AT3G02620	AT3G02620	-	3:560256-561880	560256	561880	1625	1332	1.76784	1.47101e-27	1.21581e-26
AT2G23320	WRKY15	-	2:9924933-9926372	9924933	9926372	1440	1237	1.76763	2.42681e-24	1.70663e-23
AT1G73210	AT1G73210	-	1:27528052-27530952	27528052	27530952	2901	1820	1.76734	1.66694e-40	2.47946e-39
AT1G49720	ABF1	-	1:18400092-18402628	18400092	18402628	2537	1631	1.76719	9.22316e-45	1.61783e-43
AT1G07230	NPC1	-	1:2220253-2222982	2220253	2222982	2730	2062	1.76595	1.23301e-61	4.02919e-60
AT1G52920	GCR2	-	1:19709275-19711052	19709275	19711052	1778	1322	1.76472	5.62192e-25	4.10713e-24
AT4G28652	AT4G28652	-	4:14144954-14147600	14144954	14147600	2647	2346	1.76451	1.52455e-58	4.3665e-57
AT1G61740	AT1G61740	-	1:22798069-22801073	22798069	22801073	3005	1726	1.76423	6.3815e-33	6.76815e-32
AT4G21320	HSA32	-	4:11340362-11341877	11340362	11341877	1516	1136	1.76288	2.90118e-43	4.78172e-42
ATMG00400	ORF157	-	Mt:110930-111403	110930	111403	474	474	1.76283	3.38864e-07	7.63876e-07
AT4G39890	AtRABH1c	-	4:18505962-18507586	18505962	18507586	1625	922	1.76278	1.63654e-20	9.2915e-20
AT3G10250	AT3G10250	-	3:3167951-3170931	3167951	3170931	2981	1414	1.76272	1.42083e-50	3.11938e-49
AT2G34390	NLM4	-	2:14514487-14515915	14514487	14515915	1429	1119	1.76026	1.526e-14	5.94764e-14
AT1G02850	BGLU11	-	1:630505-633259	630505	633259	2755	1804	1.75966	3.77721e-37	4.86211e-36
AT5G45660	AT5G45660	-	5:18525071-18527007	18525071	18527007	1937	994	1.75846	1.22086e-48	2.51099e-47
AT5G62130	AT5G62130	-	5:24950264-24953232	24950264	24953232	2969	2039	1.75712	9.33588e-18	4.45653e-17
AT1G62710	BETA-VPE	-	1:23223874-23226916	23223874	23226916	3043	1716	1.75627	1.10013e-44	1.92176e-43
AT1G67100	LBD40	-	1:25053734-25054847	25053734	25054847	1114	957	1.75539	6.81903e-41	1.02692e-39
AT1G03380	ATATG18G	-	1:835785-840940	835785	840940	5156	3732	1.75505	8.7373e-42	1.36436e-40
ATMG01270	RPS7	-	Mt:314627-315073	314627	315073	447	447	1.75456	3.57112e-05	6.70011e-05
AT5G10190	AT5G10190	-	5:3199133-3201363	3199133	3201363	2231	1762	1.75355	9.18664e-15	3.64003e-14
AT1G27461	AT1G27461	-	1:9537746-9539013	9537746	9539013	1268	1268	1.75248	2.00293e-44	3.46662e-43
AT2G45620	AT2G45620	-	2:18792864-18795904	18792864	18795904	3041	2528	1.75175	2.82858e-46	5.27306e-45
AT1G34580	AT1G34580	-	1:12660551-12663870	12660551	12663870	3320	1918	1.7514	1.78013e-19	9.46365e-19
AT4G14720	PPD2	-	4:8431973-8435075	8431973	8435075	3103	1568	1.75122	1.84453e-46	3.46147e-45
AT5G22545	AT5G22545	-	5:7483253-7483811	7483253	7483811	559	559	1.7502	3.50846e-09	9.27064e-09
AT3G16190	AT3G16190	-	3:5489701-5491248	5489701	5491248	1548	826	1.74989	2.03389e-44	3.51661e-43
AT1G55850	ATCSLE1	-	1:20876699-20879482	20876699	20879482	2784	2311	1.74953	5.95597e-40	8.66868e-39
AT1G33050	AT1G33050	AT1G33055	1:11967816-11971532	11967816	11971532	3717	2891	1.7492	1.57901e-45	2.85251e-44
AT5G08240	AT5G08240	-	5:2650837-2652398	2650837	2652398	1562	1384	1.74819	5.51506e-25	4.03255e-24
AT2G16595	AT2G16595	-	2:7198127-7200297	7198127	7200297	2171	1203	1.74814	1.07146e-40	1.60217e-39
AT5G09970	CYP78A7	-	5:3111945-3114239	3111945	3114239	2295	2159	1.7476	7.92597e-51	1.75836e-49
AT3G52850	ATELP1	-	3:19587821-19591947	19587821	19591947	4127	2307	1.7475	2.032e-45	3.65522e-44
AT1G08630	THA1	-	1:2743761-2747967	2743761	2747967	4207	1710	1.74648	3.39305e-11	1.04845e-10
AT2G24420	AT2G24420	-	2:10380026-10383405	10380026	10383405	3380	1932	1.74623	1.24478e-44	2.16996e-43
AT5G54520	AT5G54520	-	5:22146514-22149120	22146514	22149120	2607	1672	1.74512	1.64752e-43	2.74755e-42
AT2G01590	CRR3	-	2:266630-267798	266630	267798	1169	989	1.74494	1.34201e-12	4.56331e-12
AT5G14380	AGP6	-	5:4635797-4636676	4635797	4636676	880	880	1.74485	1.42008e-06	3.02932e-06
AT5G47070	AT5G47070	-	5:19118543-19120909	19118543	19120909	2367	1754	1.74479	1.26139e-27	1.04613e-26
AT5G51760	AHG1	-	5:21026916-21029188	21026916	21029188	2273	1527	1.74338	1.41241e-43	2.36711e-42
AT5G53360	AT5G53360	-	5:21647902-21649567	21647902	21649567	1666	1380	1.74298	1.02497e-40	1.53401e-39
AT5G05960	AT5G05960	-	5:1790231-1790833	1790231	1790833	603	515	1.74293	4.1222e-06	8.42711e-06
AT5G22270	AT5G22270	-	5:7372233-7373102	7372233	7373102	870	646	1.74226	7.9365e-05	0.000143896
AT4G21400	CRK28	-	4:11399131-11401709	11399131	11401709	2579	2223	1.7413	5.4845e-49	1.1419e-47
AT5G13240	AT5G13240	-	5:4225005-4227613	4225005	4227613	2609	1058	1.74021	5.41832e-53	1.2936e-51
ATMG00300	ORF145A	-	Mt:89617-90054	89617	90054	438	438	1.74012	4.32565e-05	8.03912e-05
AT5G17550	PEX19-2	-	5:5786510-5788239	5786510	5788239	1730	1044	1.73989	6.95985e-47	1.34027e-45
AT5G01350	AT5G01350	-	5:145636-147200	145636	147200	1565	547	1.73972	1.67386e-32	1.7479e-31
AT2G01080	AT2G01080	-	2:77888-79334	77888	79334	1447	1004	1.73833	2.78369e-20	1.5551e-19
AT5G63860	UVR8	-	5:25554508-25559499	25554508	25559499	4992	2117	1.73738	3.00911e-47	5.87489e-46
AT5G49640	AT5G49640	-	5:20151163-20151842	20151163	20151842	680	680	1.73723	1.1866e-25	8.95081e-25
AT1G22600	AT1G22600	-	1:7987141-7989217	7987141	7989217	2077	1355	1.73669	1.29364e-41	2.00342e-40
AT2G32340	AT2G32340	-	2:13732247-13734534	13732247	13734534	2288	1256	1.73655	4.19713e-12	1.37924e-11
AT2G20400	AT2G20400	-	2:8799187-8801973	8799187	8801973	2787	1737	1.73626	8.83999e-49	1.83151e-47
AT3G53950	AT3G53950	-	3:19975619-19977439	19975619	19977439	1821	1821	1.73309	8.71712e-09	2.23636e-08
AT1G68670	AT1G68670	-	1:25782029-25784076	25782029	25784076	2048	1583	1.73289	1.02294e-46	1.94772e-45
AT5G04860	AT5G04860	-	5:1411565-1414677	1411565	1414677	3113	2762	1.73245	4.27526e-21	2.5006e-20
AT4G25150	AT4G25150	-	4:12901534-12903125	12901534	12903125	1592	1228	1.73189	1.93155e-09	5.21292e-09
AT4G16765	AT4G16765	-	4:9429875-9432437	9429875	9432437	2563	1292	1.73149	6.65318e-52	1.52393e-50
AT3G10020	AT3G10020	-	3:3091043-3091766	3091043	3091766	724	724	1.73139	3.39793e-21	1.99919e-20
AT2G35820	AT2G35820	AT2G35830	2:15050912-15052239	15050912	15052239	1328	835	1.73113	7.60394e-59	2.21917e-57
AT1G07040	AT1G07040	-	1:2160938-2163308	2160938	2163308	2371	1676	1.73071	1.25345e-46	2.37329e-45
AT5G04880	AT5G04880	-	5:1420727-1422582	1420727	1422582	1856	1856	1.73035	6.47608e-33	6.86416e-32
AT1G01500	AT1G01500	-	1:185133-186923	185133	186923	1791	1461	1.72815	1.36073e-34	1.55734e-33
AT2G44410	AT2G44410	-	2:18328417-18330336	18328417	18330336	1920	1774	1.72811	2.17661e-38	2.95457e-37
AT3G06170	AT3G06170	-	3:1867415-1869948	1867415	1869948	2534	1545	1.7271	3.00818e-58	8.52922e-57
AT4G00040	AT4G00040	-	4:14627-16079	14627	16079	1453	1366	1.72447	1.98236e-36	2.46188e-35
AT5G55860	AT5G55860	-	5:22609532-22612393	22609532	22612393	2862	2469	1.72444	2.71238e-33	2.9337e-32
AT4G24230	ACBP3	-	4:12566631-12568846	12566631	12568846	2216	1786	1.72437	6.64913e-12	2.15406e-11
AT1G01700	ATROPGEF2	-	1:259495-261474	259495	261474	1980	1458	1.72401	6.11796e-13	2.13435e-12
AT5G38200	AT5G38200	-	5:15256276-15258755	15256276	15258755	2480	1699	1.72285	5.96971e-26	4.58689e-25
AT2G07736	AT2G07736	-	2:3480151-3480633	3480151	3480633	483	483	1.72174	6.61517e-05	0.000121015
AT1G07985	AT1G07985	-	1:2475405-2476155	2475405	2476155	751	751	1.72157	6.14096e-31	5.95008e-30
AT1G16090	WAKL7	-	1:5516259-5517822	5516259	5517822	1564	1310	1.72075	1.63986e-25	1.22606e-24
AT4G29380	AT4G29380	-	4:14458822-14464859	14458822	14464859	6038	4652	1.71978	1.56286e-41	2.40934e-40
AT5G46250	AT5G46250	-	5:18755311-18758281	18755311	18758281	2971	1579	1.71902	1.05017e-46	1.99733e-45
AT2G30615	AT2G30615	-	2:13041085-13042586	13041085	13042586	1502	1502	1.71766	3.03206e-41	4.61959e-40
AT2G07599	AT2G07599	AT2G07696	2:3348796-3351212	3348796	3351212	2417	1237	1.71712	2.01258e-07	4.62459e-07
AT4G27130	AT4G27130	-	4:13604558-13606448	13604558	13606448	1891	848	1.71526	8.81742e-38	1.16603e-36
AT2G38870	AT2G38870	-	2:16236381-16237280	16236381	16237280	900	608	1.71389	1.50415e-12	5.0952e-12
AT5G09990	PROPEP5	-	5:3124568-3125076	3124568	3125076	509	416	1.71	5.23495e-28	4.41955e-27
AT4G25180	AT4G25180	-	4:12911550-12914014	12911550	12914014	2465	1239	1.70966	2.90151e-52	6.72793e-51
ATMG01370	ORF111D	-	Mt:360717-361052	360717	361052	336	336	1.70832	4.33901e-07	9.69205e-07
AT4G21903	AT4G21903	-	4:11620998-11623797	11620998	11623797	2800	1765	1.70684	1.43096e-10	4.22204e-10
AT1G14642	AT1G14642	-	1:5026364-5026585	5026364	5026585	222	132	1.70607	1.46952e-07	3.41965e-07
ATMG00180	CCB452	-	Mt:51293-53611	51293	53611	2319	1359	1.70513	2.43437e-18	1.19682e-17
AT1G08115	AT1G08115	-	1:2538076-2538237	2538076	2538237	162	162	1.70501	2.80169e-08	6.90008e-08
AT2G46680	ATHB7	-	2:19165403-19166949	19165403	19166949	1547	1327	1.70442	5.49614e-15	2.21232e-14
AT5G42820	U2AF35B	-	5:17169283-17171704	17169283	17171704	2422	1693	1.70418	4.55844e-34	5.09985e-33
ATMG01090	ORF262	-	Mt:279463-280251	279463	280251	789	789	1.7031	2.22223e-12	7.45014e-12
AT1G53280	AT1G53280	-	1:19864770-19867389	19864770	19867389	2620	1537	1.70294	8.70509e-59	2.5318e-57
AT2G30945	AT2G30945	-	2:13172361-13173966	13172361	13173966	1606	642	1.70289	9.75235e-09	2.49363e-08
AT3G22492	AT3G22492	-	3:7971071-7971575	7971071	7971575	505	428	1.702	1.77671e-05	3.42493e-05
AT5G22608	AT5G22608	-	5:7513173-7514453	7513173	7514453	1281	706	1.7018	8.70083e-34	9.57601e-33
AT4G16267	AT4G16267	-	4:9204839-9205948	9204839	9205948	1110	270	1.70106	0.00121757	0.00194029
AT2G37200	AT2G37200	-	2:15621954-15623097	15621954	15623097	1144	737	1.70104	7.94152e-24	5.42478e-23
AT1G68020	ATTPS6	-	1:25497290-25500374	25497290	25500374	3085	2996	1.70001	1.0207e-47	2.02074e-46
AT4G01000	AT4G01000	-	4:431963-433849	431963	433849	1887	1593	1.69991	6.90081e-44	1.16927e-42
AT2G38470	WRKY33	-	2:16108361-16110766	16108361	16110766	2406	1902	1.69954	8.64971e-26	6.58921e-25
AT1G30757	AT1G30757	-	1:10909150-10909784	10909150	10909784	635	635	1.69856	0.000283206	0.000483053
AT3G25910	AT3G25910	-	3:9489221-9491130	9489221	9491130	1910	1515	1.69843	1.00544e-44	1.75999e-43
AT2G45870	AT2G45870	-	2:18875894-18877477	18875894	18877477	1584	1304	1.69842	6.07616e-14	2.27597e-13
AT4G13160	AT4G13160	-	4:7653647-7654925	7653647	7654925	1279	1103	1.69705	2.48914e-31	2.46684e-30
AT3G44730	KP1	-	3:16285741-16291048	16285741	16291048	5308	3607	1.69676	1.00771e-33	1.10692e-32
AT4G27780	ACBP2	-	4:13847549-13849887	13847549	13849887	2339	1548	1.69561	4.03561e-54	1.00753e-52
AT2G42290	AT2G42290	-	2:17616841-17619593	17616841	17619593	2753	2213	1.69473	1.40224e-30	1.33873e-29
AT1G03103	AT1G03103	-	1:747197-748057	747197	748057	861	640	1.69414	2.0488e-06	4.30648e-06
AT3G11930	AT3G11930	-	3:3776237-3777694	3776237	3777694	1458	1119	1.69413	9.13332e-29	7.98552e-28
AT2G14910	AT2G14910	-	2:6406476-6409152	6406476	6409152	2677	1957	1.69412	1.18109e-43	1.9814e-42
AT5G65890	ACR1	-	5:26354853-26357866	26354853	26357866	3014	1839	1.6938	1.94691e-36	2.41963e-35
AT5G56210	WIP2	-	5:22750555-22752732	22750555	22752732	2178	2004	1.69163	1.92985e-34	2.19239e-33
AT1G76020	AT1G76020	-	1:28532097-28533567	28532097	28533567	1471	849	1.69071	2.39909e-08	5.93964e-08
AT1G50970	AT1G50970	-	1:18896323-18900268	18896323	18900268	3946	1710	1.69048	2.6357e-34	2.97629e-33
AT1G06130	GLX2-4	-	1:1857767-1860730	1857767	1860730	2964	1353	1.68993	2.22701e-50	4.85156e-49
AT2G45600	AT2G45600	-	2:18789588-18790952	18789588	18790952	1365	1365	1.6899	3.64556e-26	2.82548e-25
AT1G07250	UGT71C4	-	1:2225900-2227566	2225900	2227566	1667	1667	1.6899	2.7901e-24	1.95642e-23
AT1G03970	GBF4	-	1:1018100-1019247	1018100	1019247	1148	1148	1.68929	1.65899e-48	3.38743e-47
AT5G05550	AT5G05550	-	5:1639032-1640606	1639032	1640606	1575	1207	1.68823	2.64715e-32	2.74057e-31
AT1G55530	AT1G55530	-	1:20729182-20731283	20729182	20731283	2102	1650	1.68712	1.41234e-42	2.26604e-41
AT3G19380	PUB25	-	3:6714392-6716099	6714392	6716099	1708	1708	1.68694	1.56346e-07	3.63028e-07
AT1G35190	AT1G35190	-	1:12890423-12892874	12890423	12892874	2452	1353	1.68637	1.23016e-51	2.80633e-50
AT5G22794	AT5G22794	-	5:7608242-7611591	7608242	7611591	3350	930	1.68613	0.000206657	0.000358152
AT3G62700	ABCC14	-	3:23190267-23195762	23190267	23195762	5496	4816	1.68312	1.42101e-31	1.43175e-30
AT5G26040	HDA2	-	5:9099157-9101636	9099157	9101636	2480	1366	1.68149	4.38042e-34	4.90717e-33
AT4G26700	ATFIM1	-	4:13463116-13467601	13463116	13467601	4486	2721	1.67987	1.66918e-43	2.78093e-42
AT3G52480	AT3G52480	-	3:19452254-19453162	19452254	19453162	909	909	1.67809	1.98179e-07	4.55723e-07
AT1G72540	AT1G72540	-	1:27314932-27316669	27314932	27316669	1738	1353	1.67781	4.88188e-12	1.59528e-11
AT3G30775	ATPOX	-	3:12448636-12451248	12448636	12451248	2613	1866	1.67651	1.82597e-34	2.07576e-33
AT3G03330	AT3G03330	-	3:783332-786209	783332	786209	2878	1288	1.67609	9.14357e-50	1.94928e-48
AT1G75810	AT1G75810	-	1:28461664-28462366	28461664	28462366	703	703	1.67591	3.20079e-23	2.10898e-22
ATMG00690	ORF240A	-	Mt:203588-204310	203588	204310	723	723	1.67565	6.77431e-09	1.75254e-08
AT3G06455	AT3G06455	-	3:1980542-1982162	1980542	1982162	1621	1488	1.6753	4.09812e-24	2.84182e-23
AT1G43700	VIP1	-	1:16484231-16486241	16484231	16486241	2011	1371	1.67486	2.11458e-47	4.13798e-46
AT1G03210	AT1G03210	-	1:782948-784240	782948	784240	1293	861	1.67299	4.01015e-38	5.36599e-37
AT1G07530	SCL14	-	1:2313582-2316469	2313582	2316469	2888	2787	1.67196	1.18753e-44	2.0723e-43
AT2G25770	AT2G25770	-	2:10992808-10993652	10992808	10993652	845	845	1.6701	8.4254e-14	3.13031e-13
AT2G33590	AT2G33590	-	2:14224268-14226602	14224268	14226602	2335	1557	1.66986	1.06364e-36	1.33761e-35
AT5G03560	AT5G03560	-	5:900460-902762	900460	902762	2303	1895	1.66681	1.6378e-46	3.08033e-45
ATMG00780	TRNS.4	-	Mt:227109-227196	227109	227196	88	88	1.66548	0.00619113	0.00908856
AT5G25560	AT5G25560	-	5:8897871-8901709	8897871	8901709	3839	2784	1.66542	1.56168e-33	1.70107e-32
AT4G22920	ATNYE1	-	4:12016525-12018492	12016525	12018492	1968	1581	1.66541	1.82876e-38	2.4944e-37
AT1G01260	AT1G01260	-	1:108946-111609	108946	111609	2664	2664	1.66457	2.29921e-35	2.74075e-34
AT5G08210	MIR834A	AT5G08230	5:2641426-2641674	2641426	2641674	249	249	1.6626	6.29556e-24	4.32839e-23
AT4G16540	AT4G16540	-	4:9316023-9317153	9316023	9317153	1131	699	1.66152	9.33552e-06	1.84714e-05
AT3G17950	AT3G17950	-	3:6146241-6147348	6146241	6147348	1108	1108	1.66084	7.40583e-13	2.56411e-12
AT3G27030	AT3G27030	-	3:9972508-9974225	9972508	9974225	1718	429	1.66075	1.95209e-34	2.21616e-33
AT5G61380	PRR1	-	5:24675064-24678550	24675064	24678550	3487	2707	1.66038	9.63031e-47	1.83779e-45
AT5G65210	TGA1	-	5:26057623-26061104	26057623	26061104	3482	2382	1.65992	2.90872e-33	3.14205e-32
AT2G26470	AT2G26470	-	2:11259153-11262494	11259153	11262494	3342	1759	1.65915	6.68986e-55	1.70541e-53
AT3G19860	bHLH121	-	3:6903833-6906128	6903833	6906128	2296	1367	1.65814	1.011e-42	1.62828e-41
AT1G61620	AT1G61620	-	1:22737543-22739430	22737543	22739430	1888	1264	1.65786	9.99788e-43	1.61483e-41
AT4G38545	AT4G38545	-	4:18022983-18025287	18022983	18025287	2305	1787	1.65673	4.97421e-38	6.63502e-37
AT2G30600	AT2G30600	-	2:13036876-13041684	13036876	13041684	4809	3134	1.65659	1.7914e-41	2.75163e-40
AT5G66900	AT5G66900	-	5:26714764-26717788	26714764	26717788	3025	2628	1.65594	8.13722e-13	2.81042e-12
AT3G63500	AT3G63500	-	3:23446230-23450198	23446230	23450198	3969	3705	1.65498	8.62664e-34	9.50053e-33
AT5G22290	anac089	-	5:7375923-7377644	7375923	7377644	1722	1290	1.65395	3.84824e-43	6.27545e-42
AT2G02180	TOM3	-	2:560864-563233	560864	563233	2370	1296	1.65291	3.00221e-51	6.73091e-50
AT1G51200	AT1G51200	-	1:18984419-18986653	18984419	18986653	2235	1304	1.65075	3.37155e-35	3.99372e-34
AT1G53785	AT1G53785	AT1G53780	1:20077798-20079002	20077798	20079002	1205	1114	1.65014	1.1472e-09	3.15391e-09
AT5G35525	AT5G35525	-	5:13707084-13707955	13707084	13707955	872	596	1.64823	0.000127682	0.000226169
AT5G48930	HCT	-	5:19836299-19838162	19836299	19838162	1864	1727	1.64364	7.10108e-39	9.82829e-38
AT2G45920	AT2G45920	-	2:18899084-18901303	18899084	18901303	2220	1688	1.64311	2.05088e-35	2.44818e-34
AT3G49300	AT3G49300	-	3:18276770-18277605	18276770	18277605	836	474	1.64269	0.000201244	0.000349273
AT1G05340	AT1G05340	-	1:1558844-1559903	1558844	1559903	1060	711	1.64255	5.74236e-19	2.94906e-18
AT2G30790	PSBP-2	-	2:13118937-13120090	13118937	13120090	1154	901	1.642	1.31777e-08	3.33123e-08
AT2G35310	AT2G35310	-	2:14864855-14866598	14864855	14866598	1744	1149	1.64077	1.72533e-52	4.02823e-51
AT5G06980	AT5G06980	-	5:2167468-2169391	2167468	2169391	1924	1369	1.64062	3.12888e-42	4.9544e-41
AT4G16670	AT4G16670	-	4:9385219-9387754	9385219	9387754	2536	1581	1.63931	1.07747e-33	1.18277e-32
AT5G58800	AT5G58800	-	5:23745883-23747274	23745883	23747274	1392	908	1.63843	4.56739e-22	2.80931e-21
AT3G17225	AT3G17225	-	3:5884374-5884931	5884374	5884931	558	558	1.63828	1.24423e-11	3.96035e-11
AT4G38540	AT4G38540	-	4:18023121-18025027	18023121	18025027	1907	1490	1.63823	1.29343e-33	1.41433e-32
AT3G01400	AT3G01400	-	3:151762-153217	151762	153217	1456	1456	1.63758	1.16906e-30	1.1199e-29
AT4G21350	B80	-	4:11356143-11357267	11356143	11357267	1125	1125	1.63722	2.30193e-31	2.28667e-30
AT2G36950	AT2G36950	-	2:15515133-15516931	15515133	15516931	1799	1421	1.63559	1.14978e-34	1.32038e-33
AT1G09970	LRR.XI-23	-	1:3252240-3255693	3252240	3255693	3454	3367	1.63509	4.43511e-35	5.21441e-34
AT5G64395	AT5G64395	-	5:25748202-25748297	25748202	25748297	96	96	1.63412	5.32476e-06	1.07659e-05
AT4G25690	AT4G25690	AT4G25692	4:13090209-13091798	13090209	13091798	1590	1590	1.6339	4.52573e-37	5.79917e-36
AT4G25692	CPuORF13	AT4G25690	4:13090209-13091797	13090209	13091797	1589	1589	1.6339	4.53083e-37	5.80132e-36
AT5G57565	AT5G57565	-	5:23310284-23311564	23310284	23311564	1281	1188	1.63362	4.00969e-27	3.23354e-26
AT4G26050	PIRL8	-	4:13210459-13213477	13210459	13213477	3019	1543	1.63295	1.07187e-35	1.29411e-34
AT4G15780	ATVAMP724	-	4:8979889-8981768	8979889	8981768	1880	934	1.63226	1.81106e-31	1.81288e-30
AT2G06005	FIP1	-	2:2332547-2336156	2332547	2336156	3610	1238	1.63123	9.90264e-51	2.19114e-49
AT1G56460	AT1G56460	AT1G56470	1:21146239-21149805	21146239	21149805	3567	2166	1.63116	2.47141e-44	4.24276e-43
AT5G23320	ICMTA	-	5:7853368-7853961	7853368	7853961	594	594	1.63017	1.55051e-05	3.00567e-05
AT5G61640	PMSR1	-	5:24775035-24776390	24775035	24776390	1356	924	1.62958	2.69338e-34	3.03736e-33
AT3G51920	CML9	-	3:19268043-19269479	19268043	19269479	1437	756	1.62811	8.61619e-08	2.04209e-07
AT4G17440	AT4G17440	-	4:9727740-9729263	9727740	9729263	1524	1066	1.62769	1.4709e-23	9.87228e-23
AT5G03240	UBQ3	-	5:771725-773515	771725	773515	1791	1791	1.62745	5.27654e-34	5.88379e-33
AT3G06380	ATTLP9	-	3:1936124-1938221	1936124	1938221	2098	1596	1.62614	1.29014e-45	2.34316e-44
AT1G75800	AT1G75800	-	1:28458782-28460854	28458782	28460854	2073	1507	1.62541	9.08079e-28	7.57941e-27
AT5G28340	AT5G28340	-	5:10314118-10317160	10314118	10317160	3043	1308	1.6249	1.70123e-24	1.21147e-23
AT2G26190	AT2G26190	-	2:11147639-11150510	11147639	11150510	2872	2022	1.62424	4.3283e-38	5.78714e-37
AT1G55152	AT1G55152	-	1:20577424-20578292	20577424	20578292	869	869	1.62271	3.21276e-18	1.56857e-17
AT2G07777	AT2G07777	-	2:3250757-3251545	3250757	3251545	789	789	1.62257	1.68831e-08	4.23378e-08
AT4G26270	PFK3	-	4:13300795-13304347	13300795	13304347	3553	2086	1.62228	5.07767e-32	5.2154e-31
AT4G36720	HVA22K	-	4:17307769-17309867	17307769	17309867	2099	802	1.62184	7.32288e-29	6.43585e-28
AT2G28120	AT2G28120	-	2:11985687-11987738	11985687	11987738	2052	2052	1.62096	9.48171e-11	2.83664e-10
AT2G14520	AT2G14520	-	2:6182193-6184648	6182193	6184648	2456	1441	1.62079	5.6372e-39	7.86004e-38
AT1G72680	ATCAD1	-	1:27359232-27361016	27359232	27361016	1785	1322	1.62063	1.31943e-36	1.65192e-35
AT4G15236	AT4G15236	-	4:8696683-8702727	8696683	8702727	6045	4167	1.62038	9.43653e-18	4.50076e-17
AT5G12390	FIS1B	-	5:4010443-4012039	4010443	4012039	1597	1098	1.61971	1.67262e-39	2.3792e-38
AT2G07677	AT2G07677	-	2:3278376-3280384	3278376	3280384	2009	2009	1.61963	3.56119e-06	7.33337e-06
AT2G43210	AT2G43210	-	2:17960700-17963727	17960700	17963727	3028	1865	1.61813	5.14013e-45	9.07267e-44
AT1G72690	AT1G72690	-	1:27361154-27361919	27361154	27361919	766	507	1.61671	3.18348e-12	1.05454e-11
AT2G13665	AT2G13665	-	2:5692148-5693016	5692148	5693016	869	869	1.61625	3.77902e-23	2.48032e-22
AT2G13660	AT2G13660	-	2:5692097-5693016	5692097	5693016	920	856	1.61625	3.79068e-23	2.48701e-22
AT5G08139	AT5G08139	-	5:2616345-2617881	2616345	2617881	1537	1537	1.61597	5.84269e-40	8.51112e-39
ATMG00590	ORF313	-	Mt:169796-170737	169796	170737	942	942	1.61573	1.58933e-05	3.07845e-05
AT2G07718	AT2G07718	-	2:3426263-3427204	3426263	3427204	942	942	1.61573	1.59107e-05	3.08147e-05
AT1G11360	AT1G11360	-	1:3821443-3823088	3821443	3823088	1646	1424	1.61531	2.09387e-48	4.25997e-47
AT3G09790	UBQ8	-	3:3003862-3006192	3003862	3006192	2331	2331	1.61497	1.09091e-11	3.48477e-11
AT5G03200	AT5G03200	-	5:760319-761803	760319	761803	1485	1281	1.61394	1.34102e-36	1.67771e-35
AT3G03150	AT3G03150	-	3:727554-729504	727554	729504	1951	692	1.61384	1.75052e-30	1.6628e-29
AT2G33580	AT2G33580	-	2:14219623-14221861	14219623	14221861	2239	2239	1.61257	2.2881e-20	1.28674e-19
AT3G19910	AT3G19910	-	3:6926308-6929567	6926308	6929567	3260	1455	1.61241	5.29233e-44	9.00334e-43
AT5G65710	HSL2	-	5:26292372-26295440	26292372	26295440	3069	2982	1.61007	1.83877e-30	1.74565e-29
AT5G16880	AT5G16880	-	5:5548914-5551463	5548914	5551463	2550	1655	1.60969	2.89341e-40	4.26626e-39
AT3G24500	MBF1C	-	3:8918679-8919683	8918679	8919683	1005	744	1.60966	7.73058e-20	4.20082e-19
AT3G24210	AT3G24210	-	3:8753474-8756065	8753474	8756065	2592	2329	1.6088	4.75382e-12	1.55463e-11
AT5G08430	AT5G08430	-	5:2716700-2720212	2716700	2720212	3513	2053	1.60844	1.27572e-46	2.41275e-45
AT1G51680	4CL.1	-	1:19158752-19161552	19158752	19161552	2801	2258	1.60823	7.00788e-06	1.39989e-05
AT4G33670	AT4G33670	-	4:16169523-16171561	16169523	16171561	2039	1222	1.60715	5.61883e-41	8.49196e-40
AT3G48560	CSR1	-	3:18001312-18003581	18001312	18003581	2270	2270	1.60655	3.20851e-33	3.45706e-32
AT1G50520	CYP705A27	-	1:18719378-18721219	18719378	18721219	1842	1754	1.6051	1.14976e-13	4.22721e-13
AT4G34180	AT4G34180	-	4:16369357-16371430	16369357	16371430	2074	1419	1.60395	1.35304e-38	1.85299e-37
AT5G05880	AT5G05880	-	5:1769648-1771515	1769648	1771515	1868	1356	1.60189	1.69774e-46	3.18952e-45
AT1G05890	ATARI5	-	1:1779256-1784529	1779256	1784529	5274	2523	1.60139	2.39313e-39	3.38536e-38
AT5G47020	AT5G47020	-	5:19081458-19090023	19081458	19090023	8566	4894	1.60005	5.82425e-32	5.96774e-31
AT3G48000	ALDH2B4	-	3:17716867-17720020	17716867	17720020	3154	2009	1.59665	7.03983e-32	7.18716e-31
AT4G01020	AT4G01020	-	4:439086-445168	439086	445168	6083	5489	1.59637	5.47665e-39	7.64247e-38
AT1G01640	AT1G01640	-	1:230994-232508	230994	232508	1515	994	1.59452	1.44283e-08	3.63542e-08
AT4G39930	AT4G39930	-	4:18518343-18518983	18518343	18518983	641	641	1.59354	4.81188e-06	9.76587e-06
AT4G01026	PYL7	-	4:447052-448511	447052	448511	1460	1166	1.59324	2.03595e-19	1.07561e-18
AT2G03520	ATUPS4	-	2:1069491-1071382	1069491	1071382	1892	1322	1.59309	3.88655e-39	5.45503e-38
AT3G24740	AT3G24740	-	3:9031096-9033796	9031096	9033796	2701	1813	1.592	1.78997e-51	4.05607e-50
AT3G01770	ATBET10	-	3:275411-278785	275411	278785	3375	2288	1.59198	3.13084e-38	4.2194e-37
AT2G42750	AT2G42750	-	2:17793307-17795680	17793307	17795680	2374	1393	1.59174	3.61886e-35	4.28367e-34
AT4G27657	AT4G27657	-	4:13813044-13813516	13813044	13813516	473	473	1.59132	7.49972e-14	2.79559e-13
AT4G18700	CIPK12	-	4:10288798-10290850	10288798	10290850	2053	2053	1.58995	9.68202e-36	1.17063e-34
AT1G70590	AT1G70590	-	1:26618321-26620388	26618321	26620388	2068	1367	1.58993	3.08523e-30	2.89168e-29
AT1G07310	AT1G07310	-	1:2247509-2248961	2247509	2248961	1453	1453	1.58985	9.70767e-35	1.12165e-33
AT4G28650	AT4G28650	-	4:14143984-14147537	14143984	14147537	3554	3474	1.58943	3.47073e-47	6.76053e-46
AT3G03240	AT3G03240	-	3:746655-748600	746655	748600	1946	1243	1.58929	2.63654e-08	6.51039e-08
AT2G44310	AT2G44310	-	2:18309212-18309826	18309212	18309826	615	615	1.58877	3.26633e-28	2.78816e-27
AT5G43930	AT5G43930	-	5:17676816-17681100	17676816	17681100	4285	2931	1.58874	9.74191e-48	1.93093e-46
AT3G03230	AT3G03230	-	3:744389-746009	744389	746009	1621	1091	1.58719	0.000364073	0.000613384
AT1G71340	AT1G71340	-	1:26885170-26888338	26885170	26888338	3169	2390	1.58674	1.13614e-39	1.62979e-38
AT5G18120	ATAPRL7	-	5:5990956-5993936	5990956	5993936	2981	1539	1.58621	5.24176e-31	5.1022e-30
AT5G26340	MSS1	-	5:9243511-9247066	9243511	9247066	3556	1993	1.58587	3.5358e-22	2.18672e-21
AT5G37260	RVE2	-	5:14751344-14753088	14751344	14753088	1745	980	1.58583	1.36491e-41	2.11186e-40
AT4G29990	AT4G29990	-	4:14665691-14670030	14665691	14670030	4340	3334	1.58453	1.20644e-23	8.15551e-23
AT2G07798	AT2G07798	-	2:3357619-3361102	3357619	3361102	3484	1480	1.58429	1.51085e-07	3.51149e-07
AT5G13800	PPH	-	5:4451837-4454623	4451837	4454623	2787	1853	1.58394	3.13908e-38	4.22714e-37
AT2G18915	ADO2	-	2:8194572-8197483	8194572	8197483	2912	2284	1.58329	4.02042e-41	6.10346e-40
AT3G10030	AT3G10030	-	3:3092023-3094945	3092023	3094945	2923	2272	1.58317	1.26743e-37	1.66437e-36
AT5G63790	NAC102	-	5:25526509-25528013	25526509	25528013	1505	1317	1.5822	6.9429e-16	2.95431e-15
AT5G66910	AT5G66910	-	5:26718232-26721256	26718232	26721256	3025	2677	1.5814	1.1909e-31	1.20349e-30
AT3G03370	AT3G03370	-	3:797254-799148	797254	799148	1895	1171	1.5808	1.24513e-05	2.43404e-05
AT4G38440	AT4G38440	-	4:17989067-17994723	17989067	17994723	5657	4620	1.57862	3.24497e-29	2.90461e-28
AT3G27980	AT3G27980	-	3:10393904-10395861	10393904	10395861	1958	1494	1.57793	8.19915e-08	1.94652e-07
AT1G72650	TRFL6	-	1:27349467-27353742	27349467	27353742	4276	2421	1.57757	2.11279e-37	2.74891e-36
AT5G13010	EMB3011	-	5:4122410-4128861	4122410	4128861	6452	4306	1.57687	1.90945e-31	1.91024e-30
AT1G64107	AT1G64107	-	1:23796203-23796555	23796203	23796555	353	276	1.57616	0.00502566	0.00744916
AT4G35240	AT4G35240	-	4:16760949-16767087	16760949	16767087	6139	3221	1.57604	1.57198e-40	2.34027e-39
AT1G13820	AT1G13820	-	1:4735547-4737808	4735547	4737808	2262	1286	1.57457	5.1297e-22	3.14489e-21
AT3G19920	AT3G19920	-	3:6929711-6931806	6929711	6931806	2096	1415	1.57442	9.32791e-34	1.02528e-32
AT4G35580	NTL9	-	4:16888405-16890877	16888405	16890877	2473	1867	1.57439	7.39241e-39	1.02231e-37
AT1G23050	AT1G23050	-	1:8168443-8169267	8168443	8169267	825	825	1.57286	3.12683e-19	1.63661e-18
AT1G23052	AT1G23052	-	1:8168443-8169267	8168443	8169267	825	825	1.57286	3.12923e-19	1.63685e-18
AT2G20230	AT2G20230	-	2:8725541-8727742	8725541	8727742	2202	1388	1.57273	5.83326e-30	5.3956e-29
AT3G06290	AT3G06290	-	3:1899042-1907297	1899042	1907297	8256	5175	1.57086	2.01016e-31	2.00743e-30
AT5G02100	UNE18	-	5:413520-416225	413520	416225	2706	1690	1.57081	3.53569e-41	5.37241e-40
AT4G16680	AT4G16680	-	4:9387393-9390774	9387393	9390774	3382	2962	1.56975	4.18437e-27	3.36959e-26
AT1G65980	TPX1	-	1:24559306-24560936	24559306	24560936	1631	890	1.56944	1.09108e-29	9.94548e-29
AT1G60140	ATTPS10	-	1:22176934-22180875	22176934	22180875	3942	3146	1.56657	3.4854e-45	6.20373e-44
AT1G13990	AT1G13990	-	1:4794756-4796597	4794756	4796597	1842	1164	1.56616	5.0438e-38	6.71726e-37
AT1G75750	GASA1	-	1:28441526-28442429	28441526	28442429	904	729	1.56583	3.40195e-11	1.05101e-10
AT4G14305	AT4G14305	-	4:8235093-8236715	8235093	8236715	1623	910	1.56553	4.02587e-08	9.78826e-08
AT5G01160	AT5G01160	-	5:54010-55856	54010	55856	1847	1404	1.56532	3.7392e-35	4.41994e-34
AT1G65080	AT1G65080	-	1:24176582-24180871	24176582	24180871	4290	1757	1.56504	8.91997e-44	1.50537e-42
AT3G17020	AT3G17020	-	3:5802536-5804157	5802536	5804157	1622	778	1.56364	1.15535e-41	1.79418e-40
AT1G15170	AT1G15170	-	1:5220641-5222973	5220641	5222973	2333	1712	1.56361	2.76068e-38	3.72648e-37
AT5G65750	AT5G65750	-	5:26303693-26308189	26303693	26308189	4497	3474	1.56311	7.74868e-30	7.11676e-29
AT3G01350	AT3G01350	-	3:135024-137460	135024	137460	2437	1692	1.56243	8.46571e-15	3.36225e-14
AT2G02850	ARPN	-	2:826404-827812	826404	827812	1409	708	1.56233	5.01313e-26	3.8589e-25
AT4G08330	AT4G08330	-	4:5255120-5256705	5255120	5256705	1586	939	1.56113	6.84868e-18	3.28686e-17
AT3G02990	ATHSFA1E	-	3:673472-676403	673472	676403	2932	1864	1.56009	1.43482e-37	1.87836e-36
AT3G01210	AT3G01210	-	3:71626-73220	71626	73220	1595	1032	1.55979	5.51408e-25	4.03255e-24
AT2G18700	TPS11	-	2:8109043-8112010	8109043	8112010	2968	2800	1.55971	1.18371e-38	1.62504e-37
AT4G21680	NRT1.8	-	4:11517353-11519765	11517353	11519765	2413	2146	1.55952	1.41638e-28	1.23012e-27
AT5G47090	AT5G47090	-	5:19127259-19128769	19127259	19128769	1511	1224	1.55929	2.81807e-35	3.34747e-34
AT5G17580	AT5G17580	-	5:5795302-5797178	5795302	5797178	1877	1794	1.55917	1.22113e-37	1.60482e-36
AT2G02710	PLPC	-	2:758693-761013	758693	761013	2321	1724	1.5584	1.62593e-36	2.02517e-35
AT4G31860	AT4G31860	-	4:15406439-15409000	15406439	15409000	2562	1625	1.5584	5.14877e-35	6.03136e-34
AT1G65660	SMP1	-	1:24418107-24421292	24418107	24421292	3186	1857	1.55716	1.84959e-35	2.21258e-34
AT3G03490	PEX19-1	-	3:830165-831888	830165	831888	1724	1013	1.55693	1.48608e-44	2.58264e-43
AT5G03830	AT5G03830	-	5:1018338-1020460	1018338	1020460	2123	1282	1.55659	6.32807e-43	1.02897e-41
AT5G48530	AT5G48530	-	5:19666837-19668830	19666837	19668830	1994	1203	1.55629	9.8018e-26	7.4368e-25
AT2G24100	AT2G24100	-	2:10244886-10246919	10244886	10246919	2034	1640	1.55615	3.03122e-45	5.40669e-44
AT1G80160	AT1G80160	-	1:30151003-30152190	30151003	30152190	1188	963	1.55494	1.29023e-18	6.4462e-18
AT5G64280	DiT2.2	-	5:25711069-25713473	25711069	25713473	2405	1973	1.55491	3.72269e-31	3.6551e-30
AT5G16550	AT5G16550	-	5:5405350-5406887	5405350	5406887	1538	1172	1.55446	2.75146e-31	2.72044e-30
AT2G44980	AT2G44980	-	2:18552192-18556669	18552192	18556669	4478	2789	1.55379	2.31363e-30	2.18664e-29
AT4G01870	AT4G01870	-	4:808376-810446	808376	810446	2071	2071	1.55376	1.80864e-12	6.09251e-12
AT3G53180	AT3G53180	-	3:19706894-19711439	19706894	19711439	4546	2984	1.55368	5.30882e-33	5.66241e-32
AT3G04880	DRT102	-	3:1346273-1347377	1346273	1347377	1105	1105	1.5535	2.46312e-34	2.78698e-33
AT5G38160	AT5G38160	-	5:15225767-15226208	15225767	15226208	442	442	1.55342	0.000575559	0.000951415
AT3G62260	AT3G62260	-	3:23038290-23040584	23038290	23040584	2295	1574	1.55246	4.42492e-18	2.1443e-17
AT1G27730	STZ	-	1:9648141-9649073	9648141	9649073	933	933	1.55215	7.45093e-14	2.77863e-13
AT2G43535	AT2G43535	-	2:18070973-18071676	18070973	18071676	704	567	1.55124	4.05352e-10	1.15687e-09
AT1G27980	ATDPL1	-	1:9748737-9752769	9748737	9752769	4033	1861	1.55057	3.27999e-39	4.63056e-38
AT5G47160	AT5G47160	-	5:19156731-19157978	19156731	19157978	1248	1248	1.54993	2.26378e-12	7.58492e-12
AT2G04940	AT2G04940	-	2:1736485-1740388	1736485	1740388	3904	1499	1.5489	1.44575e-39	2.06516e-38
AT3G58490	AT3G58490	-	3:21632812-21635106	21632812	21635106	2295	1553	1.54718	3.88892e-37	4.99452e-36
AT3G57030	AT3G57030	-	3:21101457-21103293	21101457	21103293	1837	1410	1.54448	2.51175e-41	3.83722e-40
AT3G50970	LTI30	-	3:18940777-18941554	18940777	18941554	778	778	1.54432	2.96172e-13	1.05677e-12
AT1G67340	AT1G67340	-	1:25230265-25231840	25230265	25231840	1576	1416	1.54342	2.00753e-31	2.00599e-30
AT5G64840	GCN5	-	5:25916723-25919810	25916723	25919810	3088	2429	1.54331	6.89424e-33	7.29823e-32
AT5G61510	AT5G61510	-	5:24736945-24738998	24736945	24738998	2054	1383	1.54288	2.35891e-37	3.05971e-36
AT1G03090	MCCA	-	1:739679-744184	739679	744184	4506	2606	1.54259	2.13796e-37	2.77951e-36
AT3G14360	AT3G14360	-	3:4791589-4793684	4791589	4793684	2096	1714	1.54191	1.60455e-36	2.00149e-35
AT3G52570	AT3G52570	-	3:19501130-19502999	19501130	19502999	1870	1227	1.54158	1.43486e-46	2.70466e-45
AT1G04300	AT1G04300	-	1:1148597-1154652	1148597	1154652	6056	3845	1.54155	8.36199e-38	1.10841e-36
AT4G14385	AT4G14385	-	4:8286986-8288800	8286986	8288800	1815	1042	1.54142	2.26331e-41	3.4608e-40
AT5G14120	AT5G14120	-	5:4555949-4558710	4555949	4558710	2762	2362	1.54088	1.15058e-41	1.78841e-40
AT5G12380	ANNAT8	-	5:4009223-4010687	4009223	4010687	1465	951	1.53865	2.31034e-10	6.72869e-10
AT3G10550	MTM1	-	3:3292899-3298522	3292899	3298522	5624	2904	1.53857	2.04062e-43	3.38311e-42
AT5G12280	AT5G12280	-	5:3971800-3973644	3971800	3973644	1845	1632	1.53854	3.44211e-14	1.30991e-13
AT1G15060	AT1G15060	-	1:5183607-5186974	5183607	5186974	3368	2301	1.53739	6.46795e-27	5.16917e-26
AT2G25625	AT2G25625	-	2:10906428-10907288	10906428	10907288	861	782	1.53676	3.73429e-08	9.10681e-08
AT2G14260	PIP	-	2:6041253-6043974	6041253	6043974	2722	1607	1.53602	1.05485e-46	2.00397e-45
AT5G58690	PLC5	-	5:23709529-23712131	23709529	23712131	2603	1985	1.53582	3.76598e-09	9.92939e-09
AT5G11600	AT5G11600	-	5:3733654-3735099	3733654	3735099	1446	974	1.53559	8.81221e-31	8.47043e-30
AT3G23640	HGL1	-	3:8501810-8509584	8501810	8509584	7775	3430	1.53546	4.15799e-29	3.69655e-28
AT1G11180	AT1G11180	-	1:3745774-3748521	3745774	3748521	2748	1184	1.53528	5.93572e-44	1.00675e-42
AT1G04310	ERS2	-	1:1154764-1157711	1154764	1157711	2948	2470	1.53427	1.92844e-17	9.01233e-17
AT4G32440	AT4G32440	-	4:15656681-15660223	15656681	15660223	3543	2663	1.53347	3.86113e-35	4.56088e-34
AT4G14780	AT4G14780	-	4:8492832-8494591	8492832	8494591	1760	1363	1.53319	3.57349e-10	1.02488e-09
AT3G04700	AT3G04700	AT3G04710	3:1276668-1277824	1276668	1277824	1157	1073	1.53303	4.64072e-11	1.41947e-10
AT4G36010	AT4G36010	-	4:17039063-17041141	17039063	17041141	2079	1357	1.53274	7.83722e-23	5.05182e-22
AT2G17840	ERD7	-	2:7755605-7757852	7755605	7757852	2248	1731	1.53128	1.06187e-41	1.65205e-40
AT1G08980	ATAMI1	-	1:2884411-2886620	2884411	2886620	2210	1512	1.53125	1.87327e-24	1.32896e-23
AT4G20170	AT4G20170	-	4:10896679-10899141	10896679	10899141	2463	1993	1.531	2.08632e-36	2.58719e-35
AT2G30140	AT2G30140	-	2:12872134-12873820	12872134	12873820	1687	1563	1.5304	5.4266e-17	2.46263e-16
AT5G10650	AT5G10650	-	5:3364972-3368127	3364972	3368127	3156	2024	1.53024	1.01948e-30	9.78273e-30
AT5G10370	AT5G10370	-	5:3261245-3267344	3261245	3267344	6100	5484	1.52902	7.56628e-40	1.09559e-38
AT1G45145	ATTRX5	-	1:17074942-17076330	17074942	17076330	1389	753	1.52874	4.95687e-27	3.97465e-26
AT4G36648	AT4G36648	-	4:17280528-17282730	17280528	17282730	2203	2105	1.52863	3.07186e-33	3.31194e-32
AT4G18220	AT4G18220	-	4:10078768-10080109	10078768	10080109	1342	1035	1.52841	6.36199e-13	2.21538e-12
AT1G53190	AT1G53190	-	1:19837110-19840227	19837110	19840227	3118	2036	1.52801	3.07596e-43	5.05012e-42
AT3G20550	DDL	-	3:7174464-7177942	7174464	7177942	3479	1281	1.52727	1.25235e-39	1.79192e-38
AT1G15230	AT1G15230	-	1:5242198-5243227	5242198	5243227	1030	1030	1.52614	4.98948e-21	2.9073e-20
AT3G04184	AT3G04184	-	3:1100085-1100246	1100085	1100246	162	162	1.52608	3.14041e-12	1.04068e-11
AT5G36100	AT5G36100	-	5:14191711-14194176	14191711	14194176	2466	1185	1.52421	4.90026e-35	5.74822e-34
AT1G04100	IAA10	-	1:1059506-1061191	1059506	1061191	1686	1254	1.52212	1.27431e-07	2.98136e-07
AT5G04090	AT5G04090	-	5:1105410-1108266	1105410	1108266	2857	1478	1.52187	1.0236e-35	1.23672e-34
AT4G12570	UPL5	-	4:7445362-7449086	7445362	7449086	3725	3112	1.52088	1.51689e-39	2.16314e-38
AT2G43080	AT-P4H-1	-	2:17915561-17918754	17915561	17918754	3194	1201	1.52045	2.07279e-41	3.17234e-40
AT2G29380	HAI3	-	2:12608702-12610167	12608702	12610167	1466	1285	1.51998	1.98524e-47	3.89388e-46
AT2G07783	AT2G07783	-	2:3297896-3300043	3297896	3300043	2148	2148	1.51808	1.54931e-06	3.29338e-06
AT4G16520	ATG8F	-	4:9306663-9308462	9306663	9308462	1800	934	1.51786	4.02865e-35	4.75212e-34
AT1G12280	AT1G12280	-	1:4174875-4177559	4174875	4177559	2685	2685	1.51778	2.51829e-10	7.31294e-10
AT1G44350	ILL6	-	1:16834210-16838286	16834210	16838286	4077	2019	1.51743	1.674e-35	2.00394e-34
AT1G30320	AT1G30320	-	1:10680246-10682954	10680246	10682954	2709	1734	1.51718	1.56714e-19	8.35756e-19
AT1G32700	AT1G32700	-	1:11827433-11829759	11827433	11829759	2327	1393	1.51582	1.76807e-22	1.11547e-21
AT5G62900	AT5G62900	-	5:25248797-25249942	25248797	25249942	1146	778	1.51568	1.45161e-28	1.26007e-27
AT4G31310	AT4G31310	-	4:15191325-15192596	15191325	15192596	1272	778	1.51491	1.092e-14	4.29766e-14
AT3G48390	AT3G48390	-	3:17920815-17923496	17920815	17923496	2682	2344	1.5141	7.94686e-13	2.74692e-12
AT3G16030	CES101	-	3:5439609-5442802	5439609	5442802	3194	2553	1.51408	4.49085e-19	2.32253e-18
AT4G11320	AT4G11320	-	4:6887254-6889059	6887254	6889059	1806	1430	1.51404	3.69162e-36	4.5314e-35
AT1G21450	SCL1	-	1:7508969-7511801	7508969	7511801	2833	2298	1.51331	1.16652e-36	1.46448e-35
AT1G49530	GGPS6	-	1:18332429-18333689	18332429	18333689	1261	1261	1.51295	2.10801e-11	6.59805e-11
AT4G38740	ROC1	-	4:18083395-18084251	18083395	18084251	857	857	1.51292	4.81201e-21	2.8061e-20
AT2G42170	AT2G42170	-	2:17577714-17580392	17577714	17580392	2679	1402	1.51211	6.12355e-30	5.65176e-29
AT2G18570	AT2G18570	-	2:8063320-8065008	8063320	8065008	1689	1689	1.51143	4.49498e-26	3.46793e-25
AT3G45770	AT3G45770	-	3:16805562-16807856	16805562	16807856	2295	1405	1.51116	9.19787e-45	1.61507e-43
AT2G35680	AT2G35680	-	2:14996713-14999085	14996713	14999085	2373	1800	1.50853	1.24965e-33	1.36822e-32
AT5G07830	AtGUS2	-	5:2503323-2506688	2503323	2506688	3366	1954	1.50842	2.97858e-44	5.10307e-43
AT5G55700	BMY6	-	5:22551747-22554964	22551747	22554964	3218	2006	1.50788	3.83947e-43	6.26718e-42
AT3G28620	AT3G28620	-	3:10727826-10728461	10727826	10728461	636	636	1.5065	0.000163917	0.000287109
AT5G18240	ATMYR1	-	5:6028285-6030802	6028285	6030802	2518	1688	1.50647	1.51824e-13	5.53385e-13
AT2G38830	AT2G38830	-	2:16225777-16226872	16225777	16226872	1096	1096	1.5062	1.09484e-08	2.79059e-08
AT4G25970	PSD3	AT4G25980	4:13184114-13189435	13184114	13189435	5322	2330	1.50599	6.03277e-38	8.00915e-37
AT1G03030	AT1G03030	-	1:701478-703864	701478	703864	2387	1345	1.5057	1.21173e-38	1.66081e-37
AT2G45820	AT2G45820	-	2:18862953-18864691	18862953	18864691	1739	882	1.50536	7.03675e-33	7.44444e-32
AT2G07835	AT2G07835	-	2:3501814-3502294	3501814	3502294	481	387	1.50527	1.10976e-07	2.61118e-07
AT1G23310	GGAT1	-	1:8268404-8271933	8268404	8271933	3530	2098	1.5052	3.13838e-37	4.05213e-36
AT2G26210	AT2G26210	-	2:11157118-11159292	11157118	11159292	2175	1017	1.50365	2.64229e-37	3.42204e-36
AT4G16250	PHYD	-	4:9195602-9199486	9195602	9199486	3885	3495	1.50336	1.09156e-35	1.31696e-34
AT3G29140	AT3G29140	-	3:11105805-11106144	11105805	11106144	340	297	1.50269	2.86241e-08	7.04449e-08
ATMG01280	ORF291	-	Mt:318588-319463	318588	319463	876	876	1.50258	2.77989e-09	7.38816e-09
ATMG00670	ORF275	-	Mt:191055-191882	191055	191882	828	828	1.50204	8.36767e-07	1.82173e-06
AT4G25540	MSH3	-	4:13042557-13048213	13042557	13048213	5657	3487	1.50184	7.2842e-17	3.28274e-16
AT3G29575	AFP3	-	3:11382214-11384004	11382214	11384004	1791	1245	1.50135	5.38964e-19	2.77296e-18
AT3G47160	AT3G47160	-	3:17359988-17362118	17359988	17362118	2131	1265	1.49867	1.65623e-44	2.87244e-43
AT1G18100	E12A11	-	1:6227217-6230188	6227217	6230188	2972	1432	1.49849	4.99109e-32	5.12958e-31
AT2G07669	AT2G07669	-	2:3283224-3283553	3283224	3283553	330	330	1.49849	0.0060916	0.00894685
AT1G75370	AT1G75370	-	1:28276426-28279898	28276426	28279898	3473	2205	1.49848	6.44215e-37	8.19897e-36
AT3G25440	AT3G25440	-	3:9223967-9225710	9223967	9225710	1744	1571	1.49815	1.56291e-28	1.3553e-27
AT3G53280	CYP71B5	-	3:19755704-19757613	19755704	19757613	1910	1689	1.49774	3.98011e-44	6.79831e-43
AT1G30200	AT1G30200	-	1:10625029-10627105	10625029	10627105	2077	1737	1.49693	5.57251e-35	6.50523e-34
AT5G49710	AT5G49710	-	5:20195410-20197353	20195410	20197353	1944	1490	1.49597	2.00585e-33	2.18066e-32
AT4G02005	AT4G02005	-	4:876908-879741	876908	879741	2834	1969	1.49538	8.27504e-13	2.85744e-12
AT4G36600	AT4G36600	-	4:17263666-17265100	17263666	17265100	1435	1194	1.49529	5.40382e-36	6.5996e-35
AT5G51170	AT5G51170	-	5:20793794-20795399	20793794	20795399	1606	1043	1.49506	1.85541e-39	2.63257e-38
AT5G40910	AT5G40910	-	5:16395507-16399129	16395507	16399129	3623	3315	1.4946	2.83527e-42	4.50635e-41
AT1G53780	AT1G53780	AT1G53785	1:20073996-20078228	20073996	20078228	4233	2481	1.49434	1.17621e-30	1.12612e-29
AT5G47580	AT5G47580	-	5:19294846-19297418	19294846	19297418	2573	2573	1.49425	4.41356e-28	3.73542e-27
ATMG00020	RRN26	-	Mt:8848-11415	8848	11415	2568	2568	1.49272	4.39386e-06	8.95436e-06
AT3G01100	HYP1	-	3:34719-38529	34719	38529	3811	2857	1.49213	2.67743e-38	3.61699e-37
AT5G13570	DCP2	-	5:4367299-4370265	4367299	4370265	2967	1667	1.49159	5.05993e-46	9.28952e-45
AT5G23590	AT5G23590	-	5:7953529-7955640	7953529	7955640	2112	1489	1.49072	9.64708e-37	1.215e-35
AT1G60710	ATB2	-	1:22354753-22356761	22354753	22356761	2009	1492	1.49017	3.24985e-38	4.36588e-37
AT3G45640	ATMPK3	-	3:16756770-16758698	16756770	16758698	1929	1483	1.49013	6.64297e-34	7.37832e-33
AT5G41270	AT5G41270	-	5:16507709-16508879	16507709	16508879	1171	931	1.48993	9.63165e-23	6.17791e-22
AT5G57260	CYP71B10	-	5:23198637-23200318	23198637	23200318	1682	1611	1.48988	8.01158e-29	7.02289e-28
AT1G06010	AT1G06010	-	1:1822618-1823997	1822618	1823997	1380	633	1.48837	1.32638e-25	9.99627e-25
AT1G60690	AT1G60690	-	1:22349892-22351668	22349892	22351668	1777	1038	1.48814	6.74486e-19	3.44613e-18
AT4G32650	KC1	-	4:15751322-15754854	15751322	15754854	3533	2206	1.48763	9.31955e-26	7.08043e-25
AT5G37485	AT5G37485	-	5:14886193-14886979	14886193	14886979	787	616	1.48666	4.23825e-06	8.64765e-06
AT2G11240	AT2G11240	-	2:4477686-4483748	4477686	4483748	6063	6063	1.48604	3.13856e-21	1.84916e-20
AT2G07751	AT2G07751	-	2:3270008-3270364	3270008	3270364	357	357	1.4859	0.00286177	0.00437589
AT4G06748	AT4G06748	-	4:4077798-4079408	4077798	4079408	1611	1611	1.48511	9.41318e-13	3.23855e-12
AT4G39404	AT4G39404	-	4:18329734-18330012	18329734	18330012	279	279	1.48412	6.20521e-05	0.000113786
ATMG00640	ORF25	-	Mt:188084-188662	188084	188662	579	579	1.484	2.58385e-08	6.38214e-08
AT4G32670	AT4G32670	-	4:15759243-15762925	15759243	15762925	3683	2945	1.48357	9.06027e-40	1.30856e-38
AT2G42330	AT2G42330	-	2:17630729-17634299	17630729	17634299	3571	3309	1.48331	1.69059e-20	9.58358e-20
AT1G69800	AT1G69800	-	1:26274230-26276329	26274230	26276329	2100	1754	1.48309	3.0954e-36	3.80784e-35
AT5G17400	ER-ANT1	-	5:5728789-5730376	5728789	5730376	1588	1296	1.48082	1.67093e-38	2.28096e-37
AT3G54363	AT3G54363	-	3:20132239-20132535	20132239	20132535	297	297	1.48075	1.58797e-18	7.9081e-18
AT5G24318	AT5G24318	-	5:8281976-8284001	8281976	8284001	2026	1818	1.48025	1.04709e-10	3.12373e-10
ATMG00990	NAD3	ATMG01000	Mt:260647-261006	260647	261006	360	360	1.47984	0.00281168	0.0043028
AT5G63200	AT5G63200	-	5:25349011-25353039	25349011	25353039	4029	2122	1.47948	1.59398e-44	2.76731e-43
AT2G07695	AT2G07695	-	2:3346951-3347826	3346951	3347826	876	876	1.47936	6.12888e-08	1.468e-07
AT3G59530	LAP3	AT3G59520	3:21993253-21995308	21993253	21995308	2056	1546	1.47885	2.14659e-15	8.8731e-15
AT3G03440	AT3G03440	-	3:815644-818834	815644	818834	3191	1558	1.47869	9.40514e-28	7.84241e-27
AT5G38140	NF-YC12	-	5:15220208-15222272	15220208	15222272	2065	890	1.4786	4.45744e-23	2.91768e-22
AT5G11840	AT5G11840	-	5:3813449-3814805	3813449	3814805	1357	959	1.47818	1.71636e-24	1.22122e-23
AT1G79440	SSADH	-	1:29882210-29887412	29882210	29887412	5203	2039	1.47808	7.51723e-29	6.5998e-28
AT1G04830	AT1G04830	-	1:1358574-1362019	1358574	1362019	3446	1973	1.47807	3.83393e-46	7.07709e-45
AT4G29900	ACA10	-	4:14610883-14619573	14610883	14619573	8691	3762	1.47764	1.91774e-29	1.72944e-28
AT2G42400	VOZ2	-	2:17654232-17656839	17654232	17656839	2608	1834	1.47683	1.08984e-44	1.90576e-43
AT4G31420	AT4G31420	-	4:15245813-15247927	15245813	15247927	2115	1556	1.47653	8.11254e-47	1.55341e-45
AT5G20320	DCL4	-	5:6859218-6869307	6859218	6869307	10090	5701	1.47643	9.04685e-29	7.91401e-28
AT2G07675	AT2G07675	-	2:3270410-3270787	3270410	3270787	378	378	1.47639	0.00532149	0.00786079
AT5G02880	UPL4	-	5:662064-669107	662064	669107	7044	4923	1.47631	5.90983e-20	3.23531e-19
ATMG00980	RPSL2	-	Mt:260224-260601	260224	260601	378	378	1.47593	0.00540654	0.00797947
AT1G17780	AT1G17780	-	1:6123701-6125269	6123701	6125269	1569	1477	1.47565	7.81324e-19	3.96566e-18
AT1G02380	AT1G02380	-	1:477000-478971	477000	478971	1972	1121	1.475	1.61529e-13	5.8636e-13
AT5G06760	LEA4-5	-	5:2089492-2090430	2089492	2090430	939	856	1.47491	6.76696e-25	4.92452e-24
AT2G17820	ATHK1	-	2:7742924-7748220	7742924	7748220	5297	4040	1.47488	2.67274e-22	1.66758e-21
AT4G37420	AT4G37420	-	4:17593123-17594889	17593123	17594889	1767	1767	1.47474	2.69652e-06	5.59842e-06
AT1G60200	AT1G60200	-	1:22200733-22205288	22200733	22205288	4556	2896	1.47439	4.47558e-32	4.60816e-31
AT5G38895	AT5G38895	-	5:15571254-15573526	15571254	15573526	2273	1281	1.47406	1.69349e-21	1.01292e-20
AT4G18930	AT4G18930	-	4:10370704-10372045	10370704	10372045	1342	799	1.47159	9.8315e-23	6.29894e-22
AT2G31955	CNX2	-	2:13584139-13586700	13584139	13586700	2562	1716	1.47137	4.67245e-38	6.24235e-37
AT3G42148	AT3G42148	-	3:14308062-14308169	14308062	14308169	108	108	1.47103	0.00787927	0.0114228
AT1G17090	AT1G17090	-	1:5842216-5844283	5842216	5844283	2068	856	1.4709	2.02038e-16	8.87364e-16
AT5G14530	AT5G14530	-	5:4684620-4686909	4684620	4686909	2290	1199	1.47027	9.36491e-42	1.46101e-40
AT2G19250	AT2G19250	-	2:8352686-8355700	8352686	8355700	3015	3015	1.47004	2.0679e-31	2.06266e-30
AT1G64560	AT1G64560	-	1:23973729-23974177	23973729	23974177	449	449	1.46854	1.98998e-12	6.69138e-12
AT3G47610	AT3G47610	-	3:17549121-17551420	17549121	17551420	2300	1500	1.46822	4.49377e-44	7.65252e-43
AT1G07300	AT1G07300	-	1:2245758-2246492	2245758	2246492	735	735	1.4677	1.16165e-06	2.49755e-06
AT3G51370	AT3G51370	-	3:19069363-19072195	19069363	19072195	2833	1892	1.46767	1.14555e-32	1.20439e-31
AT5G04340	C2H2	-	5:1216131-1217106	1216131	1217106	976	976	1.46762	3.99841e-14	1.51548e-13
AT5G51390	AT5G51390	-	5:20877967-20878464	20877967	20878464	498	498	1.46761	3.36466e-05	6.32958e-05
AT3G45650	NAXT1	-	3:16759253-16761266	16759253	16761266	2014	1677	1.46738	1.0822e-09	2.98441e-09
AT3G01920	AT3G01920	-	3:317432-319121	317432	319121	1690	1061	1.46738	7.15996e-35	8.31824e-34
AT5G64850	AT5G64850	-	5:25921409-25923358	25921409	25923358	1950	841	1.46712	3.02015e-14	1.1527e-13
AT1G14910	AT1G14910	-	1:5139712-5143689	5139712	5143689	3978	2413	1.46662	1.03366e-36	1.30088e-35
AT2G28420	AT2G28420	-	2:12157923-12158791	12157923	12158791	869	869	1.46598	1.19717e-19	6.4189e-19
AT3G51240	TT6	-	3:19025192-19026872	19025192	19026872	1681	1508	1.46576	2.03998e-08	5.08553e-08
AT3G51238	AT3G51238	-	3:19025110-19026779	19025110	19026779	1670	1670	1.46576	2.04551e-08	5.09857e-08
AT4G39925	AT4G39925	-	4:18517409-18518052	18517409	18518052	644	429	1.4657	1.93466e-08	4.83221e-08
AT5G41700	UBC8	-	5:16675582-16677509	16675582	16677509	1928	1425	1.46547	5.89111e-28	4.96113e-27
AT5G57900	SKIP1	-	5:23449711-23450933	23449711	23450933	1223	1126	1.46533	7.24505e-38	9.61104e-37
AT4G22220	ISU1	-	4:11759155-11760960	11759155	11760960	1806	872	1.46443	2.84249e-32	2.9392e-31
AT5G20670	AT5G20670	-	5:6993114-6993873	6993114	6993873	760	760	1.46406	4.3024e-07	9.61156e-07
AT5G38565	AT5G38565	-	5:15444310-15446009	15444310	15446009	1700	1311	1.46354	1.88853e-09	5.09925e-09
AT5G23330	AT5G23330	-	5:7854129-7855813	7854129	7855813	1685	1205	1.46347	9.63143e-37	1.21393e-35
AT4G36530	AT4G36530	-	4:17239958-17241937	17239958	17241937	1980	1466	1.46287	5.18399e-20	2.84829e-19
AT5G19430	AT5G19430	-	5:6553703-6555848	6553703	6555848	2146	1465	1.46222	3.11452e-37	4.02747e-36
AT2G43430	GLX2-1	-	2:18035369-18038255	18035369	18038255	2887	1767	1.46195	1.66554e-37	2.17368e-36
AT2G15880	AT2G15880	-	2:6918039-6920319	6918039	6920319	2281	2184	1.46189	2.62211e-13	9.38559e-13
ATMG01390	RRN18	-	Mt:361350-363284	361350	363284	1935	1935	1.4616	1.79301e-07	4.13831e-07
AT1G16720	HCF173	-	1:5723088-5726478	5723088	5726478	3391	2100	1.46149	1.28213e-41	1.98742e-40
AT1G67105	AT1G67105	-	1:25057479-25058264	25057479	25058264	786	786	1.46117	4.99807e-20	2.7504e-19
AT5G44380	AT5G44380	-	5:17878722-17881440	17878722	17881440	2719	1848	1.46051	1.3447e-07	3.14041e-07
AT5G27320	ATGID1C	-	5:9629087-9631210	9629087	9631210	2124	1666	1.46039	4.77327e-25	3.50074e-24
AT1G03770	RING1B	-	1:944572-947483	944572	947483	2912	1659	1.4597	3.93006e-36	4.81361e-35
AT1G72860	AT1G72860	-	1:27416228-27420778	27416228	27420778	4551	4360	1.45889	1.08646e-22	6.94503e-22
AT3G01560	AT3G01560	-	3:219582-221879	219582	221879	2298	2010	1.45853	1.08666e-27	9.03876e-27
AT2G36900	MEMB11	-	2:15491040-15492822	15491040	15492822	1783	1068	1.45717	2.61205e-40	3.85813e-39
AT2G20740	AT2G20740	-	2:8935607-8937512	8935607	8937512	1906	1099	1.45663	5.81638e-34	6.46447e-33
AT2G07785	AT2G07785	-	2:3348003-3348904	3348003	3348904	902	902	1.45636	9.13755e-08	2.16142e-07
AT4G32160	AT4G32160	-	4:15528805-15533100	15528805	15533100	4296	2631	1.45624	3.0167e-38	4.06882e-37
AT1G78080	RAP2.4	-	1:29364249-29366073	29364249	29366073	1825	1825	1.45597	1.9763e-27	1.61842e-26
AT2G03810	AT2G03810	-	2:1161029-1164573	1161029	1164573	3545	2259	1.45547	1.2235e-29	1.10927e-28
AT1G23960	AT1G23960	-	1:8478407-8480316	8478407	8480316	1910	1439	1.45546	8.19598e-42	1.28219e-40
AT1G02120	VAD1	-	1:395761-399897	395761	399897	4137	1974	1.45505	6.25055e-33	6.63342e-32
AT5G61190	AT5G61190	-	5:24615317-24620053	24615317	24620053	4737	3318	1.45281	9.54199e-32	9.67749e-31
AT4G38460	GGR	-	4:17994781-17996205	17994781	17996205	1425	1280	1.45229	3.5253e-13	1.25074e-12
AT1G16240	SYP51	-	1:5555007-5556841	5555007	5556841	1835	1103	1.45225	5.88224e-38	7.81544e-37
AT1G79880	AT1G79880	-	1:30046028-30048378	30046028	30048378	2351	1547	1.45214	7.72994e-37	9.8011e-36
AT5G39660	CDF2	-	5:15878699-15881044	15878699	15881044	2346	1927	1.45209	1.50601e-31	1.51469e-30
AT1G09140	At-SR30	-	1:2942564-2945961	2942564	2945961	3398	1611	1.4516	5.87676e-25	4.29145e-24
AT1G69830	ATAMY3	-	1:26288278-26293053	26288278	26293053	4776	2954	1.45086	1.49793e-15	6.2506e-15
AT5G29000	PHL1	-	5:11022083-11024960	11022083	11024960	2878	1989	1.45027	4.23183e-26	3.26938e-25
AT1G72855	AT1G72855	-	1:27416232-27418323	27416232	27418323	2092	1903	1.44958	1.98794e-21	1.1836e-20
AT5G22080	AT5G22080	-	5:7310171-7313670	7310171	7313670	3500	1300	1.44924	4.3196e-31	4.22891e-30
AT5G05130	AT5G05130	-	5:1512120-1515079	1512120	1515079	2960	2803	1.44829	8.2064e-29	7.18251e-28
AT2G46567	AT2G46567	-	2:19126641-19126751	19126641	19126751	111	111	1.44791	5.9628e-05	0.000109542
AT3G12820	AtMYB10	-	3:4074158-4075614	4074158	4075614	1457	890	1.44753	2.94089e-05	5.56644e-05
ATMG00970	ORF117	-	Mt:258045-258398	258045	258398	354	354	1.44742	0.00499182	0.00740159
AT2G15580	AT2G15580	-	2:6797560-6798939	6797560	6798939	1380	847	1.4474	3.66728e-08	8.95112e-08
AT1G31170	ATSRX	-	1:11133410-11134844	11133410	11134844	1435	1018	1.44692	1.52731e-21	9.15791e-21
AT4G36730	GBF1	-	4:17309612-17312488	17309612	17312488	2877	1506	1.44674	1.13847e-33	1.24893e-32
AT3G07200	AT3G07200	-	3:2290762-2292492	2290762	2292492	1731	923	1.44649	5.29008e-15	2.13254e-14
AT1G53670	MSRB1	-	1:20036641-20038219	20036641	20038219	1579	800	1.44504	3.2466e-29	2.90461e-28
AT3G07525	ATATG10	-	3:2399123-2400437	2399123	2400437	1315	892	1.44503	2.95867e-21	1.74744e-20
AT3G24020	AT3G24020	-	3:8678738-8679656	8678738	8679656	919	919	1.44365	4.88558e-07	1.08642e-06
AT1G05970	AT1G05970	-	1:1816056-1817282	1816056	1817282	1227	857	1.44329	8.40184e-25	6.08289e-24
AT3G21650	AT3G21650	-	3:7621569-7624076	7621569	7624076	2508	2338	1.44326	1.16712e-36	1.46448e-35
AT4G15475	AT4G15475	-	4:8845875-8848869	8845875	8848869	2995	2053	1.44323	1.72175e-41	2.64706e-40
AT5G54290	CcdA	-	5:22051034-22054028	22051034	22054028	2995	1236	1.44262	1.58082e-41	2.43481e-40
AT1G32790	CID11	-	1:11874704-11877387	11874704	11877387	2684	1750	1.44229	1.67951e-34	1.91441e-33
AT1G09740	AT1G09740	-	1:3154532-3156275	3154532	3156275	1744	843	1.44185	2.10395e-17	9.81631e-17
AT1G17520	AT1G17520	-	1:6024636-6027385	6024636	6027385	2750	1375	1.44176	7.67842e-37	9.74308e-36
AT3G13224	AT3G13224	-	3:4254743-4257409	4254743	4257409	2667	2196	1.44125	3.44396e-40	5.06041e-39
AT5G55490	GEX1	-	5:22478712-22481148	22478712	22481148	2437	1969	1.44053	3.16798e-12	1.04961e-11
AT1G22930	AT1G22930	-	1:8117339-8122127	8117339	8122127	4789	3948	1.44004	6.61257e-24	4.53897e-23
ATMG00665	NAD5B	-	Mt:190740-190761	190740	190761	22	22	1.44003	0.00636183	0.00932871
AT1G69840	AT1G69840	-	1:26293601-26295849	26293601	26295849	2249	1891	1.43947	3.51394e-37	4.53011e-36
AT2G37810	AT2G37810	-	2:15845350-15846051	15845350	15846051	702	702	1.43709	1.68571e-05	3.25842e-05
AT4G00230	XSP1	-	4:93923-97454	93923	97454	3532	2427	1.43706	2.76218e-16	1.20256e-15
AT2G43540	AT2G43540	-	2:18072371-18072963	18072371	18072963	593	593	1.43683	5.13834e-12	1.67747e-11
AT5G43980	PDLP1	-	5:17694680-17696622	17694680	17696622	1943	1213	1.43673	2.35721e-09	6.30639e-09
AT1G70290	ATTPS8	-	1:26471078-26474786	26471078	26474786	3709	3019	1.436	3.69666e-28	3.14597e-27
AT1G18260	AT1G18260	-	1:6278848-6282103	6278848	6282103	3256	2331	1.43574	1.07271e-28	9.35003e-28
AT3G61010	AT3G61010	-	3:22571327-22575255	22571327	22575255	3929	2136	1.43573	1.43089e-33	1.56162e-32
AT2G07731	AT2G07731	-	2:3467199-3468078	3467199	3468078	880	880	1.43565	5.30759e-08	1.27852e-07
AT4G37560	AT4G37560	-	4:17646408-17648684	17646408	17648684	2277	1667	1.43563	1.53081e-27	1.264e-26
ATMG00270	NAD6	-	Mt:76642-77259	76642	77259	618	618	1.43514	2.61098e-07	5.93873e-07
AT2G24940	AtMAPR2	AT2G24945	2:10609394-10612232	10609394	10612232	2839	2839	1.43509	1.93951e-23	1.29202e-22
AT2G24945	AT2G24945	AT2G24940	2:10609413-10612232	10609413	10612232	2820	2820	1.43509	1.94382e-23	1.29437e-22
AT4G39180	SEC14	-	4:18243726-18248805	18243726	18248805	5080	2396	1.43452	2.8933e-09	7.67871e-09
AT1G17640	AT1G17640	-	1:6067394-6069098	6067394	6069098	1705	1110	1.43396	9.03321e-32	9.16697e-31
AT1G50260	NTMC2TYPE5.1	-	1:18617593-18621739	18617593	18621739	4147	2383	1.4338	1.17074e-29	1.06487e-28
AT1G75170	AT1G75170	-	1:28213799-28215887	28213799	28215887	2089	1302	1.4337	9.38477e-11	2.80813e-10
AT1G64563	AT1G64563	-	1:23975085-23978335	23975085	23978335	3251	2921	1.43236	4.51979e-07	1.00786e-06
AT1G02690	IMPA-6	-	1:584260-587219	584260	587219	2960	1940	1.43108	5.53628e-22	3.39047e-21
AT3G60320	AT3G60320	-	3:22291886-22295371	22291886	22295371	3486	2721	1.43085	1.61603e-34	1.84454e-33
ATMG01190	ATP1	-	Mt:302166-303689	302166	303689	1524	1524	1.43004	1.27422e-10	3.77405e-10
AT1G68830	STN7	-	1:25872445-25875550	25872445	25875550	3106	1975	1.42994	3.42566e-22	2.1217e-21
AT4G23400	PIP1D	-	4:12220743-12222371	12220743	12222371	1629	1129	1.42988	1.50041e-14	5.85466e-14
AT1G28380	NSL1	-	1:9963593-9966320	9963593	9966320	2728	2202	1.42794	1.00185e-15	4.22163e-15
ATMG00285	NAD2	-	Mt:79740-81297	79740	81297	1558	578	1.42777	8.60513e-07	1.8715e-06
AT4G28300	AT4G28300	-	4:14014653-14017068	14014653	14017068	2416	2323	1.42753	4.78291e-27	3.8388e-26
AT1G68862	AT1G68862	-	1:25886804-25889024	25886804	25889024	2221	501	1.42719	2.97165e-16	1.29276e-15
AT2G01770	VIT1	-	2:334772-336438	334772	336438	1667	769	1.42645	5.19452e-06	1.05139e-05
AT4G04040	MEE51	-	4:1939250-1942954	1939250	1942954	3705	1899	1.42636	2.36447e-35	2.81459e-34
AT1G78140	AT1G78140	-	1:29401759-29403946	29401759	29403946	2188	1314	1.42625	5.24687e-33	5.6034e-32
AT2G31600	AT2G31600	-	2:13448190-13450095	13448190	13450095	1906	1325	1.42576	1.8901e-16	8.31007e-16
AT5G05870	UGT76C1	-	5:1767639-1769262	1767639	1769262	1624	1524	1.42535	2.49836e-26	1.94257e-25
AT1G06460	ACD32.1	-	1:1967087-1969561	1967087	1969561	2475	1226	1.42503	6.71854e-18	3.22624e-17
AT2G19350	AT2G19350	-	2:8376202-8377343	8376202	8377343	1142	685	1.42487	2.21899e-26	1.73011e-25
AT5G41370	XPB1	-	5:16551119-16556003	16551119	16556003	4885	2733	1.42484	5.82544e-29	5.14115e-28
AT1G80920	J8	-	1:30403644-30404690	30403644	30404690	1047	852	1.42464	5.02392e-22	3.08115e-21
AT2G07787	AT2G07787	-	2:3476928-3478704	3476928	3478704	1777	1254	1.42433	5.30079e-06	1.07213e-05
AT2G18280	TLP2	-	2:7945998-7948468	7945998	7948468	2471	1955	1.42378	4.6146e-31	4.50729e-30
AT2G36895	AT2G36895	-	2:15489028-15490347	15489028	15490347	1320	898	1.42322	5.61617e-20	3.07952e-19
AT4G19830	AT4G19830	-	4:10772402-10774023	10772402	10774023	1622	957	1.42258	2.79468e-12	9.29383e-12
AT4G19700	RING	-	4:10713561-10714707	10713561	10714707	1147	1059	1.42242	1.86515e-35	2.22962e-34
AT2G31130	AT2G31130	-	2:13263579-13266560	13263579	13266560	2982	1647	1.42216	6.62028e-25	4.81985e-24
AT4G04810	ATMSRB4	-	4:2441327-2442567	2441327	2442567	1241	505	1.4221	2.33792e-05	4.46557e-05
AT3G07250	AT3G07250	-	3:2300579-2308305	2300579	2308305	7727	3885	1.4219	8.59505e-11	2.57912e-10
AT1G47056	VFB1	-	1:17276103-17277659	17276103	17277659	1557	1557	1.42142	5.10048e-27	4.08594e-26
AT3G53510	AT3G53510	-	3:19837209-19839862	19837209	19839862	2654	2654	1.42054	7.50832e-14	2.79818e-13
AT5G56520	AT5G56520	-	5:22885192-22886541	22885192	22886541	1350	1187	1.41974	2.09908e-16	9.20497e-16
AT5G59385	AT5G59385	-	5:23953942-23954013	23953942	23954013	72	72	1.41956	0.00346081	0.00523607
AT1G71990	ATFUT13	-	1:27100284-27102262	27100284	27102262	1979	1432	1.41924	2.98383e-17	1.37998e-16
AT4G13200	AT4G13200	-	4:7668147-7669214	7668147	7669214	1068	751	1.4184	7.17782e-29	6.31491e-28
AT5G40540	AT5G40540	-	5:16237298-16239601	16237298	16239601	2304	1525	1.41723	9.99131e-27	7.92516e-26
AT4G39675	AT4G39675	-	4:18413775-18414240	18413775	18414240	466	466	1.41715	5.30645e-09	1.38295e-08
AT5G60950	COBL5	-	5:24526847-24528084	24526847	24528084	1238	1004	1.4152	0.000108173	0.000193291
ATMG00830	CCB382	-	Mt:231894-233042	231894	233042	1149	1149	1.41505	0.000277874	0.000474485
AT5G46295	AT5G46295	-	5:18779796-18780205	18779796	18780205	410	410	1.41504	1.45592e-05	2.82879e-05
AT4G25170	AT4G25170	-	4:12909575-12911580	12909575	12911580	2006	1436	1.41472	6.75233e-33	7.15248e-32
AT5G12030	AT-HSP17.6A	-	5:3884107-3884737	3884107	3884737	631	631	1.41379	5.17078e-15	2.08544e-14
AT1G61690	AT1G61690	-	1:22782607-22786859	22782607	22786859	4253	3811	1.41345	3.35097e-34	3.7689e-33
AT2G38530	LTP2	-	2:16128378-16129158	16128378	16129158	781	670	1.41279	4.7371e-16	2.03877e-15
AT3G52110	AT3G52110	-	3:19323750-19325713	19323750	19325713	1964	1345	1.41216	1.28649e-07	3.00904e-07
AT5G47720	AT5G47720	-	5:19331547-19334427	19331547	19334427	2881	1892	1.41205	2.5417e-30	2.39551e-29
AT2G01930	BPC1	-	2:427117-428839	427117	428839	1723	1701	1.41161	1.08392e-39	1.55752e-38
AT5G55370	AT5G55370	-	5:22445085-22446116	22445085	22446116	1032	1032	1.4115	2.22849e-20	1.25404e-19
AT2G37970	SOUL-1	-	2:15890972-15891843	15890972	15891843	872	872	1.41146	2.12225e-30	2.00914e-29
AT2G07708	AT2G07708	AT2G07709	2:3386851-3388493	3386851	3388493	1643	1643	1.4112	2.29291e-08	5.68759e-08
AT1G05760	RTM1	-	1:1723734-1724486	1723734	1724486	753	634	1.41046	6.81445e-06	1.36297e-05
AT5G49290	ATRLP56	-	5:19980195-19983869	19980195	19983869	3675	2727	1.41028	2.04359e-14	7.8977e-14
AT3G15670	AT3G15670	-	3:5309886-5310988	5309886	5310988	1103	1020	1.41013	4.50375e-28	3.80984e-27
ATMG01360	COX1	-	Mt:349830-351413	349830	351413	1584	1584	1.40996	7.49295e-14	2.79368e-13
AT3G48790	AT3G48790	-	3:18093404-18095181	18093404	18095181	1778	1053	1.40957	3.72442e-09	9.82593e-09
AT3G52105	AT3G52105	-	3:19323332-19323827	19323332	19323827	496	496	1.40952	3.94716e-22	2.43667e-21
AT5G46840	AT5G46840	-	5:19005601-19007770	19005601	19007770	2170	1717	1.40943	2.54042e-31	2.51619e-30
AT3G63052	AT3G63052	-	3:23298911-23299111	23298911	23299111	201	201	1.40839	0.0105516	0.0150469
AT4G38220	AT4G38220	-	4:17925180-17927097	17925180	17927097	1918	1551	1.40829	4.09961e-36	5.01766e-35
AT3G62190	AT3G62190	-	3:23021040-23023332	23021040	23023332	2293	1374	1.40818	1.86342e-20	1.05386e-19
AT4G13010	AT4G13010	-	4:7600551-7602729	7600551	7602729	2179	1283	1.40745	1.13451e-34	1.30461e-33
AT1G75110	RRA2	-	1:28194115-28195933	28194115	28195933	1819	1568	1.40709	7.16999e-08	1.70866e-07
AT4G17370	AT4G17370	-	4:9706058-9708261	9706058	9708261	2204	1356	1.40624	1.47106e-30	1.40365e-29
AT2G07827	AT2G07827	-	2:3474996-3476845	3474996	3476845	1850	623	1.4052	8.49664e-05	0.000153516
AT2G38823	AT2G38823	-	2:16224072-16225296	16224072	16225296	1225	861	1.40413	8.32674e-08	1.97626e-07
AT3G53403	AT3G53403	-	3:19800361-19800695	19800361	19800695	335	335	1.40333	2.7934e-05	5.29674e-05
AT3G51940	AT3G51940	-	3:19273494-19275269	19273494	19275269	1776	1688	1.40329	3.02748e-18	1.47982e-17
AT4G36850	AT4G36850	-	4:17353291-17355891	17353291	17355891	2601	1372	1.40263	6.10404e-31	5.9177e-30
AT4G11040	AT4G11040	-	4:6745100-6746944	6745100	6746944	1845	1364	1.40074	1.33721e-30	1.27809e-29
ATMG00650	NAD4L	-	Mt:188929-189231	188929	189231	303	303	1.40064	1.16741e-07	2.74112e-07
AT5G55970	AT5G55970	-	5:22667235-22669545	22667235	22669545	2311	1892	1.40048	6.93804e-37	8.82345e-36
AT1G68220	AT1G68220	-	1:25570231-25571712	25570231	25571712	1482	847	1.40044	1.99059e-29	1.79228e-28
AT5G43600	ATAAH-2	-	5:17512476-17515495	17512476	17515495	3020	1821	1.40038	5.54294e-38	7.37041e-37
AT2G36490	DML1	-	2:15308021-15314807	15308021	15314807	6787	4713	1.39958	5.97919e-32	6.12279e-31
AT4G29070	AT4G29070	-	4:14321813-14323307	14321813	14323307	1495	1346	1.39957	1.02006e-26	8.08356e-26
AT3G56880	AT3G56880	-	3:21059915-21060965	21059915	21060965	1051	1051	1.39933	7.66585e-26	5.85031e-25
AT1G05560	UGT1	-	1:1645498-1647147	1645498	1647147	1650	1650	1.39877	2.35666e-22	1.47636e-21
AT2G47850	AT2G47850	-	2:19595640-19598581	19595640	19598581	2942	2182	1.39864	2.57924e-38	3.48991e-37
AT1G32520	AT1G32520	-	1:11758211-11759280	11758211	11759280	1070	939	1.39787	5.71916e-13	1.99934e-12
AT3G62290	ATARFA1E	-	3:23051544-23053817	23051544	23053817	2274	1033	1.39762	1.37513e-27	1.13879e-26
AT2G25010	AT2G25010	-	2:10631531-10633663	10631531	10633663	2133	1806	1.39756	1.03341e-25	7.83364e-25
AT2G02570	AT2G02570	-	2:697951-700917	697951	700917	2967	1429	1.3969	6.06028e-23	3.93639e-22
AT5G58950	AT5G58950	-	5:23800928-23803673	23800928	23803673	2746	2310	1.39585	5.34089e-29	4.72831e-28
AT5G16960	AT5G16960	-	5:5574281-5575910	5574281	5575910	1630	1323	1.39569	7.43889e-06	1.48401e-05
AT2G29460	GST22	-	2:12626536-12627678	12626536	12627678	1143	906	1.39527	2.77316e-13	9.9116e-13
AT5G62560	AT5G62560	-	5:25109991-25112001	25109991	25112001	2011	2011	1.39527	1.0247e-14	4.04126e-14
AT5G12310	AT5G12310	-	5:3980226-3982442	3980226	3982442	2217	1373	1.39518	1.57905e-36	1.97114e-35
AT1G45229	AT1G45229	-	1:17154921-17159397	17154921	17159397	4477	439	1.39488	2.19643e-08	5.45947e-08
AT1G28540	AT1G28540	-	1:10035664-10036956	10035664	10036956	1293	602	1.39486	3.71694e-29	3.31664e-28
AT5G11390	WIT1	-	5:3633667-3636570	3633667	3636570	2904	2387	1.39478	3.2662e-26	2.53494e-25
AT1G36220	AT1G36220	-	1:13601056-13601579	13601056	13601579	524	524	1.39469	9.00688e-05	0.000162312
AT1G19680	AT1G19680	-	1:6805457-6807862	6805457	6807862	2406	1805	1.39423	1.16945e-28	1.01827e-27
AT2G43710	FAB2	-	2:18119956-18122889	18119956	18122889	2934	1755	1.39392	1.84181e-40	2.73476e-39
AT1G66730	AtLIG6	-	1:24884681-24892046	24884681	24892046	7366	4724	1.39372	5.27102e-23	3.43825e-22
AT5G39240	AT5G39240	-	5:15712683-15713003	15712683	15713003	321	321	1.39289	8.25095e-07	1.79859e-06
AT1G18773	AT1G18773	-	1:6474802-6475904	6474802	6475904	1103	850	1.39229	1.14251e-06	2.45827e-06
AT1G55310	SR33	-	1:20630065-20632973	20630065	20632973	2909	1272	1.39154	2.4363e-27	1.9817e-26
AT3G55610	P5CS2	-	3:20624020-20629093	20624020	20629093	5074	2582	1.39129	1.5709e-26	1.23276e-25
AT1G26930	AT1G26930	-	1:9336057-9337786	9336057	9337786	1730	1547	1.39044	6.312e-09	1.63619e-08
AT5G16450	AT5G16450	-	5:5373883-5375459	5373883	5375459	1577	857	1.3903	1.19299e-10	3.53818e-10
AT1G56660	AT1G56660	-	1:21237888-21240558	21237888	21240558	2671	1821	1.39011	3.58154e-07	8.0575e-07
AT5G23510	AT5G23510	-	5:7926945-7929338	7926945	7929338	2394	1365	1.38902	2.74226e-09	7.29159e-09
AT1G07090	LSH6	-	1:2173952-2174894	2173952	2174894	943	943	1.38837	3.17635e-10	9.147e-10
AT1G10140	AT1G10140	-	1:3322802-3323548	3322802	3323548	747	747	1.38793	2.59145e-09	6.91013e-09
AT1G44446	CAO	-	1:16848359-16851224	16848359	16851224	2866	2147	1.38787	3.58582e-31	3.52276e-30
AT4G36052	AT4G36052	-	4:17052347-17053499	17052347	17053499	1153	1084	1.38684	1.72347e-17	8.08345e-17
AT1G09770	ATCDC5	-	1:3161841-3165360	3161841	3165360	3520	2934	1.38645	4.86864e-26	3.75109e-25
AT3G52340	ATSPP2	-	3:19407023-19409457	19407023	19409457	2435	1804	1.38643	7.93797e-24	5.42454e-23
AT2G23980	ATCNGC6	-	2:10201104-10204467	10201104	10204467	3364	2516	1.38587	9.16314e-23	5.88185e-22
AT3G48120	AT3G48120	-	3:17772057-17774739	17772057	17774739	2683	1256	1.38586	3.66367e-24	2.55311e-23
AT1G17100	AT1G17100	-	1:5844676-5845661	5844676	5845661	986	911	1.38438	9.83776e-27	7.80702e-26
AT1G11910	APA1	-	1:4016784-4020983	4016784	4020983	4200	1970	1.38406	6.95266e-30	6.40303e-29
AT3G26330	CYP71B37	-	3:9646805-9648584	9646805	9648584	1780	1619	1.38395	1.24489e-11	3.96171e-11
AT2G29525	AtIPCS3	-	2:12638334-12640820	12638334	12640820	2487	1528	1.38373	1.14002e-22	7.27919e-22
AT2G19310	AT2G19310	-	2:8369794-8370406	8369794	8370406	613	613	1.38345	9.26984e-24	6.30163e-23
AT5G45250	RPS4	-	5:18321914-18326022	18321914	18326022	4109	3654	1.38322	2.49576e-15	1.02788e-14
ATMG00080	RPL16	ATMG00090	Mt:25076-25615	25076	25615	540	540	1.38293	4.21075e-12	1.38318e-11
AT3G01200	AtRP2	-	3:69511-71362	69511	71362	1852	1463	1.38259	5.87554e-39	8.17889e-38
AT1G63240	AT1G63240	-	1:23456021-23458661	23456021	23458661	2641	1925	1.38259	2.54715e-38	3.44925e-37
AT2G34440	AGL29	-	2:14526950-14527689	14526950	14527689	740	740	1.3825	2.14103e-07	4.9094e-07
AT2G41290	SSL2	-	2:17210428-17212959	17210428	17212959	2532	1357	1.38246	6.01957e-11	1.82899e-10
AT1G76700	AT1G76700	-	1:28780408-28783248	28780408	28783248	2841	1634	1.38197	6.87694e-28	5.77697e-27
AT1G68568	AT1G68568	-	1:25746977-25747654	25746977	25747654	678	510	1.38173	2.2178e-07	5.07856e-07
AT4G23890	AT4G23890	-	4:12420414-12421464	12420414	12421464	1051	1051	1.38091	7.21316e-18	3.45884e-17
AT3G14160	AT3G14160	-	3:4693361-4695604	4693361	4695604	2244	1908	1.38082	6.42683e-25	4.68707e-24
AT3G20910	NF-YA9	-	3:7326382-7328576	7326382	7328576	2195	1232	1.38044	6.63685e-36	8.07635e-35
AT3G20420	RTL2	-	3:7119282-7120919	7119282	7120919	1638	1289	1.37994	2.32602e-07	5.31629e-07
AT2G07698	AT2G07698	-	2:3361474-3364127	3361474	3364127	2654	2433	1.37835	8.34011e-10	2.31925e-09
AT5G03555	AT5G03555	-	5:898241-900159	898241	900159	1919	1919	1.37796	3.46121e-10	9.9487e-10
AT3G01202	AT3G01202	-	3:69854-71415	69854	71415	1562	1248	1.37779	1.54534e-39	2.20186e-38
AT1G15050	IAA34	-	1:5182256-5183243	5182256	5183243	988	558	1.37744	0.00191544	0.00298551
AT5G46760	AT5G46760	-	5:18974231-18976009	18974231	18976009	1779	1779	1.37736	3.84573e-24	2.66899e-23
AT5G39720	AIG2L	-	5:15899646-15900653	15899646	15900653	1008	661	1.37639	1.35844e-11	4.30929e-11
AT2G07774	AT2G07774	AT2G07754	2:3303766-3304573	3303766	3304573	808	514	1.37541	0.00476371	0.00708384
AT5G26770	AT5G26770	-	5:9407720-9410117	9407720	9410117	2398	1651	1.37417	1.56121e-32	1.63329e-31
AT5G18040	AT5G18040	-	5:5972419-5974156	5972419	5974156	1738	1076	1.37298	1.32066e-21	7.94979e-21
AT5G51451	RGF5	-	5:20898108-20898763	20898108	20898763	656	537	1.37291	4.6875e-09	1.22674e-08
AT1G07200	AT1G07200	-	1:2208719-2212546	2208719	2212546	3828	3489	1.37285	1.481e-14	5.78156e-14
AT2G22660	AT2G22660	-	2:9627408-9631081	9627408	9631081	3674	2887	1.37259	4.6599e-26	3.5919e-25
ATMG00500	ORF141	ATMG00490	Mt:130968-131393	130968	131393	426	426	1.37256	8.94057e-05	0.00016122
AT5G17000	AT5G17000	-	5:5584801-5587063	5584801	5587063	2263	1292	1.37244	1.13016e-09	3.11009e-09
AT1G55510	BCDH.BETA1	-	1:20723302-20725668	20723302	20725668	2367	1402	1.37233	9.31159e-26	7.07756e-25
AT4G00355	AT4G00355	-	4:154705-156376	154705	156376	1672	1672	1.3723	6.54139e-36	7.96591e-35
AT1G02610	AT1G02610	-	1:553050-555994	553050	555994	2945	937	1.37204	1.57948e-10	4.64729e-10
AT5G17540	AT5G17540	-	5:5781987-5783706	5781987	5783706	1720	1484	1.37135	1.23758e-14	4.85367e-14
AT5G61455	U2.7	AT5G61460	5:24713264-24714094	24713264	24714094	831	831	1.37084	0.000163375	0.000286189
AT1G01046	MIR838A	-	1:28500-28706	28500	28706	207	207	1.37036	0.00832329	0.0120273
AT5G18245	AT5G18245	-	5:6028285-6033231	6028285	6033231	4947	2323	1.36916	8.00696e-27	6.38107e-26
AT5G22000	RHF2A	-	5:7277183-7280255	7277183	7280255	3073	1880	1.36862	3.39834e-30	3.17285e-29
AT4G33467	AT4G33467	-	4:16101464-16102196	16101464	16102196	733	648	1.3685	1.03566e-25	7.84719e-25
AT4G28910	NINJA	-	4:14264067-14266749	14264067	14266749	2683	1954	1.36834	5.30456e-31	5.16036e-30
AT4G26590	ATOPT5	-	4:13413973-13417055	13413973	13417055	3083	2628	1.36801	4.59424e-29	4.0801e-28
AT3G41761	AT3G41761	-	3:14195917-14196078	14195917	14196078	162	162	1.36736	0.000597882	0.000986582
AT5G23235	AT5G23235	-	5:7826028-7828724	7826028	7828724	2697	2697	1.36728	2.72871e-18	1.33726e-17
AT2G36270	ABI5	-	2:15204764-15207528	15204764	15207528	2765	1720	1.36693	5.305e-29	4.70145e-28
AT4G27460	AT4G27460	-	4:13732910-13734304	13732910	13734304	1395	1246	1.3651	2.16229e-27	1.76561e-26
AT1G54740	AT1G54740	-	1:20430769-20431986	20430769	20431986	1218	1218	1.36509	2.27493e-07	5.20446e-07
AT2G07767	AT2G07767	-	2:3272149-3272518	3272149	3272518	370	370	1.36323	0.0010541	0.00169222
AT3G24982	ATRLP40	-	3:9106000-9108937	9106000	9108937	2938	2905	1.36249	1.76054e-14	6.83343e-14
AT1G64950	CYP89A5	-	1:24127561-24129458	24127561	24129458	1898	1898	1.36238	2.16205e-32	2.24521e-31
AT1G05894	AT1G05894	-	1:1784803-1786292	1784803	1786292	1490	1490	1.36211	3.33688e-05	6.28152e-05
AT4G06746	RAP2.9	-	4:4073962-4074545	4073962	4074545	584	584	1.36208	2.94578e-15	1.20734e-14
AT3G10450	SCPL7	-	3:3249526-3252506	3249526	3252506	2981	1615	1.35876	8.38114e-28	7.0162e-27
AT5G65840	AT5G65840	-	5:26343730-26346082	26343730	26346082	2353	1220	1.35841	4.44753e-17	2.0292e-16
AT1G01820	PEX11C	-	1:296001-298120	296001	298120	2120	1048	1.35835	1.31073e-28	1.13894e-27
AT5G27730	AT5G27730	-	5:9820249-9823086	9820249	9823086	2838	1699	1.35824	1.94681e-29	1.75472e-28
AT3G02610	AT3G02610	-	3:555626-557723	555626	557723	2098	1444	1.3582	3.53907e-07	7.97043e-07
ATMG00510	NAD7	-	Mt:132071-138153	132071	138153	6083	1185	1.35804	4.76899e-06	9.68271e-06
AT1G18750	AGL65	-	1:6466761-6469984	6466761	6469984	3224	1880	1.35789	1.41085e-16	6.25662e-16
AT5G37670	AT5G37670	-	5:14968991-14969509	14968991	14969509	519	519	1.35742	1.03596e-10	3.09217e-10
AT4G33910	AT4G33910	-	4:16256733-16258771	16256733	16258771	2039	1234	1.3573	1.44262e-36	1.80349e-35
AT4G09830	AT4G09830	-	4:6188767-6190853	6188767	6190853	2087	937	1.35701	2.27073e-23	1.50613e-22
AT1G78960	ATLUP2	-	1:29696470-29701263	29696470	29701263	4794	2578	1.35659	2.03125e-23	1.35153e-22
AT5G28390	AT5G28390	-	5:10342024-10342997	10342024	10342997	974	543	1.35654	1.55194e-17	7.29712e-17
AT5G05080	UBC22	-	5:1498553-1500784	1498553	1500784	2232	1229	1.35564	1.25409e-30	1.19932e-29
AT2G43570	CHI	-	2:18076224-18077463	18076224	18077463	1240	1027	1.35459	2.46343e-12	8.23105e-12
AT4G14900	AT4G14900	-	4:8521522-8523705	8521522	8523705	2184	1934	1.35437	1.06952e-29	9.75419e-29
AT1G16820	AT1G16820	-	1:5756835-5758464	5756835	5758464	1630	775	1.35426	1.41139e-10	4.16576e-10
AT5G42830	AT5G42830	-	5:17176384-17178018	17176384	17178018	1635	1465	1.35328	2.29036e-07	5.23763e-07
AT4G37370	CYP81D8	-	4:17569828-17571704	17569828	17571704	1877	1663	1.35308	6.87322e-12	2.22514e-11
AT1G64790	ILA	-	1:24064937-24083428	24064937	24083428	18492	8528	1.35251	6.48719e-24	4.45471e-23
AT1G75300	AT1G75300	-	1:28255495-28257040	28255495	28257040	1546	1139	1.35224	5.7479e-31	5.58523e-30
AT3G10130	AT3G10130	-	3:3130998-3133192	3130998	3133192	2195	1088	1.35197	5.08832e-37	6.50038e-36
AT1G05060	AT1G05060	-	1:1451030-1452872	1451030	1452872	1843	1001	1.35178	2.26513e-24	1.59891e-23
AT4G09760	AT4G09760	-	4:6148758-6151399	6148758	6151399	2642	1665	1.35163	2.47402e-28	2.12361e-27
AT3G20770	EIN3	-	3:7260432-7263352	7260432	7263352	2921	2413	1.35073	2.03788e-28	1.75727e-27
AT1G69295	PDCB4	-	1:26050197-26052567	26050197	26052567	2371	1688	1.34981	6.97605e-25	5.07232e-24
AT1G27920	MAP65-8	-	1:9726948-9729848	9726948	9729848	2901	1847	1.34979	1.21247e-22	7.73012e-22
AT1G79245	AT1G79245	-	1:29804735-29809514	29804735	29809514	4780	4780	1.34976	5.2369e-16	2.24816e-15
AT5G12840	HAP2A	-	5:4050691-4053606	4050691	4053606	2916	1504	1.34829	2.81179e-30	2.64418e-29
AT1G76460	AT1G76460	-	1:28686181-28689121	28686181	28689121	2941	2123	1.34819	1.86855e-32	1.95e-31
AT3G63280	ATNEK4	-	3:23377979-23381546	23377979	23381546	3568	2110	1.34803	6.49713e-10	1.82807e-09
AT5G51070	ERD1	-	5:20764315-20768681	20764315	20768681	4367	3202	1.34776	2.35713e-34	2.66884e-33
AT3G60200	AT3G60200	-	3:22249257-22250520	22249257	22250520	1264	1264	1.34682	6.39994e-11	1.93877e-10
AT4G36050	AT4G36050	-	4:17051982-17055059	17051982	17055059	3078	2294	1.34633	7.40835e-23	4.78265e-22
AT3G06210	AT3G06210	-	3:1880093-1883491	1880093	1883491	3399	2697	1.34572	5.42518e-21	3.14924e-20
AT2G07773	AT2G07773	-	2:3240838-3241659	3240838	3241659	822	822	1.34543	0.000258631	0.000443372
AT2G12550	AT2G12550	-	2:5114868-5118747	5114868	5118747	3880	1963	1.34506	1.28077e-23	8.63387e-23
AT3G27997	AT3G27997	-	3:10400133-10401382	10400133	10401382	1250	1250	1.34493	3.81229e-18	1.8538e-17
AT1G49390	AT1G49390	-	1:18279600-18280978	18279600	18280978	1379	1152	1.34469	2.6122e-07	5.9407e-07
AT2G07766	AT2G07766	-	2:3503522-3503608	3503522	3503608	87	87	1.34346	0.0334229	0.0446068
AT2G07793	AT2G07793	-	2:3369354-3369440	3369354	3369440	87	87	1.34346	0.033403	0.0445838
ATMG00420	TRNS.3	-	Mt:112953-113039	112953	113039	87	87	1.34346	0.0333889	0.0445685
AT5G14390	AT5G14390	-	5:4637312-4639756	4637312	4639756	2445	1530	1.343	1.20717e-32	1.26682e-31
AT3G05200	ATL6	-	3:1476982-1478730	1476982	1478730	1749	1749	1.34275	1.19434e-29	1.0856e-28
AT3G19553	AT3G19553	-	3:6790742-6792919	6790742	6792919	2178	1912	1.34245	6.38746e-10	1.79871e-09
ATMG00360	TRNC	-	Mt:104885-104995	104885	104995	111	111	1.34203	0.0202878	0.0279355
AT1G15310	ATHSRP54A	-	1:5269019-5272058	5269019	5272058	3040	1705	1.34182	1.82834e-21	1.09088e-20
AT5G15260	AT5G15260	-	5:4953440-4954932	4953440	4954932	1493	1384	1.34113	5.75453e-20	3.15233e-19
AT4G18160	ATTPK3	-	4:10055696-10057736	10055696	10057736	2041	1501	1.34109	1.62919e-23	1.09217e-22
AT1G06430	FTSH8	-	1:1960058-1963011	1960058	1963011	2954	2255	1.34106	3.71346e-26	2.87547e-25
AT1G51130	AT1G51130	-	1:18939277-18941704	18939277	18941704	2428	1559	1.34089	2.28351e-23	1.51402e-22
AT1G75290	AT1G75290	-	1:28253890-28255173	28253890	28255173	1284	957	1.34078	8.05857e-14	2.99797e-13
AT4G08110	AT4G08110	-	4:5083926-5086640	5083926	5086640	2715	2715	1.34072	1.51215e-31	1.51996e-30
AT4G16280	FCA	-	4:9206597-9214825	9206597	9214825	8229	5182	1.34053	1.36772e-32	1.43352e-31
AT5G14620	DRM2	-	5:4715253-4718704	4715253	4718704	3452	2183	1.34044	8.07197e-34	8.90706e-33
AT1G71950	AT1G71950	-	1:27080184-27081613	27080184	27081613	1430	720	1.34038	8.41109e-26	6.41038e-25
AT4G33280	AT4G33280	-	4:16047354-16049355	16047354	16049355	2002	1062	1.33766	1.49421e-08	3.75873e-08
AT3G29260	AT3G29260	-	3:11215952-11216866	11215952	11216866	915	812	1.3368	0.00130371	0.00207112
AT1G64561	AT1G64561	-	1:23974041-23974775	23974041	23974775	735	549	1.33653	8.28219e-09	2.12865e-08
AT2G07681	AT2G07681	-	2:3287552-3292366	3287552	3292366	4815	2291	1.33638	7.72145e-06	1.53911e-05
AT4G09840	AT4G09840	-	4:6190788-6191664	6190788	6191664	877	743	1.33618	5.20445e-09	1.35741e-08
AT1G77370	AT1G77370	-	1:29073843-29074796	29073843	29074796	954	620	1.33541	1.84815e-17	8.64187e-17
AT2G07739	AT2G07739	-	2:3495511-3496110	3495511	3496110	600	600	1.33529	1.07723e-05	2.12149e-05
AT4G36210	AT4G36210	-	4:17130246-17134656	17130246	17134656	4411	2675	1.33446	1.72152e-28	1.49054e-27
AT3G54510	AT3G54510	-	3:20180292-20183509	20180292	20183509	3218	2495	1.3341	2.96877e-27	2.41019e-26
AT5G65495	AT5G65495	-	5:26180470-26181069	26180470	26181069	600	600	1.33344	5.53428e-15	2.22673e-14
AT3G57300	ATINO80	-	3:21199488-21207885	21199488	21207885	8398	5010	1.33336	4.83112e-24	3.33645e-23
AT1G31790	AT1G31790	-	1:11394690-11396018	11394690	11396018	1329	1329	1.33279	2.0405e-20	1.15055e-19
AT5G66780	AT5G66780	-	5:26663573-26664403	26663573	26664403	831	627	1.33257	8.4268e-23	5.4133e-22
AT1G35730	APUM9	-	1:13227324-13229796	13227324	13229796	2473	1695	1.3324	0.000233577	0.000402172
AT5G53740	AT5G53740	AT5G53742	5:21811633-21814908	21811633	21814908	3276	828	1.33149	1.12547e-08	2.86495e-08
AT2G41460	ARP	-	2:17285723-17288928	17285723	17288928	3206	1845	1.331	1.22614e-28	1.06654e-27
AT1G07870	AT1G07870	AT1G07860	1:2428773-2432057	2428773	2432057	3285	2244	1.33094	5.91444e-16	2.52748e-15
AT5G23230	NIC2	-	5:7825882-7826611	7825882	7826611	730	730	1.33067	6.65439e-18	3.19815e-17
AT5G37720	ALY4	-	5:14981638-14984606	14981638	14984606	2969	1215	1.33053	8.27805e-30	7.59884e-29
AT5G19150	AT5G19150	-	5:6423305-6428467	6423305	6428467	5163	1384	1.33008	2.39692e-30	2.26283e-29
AT2G40950	BZIP17	-	2:17087620-17090424	17087620	17090424	2805	2467	1.32975	2.66196e-37	3.44488e-36
ATMG01000	ORF114	ATMG00990;ATMG01010	Mt:260963-261307	260963	261307	345	345	1.32961	0.022623	0.0309246
AT2G37710	RLK	-	2:15814718-15817004	15814718	15817004	2287	2287	1.32936	2.56977e-15	1.05758e-14
AT1G76600	AT1G76600	-	1:28746888-28747845	28746888	28747845	958	958	1.32915	3.35993e-06	6.93411e-06
AT5G16820	ATHSFA1B	-	5:5530273-5532889	5530273	5532889	2617	1930	1.32864	4.53464e-28	3.83215e-27
AT1G10095	AT1G10095	-	1:3297324-3300443	3297324	3300443	3120	1507	1.32822	8.38385e-19	4.24255e-18
AT2G07727	AT2G07727	-	2:3450578-3452044	3450578	3452044	1467	1467	1.32821	4.76272e-12	1.55725e-11
AT5G10946	AT5G10946	-	5:3455607-3457306	3455607	3457306	1700	833	1.32799	5.3351e-06	1.07855e-05
AT1G06265	AT1G06265	-	1:1914943-1917661	1914943	1917661	2719	2334	1.32798	8.13518e-29	7.12385e-28
AT4G21540	SPHK1	-	4:11459553-11462606	11459553	11462606	3054	1767	1.3279	2.04105e-30	1.93334e-29
AT3G57760	AT3G57760	-	3:21395593-21397244	21395593	21397244	1652	1460	1.32748	6.90124e-10	1.93534e-09
AT3G55450	PBL1	-	3:20557899-20560212	20557899	20560212	2314	1760	1.32695	1.54899e-21	9.28464e-21
AT4G00752	AT4G00752	-	4:317564-320895	317564	320895	3332	1719	1.3266	5.07167e-39	7.08902e-38
AT5G23570	ATSGS3	-	5:7943124-7946050	7943124	7946050	2927	2145	1.32648	1.13547e-30	1.08886e-29
AT1G03200	AT1G03200	-	1:780602-781285	780602	781285	684	440	1.32562	1.78653e-07	4.12447e-07
AT1G03980	ATPCS2	-	1:1018570-1022108	1018570	1022108	3539	2337	1.32537	6.07579e-28	5.11412e-27
AT2G32795	AT2G32795	-	2:13909423-13910910	13909423	13910910	1488	663	1.32527	3.60191e-08	8.80173e-08
AT5G04330	AT5G04330	-	5:1212602-1214439	1212602	1214439	1838	1761	1.32479	1.15938e-05	2.27428e-05
AT5G58160	AT5G58160	-	5:23533701-23539465	23533701	23539465	5765	3998	1.32468	1.70005e-24	1.21114e-23
AT5G04250	AT5G04250	-	5:1176005-1178700	1176005	1178700	2696	1534	1.32452	1.17253e-20	6.6984e-20
AT3G27610	AT3G27610	-	3:10225525-10228192	10225525	10228192	2668	1417	1.32442	4.71914e-27	3.78942e-26
ATMG00370	ORF199	-	Mt:104954-105553	104954	105553	600	600	1.32406	0.000252806	0.000433867
AT1G29400	ML5	-	1:10290040-10294630	10290040	10294630	4591	3032	1.32392	9.5935e-29	8.37489e-28
AT4G16620	AT4G16620	-	4:9358117-9360060	9358117	9360060	1944	1337	1.32351	1.18809e-14	4.665e-14
AT5G05220	AT5G05220	-	5:1550267-1550928	1550267	1550928	662	662	1.32342	1.87349e-11	5.8814e-11
AT5G64360	AT5G64360	-	5:25736340-25738667	25736340	25738667	2328	2148	1.32333	7.62742e-28	6.39472e-27
AT2G43510	ATTI1	-	2:18067172-18067802	18067172	18067802	631	491	1.32285	2.64867e-07	6.02122e-07
AT1G31830	AT1G31830	-	1:11418625-11420837	11418625	11420837	2213	1953	1.32212	1.57337e-33	1.7127e-32
AT2G17450	RHA3A	-	2:7576474-7577300	7576474	7577300	827	827	1.32194	2.63683e-09	7.02448e-09
AT2G26430	RCY1	-	2:11243219-11246035	11243219	11246035	2817	1673	1.32191	9.79803e-32	9.93121e-31
AT3G13222	GIP1	-	3:4251014-4254267	4251014	4254267	3254	2038	1.32184	5.29121e-33	5.64719e-32
AT5G66250	AT5G66250	-	5:26468533-26470556	26468533	26470556	2024	1678	1.32147	4.29801e-26	3.319e-25
AT4G26582	AT4G26582	-	4:13413579-13414943	13413579	13414943	1365	987	1.32136	1.23272e-18	6.16615e-18
ATMG00516	NAD1	-	Mt:143219-147048	143219	147048	3830	318	1.32101	1.49534e-07	3.47783e-07
AT5G27920	AT5G27920	-	5:9941905-9944778	9941905	9944778	2874	2358	1.32089	1.03732e-15	4.36349e-15
AT1G11055	AT1G11055	-	1:3683919-3684095	3683919	3684095	177	177	1.32066	6.73489e-05	0.000123085
AT5G05250	AT5G05250	-	5:1557037-1557998	1557037	1557998	962	962	1.31955	6.58967e-16	2.80866e-15
AT2G07786	AT2G07786	-	2:3399657-3399912	3399657	3399912	256	256	1.31941	2.29435e-07	5.24605e-07
AT5G61865	AT5G61865	-	5:24847327-24849792	24847327	24849792	2466	1408	1.31902	1.16226e-06	2.49855e-06
ATMG00060	NAD5	-	Mt:20571-22086	20571	22086	1516	542	1.31893	1.41041e-09	3.84629e-09
AT3G14750	AT3G14750	-	3:4953576-4955656	4953576	4955656	2081	1468	1.31884	5.92967e-22	3.62352e-21
AT5G54855	AT5G54855	-	5:22282767-22284387	22282767	22284387	1621	712	1.31815	6.5016e-22	3.96157e-21
AT2G41880	GK-1	-	2:17474619-17477223	17474619	17477223	2605	1556	1.31813	5.09087e-12	1.66229e-11
AT3G15270	SPL5	-	3:5140365-5141348	5140365	5141348	984	897	1.31791	1.03349e-05	2.0382e-05
AT1G34300	AT1G34300	-	1:12503406-12506048	12503406	12506048	2643	2643	1.3179	2.86629e-32	2.96201e-31
AT5G62480	ATGSTU9	-	5:25088694-25089620	25088694	25089620	927	858	1.31784	1.02128e-07	2.40703e-07
AT4G38090	AT4G38090	-	4:17883617-17884821	17883617	17884821	1205	1117	1.31508	2.44523e-31	2.42475e-30
AT2G28440	AT2G28440	-	2:12161226-12162032	12161226	12162032	807	807	1.31498	3.56533e-10	1.02271e-09
AT4G02760	AT4G02760	-	4:1223959-1228941	1223959	1228941	4983	2691	1.31428	1.67177e-24	1.192e-23
AT4G13400	AT4G13400	-	4:7787691-7791284	7787691	7791284	3594	1340	1.31426	6.52362e-18	3.13708e-17
AT4G30600	AT4G30600	-	4:14937840-14941018	14937840	14941018	3179	2309	1.31333	2.3036e-28	1.97935e-27
AT1G14200	AT1G14200	-	1:4854384-4855200	4854384	4855200	817	817	1.31332	7.24801e-19	3.68873e-18
AT2G01100	AT2G01100	-	2:81436-83290	81436	83290	1855	1631	1.31325	5.36365e-23	3.49733e-22
ATMG00160	COX2	-	Mt:40502-42628	40502	42628	2127	783	1.31251	6.98922e-10	1.95839e-09
ATMG01130	ORF106F	-	Mt:289197-289517	289197	289517	321	321	1.31236	4.27887e-05	7.9583e-05
AT4G34280	AT4G34280	-	4:16406998-16410785	16406998	16410785	3788	2579	1.31123	4.05149e-22	2.49744e-21
AT3G20340	AT3G20340	-	3:7092900-7093501	7092900	7093501	602	602	1.31047	4.25602e-12	1.39751e-11
AT3G25013	AT3G25013	-	3:9113875-9116188	9113875	9116188	2314	791	1.3103	8.77226e-10	2.43463e-09
AT2G02370	AT2G02370	-	2:621155-623344	621155	623344	2190	1463	1.31015	8.25775e-23	5.31277e-22
AT1G01230	AT1G01230	-	1:97456-99240	97456	99240	1785	832	1.30989	2.88909e-36	3.55922e-35
AT1G05562	AT1G05562	-	1:1645875-1647162	1645875	1647162	1288	1288	1.30885	5.96647e-18	2.87488e-17
AT5G16160	AT5G16160	-	5:5275695-5276606	5275695	5276606	912	550	1.30824	6.68639e-12	2.1653e-11
AT3G14010	CID4	-	3:4636254-4640981	4636254	4640981	4728	2536	1.30799	4.03533e-29	3.59128e-28
ATCG00630	PSAJ	-	Pt:66929-67063	66929	67063	135	135	1.30791	0.000879147	0.00142391
AT5G27280	AT5G27280	-	5:9617486-9618481	9617486	9618481	996	813	1.30724	1.7323e-17	8.12035e-17
AT1G11350	CBRLK1	-	1:3817591-3820805	3817591	3820805	3215	2680	1.30712	1.39593e-24	9.97841e-24
ATMG01380	RRN5	-	Mt:361062-361179	361062	361179	118	118	1.30645	0.00127524	0.00202762
AT5G51570	AT5G51570	-	5:20949404-20951497	20949404	20951497	2094	1249	1.30596	1.60801e-36	2.00433e-35
AT5G65960	AT5G65960	-	5:26385348-26387447	26385348	26387447	2100	1497	1.30593	2.10615e-34	2.38946e-33
AT4G37483	AT4G37483	-	4:17621593-17621820	17621593	17621820	228	228	1.30552	1.57058e-07	3.64558e-07
AT4G28330	AT4G28330	-	4:14022387-14022987	14022387	14022987	601	601	1.30531	1.06001e-10	3.1595e-10
AT3G16940	AT3G16940	-	3:5781775-5786280	5781775	5786280	4506	3017	1.30517	7.18887e-29	6.32135e-28
AT1G22070	TGA3	-	1:7789348-7792114	7789348	7792114	2767	1751	1.30485	1.74168e-24	1.23768e-23
AT4G37550	AT4G37550	-	4:17643570-17645830	17643570	17645830	2261	1687	1.30467	7.79296e-33	8.23418e-32
AT5G05230	AT5G05230	-	5:1551388-1553805	1551388	1553805	2418	1559	1.3041	2.65858e-28	2.27627e-27
ATMG00070	NAD9	-	Mt:23663-24235	23663	24235	573	573	1.30339	5.6571e-09	1.47116e-08
AT4G00560	AT4G00560	-	4:240660-242379	240660	242379	1720	1337	1.30334	1.34313e-23	9.04342e-23
AT1G53440	AT1G53440	-	1:19945959-19951562	19945959	19951562	5604	3108	1.30234	1.85493e-13	6.71337e-13
AT3G52230	AT3G52230	-	3:19371213-19372687	19371213	19372687	1475	840	1.30224	3.56433e-18	1.73521e-17
AT1G36070	AT1G36070	-	1:13466911-13470936	13466911	13470936	4026	1945	1.30203	1.73593e-31	1.7387e-30
AT1G03130	PSAD-2	-	1:753307-754198	753307	754198	892	892	1.30191	1.11129e-07	2.61442e-07
AT1G75540	STH2	-	1:28366027-28367652	28366027	28367652	1626	1282	1.30182	3.80469e-27	3.07437e-26
AT1G35720	ANNAT1	-	1:13225197-13227195	13225197	13227195	1999	1317	1.30161	5.36377e-33	5.71741e-32
ATMG00220	COB	-	Mt:60235-61416	60235	61416	1182	1182	1.30113	1.49646e-10	4.40762e-10
ATMG00610	ORF161	-	Mt:176542-177027	176542	177027	486	486	1.30106	0.00161725	0.00254321
AT5G38850	AT5G38850	-	5:15555156-15558732	15555156	15558732	3577	3294	1.30086	1.47693e-09	4.02317e-09
AT2G28800	ALB3	-	2:12356364-12359252	12356364	12359252	2889	2085	1.30047	2.24398e-26	1.74799e-25
AT1G49780	PUB26	-	1:18428906-18430319	18428906	18430319	1414	1414	1.30004	4.21549e-13	1.48875e-12
AT1G53450	AT1G53450	-	1:19951006-19954115	19951006	19954115	3110	2379	1.29992	3.9075e-27	3.15414e-26
ATMG00410	ATP6	-	Mt:111587-112907	111587	112907	1321	1321	1.29968	2.20223e-08	5.47228e-08
AT1G56170	NF-YC2	-	1:21024764-21025883	21024764	21025883	1120	1027	1.29964	1.47297e-21	8.83519e-21
AT3G02300	AT3G02300	-	3:461148-464174	461148	464174	3027	1832	1.29883	9.52975e-30	8.73184e-29
AT2G16390	DRD1	-	2:7097280-7101261	7097280	7101261	3982	3104	1.29857	8.16535e-23	5.25532e-22
AT4G19190	AT4G19190	-	4:10493247-10496160	10493247	10496160	2914	2055	1.29836	1.14208e-34	1.31242e-33
AT3G59300	AT3G59300	-	3:21918455-21922706	21918455	21922706	4252	2421	1.2975	2.83115e-28	2.42035e-27
AT3G18270	CYP77A5P	-	3:6261905-6264309	6261905	6264309	2405	1622	1.2972	7.50091e-35	8.70837e-34
AT1G06260	AT1G06260	-	1:1916430-1917585	1916430	1917585	1156	1051	1.29699	1.47458e-12	4.99805e-12
AT2G17787	AT2G17787	-	2:7731075-7733019	7731075	7733019	1945	1440	1.2965	8.08473e-27	6.43698e-26
ATMG00560	RPL2	-	Mt:154744-157345	154744	157345	2602	1050	1.29616	6.24942e-10	1.76101e-09
AT1G78480	AT1G78480	-	1:29525501-29526363	29525501	29526363	863	609	1.29566	3.5828e-06	7.37697e-06
AT3G22960	PKP1	-	3:8139235-8141985	8139235	8141985	2751	2139	1.29444	7.03566e-21	4.06737e-20
AT1G74300	AT1G74300	-	1:27935298-27936608	27935298	27936608	1311	1245	1.29389	7.10812e-05	0.000129487
AT2G04890	SCL21	-	2:1720361-1722604	1720361	1722604	2244	1863	1.29389	1.66998e-27	1.3769e-26
AT3G14680	CYP72A14	-	3:4934420-4936563	4934420	4936563	2144	1698	1.29289	1.38147e-16	6.12951e-16
AT2G07741	AT2G07741	-	2:3502319-3503476	3502319	3503476	1158	1158	1.29271	1.11772e-07	2.62809e-07
AT3G14550	GGPS3	-	3:4884566-4885982	4884566	4885982	1417	1308	1.29262	2.98795e-08	7.33958e-08
AT5G55630	ATKCO1	-	5:22531358-22533122	22531358	22533122	1765	1681	1.2918	9.86446e-15	3.89584e-14
AT3G11540	SPY	-	3:3631887-3637955	3631887	3637955	6069	3788	1.29138	7.775e-26	5.93094e-25
AT4G31290	AT4G31290	-	4:15185886-15188484	15185886	15188484	2599	1275	1.29137	8.95893e-25	6.46135e-24
AT1G43245	AT1G43245	-	1:16308882-16310930	16308882	16310930	2049	1824	1.29123	7.17284e-20	3.90778e-19
AT1G71130	AT1G71130	-	1:26822788-26823530	26822788	26823530	743	743	1.29113	1.6151e-14	6.28767e-14
AT5G19950	AT5G19950	-	5:6740777-6743773	6740777	6743773	2997	1789	1.29111	4.46246e-31	4.36625e-30
AT1G77290	AT1G77290	-	1:29038375-29039838	29038375	29039838	1464	1366	1.29108	3.48178e-16	1.50809e-15
ATMG01275	NAD1	-	Mt:318004-318390	318004	318390	387	387	1.29097	4.15987e-06	8.49899e-06
AT3G08720	S6K2	-	3:2648509-2651160	2648509	2651160	2652	2078	1.29067	1.42822e-26	1.12392e-25
ATMG01320	NAD2	-	Mt:327890-333105	327890	333105	5216	922	1.29022	1.19236e-07	2.79815e-07
AT1G68870	ATSOFL2	-	1:25889081-25889734	25889081	25889734	654	654	1.29008	7.11947e-10	1.99258e-09
AT5G23890	AT5G23890	-	5:8058689-8063201	8058689	8063201	4513	3137	1.28959	1.9889e-20	1.1222e-19
AT5G59700	AT5G59700	-	5:24052385-24055425	24052385	24055425	3041	2861	1.28926	8.6225e-21	4.95933e-20
ATMG01120	NAD1	-	Mt:287917-289083	287917	289083	1167	273	1.28902	2.39604e-06	4.9991e-06
AT1G48550	AT1G48550	-	1:17950569-17952694	17950569	17952694	2126	1263	1.28849	2.03256e-25	1.51431e-24
AT4G32480	AT4G32480	-	4:15676404-15677973	15676404	15677973	1570	1145	1.28829	8.32154e-24	5.6775e-23
AT5G65207	AT5G65207	-	5:26052245-26052644	26052245	26052644	400	400	1.28686	5.23015e-13	1.83369e-12
AT4G27020	AT4G27020	-	4:13568432-13571474	13568432	13571474	3043	1837	1.28683	5.43807e-32	5.58218e-31
AT4G10610	ATRBP37	-	4:6557177-6559595	6557177	6559595	2419	1716	1.28634	9.07332e-26	6.90265e-25
AT5G62200	AT5G62200	-	5:24984236-24985711	24984236	24985711	1476	837	1.28597	2.55949e-25	1.89604e-24
AT1G37080	AT1G37080	-	1:14111458-14112255	14111458	14112255	798	675	1.28571	3.55098e-06	7.31501e-06
AT3G59330	AT3G59330	-	3:21926961-21928499	21926961	21928499	1539	937	1.28509	8.47716e-10	2.35621e-09
AT1G78600	LZF1	-	1:29567106-29568859	29567106	29568859	1754	1421	1.28405	4.05179e-26	3.13315e-25
AT5G18170	GDH1	-	5:6006039-6008472	6006039	6008472	2434	1593	1.28376	8.31672e-31	8.01236e-30
AT2G29950	ELF4-L1	-	2:12767585-12768435	12767585	12768435	851	851	1.28319	0.000543645	0.00090086
AT1G07728	AT1G07728	-	1:2395451-2397345	2395451	2397345	1895	1895	1.2825	2.54894e-21	1.51124e-20
AT1G17860	AT1G17860	-	1:6149301-6150038	6149301	6150038	738	738	1.2816	4.52204e-08	1.09568e-07
AT3G57590	AT3G57590	-	3:21330182-21331396	21330182	21331396	1215	1215	1.28143	4.99275e-18	2.41463e-17
AT4G11360	RHA1B	-	4:6906014-6906759	6906014	6906759	746	746	1.28106	6.72646e-24	4.61528e-23
AT5G16380	AT5G16380	-	5:5359363-5360710	5359363	5360710	1348	1052	1.28101	2.38517e-30	2.253e-29
AT4G18130	PHYE	-	4:10042137-10046082	10042137	10046082	3946	3648	1.28072	4.44112e-33	4.75489e-32
AT5G40840	SYN2	-	5:16359430-16363814	16359430	16363814	4385	2706	1.28064	8.45823e-19	4.27764e-18
ATMG00090	ATMG00090	ATMG00080	Mt:25482-28733	25482	28733	3252	1671	1.28043	1.33235e-10	3.94003e-10
AT5G19860	AT5G19860	-	5:6714264-6715875	6714264	6715875	1612	853	1.27988	2.62437e-21	1.55379e-20
AT1G75295	AT1G75295	-	1:28254366-28257151	28254366	28257151	2786	2076	1.2796	1.12025e-29	1.02059e-28
AT1G07725	ATEXO70H6	-	1:2394801-2397272	2394801	2397272	2472	2472	1.27949	5.40165e-21	3.13774e-20
AT5G17440	AT5G17440	-	5:5749762-5753643	5749762	5753643	3882	1530	1.27856	1.3973e-25	1.05121e-24
AT2G07811	AT2G07811	-	2:3313598-3314901	3313598	3314901	1304	1304	1.27742	5.40324e-08	1.30064e-07
AT3G57880	AT3G57880	-	3:21430983-21434600	21430983	21434600	3618	2960	1.27722	1.70615e-30	1.62248e-29
AT3G24520	AT-HSFC1	-	3:8941066-8942874	8941066	8942874	1809	1725	1.2767	5.54457e-34	6.17048e-33
AT2G07687	AT2G07687	-	2:3311654-3312651	3311654	3312651	998	998	1.27663	1.32251e-12	4.50061e-12
AT4G14145	AT4G14145	-	4:8152290-8153678	8152290	8153678	1389	798	1.27607	7.12352e-26	5.44624e-25
AT1G69220	SIK1	-	1:26020089-26026171	26020089	26026171	6083	2772	1.27572	5.98442e-31	5.80839e-30
AT2G02350	SKIP3	-	2:617800-619091	617800	619091	1292	1030	1.27562	3.71747e-07	8.34668e-07
AT3G13910	AT3G13910	-	3:4590919-4591483	4590919	4591483	565	565	1.27553	9.06546e-07	1.96808e-06
AT4G25500	RS40	-	4:13024571-13027484	13024571	13027484	2914	1768	1.27458	1.80769e-27	1.4861e-26
AT1G60420	AT1G60420	-	1:22261888-22264408	22261888	22264408	2521	1992	1.27419	3.71904e-33	3.99951e-32
AT1G62770	AT1G62770	-	1:23245886-23246890	23245886	23246890	1005	868	1.273	4.3286e-09	1.13562e-08
AT5G15910	AT5G15910	-	5:5193111-5195396	5193111	5195396	2286	1100	1.27282	6.21345e-22	3.79283e-21
AT3G04160	AT3G04160	-	3:1091147-1094346	1091147	1094346	3200	2650	1.27244	1.77085e-20	1.00252e-19
AT3G17000	UBC32	-	3:5797179-5799683	5797179	5799683	2505	1263	1.27206	1.63664e-32	1.71114e-31
AT5G08230	AT5G08230	AT5G08210;AT5G08220	5:2641394-2649788	2641394	2649788	8395	5082	1.27185	2.7182e-18	1.33249e-17
AT2G03340	WRKY3	-	2:1014350-1017148	1014350	1017148	2799	2128	1.2714	9.14924e-33	9.65518e-32
AT1G21651	AT1G21651	AT1G21650	1:7600805-7604215	7600805	7604215	3411	2755	1.27061	2.05397e-16	9.01414e-16
AT1G04620	AT1G04620	-	1:1282741-1286584	1282741	1286584	3844	1609	1.2705	3.54708e-28	3.02171e-27
AT5G66490	AT5G66490	-	5:26547227-26547768	26547227	26547768	542	542	1.27022	0.000216551	0.000374572
AT4G26060	AT4G26060	-	4:13214746-13216461	13214746	13216461	1716	858	1.27018	6.17057e-17	2.79052e-16
AT3G29644	AT3G29644	-	3:11499199-11501366	11499199	11501366	2168	785	1.27017	3.5653e-14	1.35526e-13
AT1G53410	AT1G53410	-	1:19925839-19925910	19925839	19925910	72	72	1.26864	0.000436839	0.000731103
AT1G28960	ATNUDX15	-	1:10109500-10111660	10109500	10111660	2161	1570	1.26791	3.7839e-27	3.06021e-26
AT5G58340	AT5G58340	AT5G58350	5:23582495-23585148	23582495	23585148	2654	1843	1.26783	6.65611e-13	2.31256e-12
AT4G19850	PP2-A2	-	4:10776657-10777588	10776657	10777588	932	830	1.26738	0.000164939	0.00028878
AT2G36370	AT2G36370	-	2:15247793-15252967	15247793	15252967	5175	2965	1.26671	2.91901e-20	1.62747e-19
AT3G62690	ATL5	-	3:23185348-23186701	23185348	23186701	1354	1354	1.26656	2.7878e-12	9.2746e-12
AT3G57050	CBL	-	3:21111700-21114662	21111700	21114662	2963	1864	1.26639	2.14022e-25	1.59242e-24
AT3G44006	AT3G44006	-	3:15796238-15796417	15796238	15796417	180	180	1.26637	0.000373549	0.000628722
AT3G10740	ASD1	-	3:3360888-3365414	3360888	3365414	4527	2478	1.26632	3.36107e-29	3.00543e-28
AT1G10660	AT1G10660	-	1:3532424-3535131	3532424	3535131	2708	1674	1.26629	9.09699e-35	1.05253e-33
AT2G26150	ATHSFA2	-	2:11135682-11137396	11135682	11137396	1715	1422	1.26616	5.0438e-09	1.31713e-08
AT5G44310	AT5G44310	-	5:17847781-17849536	17847781	17849536	1756	1488	1.2656	1.80809e-24	1.28379e-23
ATMG01220	ORF113	-	Mt:305221-305562	305221	305562	342	342	1.26557	0.000506358	0.00084204
AT5G06140	SNX1	-	5:1856008-1858785	1856008	1858785	2778	1446	1.26548	2.43788e-28	2.09366e-27
AT2G20950	AT2G20950	-	2:9003135-9005938	9003135	9005938	2804	2321	1.265	4.82512e-13	1.69591e-12
AT5G42690	AT5G42690	-	5:17116428-17119838	17116428	17119838	3411	2190	1.26442	8.87218e-18	4.23996e-17
AT2G07717	AT2G07717	-	2:3418229-3424177	3418229	3424177	5949	5949	1.26431	2.76483e-08	6.81127e-08
AT1G11300	AT1G11300	-	1:3794238-3800719	3794238	3800719	6482	5104	1.26348	3.66677e-19	1.91036e-18
AT1G72645	AT1G72645	-	1:27348381-27349219	27348381	27349219	839	839	1.26304	1.22815e-12	4.18687e-12
AT1G10890	AT1G10890	-	1:3627726-3630765	3627726	3630765	3040	1254	1.26188	2.4207e-19	1.27371e-18
AT1G06640	AT1G06640	-	1:2032338-2034018	2032338	2034018	1681	1510	1.26129	3.72243e-13	1.31874e-12
AT5G40500	AT5G40500	-	5:16227834-16228693	16227834	16228693	860	697	1.26097	0.000149348	0.000262459
AT1G31440	AT1G31440	-	1:11255836-11258715	11255836	11258715	2880	1870	1.2608	1.93559e-27	1.58585e-26
AT1G16930	AT1G16930	-	1:5789987-5791534	5789987	5791534	1548	1350	1.26066	9.91374e-11	2.96274e-10
AT1G78476	AT1G78476	-	1:29523982-29526284	29523982	29526284	2303	638	1.26012	5.02588e-06	1.01835e-05
AT1G33250	AT1G33250	-	1:12057250-12059485	12057250	12059485	2236	2060	1.25976	1.19219e-26	9.41683e-26
AT5G44280	ATRING1A	-	5:17835849-17839254	17835849	17839254	3406	2023	1.25953	7.85141e-25	5.69656e-24
AT1G11170	AT1G11170	-	1:3740765-3744675	3740765	3744675	3911	2295	1.25926	2.73891e-16	1.19273e-15
AT2G07771	AT2G07771	AT2G07742	2:3239693-3240463	3239693	3240463	771	771	1.25883	0.000122595	0.000217432
ATMG00900	CCB256	-	Mt:239988-240758	239988	240758	771	771	1.25882	0.000122502	0.000217289
AT4G21580	AT4G21580	-	4:11475719-11477768	11475719	11477768	2050	1335	1.25882	2.89332e-30	2.71934e-29
AT3G07560	APM2	-	3:2411321-2413475	2411321	2413475	2155	1375	1.25825	8.30679e-26	6.33374e-25
AT1G24450	NFD2	-	1:8664153-8665289	8664153	8665289	1137	836	1.25657	3.79087e-22	2.3419e-21
AT2G25350	AT2G25350	-	2:10797599-10800756	10797599	10800756	3158	1932	1.25611	1.22351e-23	8.26431e-23
AT3G25882	NIMIN-2	-	3:9470417-9470950	9470417	9470950	534	534	1.25593	1.9833e-07	4.56008e-07
AT2G43100	IPMI2	-	2:17920660-17921689	17920660	17921689	1030	1030	1.2557	1.08221e-05	2.13082e-05
AT3G52561	AT3G52561	-	3:19497082-19497596	19497082	19497596	515	515	1.25524	2.65567e-06	5.51903e-06
AT4G33740	AT4G33740	-	4:16186830-16189007	16186830	16189007	2178	2055	1.25493	2.24372e-28	1.92985e-27
AT2G07712	AT2G07712	-	2:3400730-3402757	3400730	3402757	2028	2028	1.25476	2.54355e-07	5.79081e-07
AT3G02690	AT3G02690	-	3:579586-581611	579586	581611	2026	1458	1.2546	4.16732e-31	4.08455e-30
AT3G30720	QQS	-	3:12349047-12349832	12349047	12349832	786	586	1.25448	0.00171632	0.00269002
AT1G54100	ALDH7B4	-	1:20195264-20199130	20195264	20199130	3867	1975	1.2532	2.76328e-23	1.8264e-22
AT3G08840	AT3G08840	-	3:2679648-2686224	2679648	2686224	6577	3050	1.25319	1.8751e-21	1.11839e-20
AT4G03410	AT4G03410	AT4G03405	4:1501168-1503561	1501168	1503561	2394	1883	1.25285	4.31072e-14	1.6302e-13
AT3G03790	AT3G03790	-	3:961997-968149	961997	968149	6153	4032	1.25257	3.78006e-22	2.33608e-21
AT4G36980	AT4G36980	-	4:17433601-17437069	17433601	17437069	3469	2162	1.25178	2.19215e-20	1.23441e-19
AT5G05750	AT5G05750	-	5:1727429-1728933	1727429	1728933	1505	1505	1.25165	1.55927e-26	1.22477e-25
AT5G45710	HSFA4C	-	5:18540850-18542863	18540850	18542863	2014	1608	1.25124	5.89244e-21	3.41463e-20
AT1G74310	ATHSP101	-	1:27936508-27940190	27936508	27940190	3683	3165	1.25003	3.68158e-15	1.49947e-14
AT4G35420	DRL1	-	4:16833933-16835619	16833933	16835619	1687	1147	1.25001	8.83383e-14	3.27558e-13
AT3G48780	ATSPT1	-	3:18089061-18093088	18089061	18093088	4028	2420	1.24959	9.57108e-28	7.97685e-27
AT4G37180	AT4G37180	-	4:17504564-17506367	17504564	17506367	1804	1436	1.24916	2.64443e-28	2.2653e-27
AT3G02380	COL2	-	3:487236-488693	487236	488693	1458	1315	1.24856	1.25606e-11	3.9965e-11
AT3G56250	AT3G56250	-	3:20866120-20867840	20866120	20867840	1721	669	1.24838	1.42093e-06	3.03077e-06
AT4G39100	SHL1	-	4:18217939-18220290	18217939	18220290	2352	1202	1.24825	4.00773e-30	3.72537e-29
AT2G40890	CYP98A3	-	2:17058053-17060652	17058053	17060652	2600	1885	1.24777	6.85122e-23	4.43482e-22
AT1G64330	AT1G64330	-	1:23870905-23874198	23870905	23874198	3294	2047	1.24756	2.1915e-23	1.45587e-22
AT5G25170	AT5G25170	-	5:8693137-8695095	8693137	8695095	1959	1434	1.24706	5.90546e-14	2.2135e-13
ATMG01200	ORF294	-	Mt:303836-304720	303836	304720	885	885	1.24688	7.55726e-09	1.94795e-08
AT1G66890	AT1G66890	-	1:24957558-24958114	24957558	24958114	557	557	1.24633	8.07229e-05	0.000146217
AT1G61065	AT1G61065	-	1:22490244-22491461	22490244	22491461	1218	860	1.24583	1.83957e-16	8.0963e-16
AT1G61275	U12	-	1:22603121-22603295	22603121	22603295	175	175	1.24564	0.000613405	0.00101101
AT5G06310	AtPOT1b	-	5:1928391-1930951	1928391	1930951	2561	1598	1.24534	7.32254e-16	3.10882e-15
AT5G49440	AT5G49440	-	5:20048239-20049597	20048239	20049597	1359	1359	1.24483	2.1525e-12	7.2192e-12
ATMG00730	COX3	-	Mt:217631-219077	217631	219077	1447	1447	1.24422	8.86403e-12	2.8525e-11
ATMG00280	ORF110A	-	Mt:77819-78151	77819	78151	333	333	1.24419	0.00456827	0.00681236
AT5G49120	AT5G49120	-	5:19908626-19909399	19908626	19909399	774	694	1.24323	1.18985e-05	2.33108e-05
AT5G03140	AT5G03140	-	5:737590-740016	737590	740016	2427	2427	1.24288	9.93237e-08	2.34256e-07
AT1G31770	ABCG14	-	1:11374893-11377794	11374893	11377794	2902	2456	1.24261	7.49646e-19	3.80945e-18
AT5G26980	SYP41	-	5:9488148-9490816	9488148	9490816	2669	1757	1.24258	5.45394e-29	4.82334e-28
AT1G75100	JAC1	-	1:28190816-28193800	28190816	28193800	2985	2279	1.24238	2.1879e-08	5.44065e-08
AT2G02060	AT2G02060	-	2:495570-497747	495570	497747	2178	1030	1.24203	1.60581e-07	3.72299e-07
AT2G07726	AT2G07726	AT2G07725	2:3448961-3449179	3448961	3449179	219	219	1.24152	2.70588e-05	5.13769e-05
AT3G28690	AT3G28690	-	3:10755039-10757868	10755039	10757868	2830	2468	1.24099	1.10285e-25	8.33762e-25
AT3G47640	PYE	-	3:17567126-17569385	17567126	17569385	2260	1255	1.24006	1.07066e-25	8.10148e-25
AT3G16570	RALF23	-	3:5644698-5645414	5644698	5645414	717	717	1.23993	3.08518e-07	6.9798e-07
AT1G26218	AT1G26218	AT1G26230	1:9071058-9072273	9071058	9072273	1216	1135	1.2399	1.64876e-11	5.19518e-11
AT3G02540	RAD23-3	-	3:532808-536342	532808	536342	3535	1942	1.23966	9.97658e-29	8.70482e-28
AT5G20510	AL5	-	5:6939813-6942908	6939813	6942908	3096	1023	1.23925	4.02448e-25	2.95798e-24
AT3G16850	AT3G16850	-	3:5748570-5751297	5748570	5751297	2728	1806	1.23909	1.09159e-28	9.50966e-28
AT2G46610	RS31a	-	2:19136566-19138762	19136566	19138762	2197	1656	1.23872	3.89105e-28	3.30642e-27
AT3G19580	AZF2	-	3:6803072-6804233	6803072	6804233	1162	1162	1.23846	2.40855e-10	7.00508e-10
AT5G17570	AT5G17570	-	5:5792926-5794792	5792926	5794792	1867	1212	1.2382	6.4404e-19	3.29555e-18
AT1G49700	AT1G49700	-	1:18388792-18390496	18388792	18390496	1705	840	1.23752	1.75478e-09	4.75556e-09
AT2G46060	AT2G46060	-	2:18941099-18945099	18941099	18945099	4001	2865	1.23712	5.59683e-14	2.10102e-13
AT3G26690	ATNUDX13	-	3:9804253-9805715	9804253	9805715	1463	1091	1.23707	2.8632e-14	1.09452e-13
AT5G48380	BIR1	-	5:19604089-19607059	19604089	19607059	2971	2756	1.23592	1.08735e-20	6.2223e-20
AT2G07719	AT2G07719	-	2:3432795-3433495	3432795	3433495	701	701	1.23562	0.00254864	0.00392404
AT4G08590	ORL1	-	4:5463885-5466671	5463885	5466671	2787	1634	1.23559	9.69088e-16	4.09275e-15
AT1G23560	AT1G23560	-	1:8352615-8354262	8352615	8354262	1648	1303	1.23557	3.02958e-05	5.72276e-05
AT1G08460	HDA08	-	1:2672451-2674628	2672451	2674628	2178	1369	1.2353	5.30628e-30	4.91622e-29
AT2G18270	AT2G18270	-	2:7946158-7946406	7946158	7946406	249	249	1.23504	1.31e-05	2.5579e-05
AT2G46900	AT2G46900	-	2:19269558-19272195	19269558	19272195	2638	2212	1.23503	3.77749e-29	3.36764e-28
AT1G03440	AT1G03440	-	1:852366-854032	852366	854032	1667	1667	1.23494	8.40615e-14	3.12384e-13
AT1G23550	SRO2	-	1:8350793-8352791	8350793	8352791	1999	1351	1.23382	1.45035e-13	5.29667e-13
AT4G32940	GAMMA-VPE	-	4:15900270-15903268	15900270	15903268	2999	1879	1.23336	2.30937e-27	1.88117e-26
AT3G63420	GG1	-	3:23417272-23418698	23417272	23418698	1427	694	1.2324	1.56277e-13	5.68517e-13
AT4G27610	AT4G27610	-	4:13785432-13788433	13785432	13788433	3002	2322	1.23192	1.1573e-27	9.60748e-27
AT3G44300	AtNIT2	-	3:15983311-15985535	15983311	15985535	2225	1423	1.23168	0.000184606	0.000321649
AT3G53230	AT3G53230	-	3:19723351-19726672	19723351	19726672	3322	2696	1.23129	9.60445e-20	5.18413e-19
AT1G78930	AT1G78930	-	1:29678097-29680757	29678097	29680757	2661	2073	1.23081	5.84279e-28	4.92289e-27
AT4G25200	ATHSP23.6-MITO	-	4:12917017-12918053	12917017	12918053	1037	900	1.23071	6.65499e-12	2.15555e-11
AT4G16160	ATOEP16-S	-	4:9157515-9158933	9157515	9158933	1419	762	1.23051	8.60667e-22	5.21608e-21
AT2G03020	AT2G03020	-	2:882645-884148	882645	884148	1504	1117	1.23029	0.00137607	0.00217954
AT3G10770	AT3G10770	-	3:3372264-3374271	3372264	3374271	2008	1444	1.23029	2.31788e-23	1.5356e-22
AT5G25900	GA3	-	5:9036018-9038406	9036018	9038406	2389	1713	1.22975	2.94237e-24	2.06063e-23
AT2G07699	AT2G07699	-	2:3368151-3369308	3368151	3369308	1158	1158	1.22958	4.38636e-07	9.79008e-07
AT2G46730	AT2G46730	-	2:19200860-19203138	19200860	19203138	2279	2279	1.22934	2.64236e-21	1.56334e-20
AT4G31840	ENODL15	-	4:15401640-15402617	15401640	15402617	978	883	1.22846	0.00013961	0.000246266
AT2G39380	ATEXO70H2	-	2:16447006-16449083	16447006	16449083	2078	2078	1.22838	1.09207e-19	5.86838e-19
AT3G18145	AT3G18145	-	3:6214980-6217276	6214980	6217276	2297	2297	1.22834	4.12798e-08	1.00322e-07
AT4G37553	AT4G37553	-	4:17644898-17649055	17644898	17649055	4158	773	1.22803	6.6427e-28	5.58297e-27
AT3G15590	AT3G15590	-	3:5275401-5277991	5275401	5277991	2591	2150	1.22784	2.26783e-24	1.60015e-23
AT2G35050	AT2G35050	-	2:14768724-14775035	14768724	14775035	6312	4346	1.22778	2.3939e-25	1.77882e-24
AT2G04900	AT2G04900	-	2:1722481-1723831	1722481	1723831	1351	631	1.22716	1.555e-23	1.04326e-22
AT5G04180	ACA3	-	5:1147648-1149284	1147648	1149284	1637	1140	1.22697	0.00102143	0.00164273
AT4G16330	AT4G16330	-	4:9226122-9227953	9226122	9227953	1832	1376	1.226	2.60745e-18	1.27931e-17
AT3G14150	AT3G14150	-	3:4690450-4693001	4690450	4693001	2552	1393	1.2253	1.62719e-27	1.34293e-26
AT5G59570	AT5G59570	-	5:24003888-24005512	24003888	24005512	1625	1451	1.22516	3.49493e-22	2.16223e-21
AT4G25700	chy1	-	4:13093934-13095935	13093934	13095935	2002	1445	1.22501	3.61381e-24	2.52043e-23
AT4G32910	AT4G32910	-	4:15881256-15885416	15881256	15885416	4161	2465	1.22498	3.95409e-21	2.31916e-20
AT4G31877	MIR156C	-	4:15413319-15415873	15413319	15415873	2555	857	1.22487	1.93771e-13	7.00099e-13
[truncated: 687 more rows]

## Sheet: Common Auxin
69 common elements in "up-reg" and "auxin"			42 common elements in "down-reg" and "auxin"
input	symbol	short description	input	symbol	short description
AT1G12110	NRT1.1	nitrate transporter 1.1	AT5G23850	AT5G23850	Arabidopsis thaliana protein of unknown function (DUF821)
AT2G34510	AT2G34510	Protein of unknown function, DUF642	AT1G63420	AT1G63420	Arabidopsis thaliana protein of unknown function (DUF821)
AT5G49800	AT5G49800	Polyketide cyclase/dehydrase and lipid transport superfamily protein	AT5G22360	VAMP714	vesicle-associated membrane protein 714
AT4G31500	CYP83B1	cytochrome P450, family 83, subfamily B, polypeptide 1	AT3G02875	ILR1	Peptidase M20/M25/M40 family protein
AT4G31820	ENP	Phototropic-responsive NPH3 family protein	AT5G64780	AT5G64780	Uncharacterised conserved protein UCP009193
AT4G21740	AT4G21740	NULL	AT1G10210	MPK1	mitogen-activated protein kinase 1
AT5G54510	DFL1	Auxin-responsive GH3 family protein	AT1G16510	AT1G16510	SAUR-like auxin-responsive protein family
AT3G53480	ABCG37	pleiotropic drug resistance 9	AT5G10510	AIL6	AINTEGUMENTA-like 6
AT2G46530	ARF11	auxin response factor 11	AT5G64260	EXL2	EXORDIUM like 2
AT4G30290	XTH19	xyloglucan endotransglucosylase/hydrolase 19	AT5G66580	AT5G66580	NULL
AT5G57420	IAA33	indole-3-acetic acid inducible 33	AT2G20120	COV1	Protein of unknown function (DUF502)
AT1G29420	AT1G29420	SAUR-like auxin-responsive protein family	AT3G44300	NIT2	nitrilase 2
AT5G63310	NDPK2	nucleoside diphosphate kinase 2	AT2G01940	SGR5	C2H2-like zinc finger protein
AT2G01420	PIN4	Auxin efflux carrier family protein	AT3G60690	AT3G60690	SAUR-like auxin-responsive protein family
AT5G43700	ATAUX2-11	AUX/IAA transcriptional regulator family protein	AT3G63420	GG1	Ggamma-subunit 1
AT3G07390	AIR12	auxin-responsive family protein	AT5G03540	EXO70A1	exocyst subunit exo70 family protein A1
AT5G37770	TCH2	EF hand calcium-binding protein family	AT1G15050	IAA34	indole-3-acetic acid inducible 34
AT1G13210	ACA.l	autoinhibited Ca2+/ATPase II	AT1G08980	AMI1	amidase 1
AT1G61255	AT1G61255	NULL	AT2G22240	MIPS2	myo-inositol-1-phosphate synthase 2
AT5G67060	HEC1	basic helix-loop-helix (bHLH) DNA-binding superfamily protein	AT5G20960	AO1	aldehyde oxidase 1
AT1G30690	AT1G30690	Sec14p-like phosphatidylinositol transfer family protein	AT1G04100	IAA10	indoleacetic acid-induced protein 10
AT3G51670	AT3G51670	SEC14 cytosolic factor family protein / phosphoglyceride transfer family protein	AT3G48360	BT2	BTB and TAZ domain protein 2
AT3G50340	AT3G50340	NULL	AT4G16420	ADA2B	homolog of yeast ADA2 2B
AT4G20420	AT4G20420	Tapetum specific protein TAP35/TAP44	AT4G16780	HB-2	homeobox protein 2
AT2G38120	AUX1	Transmembrane amino acid transporter family protein	AT5G66590	AT5G66590	CAP (Cysteine-rich secretory proteins, Antigen 5, and Pathogenesis-related 1 protein) superfamily protein
AT3G06868	AT3G06868	NULL	AT3G26790	FUS3	AP2/B3-like transcriptional factor family protein
[truncated: 43 more rows]

## Sheet: GO_BP
GO Term	Enrichment Factor	p-value
[truncated: 110 more rows]

## Sheet: GO_MF
GO Term	Enrichment Factor	p-value
[truncated: 16 more rows]

## Sheet: GO_CC
GO Term	Enrichment Factor	p-value
[truncated: 7 more rows]

[truncated: 8 more sheets: Todas_GO, Auxin, ABA, GA, JA, ET, CIT, BR]
