# Supplementary material for: Unveiling Molecular Signatures in Light-Induced Seed Germination: Insights from PIN3, PIN7, and AUX1 in Arabidopsis thaliana
Source: Plants (Basel). 2024 Jan 30;13(3):408. doi: 10.3390/plants13030408 (PMC10856848; doi:10.3390/plants13030408)
Supplement: Supplementary file 1 [file plants-13-00408-s001.zip › Supplementary_Table_S2.xlsx]

## Sheet: List of primers
	Suppl. Table S2. Primers used for Gene Expression analysis by Real Time qPCR.
	oligo ID	Sequence
	PIN3-RT-F	GGATTACGTGGTGATTTACTGC
	PIN3-RT-R	GATGAACATTGTACTCCTTCGC
	PIN7-RT-F	CCGGAGTTTTCTACCGGTAATA
	PIN7-RT-R	ACATTCGAATCTCTTTTGCACC
	AUX1-RT-F	TCAGAATGCGGCGGAGAAGC
	AUX1-RT-R	GAACCCAAACCACCACGAAAGC
	PP2A-RT-F	TAACGTGGCCAAAATGATGC
	PP2A-RT-R	GTTCTCCACAACCGATTGGT
